# Supplementary material
Source: publisher figshare collection journal article supplement (https://springernature.figshare.com/articles/dataset/_/28766570)
Supplement: Supplementary file 1 [file 1]

## Sheet: F1b-e
F1b		Distance(A)		F1c	MoS2	#Energy	TDOS		Cd/MoS2	#Energy	TDOS		F1e	VSe2	CoSe	Sb	VS2xSe2(1–x)	Pd	Cu	Au	Pt	Ag	VS2	1T′-MoTe2	Cd
	X	Y				-7.085	0			-11.399	0			605℃	535℃	660℃	590℃	520℃	650℃	460℃	560℃	640℃	605℃	800℃	108℃
	3.91102	0				-7.08	0			-11.394	0
	3.87286	0.04				-7.075	0			-11.389	0
	3.82847	0.08				-7.07	0			-11.384	0
	3.77787	0.12				-7.065	0			-11.379	0
	3.72084	0.1599				-7.06	0			-11.374	0
	3.65559	0.1999				-7.055	0			-11.369	0
	3.5817	0.2399				-7.05	0			-11.364	0
	3.49743	0.2799				-7.045	0			-11.359	0
	3.40113	0.3199				-7.04	0			-11.354	0
	3.29212	0.3599				-7.035	0			-11.349	0
	3.16771	0.3999				-7.03	0			-11.344	0
	3.02748	0.4398				-7.025	0			-11.339	0
	2.86682	0.4798				-7.02	0			-11.334	0
	2.68373	0.5198				-7.015	0			-11.329	0
	2.47619	0.5598				-7.01	0			-11.324	0
	2.24054	0.5998				-7.005	0			-11.319	0
	1.9783	0.6398				-7	0			-11.314	0
	1.70172	0.6797				-6.995	0			-11.309	0
	1.41331	0.7197				-6.99	0			-11.304	0
	1.07478	0.7597				-6.985	0			-11.299	0
	0.65421	0.7997				-6.98	0			-11.294	0
	0.14159	0.8397				-6.975	0			-11.289	0
	-0.49717	0.8797				-6.97	0			-11.284	0
	-1.26408	0.9197				-6.965	0			-11.279	0
	-2.14267	0.9596				-6.96	0			-11.274	0
	-3.12641	0.9996				-6.955	0			-11.269	0
	-4.19721	1.0396				-6.95	0			-11.264	0
	-5.3253	1.0796				-6.945	0			-11.259	0
	-6.50375	1.1196				-6.94	0			-11.254	0
	-7.68881	1.1596				-6.935	0			-11.249	0
	-8.87219	1.1996				-6.93	0			-11.244	0
	-10.027	1.2395				-6.925	0			-11.239	0
	-11.1331	1.2795				-6.92	0			-11.234	0
	-12.1818	1.3195				-6.915	0			-11.229	0
	-13.1457	1.3595				-6.91	0			-11.224	0
	-14.022	1.3995				-6.905	0			-11.219	0
	-14.7944	1.4395				-6.9	0			-11.214	0
	-15.4572	1.4794				-6.895	0			-11.209	0
	-16.0038	1.5194				-6.89	0			-11.204	0
	-16.4247	1.5594				-6.885	0			-11.199	0
	-16.7197	1.5994				-6.88	0			-11.194	0
	-16.8872	1.6394				-6.875	0			-11.189	0
	-16.9272	1.6794				-6.87	0			-11.184	0
	-16.842	1.7194				-6.865	0			-11.179	0
	-16.6333	1.7593				-6.86	0			-11.174	0
	-16.3069	1.7993				-6.855	0			-11.169	0
	-15.879	1.8393				-6.85	0			-11.164	0
	-15.3509	1.8793				-6.845	0			-11.159	0
	-14.7287	1.9193				-6.84	0			-11.154	0
	-14.014	1.9593				-6.835	0			-11.149	0
	-13.2264	1.9993				-6.83	0			-11.144	0
	-12.3915	2.0392				-6.825	0			-11.139	0
	-11.5231	2.0792				-6.82	0			-11.134	0
	-10.6928	2.1192				-6.815	0			-11.129	0
	-9.91189	2.1592				-6.81	0			-11.124	0
	-9.22801	2.1992				-6.805	0			-11.119	0
	-8.66956	2.2392				-6.8	0			-11.114	0
	-8.25023	2.2792				-6.795	0			-11.109	0
	-8.00379	2.3191				-6.79	0			-11.104	0
	-7.93239	2.3591				-6.785	0			-11.099	0
	-8.04263	2.3991				-6.78	0			-11.094	0
	-8.33641	2.4391				-6.775	0			-11.089	0
	-8.79836	2.4791				-6.77	0			-11.084	0
	-9.41046	2.5191				-6.765	0			-11.079	0
	-10.1548	2.559				-6.76	0			-11.074	0
	-10.9477	2.599				-6.755	0			-11.069	0
	-11.7781	2.639				-6.75	0			-11.064	0
	-12.6136	2.679				-6.745	0			-11.059	0
	-13.4372	2.719				-6.74	0			-11.054	0
	-14.2464	2.759				-6.735	0			-11.049	0
	-15.036	2.799				-6.73	0			-11.044	0
	-15.8033	2.8389				-6.725	0			-11.039	0
	-16.5239	2.8789				-6.72	0			-11.034	0
	-17.1916	2.9189				-6.715	0			-11.029	0
	-17.8006	2.9589				-6.71	0			-11.024	0
	-18.345	2.9989				-6.705	0			-11.019	0
	-18.8222	3.0389				-6.7	0			-11.014	0
	-19.2216	3.0789				-6.695	0			-11.009	0
	-19.5418	3.1188				-6.69	0			-11.004	0
	-19.7812	3.1588				-6.685	0			-10.999	0
	-19.9391	3.1988				-6.68	0			-10.994	0
	-20.0137	3.2388				-6.675	0			-10.989	0
	-20.0019	3.2788				-6.67	0			-10.984	0
	-19.9039	3.3188				-6.665	0			-10.979	0
	-19.7237	3.3587				-6.66	0			-10.974	0
	-19.462	3.3987				-6.655	0			-10.969	0
	-19.1202	3.4387				-6.65	0			-10.964	0
	-18.6996	3.4787				-6.645	0			-10.959	0
	-18.203	3.5187				-6.64	0			-10.954	0
	-17.6412	3.5587				-6.635	0			-10.949	0
	-17.0154	3.5987				-6.63	0			-10.944	0
	-16.3337	3.6386				-6.625	0			-10.939	0
	-15.5993	3.6786				-6.62	0			-10.934	0
	-14.8242	3.7186				-6.615	0			-10.929	0
	-14.0292	3.7586				-6.61	0			-10.924	0
	-13.2157	3.7986				-6.605	0			-10.919	0
	-12.3897	3.8386				-6.6	0			-10.914	0
	-11.5524	3.8786				-6.595	0			-10.909	0
	-10.7312	3.9185				-6.59	0			-10.904	0
	-9.94824	3.9585				-6.585	0			-10.899	0
	-9.22785	3.9985				-6.58	0			-10.894	0
	-8.6513	4.0385				-6.575	0			-10.889	0
	-8.22631	4.0785				-6.57	0			-10.884	0
	-7.97638	4.1185				-6.565	0			-10.879	0
	-7.91064	4.1584				-6.56	0			-10.874	0
	-8.0256	4.1984				-6.555	0			-10.869	0
	-8.31567	4.2384				-6.55	0			-10.864	0
	-8.77509	4.2784				-6.545	0			-10.859	0
	-9.36665	4.3184				-6.54	0			-10.854	0
	-10.0833	4.3584				-6.535	0			-10.849	0
	-10.8801	4.3984				-6.53	0			-10.844	0
	-11.7243	4.4383				-6.525	0			-10.839	0
	-12.5932	4.4783				-6.52	0			-10.834	0
	-13.4184	4.5183				-6.515	0			-10.829	0
	-14.1936	4.5583				-6.51	0			-10.824	0
	-14.888	4.5983				-6.505	0			-10.819	0
	-15.4908	4.6383				-6.5	0			-10.814	0
	-15.9986	4.6783				-6.495	0			-10.809	0
	-16.4064	4.7182				-6.49	0			-10.804	0
	-16.711	4.7582				-6.485	0			-10.799	0
	-16.8952	4.7982				-6.48	0			-10.794	0
	-16.956	4.8382				-6.475	0			-10.789	0
	-16.8912	4.8782				-6.47	0			-10.784	0
	-16.6994	4.9182				-6.465	0			-10.779	0
	-16.3809	4.9582				-6.46	0			-10.774	0
	-15.9368	4.9981				-6.455	0			-10.769	0
	-15.3679	5.0381				-6.45	0			-10.764	0
	-14.6861	5.0781				-6.445	0			-10.759	0
	-13.8951	5.1181				-6.44	0			-10.754	0
	-13.0047	5.1581				-6.435	0			-10.749	0
	-12.0276	5.1981				-6.43	0			-10.744	0
	-10.9695	5.238				-6.425	0			-10.739	0
	-9.8589	5.278				-6.42	0			-10.734	0
	-8.70047	5.318				-6.415	0			-10.729	0
	-7.5234	5.358				-6.41	0			-10.724	0
	-6.34471	5.398				-6.405	0			-10.719	0
	-5.18108	5.438				-6.4	0			-10.714	0
	-4.0728	5.478				-6.395	0			-10.709	0
	-3.02479	5.5179				-6.39	0			-10.704	0
	-2.07228	5.5579				-6.385	0			-10.699	0
	-1.22517	5.5979				-6.38	0			-10.694	0
	-0.49492	5.6379				-6.375	0			-10.689	0
	0.10535	5.6779				-6.37	0			-10.684	0
	0.58322	5.7179				-6.365	0			-10.679	0
	0.97335	5.7579				-6.36	0			-10.674	0
	1.2811	5.7978				-6.355	0			-10.669	0
	1.55172	5.8378				-6.35	0			-10.664	0
	1.80882	5.8778				-6.345	0			-10.659	0
	2.04749	5.9178				-6.34	0			-10.654	0
	2.25696	5.9578				-6.335	0			-10.649	0
	2.43722	5.9978				-6.33	0			-10.644	0
	2.59173	6.0377				-6.325	0			-10.639	0
	2.72136	6.0777				-6.32	0			-10.634	0
	2.82958	6.1177				-6.315	0			-10.629	0
	2.91994	6.1577				-6.31	0			-10.624	0
	2.99289	6.1977				-6.305	0			-10.619	0
	3.05026	6.2377				-6.3	0			-10.614	0
	3.09234	6.2777				-6.295	0			-10.609	0
	3.12145	6.3176				-6.29	0			-10.604	0
	3.13865	6.3576				-6.285	0			-10.599	0
	3.14417	6.3976				-6.28	0			-10.594	0
	3.13838	6.4376				-6.275	0			-10.589	0
	3.12144	6.4776				-6.27	0			-10.584	0
	3.09457	6.5176				-6.265	0			-10.579	0
	3.05805	6.5576				-6.26	0			-10.574	0
	3.01131	6.5975				-6.255	0			-10.569	0
	2.95384	6.6375				-6.25	0			-10.564	0
	2.88573	6.6775				-6.245	0			-10.559	0
	2.80726	6.7175				-6.24	0			-10.554	0
	2.71837	6.7575				-6.235	0			-10.549	0
	2.61711	6.7975				-6.23	0			-10.544	0
	2.50265	6.8375				-6.225	0			-10.539	0
	2.37473	6.8774				-6.22	0			-10.534	0
	2.23289	6.9174				-6.215	0			-10.529	0
	2.07655	6.9574				-6.21	0			-10.524	0
	1.90136	6.9974				-6.205	0			-10.519	0
	1.70647	7.0374				-6.2	0			-10.514	0
	1.49131	7.0774				-6.195	0			-10.509	0
	1.25543	7.1173				-6.19	0			-10.504	0
	0.99624	7.1573				-6.185	0			-10.499	0
	0.70536	7.1973				-6.18	0			-10.494	0
	0.38252	7.2373				-6.175	0			-10.489	0
	0.03512	7.2773				-6.17	0			-10.484	0
	-0.33405	7.3173				-6.165	0			-10.479	0
	-0.71442	7.3573				-6.16	0			-10.474	0
	-1.08935	7.3972				-6.155	0			-10.469	0
	-1.45814	7.4372				-6.15	0			-10.464	0
	-1.81774	7.4772				-6.145	0			-10.459	0
	-2.16757	7.5172				-6.14	0			-10.454	0
	-2.50699	7.5572				-6.135	0			-10.449	0
	-2.83553	7.5972				-6.13	0			-10.444	0
	-3.15295	7.6372				-6.125	0			-10.439	0
	-3.45858	7.6771				-6.12	0			-10.434	0
	-3.75218	7.7171				-6.115	0			-10.429	0
	-4.03094	7.7571				-6.11	0			-10.424	0
	-4.29391	7.7971				-6.105	0			-10.419	0
	-4.53994	7.8371				-6.1	0			-10.414	0
	-4.76744	7.8771				-6.095	0			-10.409	0
	-4.97608	7.917				-6.09	0			-10.404	0
	-5.16419	7.957				-6.085	0			-10.399	0
	-5.33149	7.997				-6.08	0			-10.394	0
	-5.47736	8.037				-6.075	0			-10.389	0
	-5.6014	8.077				-6.07	0			-10.384	0
	-5.70352	8.117				-6.065	0			-10.379	0
	-5.78346	8.157				-6.06	0			-10.374	0
	-5.84118	8.1969				-6.055	0			-10.369	0
	-5.87656	8.2369				-6.05	0			-10.364	0
	-5.88958	8.2769				-6.045	0			-10.359	0
	-5.88031	8.3169				-6.04	0			-10.354	0
	-5.84889	8.3569				-6.035	0			-10.349	0
	-5.79528	8.3969				-6.03	0			-10.344	0
	-5.7194	8.4369				-6.025	0			-10.339	0
	-5.62123	8.4768				-6.02	0			-10.334	0
	-5.50127	8.5168				-6.015	0			-10.329	0
	-5.35982	8.5568				-6.01	0			-10.324	0
	-5.19707	8.5968				-6.005	0			-10.319	0
	-5.01354	8.6368				-6	0			-10.314	0
	-4.8094	8.6768				-5.995	0			-10.309	0
	-4.58664	8.7168				-5.99	0			-10.304	0
	-4.34579	8.7567				-5.985	0			-10.299	0
	-4.08802	8.7967				-5.98	0			-10.294	0
	-3.81466	8.8367				-5.975	0			-10.289	0
	-3.52643	8.8767				-5.97	0			-10.284	0
	-3.22656	8.9167				-5.965	0			-10.279	0
	-2.91542	8.9567				-5.96	0			-10.274	0
	-2.59346	8.9966				-5.955	0			-10.269	0
	-2.26088	9.0366				-5.95	0			-10.264	0
	-1.91828	9.0766				-5.945	0			-10.259	0
	-1.56687	9.1166				-5.94	0			-10.254	0
	-1.20715	9.1566				-5.935	0			-10.249	0
	-0.84321	9.1966				-5.93	0			-10.244	0
	-0.47606	9.2366				-5.925	0			-10.239	0
	-0.12061	9.2765				-5.92	0			-10.234	0
	0.20844	9.3165				-5.915	0			-10.229	0
	0.50969	9.3565				-5.91	0			-10.224	0
	0.77754	9.3965				-5.905	0			-10.219	0
	1.01166	9.4365				-5.9	0			-10.214	0
	1.21851	9.4765				-5.895	0			-10.209	0
	1.40104	9.5165				-5.89	0			-10.204	0
	1.55943	9.5564				-5.885	0			-10.199	0
	1.69404	9.5964				-5.88	0			-10.194	0
	1.80526	9.6364				-5.875	0			-10.189	0
	1.89618	9.6764				-5.87	0			-10.184	0
	1.96748	9.7164				-5.865	0			-10.179	0
	2.0191	9.7564				-5.86	0			-10.174	0
	2.051	9.7963				-5.855	0			-10.169	0
	2.06337	9.8363				-5.85	0			-10.164	0
	2.05692	9.8763				-5.845	0			-10.159	0
	2.03168	9.9163				-5.84	0			-10.154	0
	1.98657	9.9563				-5.835	0			-10.149	0
	1.92114	9.9963				-5.83	0			-10.144	0
	1.83484	10.0363				-5.825	0			-10.139	0
	1.72672	10.0762				-5.82	0			-10.134	0
	1.59638	10.1162				-5.815	0			-10.129	0
	1.44108	10.1562				-5.81	0			-10.124	0
	1.26028	10.1962				-5.805	0			-10.119	0
	1.05211	10.2362				-5.8	0			-10.114	0
	0.81513	10.2762				-5.795	0			-10.109	0
	0.54754	10.3162				-5.79	0			-10.104	0
	0.24364	10.3561				-5.785	0			-10.099	0
	-0.09597	10.3961				-5.78	0			-10.094	0
	-0.45235	10.4361				-5.775	0			-10.089	0
	-0.8185	10.4761				-5.77	0			-10.084	0
	-1.18779	10.5161				-5.765	0			-10.079	0
	-1.55008	10.5561				-5.76	0			-10.074	0
	-1.90505	10.5961				-5.755	0			-10.069	0
	-2.25142	10.636				-5.75	0			-10.064	0
	-2.58896	10.676				-5.745	0			-10.059	0
	-2.91684	10.716				-5.74	0			-10.054	0
	-3.2345	10.756				-5.735	0			-10.049	0
	-3.54122	10.796				-5.73	0			-10.044	0
	-3.83498	10.836				-5.725	0			-10.039	0
	-4.11546	10.8759				-5.72	0			-10.034	0
	-4.37981	10.9159				-5.715	0			-10.029	0
	-4.62708	10.9559				-5.71	0			-10.024	0
	-4.85614	10.9959				-5.705	0			-10.019	0
	-5.06546	11.0359				-5.7	0			-10.014	0
	-5.25476	11.0759				-5.695	0			-10.009	0
	-5.42257	11.1159				-5.69	0			-10.004	0
	-5.56865	11.1558				-5.685	0			-9.99896	0
	-5.69267	11.1958				-5.68	1e-05			-9.99396	0
	-5.79439	11.2358				-5.675	3e-05			-9.98896	0
	-5.87369	11.2758				-5.67	0.00016			-9.98396	0
	-5.93025	11.3158				-5.665	0.00072			-9.97896	0
	-5.96405	11.3558				-5.66	0.0028			-9.97396	0
	-5.97523	11.3958				-5.655	0.00965			-9.96896	0
	-5.96382	11.4357				-5.65	0.02949			-9.96396	0
	-5.92971	11.4757				-5.645	0.07991			-9.95896	0
	-5.87277	11.5157				-5.64	0.1922			-9.95396	0
	-5.79308	11.5557				-5.635	0.4107			-9.94896	0
	-5.69097	11.5957				-5.63	0.7814			-9.94396	0
	-5.56649	11.6357				-5.625	1.327			-9.93896	0
	-5.4199	11.6756				-5.62	2.02			-9.93396	0
	-5.25132	11.7156				-5.615	2.768			-9.92896	0
	-5.06133	11.7556				-5.61	3.435			-9.92396	0
	-4.85124	11.7956				-5.605	3.889			-9.91896	0
	-4.62128	11.8356				-5.6	4.05			-9.91396	0
	-4.37314	11.8756				-5.595	3.918			-9.90896	0
	-4.1073	11.9156				-5.59	3.56			-9.90396	0
	-3.82567	11.9555				-5.585	3.083			-9.89896	0
	-3.53032	11.9955				-5.58	2.594			-9.89396	0
	-3.2217	12.0355				-5.575	2.169			-9.88896	0
	-2.90164	12.0755				-5.57	1.849			-9.88396	0
	-2.57039	12.1155				-5.565	1.651			-9.87896	0
	-2.22897	12.1555				-5.56	1.58			-9.87396	0
	-1.8779	12.1955				-5.555	1.631			-9.86896	0
	-1.5176	12.2354				-5.55	1.771			-9.86396	0
	-1.14893	12.2754				-5.545	1.923			-9.85896	0
	-0.77331	12.3154				-5.54	1.994			-9.85396	0
	-0.40334	12.3554				-5.535	1.913			-9.84896	0
	-0.04207	12.3954				-5.53	1.682			-9.84396	0
	0.29687	12.4354				-5.525	1.373			-9.83896	1e-05
	0.60031	12.4753				-5.52	1.092			-9.83396	1e-05
	0.86961	12.5153				-5.515	0.9233			-9.82896	2e-05
	1.11	12.5553				-5.51	0.8946			-9.82396	3e-05
	1.3221	12.5953				-5.505	0.9772			-9.81896	3e-05
	1.50857	12.6353				-5.5	1.122			-9.81396	4e-05
	1.6706	12.6753				-5.495	1.302			-9.80896	4e-05
	1.80916	12.7153				-5.49	1.543			-9.80396	3e-05
	1.92604	12.7552				-5.485	1.905			-9.79896	3e-05
	2.02151	12.7952				-5.48	2.439			-9.79396	2e-05
	2.09732	12.8352				-5.475	3.135			-9.78896	2e-05
	2.15383	12.8752				-5.47	3.893			-9.78396	1e-05
	2.19134	12.9152				-5.465	4.547			-9.77896	2e-05
	2.21012	12.9552				-5.46	4.923			-9.77396	2e-05
	2.21022	12.9952				-5.455	4.906			-9.76896	4e-05
	2.19187	13.0351				-5.45	4.497			-9.76396	6e-05
	2.15505	13.0751				-5.445	3.813			-9.75896	0.0001
	2.09891	13.1151				-5.44	3.047			-9.75396	0.00014
	2.0231	13.1551				-5.435	2.39			-9.74896	0.00019
	1.92701	13.1951				-5.43	1.962			-9.74396	0.00022
	1.80964	13.2351				-5.425	1.786			-9.73896	0.00024
	1.67058	13.2751				-5.42	1.805			-9.73396	0.00023
	1.50712	13.315				-5.415	1.929			-9.72896	0.0002
	1.31873	13.355				-5.41	2.068			-9.72396	0.00016
	1.10375	13.395				-5.405	2.152			-9.71896	0.00013
	0.86092	13.435				-5.4	2.137			-9.71396	0.00011
	0.58827	13.475				-5.395	2.009			-9.70896	9e-05
	0.27963	13.515				-5.39	1.797			-9.70396	9e-05
	-0.06441	13.5549				-5.385	1.57			-9.69896	9e-05
	-0.42557	13.5949				-5.38	1.413			-9.69396	0.0001
	-0.79723	13.6349				-5.375	1.393			-9.68896	0.0001
	-1.17219	13.6749				-5.37	1.519			-9.68396	0.0001
	-1.53963	13.7149				-5.365	1.735			-9.67896	0.0001
	-1.89922	13.7549				-5.36	1.954			-9.67396	9e-05
	-2.24968	13.7949				-5.355	2.103			-9.66896	8e-05
	-2.59079	13.8348				-5.35	2.167			-9.66396	7e-05
	-2.92177	13.8748				-5.345	2.182			-9.65896	8e-05
	-3.24208	13.9148				-5.34	2.195			-9.65396	0.00011
	-3.55105	13.9548				-5.335	2.21			-9.64896	0.00018
	-3.84671	13.9948				-5.33	2.182			-9.64396	0.00028
	-4.12877	14.0348				-5.325	2.046			-9.63896	0.00042
	-4.39441	14.0748				-5.32	1.781			-9.63396	0.00058
	-4.64271	14.1147				-5.315	1.425			-9.62896	0.00073
	-4.87252	14.1547				-5.31	1.071			-9.62396	0.00083
	-5.08229	14.1947				-5.305	0.8095			-9.61896	0.00085
	-5.27177	14.2347				-5.3	0.6971			-9.61396	0.00079
	-5.4396	14.2747				-5.295	0.7335			-9.60896	0.00067
	-5.58558	14.3147				-5.29	0.8738			-9.60396	0.00054
	-5.7092	14.3546				-5.285	1.054			-9.59896	0.00042
	-5.81016	14.3946				-5.28	1.223			-9.59396	0.00033
	-5.88838	14.4346				-5.275	1.361			-9.58896	0.00028
	-5.94371	14.4746				-5.27	1.489			-9.58396	0.00025
	-5.97613	14.5146				-5.265	1.656			-9.57896	0.00024
	-5.98555	14.5546				-5.26	1.923			-9.57396	0.00025
	-5.97196	14.5946				-5.255	2.347			-9.56896	0.00027
	-5.93541	14.6345				-5.25	2.959			-9.56396	0.0003
	-5.87599	14.6745				-5.245	3.733			-9.55896	0.00033
	-5.79371	14.7145				-5.24	4.567			-9.55396	0.00036
	-5.68868	14.7545				-5.235	5.293			-9.54896	0.00037
	-5.56095	14.7945				-5.23	5.741			-9.54396	0.00037
	-5.41108	14.8345				-5.225	5.804			-9.53896	0.00036
	-5.23941	14.8745				-5.22	5.489			-9.53396	0.00035
	-5.04641	14.9144				-5.215	4.914			-9.52896	0.00034
	-4.83315	14.9544				-5.21	4.262			-9.52396	0.00035
	-4.59989	14.9944				-5.205	3.708			-9.51896	0.00041
	-4.34881	15.0344				-5.2	3.355			-9.51396	0.00053
	-4.08049	15.0744				-5.195	3.208			-9.50896	0.00076
	-3.7967	15.1144				-5.19	3.189			-9.50396	0.0011
	-3.49934	15.1544				-5.185	3.194			-9.49896	0.00154
	-3.18902	15.1943				-5.18	3.144			-9.49396	0.00202
	-2.86831	15.2343				-5.175	3.015			-9.48896	0.00242
	-2.53753	15.2743				-5.17	2.826			-9.48396	0.00264
	-2.19736	15.3143				-5.165	2.608			-9.47896	0.00261
	-1.84814	15.3543				-5.16	2.384			-9.47396	0.00237
	-1.49051	15.3943				-5.155	2.162			-9.46896	0.00199
	-1.12579	15.4342				-5.15	1.954			-9.46396	0.00159
	-0.75529	15.4742				-5.145	1.772			-9.45896	0.00125
	-0.39032	15.5142				-5.14	1.634			-9.45396	0.00101
	-0.03355	15.5542				-5.135	1.553			-9.44896	0.00085
	0.30037	15.5942				-5.13	1.541			-9.44396	0.00077
	0.59767	15.6342				-5.125	1.629			-9.43896	0.00072
	0.85969	15.6742				-5.12	1.862			-9.43396	0.00069
	1.09157	15.7141				-5.115	2.268			-9.42896	0.00066
	1.2939	15.7541				-5.11	2.821			-9.42396	0.00063
	1.46913	15.7941				-5.105	3.414			-9.41896	0.00061
	1.61834	15.8341				-5.1	3.89			-9.41396	0.00063
	1.74274	15.8741				-5.095	4.102			-9.40896	0.00073
	1.84456	15.9141				-5.09	3.984			-9.40396	0.00097
	1.92399	15.9541				-5.085	3.573			-9.39896	0.00143
	1.98213	15.994				-5.08	2.987			-9.39396	0.00214
	2.01922	16.034				-5.075	2.378			-9.38896	0.00311
	2.03609	16.074				-5.07	1.892			-9.38396	0.00419
	2.03344	16.114				-5.065	1.622			-9.37896	0.00516
	2.01102	16.154				-5.06	1.585			-9.37396	0.00576
	1.96804	16.194				-5.055	1.713			-9.36896	0.00583
	1.90442	16.2339				-5.05	1.88			-9.36396	0.00541
	1.82017	16.2739				-5.045	1.96			-9.35896	0.00466
	1.71529	16.3139				-5.04	1.885			-9.35396	0.00383
	1.58814	16.3539				-5.035	1.683			-9.34896	0.00314
	1.43605	16.3939				-5.03	1.456			-9.34396	0.00273
	1.25893	16.4339				-5.025	1.317			-9.33896	0.00264
	1.05643	16.4739				-5.02	1.337			-9.33396	0.0029
	0.82846	16.5138				-5.015	1.506			-9.32896	0.00347
	0.5688	16.5538				-5.01	1.762			-9.32396	0.00425
	0.27283	16.5938				-5.005	2.028			-9.31896	0.00508
	-0.05546	16.6338				-5	2.266			-9.31396	0.00574
	-0.40388	16.6738				-4.995	2.489			-9.30896	0.00606
	-0.7705	16.7138				-4.99	2.732			-9.30396	0.00596
	-1.13735	16.7538				-4.985	3.008			-9.29896	0.00551
	-1.49803	16.7937				-4.98	3.275			-9.29396	0.00489
	-1.85135	16.8337				-4.975	3.466			-9.28896	0.00426
	-2.19559	16.8737				-4.97	3.538			-9.28396	0.00374
	-2.5305	16.9137				-4.965	3.51			-9.27896	0.00337
	-2.85481	16.9537				-4.96	3.44			-9.27396	0.00312
	-3.16828	16.9937				-4.955	3.374			-9.26896	0.00292
	-3.47009	17.0337				-4.95	3.3			-9.26396	0.00274
	-3.75968	17.0736				-4.945	3.176			-9.25896	0.00257
	-4.03599	17.1136				-4.94	2.984			-9.25396	0.00245
	-4.29607	17.1536				-4.935	2.773			-9.24896	0.00242
	-4.53963	17.1936				-4.93	2.65			-9.24396	0.00249
	-4.76486	17.2336				-4.925	2.716			-9.23896	0.00266
	-4.97117	17.2736				-4.92	3.007			-9.23396	0.00289
	-5.15758	17.3135				-4.915	3.468			-9.22896	0.00315
	-5.32276	17.3535				-4.91	3.98			-9.22396	0.00345
	-5.4666	17.3935				-4.905	4.412			-9.21896	0.00375
	-5.58858	17.4335				-4.9	4.666			-9.21396	0.00399
	-5.6886	17.4735				-4.895	4.701			-9.20896	0.00408
	-5.76634	17.5135				-4.89	4.532			-9.20396	0.00396
	-5.82159	17.5535				-4.885	4.212			-9.19896	0.00362
	-5.85436	17.5934				-4.88	3.817			-9.19396	0.00315
	-5.86466	17.6334				-4.875	3.425			-9.18896	0.00266
	-5.85249	17.6734				-4.87	3.098			-9.18396	0.00229
	-5.81783	17.7134				-4.865	2.867			-9.17896	0.0021
	-5.76067	17.7534				-4.86	2.734			-9.17396	0.00208
	-5.68106	17.7934				-4.855	2.696			-9.16896	0.0022
	-5.57909	17.8334				-4.85	2.781			-9.16396	0.00239
	-5.45485	17.8733				-4.845	3.05			-9.15896	0.0026
	-5.30888	17.9133				-4.84	3.554			-9.15396	0.00278
	-5.14123	17.9533				-4.835	4.259			-9.14896	0.00287
	-4.95274	17.9933				-4.83	5			-9.14396	0.00286
	-4.74382	18.0333				-4.825	5.517			-9.13896	0.00273
	-4.51532	18.0733				-4.82	5.578			-9.13396	0.0025
	-4.26908	18.1132				-4.815	5.103			-9.12896	0.00224
	-4.00539	18.1532				-4.81	4.218			-9.12396	0.00198
	-3.72655	18.1932				-4.805	3.186			-9.11896	0.00178
	-3.43313	18.2332				-4.8	2.285			-9.11396	0.00164
	-3.127	18.2732				-4.795	1.696			-9.10896	0.00157
	-2.81006	18.3132				-4.79	1.466			-9.10396	0.00154
	-2.48244	18.3532				-4.785	1.536			-9.09896	0.00154
	-2.1446	18.3931				-4.78	1.802			-9.09396	0.00157
	-1.79663	18.4331				-4.775	2.158			-9.08896	0.00164
	-1.43933	18.4731				-4.77	2.512			-9.08396	0.00177
	-1.07308	18.5131				-4.765	2.794			-9.07896	0.00196
	-0.70047	18.5531				-4.76	2.961			-9.07396	0.00223
	-0.32666	18.5931				-4.755	3.01			-9.06896	0.00257
	0.04564	18.6331				-4.75	2.982			-9.06396	0.00293
	0.39455	18.673				-4.745	2.952			-9.05896	0.00333
	0.71503	18.713				-4.74	2.985			-9.05396	0.00376
	1.0065	18.753				-4.735	3.108			-9.04896	0.00422
	1.26845	18.793				-4.73	3.291			-9.04396	0.00467
	1.50272	18.833				-4.725	3.474			-9.03896	0.00499
	1.71616	18.873				-4.72	3.612			-9.03396	0.00506
	1.90948	18.913				-4.715	3.704			-9.02896	0.00481
	2.08426	18.9529				-4.71	3.789			-9.02396	0.00427
	2.24118	18.9929				-4.705	3.914			-9.01896	0.00359
	2.38216	19.0329				-4.7	4.1			-9.01396	0.00294
	2.51062	19.0729				-4.695	4.335			-9.00896	0.00245
	2.62681	19.1129				-4.69	4.579			-9.00396	0.00216
	2.73201	19.1529				-4.685	4.782			-8.99896	0.00204
	2.8265	19.1928				-4.68	4.88			-8.99396	0.00202
	2.91198	19.2328				-4.675	4.813			-8.98896	0.00202
	2.98987	19.2728				-4.67	4.539			-8.98396	0.00201
	3.06037	19.3128				-4.665	4.069			-8.97896	0.00198
	3.12424	19.3528				-4.66	3.47			-8.97396	0.00193
	3.1816	19.3928				-4.655	2.839			-8.96896	0.0019
	3.2338	19.4328				-4.65	2.276			-8.96396	0.0019
	3.28138	19.4727				-4.645	1.847			-8.95896	0.00193
	3.32454	19.5127				-4.64	1.57			-8.95396	0.002
	3.36361	19.5527				-4.635	1.427			-8.94896	0.00211
	3.39875	19.5927				-4.63	1.369			-8.94396	0.00226
	3.43092	19.6327				-4.625	1.35			-8.93896	0.00244
	3.46029	19.6727				-4.62	1.339			-8.93396	0.00266
	3.48703	19.7127				-4.615	1.322			-8.92896	0.00293
	3.51122	19.7526				-4.61	1.285			-8.92396	0.00327
	3.53309	19.7926				-4.605	1.213			-8.91896	0.00365
	3.55324	19.8326				-4.6	1.085			-8.91396	0.00402
	3.57172	19.8726				-4.595	0.9003			-8.90896	0.0043
	3.58859	19.9126				-4.59	0.6822			-8.90396	0.0044
	3.60387	19.9526				-4.585	0.4715			-8.89896	0.00427
	3.61781	19.9925				-4.58	0.3097			-8.89396	0.00395
	3.63075	20.0325				-4.575	0.2283			-8.88896	0.00352
	3.64271	20.0725				-4.57	0.2485			-8.88396	0.00307
	3.65367	20.1125				-4.565	0.3866			-8.87896	0.00267
	3.66362	20.1525				-4.56	0.6506			-8.87396	0.00234
	3.67283	20.1925				-4.555	1.027			-8.86896	0.00209
	3.68147	20.2325				-4.55	1.467			-8.86396	0.00194
	3.68951	20.2724				-4.545	1.888			-8.85896	0.00189
	3.69691	20.3124				-4.54	2.199			-8.85396	0.00195
	3.7037	20.3524				-4.535	2.336			-8.84896	0.0021
	3.71008	20.3924				-4.53	2.281			-8.84396	0.00231
	3.71615	20.4324				-4.525	2.064			-8.83896	0.00252
	3.72185	20.4724				-4.52	1.741			-8.83396	0.00274
	3.72714	20.5124				-4.515	1.382			-8.82896	0.00296
	3.73204	20.5523				-4.51	1.058			-8.82396	0.00327
	3.73675	20.5923				-4.505	0.837			-8.81896	0.00384
	3.74127	20.6323				-4.5	0.7748			-8.81396	0.00485
	3.74556	20.6723				-4.495	0.8974			-8.80896	0.00647
	3.74956	20.7123				-4.49	1.187			-8.80396	0.00871
	3.75335	20.7523				-4.485	1.577			-8.79896	0.01131
	3.75705	20.7922				-4.48	1.977			-8.79396	0.01373
	3.76065	20.8322				-4.475	2.306			-8.78896	0.01532
	3.76409	20.8722				-4.47	2.52			-8.78396	0.01559
	3.76734	20.9122				-4.465	2.622			-8.77896	0.01445
	3.77048	20.9522				-4.46	2.624			-8.77396	0.01229
	3.77359	20.9922				-4.455	2.523			-8.76896	0.00973
	3.77664	21.0322				-4.45	2.307			-8.76396	0.00739
	3.77957	21.0721				-4.445	1.98			-8.75896	0.00567
	3.78237	21.1121				-4.44	1.594			-8.75396	0.00472
	3.78513	21.1521				-4.435	1.235			-8.74896	0.00451
	3.78787	21.1921				-4.43	0.9862			-8.74396	0.00502
	3.79058	21.2321				-4.425	0.8815			-8.73896	0.00627
	3.79321	21.2721				-4.42	0.893			-8.73396	0.00833
	3.79575	21.3121				-4.415	0.9473			-8.72896	0.01121
	3.79827	21.352				-4.41	0.9653			-8.72396	0.01465
	3.8008	21.392				-4.405	0.8995			-8.71896	0.018
	3.8033	21.432				-4.4	0.7502			-8.71396	0.02043
	3.80573	21.472				-4.395	0.5555			-8.70896	0.02112
	3.80812	21.512				-4.39	0.3641			-8.70396	0.01973
	3.81051	21.552				-4.385	0.211			-8.69896	0.0166
	3.81291	21.592				-4.38	0.1081			-8.69396	0.01257
	3.81528	21.6319				-4.375	0.04893			-8.68896	0.00861
	3.81761	21.6719				-4.37	0.01957			-8.68396	0.0054
	3.81991	21.7119				-4.365	0.00692			-8.67896	0.00323
	3.82221	21.7519				-4.36	0.00216			-8.67396	0.002
	3.82452	21.7919				-4.355	0.0006			-8.66896	0.00145
	3.8268	21.8319				-4.35	0.00015			-8.66396	0.0013
	3.82905	21.8718				-4.345	3e-05			-8.65896	0.00132
	3.83128	21.9118				-4.34	2e-05			-8.65396	0.00136
	3.83353	21.9518				-4.335	8e-05			-8.64896	0.00134
	3.83578	21.9918				-4.33	0.00033			-8.64396	0.00122
	3.838	22.0318				-4.325	0.00125			-8.63896	0.00103
	3.84021	22.0718				-4.32	0.00422			-8.63396	0.00082
	3.84241	22.1118				-4.315	0.01262			-8.62896	0.00065
	3.84462	22.1517				-4.31	0.03329			-8.62396	0.00056
	3.84682	22.1917				-4.305	0.07764			-8.61896	0.00055
	3.84901	22.2317				-4.3	0.16			-8.61396	0.0006
	3.85118	22.2717				-4.295	0.2912			-8.60896	0.00069
	3.85335	22.3117				-4.29	0.4685			-8.60396	0.00076
	3.85552	22.3517				-4.285	0.666			-8.59896	0.0008
	3.85769	22.3917				-4.28	0.8367			-8.59396	0.00083
	3.85984	22.4316				-4.275	0.9288			-8.58896	0.00085
	3.86199	22.4716				-4.27	0.9113			-8.58396	0.0009
	3.86413	22.5116				-4.265	0.7912			-8.57896	0.00098
	3.86627	22.5516				-4.26	0.6103			-8.57396	0.00105
	3.8684	22.5916				-4.255	0.4258			-8.56896	0.00108
	3.87053	22.6316				-4.25	0.2872			-8.56396	0.00104
	3.87266	22.6715				-4.245	0.2252			-8.55896	0.00092
	3.87478	22.7115				-4.24	0.2515			-8.55396	0.00075
	3.87689	22.7515				-4.235	0.3611			-8.54896	0.00056
	3.87901	22.7915				-4.23	0.5318			-8.54396	0.00039
	3.88112	22.8315				-4.225	0.7211			-8.53896	0.00026
	3.88323	22.8715				-4.22	0.8726			-8.53396	0.00018
	3.88533	22.9115				-4.215	0.9354			-8.52896	0.00014
	3.88741	22.9514				-4.21	0.8865			-8.52396	0.00011
	3.8895	22.9914				-4.205	0.7425			-8.51896	0.0001
	3.89159	23.0314				-4.2	0.5495			-8.51396	9e-05
	3.89367	23.0714				-4.195	0.3594			-8.50896	9e-05
	3.89574	23.1114				-4.19	0.2077			-8.50396	8e-05
	3.8978	23.1514				-4.185	0.1061			-8.49896	9e-05
	3.89987	23.1914				-4.18	0.04788			-8.49396	9e-05
	3.90195	23.2313				-4.175	0.01923			-8.48896	9e-05
	3.90402	23.2713				-4.17	0.00736			-8.48396	9e-05
	3.90606	23.3113				-4.165	0.00438			-8.47896	9e-05
	3.90811	23.3513				-4.16	0.00786			-8.47396	9e-05
	3.91016	23.3913				-4.155	0.02063			-8.46896	9e-05
	3.91223	23.4313				-4.15	0.05096			-8.46396	9e-05
	3.91427	23.4713				-4.145	0.1119			-8.45896	9e-05
	3.91628	23.5112				-4.14	0.2171			-8.45396	9e-05
	3.91831	23.5512				-4.135	0.3723			-8.44896	9e-05
	3.92035	23.5912				-4.13	0.5641			-8.44396	9e-05
	3.92239	23.6312				-4.125	0.7553			-8.43896	9e-05
	3.92441	23.6712				-4.12	0.8936			-8.43396	9e-05
	3.9264	23.7112				-4.115	0.9343			-8.42896	9e-05
	3.92841	23.7511				-4.11	0.8632			-8.42396	9e-05
	3.93044	23.7911				-4.105	0.7046			-8.41896	9e-05
	3.93245	23.8311				-4.1	0.5083			-8.41396	9e-05
	3.93444	23.8711				-4.095	0.324			-8.40896	9e-05
	3.93642	23.9111				-4.09	0.1825			-8.40396	9e-05
	3.93842	23.9511				-4.085	0.09082			-8.39896	8e-05
	3.94045	23.9911				-4.08	0.03994			-8.39396	8e-05
	3.94244	24.031				-4.075	0.01552			-8.38896	8e-05
	3.94441	24.071				-4.07	0.00533			-8.38396	8e-05
	3.94637	24.111				-4.065	0.00162			-8.37896	7e-05
	3.94836	24.151				-4.06	0.00043			-8.37396	6e-05
	3.95035	24.191				-4.055	0.0001			-8.36896	5e-05
	3.95232	24.231				-4.05	2e-05			-8.36396	4e-05
	3.95426	24.271				-4.045	0			-8.35896	3e-05
	3.95621	24.3109				-4.04	0			-8.35396	2e-05
	3.95818	24.3509				-4.035	0			-8.34896	1e-05
	3.96017	24.3909				-4.03	0			-8.34396	1e-05
	3.96212	24.4309				-4.025	1e-05			-8.33896	0
	3.96404	24.4709				-4.02	7e-05			-8.33396	0
	3.96598	24.5109				-4.015	0.00034			-8.32896	0
	3.96795	24.5508				-4.01	0.00146			-8.32396	0
	3.96992	24.5908				-4.005	0.00552			-8.31896	0
	3.97184	24.6308				-4	0.01851			-8.31396	0
	3.97374	24.6708				-3.995	0.05518			-8.30896	0
	3.97567	24.7108				-3.99	0.1463			-8.30396	0
	3.97763	24.7508				-3.985	0.3454			-8.29896	0
	3.97957	24.7908				-3.98	0.7278			-8.29396	0
	3.98147	24.8307				-3.975	1.372			-8.28896	0
	3.98335	24.8707				-3.97	2.322			-8.28396	0
	3.98527	24.9107				-3.965	3.537			-8.27896	0
	3.98722	24.9507				-3.96	4.876			-8.27396	0
	3.98914	24.9907				-3.955	6.113			-8.26896	0
	3.99101	25.0307				-3.95	7.022			-8.26396	0
	3.99289	25.0707				-3.945	7.461			-8.25896	0
	3.99481	25.1106				-3.94	7.426			-8.25396	0
	3.99675	25.1506				-3.935	7.05			-8.24896	0
	3.99865	25.1906				-3.93	6.527			-8.24396	0
	4.0005	25.2306				-3.925	6.034			-8.23896	0
	4.00237	25.2706				-3.92	5.669			-8.23396	0
	4.00428	25.3106				-3.915	5.437			-8.22896	0
	4.00619	25.3506				-3.91	5.286			-8.22396	0
	4.00806	25.3905				-3.905	5.155			-8.21896	0
	4.00988	25.4305				-3.9	5.01			-8.21396	0
	4.01174	25.4705				-3.895	4.84			-8.20896	0
	4.01364	25.5105				-3.89	4.632			-8.20396	0
	4.01554	25.5505				-3.885	4.36			-8.19896	0
	4.01738	25.5905				-3.88	4.004			-8.19396	0
	4.0192	25.6304				-3.875	3.583			-8.18896	0
	4.02106	25.6704				-3.87	3.168			-8.18396	0
	4.02296	25.7104				-3.865	2.86			-8.17896	0
	4.02483	25.7504				-3.86	2.74			-8.17396	0
	4.02664	25.7904				-3.855	2.837			-8.16896	0
	4.02845	25.8304				-3.85	3.108			-8.16396	0
	4.03029	25.8704				-3.845	3.46			-8.15896	0
	4.03218	25.9103				-3.84	3.782			-8.15396	0
	4.03402	25.9503				-3.835	3.995			-8.14896	0
	4.0358	25.9903				-3.83	4.079			-8.14396	0
	4.03759	26.0303				-3.825	4.068			-8.13896	0
	4.03943	26.0703				-3.82	4.024			-8.13396	0
	4.0413	26.1103				-3.815	4.004			-8.12896	0
	4.04311	26.1503				-3.81	4.039			-8.12396	0
	4.04487	26.1902				-3.805	4.134			-8.11896	0
	4.04666	26.2302				-3.8	4.278			-8.11396	0
	4.0485	26.2702				-3.795	4.466			-8.10896	0
	4.05035	26.3102				-3.79	4.708			-8.10396	0
	4.05213	26.3502				-3.785	5.02			-8.09896	0
	4.05387	26.3902				-3.78	5.387			-8.09396	1e-05
	4.05565	26.4301				-3.775	5.745			-8.08896	3e-05
	4.05748	26.4701				-3.77	5.984			-8.08396	0.00018
	4.05929	26.5101				-3.765	5.987			-8.07896	0.0008
	4.06104	26.5501				-3.76	5.688			-8.07396	0.00322
	4.06275	26.5901				-3.755	5.101			-8.06896	0.01147
	4.06452	26.6301				-3.75	4.313			-8.06396	0.03614
	4.06634	26.6701				-3.745	3.444			-8.05896	0.10062
	4.06812	26.71				-3.74	2.607			-8.05396	0.24773
	4.06983	26.75				-3.735	1.885			-8.04896	0.53945
	4.07154	26.79				-3.73	1.333			-8.04396	1.03907
	4.0733	26.83				-3.725	0.9796			-8.03896	1.77209
	4.07511	26.87				-3.72	0.8317			-8.03396	2.67764
	4.07685	26.91				-3.715	0.8708			-8.02896	3.59035
	4.07853	26.95				-3.71	1.053			-8.02396	4.28332
	4.08023	26.9899				-3.705	1.318			-8.01896	4.56709
	4.08198	27.0299				-3.7	1.611			-8.01396	4.39062
	4.08376	27.0699				-3.695	1.891			-8.00896	3.87263
	4.08546	27.1099				-3.69	2.147			-8.00396	3.23895
	4.08711	27.1499				-3.685	2.378			-7.99896	2.72246
	4.08878	27.1899				-3.68	2.588			-7.99396	2.4662
	4.09052	27.2298				-3.675	2.764			-7.98896	2.48498
	4.09226	27.2698				-3.67	2.876			-7.98396	2.67785
	4.09393	27.3098				-3.665	2.882			-7.97896	2.88129
	4.09555	27.3498				-3.66	2.753			-7.97396	2.94389
	4.09722	27.3898				-3.655	2.497			-7.96896	2.79264
	4.09895	27.4298				-3.65	2.182			-7.96396	2.45555
	4.10066	27.4698				-3.645	1.923			-7.95896	2.0302
	4.10229	27.5097				-3.64	1.831			-7.95396	1.62398
	4.10388	27.5497				-3.635	1.958			-7.94896	1.30453
	4.10554	27.5897				-3.63	2.258			-7.94396	1.08618
	4.10724	27.6297				-3.625	2.589			-7.93896	0.94785
	4.1089	27.6697				-3.62	2.781			-7.93396	0.85924
	4.11047	27.7097				-3.615	2.714			-7.92896	0.79892
	4.11204	27.7497				-3.61	2.374			-7.92396	0.75817
	4.11368	27.7896				-3.605	1.854			-7.91896	0.73536
	4.11535	27.8296				-3.6	1.297			-7.91396	0.72622
	4.11696	27.8696				-3.595	0.8318			-7.90896	0.71766
	4.1185	27.9096				-3.59	0.5382			-7.90396	0.69049
	4.12005	27.9496				-3.585	0.4451			-7.89896	0.62907
	4.12167	27.9896				-3.58	0.553			-7.89396	0.53186
	4.12331	28.0296				-3.575	0.8462			-7.88896	0.41509
	4.12487	28.0695				-3.57	1.286			-7.88396	0.30675
	4.12636	28.1095				-3.565	1.799			-7.87896	0.23517
	4.12789	28.1495				-3.56	2.27			-7.87396	0.22023
	4.12949	28.1895				-3.555	2.576			-7.86896	0.26963
	4.13106	28.2295				-3.55	2.625			-7.86396	0.38043
	4.13256	28.2695				-3.545	2.406			-7.85896	0.54457
	4.134	28.3094				-3.54	1.996			-7.85396	0.75666
	4.13549	28.3494				-3.535	1.529			-7.84896	1.01838
	4.13704	28.3894				-3.53	1.154			-7.84396	1.33175
	4.13854	28.4294				-3.525	0.988			-7.83896	1.68117
	4.13996	28.4694				-3.52	1.096			-7.83396	2.01689
	4.14135	28.5094				-3.515	1.485			-7.82896	2.26266
	4.1428	28.5494				-3.51	2.107			-7.82396	2.34763
	4.1443	28.5893				-3.505	2.851			-7.81896	2.24841
	4.14573	28.6293				-3.5	3.559			-7.81396	2.00164
	4.14706	28.6693				-3.495	4.054			-7.80896	1.68216
	4.14839	28.7093				-3.49	4.195			-7.80396	1.36246
	4.14977	28.7493				-3.485	3.933			-7.79896	1.08414
	4.15116	28.7893				-3.48	3.333			-7.79396	0.85702
	4.15246	28.8293				-3.475	2.557			-7.78896	0.67503
	4.15366	28.8692				-3.47	1.793			-7.78396	0.53302
	4.15487	28.9092				-3.465	1.202			-7.77896	0.43239
	4.15613	28.9492				-3.46	0.878			-7.77396	0.37636
	4.15736	28.9892				-3.455	0.8514			-7.76896	0.3633
	4.15849	29.0292				-3.45	1.099			-7.76396	0.38359
	4.15952	29.0692				-3.445	1.551			-7.75896	0.42101
	4.16056	29.1091				-3.44	2.099			-7.75396	0.4589
	4.16163	29.1491				-3.435	2.616			-7.74896	0.48528
	4.16262	29.1891				-3.43	2.996			-7.74396	0.4967
	4.16348	29.2291				-3.425	3.195			-7.73896	0.49633
	4.16424	29.2691				-3.42	3.238			-7.73396	0.4889
	4.16497	29.3091				-3.415	3.191			-7.72896	0.47648
	4.1657	29.3491				-3.41	3.103			-7.72396	0.46028
	4.16628	29.389				-3.405	2.985			-7.71896	0.44514
	4.16667	29.429				-3.4	2.816			-7.71396	0.44279
	4.16694	29.469				-3.395	2.578			-7.70896	0.4654
	4.16714	29.509				-3.39	2.277			-7.70396	0.51519
	4.16724	29.549				-3.385	1.951			-7.69896	0.57848
	4.16712	29.589				-3.38	1.653			-7.69396	0.6312
	4.16674	29.629				-3.375	1.43			-7.68896	0.65099
	4.16616	29.6689				-3.37	1.301			-7.68396	0.62996
	4.16542	29.7089				-3.365	1.258			-7.67896	0.57919
	4.16445	29.7489				-3.36	1.271			-7.67396	0.52255
	4.16309	29.7889				-3.355	1.325			-7.66896	0.48529
	4.16134	29.8289				-3.35	1.434			-7.66396	0.48235
	4.15923	29.8689				-3.345	1.63			-7.65896	0.51204
	4.15675	29.9089				-3.34	1.93			-7.65396	0.55876
	4.15379	29.9488				-3.335	2.309			-7.64896	0.60422
	4.15017	29.9888				-3.33	2.691			-7.64396	0.6457
	4.14591	30.0288				-3.325	2.984			-7.63896	0.70985
	4.14095	30.0688				-3.32	3.11			-7.63396	0.85917
	4.13528	30.1088				-3.315	3.025			-7.62896	1.18132
	4.12866	30.1488				-3.31	2.73			-7.62396	1.75726
	4.12093	30.1887				-3.305	2.272			-7.61896	2.60677
	4.11204	30.2287				-3.3	1.728			-7.61396	3.63421
	4.10183	30.2687				-3.295	1.193			-7.60896	4.62521
	4.09024	30.3087				-3.29	0.7425			-7.60396	5.30897
	4.07683	30.3487				-3.285	0.4166			-7.59896	5.49139
	4.06146	30.3887				-3.28	0.2162			-7.59396	5.14583
	4.04388	30.4287				-3.275	0.1207			-7.58896	4.42252
	4.02381	30.4686				-3.27	0.1079			-7.58396	3.55947
	4.00105	30.5086				-3.265	0.1669			-7.57896	2.76144
	3.97485	30.5486				-3.26	0.2993			-7.57396	2.13665
	3.94508	30.5886				-3.255	0.5093			-7.56896	1.69753
						-3.25	0.7938			-7.56396	1.40666
						-3.245	1.138			-7.55896	1.21825
						-3.24	1.517			-7.55396	1.10002
						-3.235	1.904			-7.54896	1.03567
						-3.23	2.272			-7.54396	1.01662
						-3.225	2.592			-7.53896	1.03399
						-3.22	2.838			-7.53396	1.0745
						-3.215	2.989			-7.52896	1.12197
						-3.21	3.04			-7.52396	1.16359
						-3.205	2.996			-7.51896	1.19379
						-3.2	2.878			-7.51396	1.21497
						-3.195	2.723			-7.50896	1.23345
						-3.19	2.596			-7.50396	1.25009
						-3.185	2.577			-7.49896	1.25621
						-3.18	2.728			-7.49396	1.23472
						-3.175	3.051			-7.48896	1.16921
						-3.17	3.473			-7.48396	1.05686
						-3.165	3.859			-7.47896	0.91442
						-3.16	4.061			-7.47396	0.77341
						-3.155	3.97			-7.46896	0.66438
						-3.15	3.57			-7.46396	0.60058
						-3.145	2.942			-7.45896	0.57225
						-3.14	2.24			-7.45396	0.55456
						-3.135	1.627			-7.44896	0.52619
						-3.13	1.214			-7.44396	0.48267
						-3.125	1.026			-7.43896	0.43743
						-3.12	1.013			-7.43396	0.40917
						-3.115	1.09			-7.42896	0.40783
						-3.11	1.18			-7.42396	0.42832
						-3.105	1.241			-7.41896	0.45916
						-3.1	1.269			-7.41396	0.49531
						-3.095	1.273			-7.40896	0.54548
						-3.09	1.258			-7.40396	0.62498
						-3.085	1.236			-7.39896	0.74084
						-3.08	1.25			-7.39396	0.88065
						-3.075	1.388			-7.38896	1.01823
						-3.07	1.773			-7.38396	1.13088
						-3.065	2.505			-7.37896	1.21255
						-3.06	3.596			-7.37396	1.27209
						-3.055	4.939			-7.36896	1.31825
						-3.05	6.335			-7.36396	1.34266
						-3.045	7.583			-7.35896	1.32159
						-3.04	8.557			-7.35396	1.23362
						-3.035	9.238			-7.34896	1.07966
						-3.03	9.662			-7.34396	0.89053
						-3.025	9.847			-7.33896	0.71228
						-3.02	9.762			-7.33396	0.58239
						-3.015	9.366			-7.32896	0.51317
						-3.01	8.676			-7.32396	0.48932
						-3.005	7.801			-7.31896	0.48406
						-3	6.906			-7.31396	0.47723
						-2.995	6.128			-7.30896	0.4681
						-2.99	5.522			-7.30396	0.47294
						-2.985	5.06			-7.29896	0.51229
						-2.98	4.685			-7.29396	0.59399
						-2.975	4.37			-7.28896	0.70665
						-2.97	4.127			-7.28396	0.82554
						-2.965	3.983			-7.27896	0.92952
						-2.96	3.935			-7.27396	1.01592
						-2.955	3.928			-7.26896	1.1028
						-2.95	3.878			-7.26396	1.21567
						-2.945	3.714			-7.25896	1.36813
						-2.94	3.415			-7.25396	1.55011
						-2.935	3.031			-7.24896	1.73029
						-2.93	2.655			-7.24396	1.86944
						-2.925	2.381			-7.23896	1.93662
						-2.92	2.27			-7.23396	1.92035
						-2.915	2.327			-7.22896	1.83328
						-2.91	2.523			-7.22396	1.7071
						-2.905	2.81			-7.21896	1.58186
						-2.9	3.136			-7.21396	1.48887
						-2.895	3.436			-7.20896	1.43868
						-2.89	3.639			-7.20396	1.42263
						-2.885	3.685			-7.19896	1.42457
						-2.88	3.55			-7.19396	1.4327
						-2.875	3.268			-7.18896	1.44531
						-2.87	2.915			-7.18396	1.46657
						-2.865	2.573			-7.17896	1.50352
						-2.86	2.304			-7.17396	1.56094
						-2.855	2.137			-7.16896	1.63718
						-2.85	2.082			-7.16396	1.72237
						-2.845	2.137			-7.15896	1.80168
						-2.84	2.302			-7.15396	1.86253
						-2.835	2.56			-7.14896	1.90593
						-2.83	2.877			-7.14396	1.95491
						-2.825	3.193			-7.13896	2.06034
						-2.82	3.449			-7.13396	2.29736
						-2.815	3.603			-7.12896	2.74202
						-2.81	3.655			-7.12396	3.41914
						-2.805	3.635			-7.11896	4.24868
						-2.8	3.594			-7.11396	5.03393
						-2.795	3.586			-7.10896	5.53026
						-2.79	3.649			-7.10396	5.5595
						-2.785	3.783			-7.09896	5.11045
						-2.78	3.94			-7.09396	4.33828
						-2.775	4.042			-7.08896	3.46887
						-2.77	4.025			-7.08396	2.69003
						-2.765	3.881			-7.07896	2.07968
						-2.76	3.664			-7.07396	1.62744
						-2.755	3.457			-7.06896	1.28737
						-2.75	3.316			-7.06396	1.02319
						-2.745	3.235			-7.05896	0.82522
						-2.74	3.16			-7.05396	0.70122
						-2.735	3.036			-7.04896	0.65788
						-2.73	2.84			-7.04396	0.68673
						-2.725	2.595			-7.03896	0.76136
						-2.72	2.347			-7.03396	0.84827
						-2.715	2.133			-7.02896	0.92173
						-2.71	1.968			-7.02396	0.97601
						-2.705	1.847			-7.01896	1.02167
						-2.7	1.755			-7.01396	1.07283
						-2.695	1.684			-7.00896	1.13096
						-2.69	1.633			-7.00396	1.18127
						-2.685	1.601			-6.99896	1.20009
						-2.68	1.589			-6.99396	1.16785
						-2.675	1.59			-6.98896	1.07914
						-2.67	1.601			-6.98396	0.9432
						-2.665	1.619			-6.97896	0.7785
						-2.66	1.64			-6.97396	0.60691
						-2.655	1.654			-6.96896	0.44992
						-2.65	1.643			-6.96396	0.32664
						-2.645	1.588			-6.95896	0.25127
						-2.64	1.475			-6.95396	0.22844
						-2.635	1.304			-6.94896	0.25005
						-2.63	1.1			-6.94396	0.29557
						-2.625	0.9075			-6.93896	0.33799
						-2.62	0.7793			-6.93396	0.35443
						-2.615	0.7486			-6.92896	0.33572
						-2.61	0.8104			-6.92396	0.29101
						-2.605	0.9221			-6.91896	0.24308
						-2.6	1.028			-6.91396	0.21887
						-2.595	1.09			-6.90896	0.23931
						-2.59	1.11			-6.90396	0.3118
						-2.585	1.121			-6.89896	0.4262
						-2.58	1.159			-6.89396	0.55498
						-2.575	1.238			-6.88896	0.65999
						-2.57	1.343			-6.88396	0.70677
						-2.565	1.447			-6.87896	0.67803
						-2.56	1.534			-6.87396	0.58336
						-2.555	1.602			-6.86896	0.45228
						-2.55	1.66			-6.86396	0.32012
						-2.545	1.726			-6.85896	0.21397
						-2.54	1.827			-6.85396	0.14688
						-2.535	1.999			-6.84896	0.12192
						-2.53	2.279			-6.84396	0.14006
						-2.525	2.686			-6.83896	0.20615
						-2.52	3.194			-6.83396	0.33076
						-2.515	3.723			-6.82896	0.53064
						-2.51	4.171			-6.82396	0.83114
						-2.505	4.479			-6.81896	1.26648
						-2.5	4.685			-6.81396	1.86774
						-2.495	4.91			-6.80896	2.63016
						-2.49	5.276			-6.80396	3.47146
						-2.485	5.791			-6.79896	4.21794
						-2.48	6.315			-6.79396	4.6502
						-2.475	6.628			-6.78896	4.6073
						-2.47	6.557			-6.78396	4.07446
						-2.465	6.073			-6.77896	3.20589
						-2.46	5.292			-6.77396	2.24432
						-2.455	4.405			-6.76896	1.40677
						-2.45	3.592			-6.76396	0.8124
						-2.445	2.969			-6.75896	0.4741
						-2.44	2.579			-6.75396	0.33719
						-2.435	2.4			-6.74896	0.32435
						-2.43	2.369			-6.74396	0.36357
						-2.425	2.398			-6.73896	0.40011
						-2.42	2.402			-6.73396	0.40248
						-2.415	2.317			-6.72896	0.3625
						-2.41	2.121			-6.72396	0.29138
						-2.405	1.847			-6.71896	0.20979
						-2.4	1.561			-6.71396	0.13632
						-2.395	1.338			-6.70896	0.08142
						-2.39	1.216			-6.70396	0.04702
						-2.385	1.188			-6.69896	0.03016
						-2.38	1.219			-6.69396	0.02719
						-2.375	1.283			-6.68896	0.03643
						-2.37	1.381			-6.68396	0.05898
						-2.365	1.53			-6.67896	0.09776
						-2.36	1.725			-6.67396	0.15433
						-2.355	1.916			-6.66896	0.22465
						-2.35	2.024			-6.66396	0.29615
						-2.345	1.996			-6.65896	0.34978
						-2.34	1.846			-6.65396	0.3681
						-2.335	1.659			-6.64896	0.34376
						-2.33	1.538			-6.64396	0.28427
						-2.325	1.544			-6.63896	0.20802
						-2.32	1.665			-6.63396	0.13463
						-2.315	1.828			-6.62896	0.07703
						-2.31	1.947			-6.62396	0.03897
						-2.305	1.97			-6.61896	0.01751
						-2.3	1.898			-6.61396	0.00717
						-2.295	1.77			-6.60896	0.0031
						-2.29	1.627			-6.60396	0.00222
						-2.285	1.498			-6.59896	0.00294
						-2.28	1.404			-6.59396	0.00453
						-2.275	1.377			-6.58896	0.00648
						-2.27	1.46			-6.58396	0.00826
						-2.265	1.693			-6.57896	0.00932
						-2.26	2.068			-6.57396	0.00928
						-2.255	2.522			-6.56896	0.00817
						-2.25	2.949			-6.56396	0.00636
						-2.245	3.239			-6.55896	0.00437
						-2.24	3.325			-6.55396	0.00266
						-2.235	3.202			-6.54896	0.00143
						-2.23	2.92			-6.54396	0.00071
						-2.225	2.553			-6.53896	0.0004
						-2.22	2.167			-6.53396	0.00054
						-2.215	1.798			-6.52896	0.00147
						-2.21	1.457			-6.52396	0.00426
						-2.205	1.158			-6.51896	0.01121
						-2.2	0.9349			-6.51396	0.02644
						-2.195	0.8456			-6.50896	0.05567
						-2.19	0.9567			-6.50396	0.10451
						-2.185	1.313			-6.49896	0.17485
						-2.18	1.908			-6.49396	0.26067
						-2.175	2.671			-6.48896	0.34708
						-2.17	3.478			-6.48396	0.41483
						-2.165	4.184			-6.47896	0.45084
						-2.16	4.682			-6.47396	0.45589
						-2.155	4.937			-6.46896	0.44504
						-2.15	4.985			-6.46396	0.43684
						-2.145	4.901			-6.45896	0.43973
						-2.14	4.749			-6.45396	0.44556
						-2.135	4.553			-6.44896	0.43607
						-2.13	4.312			-6.44396	0.39693
						-2.125	4.022			-6.43896	0.32786
						-2.12	3.703			-6.43396	0.24237
						-2.115	3.386			-6.42896	0.15922
						-2.11	3.09			-6.42396	0.09269
						-2.105	2.796			-6.41896	0.04775
						-2.1	2.467			-6.41396	0.02175
						-2.095	2.081			-6.40896	0.00876
						-2.09	1.661			-6.40396	0.00311
						-2.085	1.274			-6.39896	0.00098
						-2.08	1.001			-6.39396	0.00027
						-2.075	0.8924			-6.38896	7e-05
						-2.07	0.953			-6.38396	1e-05
						-2.065	1.144			-6.37896	0
						-2.06	1.411			-6.37396	0
						-2.055	1.716			-6.36896	0
						-2.05	2.056			-6.36396	0
						-2.045	2.463			-6.35896	1e-05
						-2.04	2.968			-6.35396	4e-05
						-2.035	3.567			-6.34896	0.00016
						-2.03	4.177			-6.34396	0.00059
						-2.025	4.654			-6.33896	0.00195
						-2.02	4.841			-6.33396	0.00575
						-2.015	4.66			-6.32896	0.01495
						-2.01	4.173			-6.32396	0.03435
						-2.005	3.579			-6.31896	0.06977
						-2	3.122			-6.31396	0.12519
						-1.995	2.97			-6.30896	0.19853
						-1.99	3.134			-6.30396	0.27834
						-1.985	3.459			-6.29896	0.34493
						-1.98	3.715			-6.29396	0.3784
						-1.975	3.714			-6.28896	0.36804
						-1.97	3.408			-6.28396	0.31851
						-1.965	2.894			-6.27896	0.24727
						-1.96	2.351			-6.27396	0.17527
						-1.955	1.936			-6.26896	0.11748
						-1.95	1.726			-6.26396	0.07894
						-1.945	1.703			-6.25896	0.0568
						-1.94	1.797			-6.25396	0.04501
						-1.935	1.937			-6.24896	0.03876
						-1.93	2.078			-6.24396	0.03681
						-1.925	2.208			-6.23896	0.0432
						-1.92	2.348			-6.23396	0.06997
						-1.915	2.543			-6.22896	0.14217
						-1.91	2.857			-6.22396	0.3031
						-1.905	3.367			-6.21896	0.61395
						-1.9	4.143			-6.21396	1.13959
						-1.895	5.215			-6.20896	1.91992
						-1.89	6.552			-6.20396	2.94073
						-1.885	8.048			-6.19896	4.12359
						-1.88	9.537			-6.19396	5.34897
						-1.875	10.83			-6.18896	6.48356
						-1.87	11.74			-6.18396	7.3964
						-1.865	12.15			-6.17896	7.95976
						-1.86	12			-6.17396	8.06283
						-1.855	11.28			-6.16896	7.6601
						-1.85	10.1			-6.16396	6.81889
						-1.845	8.614			-6.15896	5.71323
						-1.84	7.069			-6.15396	4.57301
						-1.835	5.718			-6.14896	3.57815
						-1.83	4.75			-6.14396	2.82281
						-1.825	4.22			-6.13896	2.30798
						-1.82	4.038			-6.13396	1.98451
						-1.815	4.007			-6.12896	1.79172
						-1.81	3.919			-6.12396	1.68156
						-1.805	3.642			-6.11896	1.62572
						-1.8	3.171			-6.11396	1.6124
						-1.795	2.615			-6.10896	1.63444
						-1.79	2.134			-6.10396	1.67849
						-1.785	1.862			-6.09896	1.71774
						-1.78	1.858			-6.09396	1.71877
						-1.775	2.082			-6.08896	1.65601
						-1.77	2.427			-6.08396	1.52326
						-1.765	2.776			-6.07896	1.33875
						-1.76	3.059			-6.07396	1.13687
						-1.755	3.285			-6.06896	0.95721
						-1.75	3.508			-6.06396	0.83401
						-1.745	3.774			-6.05896	0.78886
						-1.74	4.066			-6.05396	0.82616
						-1.735	4.298			-6.04896	0.93043
						-1.73	4.372			-6.04396	1.07097
						-1.725	4.241			-6.03896	1.20747
						-1.72	3.938			-6.03396	1.30003
						-1.715	3.539			-6.02896	1.32097
						-1.71	3.108			-6.02396	1.26561
						-1.705	2.662			-6.01896	1.15685
						-1.7	2.19			-6.01396	1.03763
						-1.695	1.692			-6.00896	0.9546
						-1.69	1.204			-6.00396	0.94062
						-1.685	0.7788			-5.99896	1.0057
						-1.68	0.4565			-5.99396	1.13484
						-1.675	0.2513			-5.98896	1.29578
						-1.67	0.1557			-5.98396	1.44972
						-1.665	0.1578			-5.97896	1.56569
						-1.66	0.2544			-5.97396	1.63317
						-1.655	0.4497			-5.96896	1.663
						-1.65	0.7403			-5.96396	1.67521
						-1.645	1.097			-5.95896	1.68052
						-1.64	1.457			-5.95396	1.6732
						-1.635	1.741			-5.94896	1.63727
						-1.63	1.884			-5.94396	1.55895
						-1.625	1.872			-5.93896	1.43551
						-1.62	1.748			-5.93396	1.27862
						-1.615	1.584			-5.92896	1.11386
						-1.61	1.44			-5.92396	0.97697
						-1.605	1.337			-5.91896	0.90365
						-1.6	1.271			-5.91396	0.9122
						-1.595	1.241			-5.90896	0.98832
						-1.59	1.273			-5.90396	1.08511
						-1.585	1.415			-5.89896	1.14284
						-1.58	1.695			-5.89396	1.11648
						-1.575	2.085			-5.88896	0.99578
						-1.57	2.499			-5.88396	0.80575
						-1.565	2.835			-5.87896	0.59136
						-1.56	3.025			-5.87396	0.39544
						-1.555	3.065			-5.86896	0.24495
						-1.55	2.998			-5.86396	0.14706
						-1.545	2.867			-5.85896	0.09595
						-1.54	2.678			-5.85396	0.08117
						-1.535	2.408			-5.84896	0.09369
						-1.53	2.039			-5.84396	0.12689
						-1.525	1.597			-5.83896	0.17359
						-1.52	1.15			-5.83396	0.22338
						-1.515	0.7789			-5.82896	0.26394
						-1.51	0.5447			-5.82396	0.28632
						-1.505	0.468			-5.81896	0.29105
						-1.5	0.5313			-5.81396	0.28912
						-1.495	0.6888			-5.80896	0.29637
						-1.49	0.8804			-5.80396	0.32478
						-1.485	1.051			-5.79896	0.37662
						-1.48	1.171			-5.79396	0.44553
						-1.475	1.241			-5.78896	0.52194
						-1.47	1.289			-5.78396	0.59837
						-1.465	1.342			-5.77896	0.66858
						-1.46	1.414			-5.77396	0.72458
						-1.455	1.511			-5.76896	0.75442
						-1.45	1.649			-5.76396	0.74781
						-1.445	1.852			-5.75896	0.70378
						-1.44	2.152			-5.75396	0.63576
						-1.435	2.569			-5.74896	0.56666
						-1.43	3.09			-5.74396	0.51676
						-1.425	3.675			-5.73896	0.49394
						-1.42	4.262			-5.73396	0.49169
						-1.415	4.799			-5.72896	0.49807
						-1.41	5.257			-5.72396	0.5052
						-1.405	5.621			-5.71896	0.51128
						-1.4	5.855			-5.71396	0.51627
						-1.395	5.88			-5.70896	0.51637
						-1.39	5.598			-5.70396	0.50739
						-1.385	4.962			-5.69896	0.49252
						-1.38	4.034			-5.69396	0.48851
						-1.375	2.979			-5.68896	0.51927
						-1.37	1.99			-5.68396	0.60037
						-1.365	1.217			-5.67896	0.72467
						-1.36	0.7256			-5.67396	0.86018
						-1.355	0.5145			-5.66896	0.96463
						-1.35	0.5497			-5.66396	1.00616
						-1.345	0.7856			-5.65896	0.98032
						-1.34	1.163			-5.65396	0.91034
						-1.335	1.601			-5.64896	0.83633
						-1.33	2			-5.64396	0.79869
						-1.325	2.274			-5.63896	0.82536
						-1.32	2.381			-5.63396	0.9235
						-1.315	2.337			-5.62896	1.07713
						-1.31	2.2			-5.62396	1.25032
						-1.305	2.037			-5.61896	1.39575
						-1.3	1.899			-5.61396	1.47004
						-1.295	1.807			-5.60896	1.45114
						-1.29	1.755			-5.60396	1.34646
						-1.285	1.722			-5.59896	1.18695
						-1.28	1.677			-5.59396	1.00766
						-1.275	1.593			-5.58896	0.832
						-1.27	1.453			-5.58396	0.6679
						-1.265	1.255			-5.57896	0.5162
						-1.26	1.026			-5.57396	0.3819
						-1.255	0.8189			-5.56896	0.27703
						-1.25	0.6991			-5.56396	0.21623
						-1.245	0.7256			-5.55896	0.20989
						-1.24	0.9264			-5.55396	0.25961
						-1.235	1.282			-5.54896	0.3592
						-1.23	1.722			-5.54396	0.50256
						-1.225	2.137			-5.53896	0.70153
						-1.22	2.417			-5.53396	1.00209
						-1.215	2.487			-5.52896	1.4874
						-1.21	2.337			-5.52396	2.24267
						-1.205	2.018			-5.51896	3.28882
						-1.2	1.629			-5.51396	4.5178
						-1.195	1.285			-5.50896	5.68093
						-1.19	1.081			-5.50396	6.48088
						-1.185	1.072			-5.49896	6.70118
						-1.18	1.248			-5.49396	6.31961
						-1.175	1.536			-5.48896	5.50185
						-1.17	1.829			-5.48396	4.50702
						-1.165	2.024			-5.47896	3.55974
						-1.16	2.075			-5.47396	2.78835
						-1.155	2.003			-5.46896	2.22312
						-1.15	1.871			-5.46396	1.83978
						-1.145	1.746			-5.45896	1.59446
						-1.14	1.662			-5.45396	1.44097
						-1.135	1.624			-5.44896	1.33676
						-1.13	1.618			-5.44396	1.24809
						-1.125	1.631			-5.43896	1.15657
						-1.12	1.651			-5.43396	1.0609
						-1.115	1.669			-5.42896	0.97263
						-1.11	1.678			-5.42396	0.90665
						-1.105	1.676			-5.41896	0.87207
						-1.1	1.661			-5.41396	0.86429
						-1.095	1.636			-5.40896	0.86795
						-1.09	1.603			-5.40396	0.86499
						-1.085	1.566			-5.39896	0.8477
						-1.08	1.535			-5.39396	0.82129
						-1.075	1.53			-5.38896	0.79817
						-1.07	1.591			-5.38396	0.7858
						-1.065	1.763			-5.37896	0.77992
						-1.06	2.076			-5.37396	0.76774
						-1.055	2.519			-5.36896	0.7372
						-1.05	3.043			-5.36396	0.68581
						-1.045	3.575			-5.35896	0.62308
						-1.04	4.045			-5.35396	0.56416
						-1.035	4.399			-5.34896	0.52099
						-1.03	4.598			-5.34396	0.49445
						-1.025	4.609			-5.33896	0.47736
						-1.02	4.418			-5.33396	0.46237
						-1.015	4.052			-5.32896	0.44888
						-1.01	3.601			-5.32396	0.44174
						-1.005	3.188			-5.31896	0.44191
						-1	2.924			-5.31396	0.44168
						-0.995	2.859			-5.30896	0.42802
						-0.99	2.973			-5.30396	0.39375
						-0.985	3.207			-5.29896	0.34773
						-0.98	3.504			-5.29396	0.31281
						-0.975	3.825			-5.28896	0.31658
						-0.97	4.139			-5.28396	0.37722
						-0.965	4.404			-5.27896	0.49351
						-0.96	4.564			-5.27396	0.64293
						-0.955	4.553			-5.26896	0.79051
						-0.95	4.319			-5.26396	0.90142
						-0.945	3.848			-5.25896	0.95433
						-0.94	3.184			-5.25396	0.94516
						-0.935	2.429			-5.24896	0.88506
						-0.93	1.717			-5.24396	0.79276
						-0.925	1.175			-5.23896	0.69467
						-0.92	0.891			-5.23396	0.62363
						-0.915	0.907			-5.22896	0.61826
						-0.91	1.221			-5.22396	0.71031
						-0.905	1.786			-5.21896	0.90816
						-0.9	2.503			-5.21396	1.18583
						-0.895	3.23			-5.20896	1.48762
						-0.89	3.814			-5.20396	1.75125
						-0.885	4.155			-5.19896	1.93597
						-0.88	4.246			-5.19396	2.03687
						-0.875	4.189			-5.18896	2.07636
						-0.87	4.14			-5.18396	2.08112
						-0.865	4.227			-5.17896	2.06144
						-0.86	4.48			-5.17396	2.01075
						-0.855	4.806			-5.16896	1.91902
						-0.85	5.053			-5.16396	1.78771
						-0.845	5.096			-5.15896	1.63266
						-0.84	4.919			-5.15396	1.47671
						-0.835	4.623			-5.14896	1.34137
						-0.83	4.36			-5.14396	1.24561
						-0.825	4.25			-5.13896	1.20709
						-0.82	4.323			-5.13396	1.24076
						-0.815	4.507			-5.12896	1.3479
						-0.81	4.668			-5.12396	1.50566
						-0.805	4.659			-5.11896	1.66879
						-0.8	4.384			-5.11396	1.78865
						-0.795	3.835			-5.10896	1.84262
						-0.79	3.106			-5.10396	1.84927
						-0.785	2.359			-5.09896	1.85804
						-0.78	1.759			-5.09396	1.92369
						-0.775	1.418			-5.08896	2.08802
						-0.77	1.359			-5.08396	2.3809
						-0.765	1.528			-5.07896	2.82645
						-0.76	1.823			-5.07396	3.42864
						-0.755	2.134			-5.06896	4.12647
						-0.75	2.377			-5.06396	4.77684
						-0.745	2.51			-5.05896	5.17918
						-0.74	2.525			-5.05396	5.16491
						-0.735	2.434			-5.04896	4.70303
						-0.73	2.254			-5.04396	3.91503
						-0.725	1.997			-5.03896	3.03083
						-0.72	1.682			-5.03396	2.27681
						-0.715	1.341			-5.02896	1.78527
						-0.71	1.021			-5.02396	1.57248
						-0.705	0.7814			-5.01896	1.56579
						-0.7	0.6692			-5.01396	1.65903
						-0.695	0.7068			-5.00896	1.76519
						-0.69	0.8812			-5.00396	1.8475
						-0.685	1.147			-4.99896	1.92007
						-0.68	1.444			-4.99396	2.03297
						-0.675	1.715			-4.98896	2.25168
						-0.67	1.933			-4.98396	2.64582
						-0.665	2.1			-4.97896	3.2749
						-0.66	2.237			-4.97396	4.15777
						-0.655	2.357			-4.96896	5.21799
						-0.65	2.448			-4.96396	6.24839
						-0.645	2.482			-4.95896	6.95476
						-0.64	2.451			-4.95396	7.0834
						-0.635	2.394			-4.94896	6.55358
						-0.63	2.384			-4.94396	5.51564
						-0.625	2.478			-4.93896	4.26853
						-0.62	2.661			-4.93396	3.10914
						-0.615	2.84			-4.92896	2.21446
						-0.61	2.891			-4.92396	1.61939
						-0.605	2.741			-4.91896	1.2601
						-0.6	2.414			-4.91396	1.05204
						-0.595	2.017			-4.90896	0.93176
						-0.59	1.675			-4.90396	0.87005
						-0.585	1.465			-4.89896	0.8622
						-0.58	1.392			-4.89396	0.91186
						-0.575	1.406			-4.88896	1.01645
						-0.57	1.445			-4.88396	1.1593
						-0.565	1.458			-4.87896	1.30843
						-0.56	1.416			-4.87396	1.42749
						-0.555	1.306			-4.86896	1.48809
						-0.55	1.129			-4.86396	1.4778
						-0.545	0.9089			-4.85896	1.39844
						-0.54	0.6893			-4.85396	1.26121
						-0.535	0.5233			-4.84896	1.08498
						-0.53	0.4561			-4.84396	0.89731
						-0.525	0.5113			-4.83896	0.73399
						-0.52	0.6844			-4.83396	0.63144
						-0.515	0.9444			-4.82896	0.61088
						-0.51	1.243			-4.82396	0.66589
						-0.505	1.53			-4.81896	0.76034
						-0.5	1.773			-4.81396	0.84329
						-0.495	1.966			-4.80896	0.87394
						-0.49	2.128			-4.80396	0.84131
						-0.485	2.281			-4.79896	0.76688
						-0.48	2.436			-4.79396	0.6867
						-0.475	2.576			-4.78896	0.62585
						-0.47	2.666			-4.78396	0.58497
						-0.465	2.676			-4.77896	0.54593
						-0.46	2.595			-4.77396	0.49028
						-0.455	2.444			-4.76896	0.41635
						-0.45	2.254			-4.76396	0.34234
						-0.445	2.057			-4.75896	0.29534
						-0.44	1.869			-4.75396	0.29626
						-0.435	1.698			-4.74896	0.34831
						-0.43	1.555			-4.74396	0.43425
						-0.425	1.455			-4.73896	0.52369
						-0.42	1.418			-4.73396	0.58506
						-0.415	1.452			-4.72896	0.59886
						-0.41	1.556			-4.72396	0.56245
						-0.405	1.722			-4.71896	0.48704
						-0.4	1.941			-4.71396	0.391
						-0.395	2.193			-4.70896	0.29269
						-0.39	2.445			-4.70396	0.20766
						-0.385	2.661			-4.69896	0.1485
						-0.38	2.811			-4.69396	0.12471
						-0.375	2.894			-4.68896	0.14228
						-0.37	2.919			-4.68396	0.20139
						-0.365	2.893			-4.67896	0.29377
						-0.36	2.816			-4.67396	0.40162
						-0.355	2.687			-4.66896	0.50297
						-0.35	2.525			-4.66396	0.5801
						-0.345	2.377			-4.65896	0.62726
						-0.34	2.295			-4.65396	0.64915
						-0.335	2.31			-4.64896	0.65197
						-0.33	2.416			-4.64396	0.63659
						-0.325	2.565			-4.63896	0.59881
						-0.32	2.705			-4.63396	0.54132
						-0.315	2.797			-4.62896	0.48017
						-0.31	2.832			-4.62396	0.44177
						-0.305	2.812			-4.61896	0.4491
						-0.3	2.743			-4.61396	0.50704
						-0.295	2.641			-4.60896	0.59922
						-0.29	2.535			-4.60396	0.69461
						-0.285	2.453			-4.59896	0.76462
						-0.28	2.402			-4.59396	0.79541
						-0.275	2.353			-4.58896	0.7909
						-0.27	2.274			-4.58396	0.76438
						-0.265	2.166			-4.57896	0.72491
						-0.26	2.072			-4.57396	0.67232
						-0.255	2.051			-4.56896	0.60242
						-0.25	2.127			-4.56396	0.51792
						-0.245	2.269			-4.55896	0.43496
						-0.24	2.416			-4.55396	0.37769
						-0.235	2.534			-4.54896	0.36484
						-0.23	2.64			-4.54396	0.39762
						-0.225	2.794			-4.53896	0.45731
						-0.22	3.046			-4.53396	0.51495
						-0.215	3.399			-4.52896	0.54799
						-0.21	3.801			-4.52396	0.55284
						-0.205	4.182			-4.51896	0.5443
						-0.2	4.503			-4.51396	0.54191
						-0.195	4.789			-4.50896	0.55245
						-0.19	5.1			-4.50396	0.56327
						-0.185	5.474			-4.49896	0.55117
						-0.18	5.858			-4.49396	0.50075
						-0.175	6.107			-4.48896	0.41615
						-0.17	6.053			-4.48396	0.32028
						-0.165	5.604			-4.47896	0.24332
						-0.16	4.818			-4.47396	0.20931
						-0.155	3.877			-4.46896	0.22708
						-0.15	3.003			-4.46396	0.28792
						-0.145	2.35			-4.45896	0.36826
						-0.14	1.973			-4.45396	0.43839
						-0.135	1.841			-4.44896	0.47637
						-0.13	1.894			-4.44396	0.48328
						-0.125	2.067			-4.43896	0.49439
						-0.12	2.304			-4.43396	0.58089
						-0.115	2.554			-4.42896	0.84219
						-0.11	2.788			-4.42396	1.38299
						-0.105	2.997			-4.41896	2.2747
						-0.1	3.17			-4.41396	3.49585
						-0.095	3.271			-4.40896	4.88898
						-0.09	3.234			-4.40396	6.16462
						-0.085	2.996			-4.39896	6.99077
						-0.08	2.551			-4.39396	7.14259
						-0.075	1.97			-4.38896	6.61105
						-0.07	1.367			-4.38396	5.61796
						-0.065	0.8479			-4.37896	4.48102
						-0.06	0.4682			-4.37396	3.47544
						-0.055	0.2298			-4.36896	2.73205
						-0.05	0.1001			-4.36396	2.23661
						-0.045	0.03866			-4.35896	1.90606
						-0.04	0.01323			-4.35396	1.66085
						-0.035	0.00401			-4.34896	1.4645
						-0.03	0.00108			-4.34396	1.31694
						-0.025	0.00026			-4.33896	1.22695
						-0.02	5e-05			-4.33396	1.18967
						-0.015	1e-05			-4.32896	1.18638
						-0.01	0			-4.32396	1.20118
						-0.005	0			-4.31896	1.23839
						0	0			-4.31396	1.3218
						0.005	0			-4.30896	1.4776
						0.01	0			-4.30396	1.72403
						0.015	0			-4.29896	2.08549
						0.02	0			-4.29396	2.63374
						0.025	0			-4.28896	3.51037
						0.03	0			-4.28396	4.89582
						0.035	0			-4.27896	6.877
						0.04	0			-4.27396	9.29943
						0.045	0			-4.26896	11.6885
						0.05	0			-4.26396	13.384
						0.055	0			-4.25896	13.8295
						0.06	0			-4.25396	12.8508
						0.065	0			-4.24896	10.7553
						0.07	0			-4.24396	8.15305
						0.075	0			-4.23896	5.68023
						0.08	0			-4.23396	3.77232
						0.085	0			-4.22896	2.60063
						0.09	0			-4.22396	2.14949
						0.095	0			-4.21896	2.31981
						0.1	0			-4.21396	3.00355
						0.105	0			-4.20896	4.08696
						0.11	0			-4.20396	5.39991
						0.115	0			-4.19896	6.68566
						0.12	0			-4.19396	7.63292
						0.125	0			-4.18896	7.98799
						0.13	0			-4.18396	7.68405
						0.135	0			-4.17896	6.87869
						0.14	0			-4.17396	5.8727
						0.145	0			-4.16896	4.96552
						0.15	0			-4.16396	4.33139
						0.155	0			-4.15896	3.99361
						0.16	0			-4.15396	3.87118
						0.165	0			-4.14896	3.85338
						0.17	0			-4.14396	3.85408
						0.175	0			-4.13896	3.82058
						0.18	0			-4.13396	3.71654
						0.185	0			-4.12896	3.52405
						0.19	0			-4.12396	3.24118
						0.195	0			-4.11896	2.89806
						0.2	0			-4.11396	2.55307
						0.205	0			-4.10896	2.2593
						0.21	0			-4.10396	2.04688
						0.215	0			-4.09896	1.91238
						0.22	0			-4.09396	1.83524
						0.225	0			-4.08896	1.79898
						0.23	0			-4.08396	1.80573
						0.235	0			-4.07896	1.87417
						0.24	0			-4.07396	2.03088
						0.245	0			-4.06896	2.29648
						0.25	0			-4.06396	2.66755
						0.255	0			-4.05896	3.09629
						0.26	0			-4.05396	3.48198
						0.265	0			-4.04896	3.69338
						0.27	0			-4.04396	3.62921
						0.275	0			-4.03896	3.28006
						0.28	0			-4.03396	2.73318
						0.285	0			-4.02896	2.13457
						0.29	0			-4.02396	1.61042
						0.295	0			-4.01896	1.22
						0.3	0			-4.01396	0.95536
						0.305	0			-4.00896	0.77854
						0.31	0			-4.00396	0.65842
						0.315	0			-3.99896	0.58967
						0.32	0			-3.99396	0.58409
						0.325	0			-3.98896	0.65024
						0.33	0			-3.98396	0.77829
						0.335	0			-3.97896	0.93912
						0.34	0			-3.97396	1.09436
						0.345	0			-3.96896	1.21096
						0.35	0			-3.96396	1.26907
						0.355	0			-3.95896	1.26109
						0.36	0			-3.95396	1.19089
						0.365	0			-3.94896	1.0727
						0.37	0			-3.94396	0.93024
						0.375	0			-3.93896	0.79258
						0.38	0			-3.93396	0.68139
						0.385	0			-3.92896	0.60312
						0.39	0			-3.92396	0.54826
						0.395	0			-3.91896	0.50428
						0.4	0			-3.91396	0.46919
						0.405	0			-3.90896	0.45565
						0.41	0			-3.90396	0.47836
						0.415	0			-3.89896	0.53874
						0.42	0			-3.89396	0.61558
						0.425	0			-3.88896	0.67297
						0.43	0			-3.88396	0.67974
						0.435	0			-3.87896	0.63033
						0.44	0			-3.87396	0.5494
						0.445	0			-3.86896	0.4817
						0.45	0			-3.86396	0.47054
						0.455	0			-3.85896	0.53879
						0.46	0			-3.85396	0.6797
						0.465	0			-3.84896	0.86037
						0.47	0			-3.84396	1.03643
						0.475	0			-3.83896	1.16929
						0.48	0			-3.83396	1.23889
						0.485	0			-3.82896	1.24557
						0.49	0			-3.82396	1.20266
						0.495	0			-3.81896	1.12541
						0.5	0			-3.81396	1.0242
						0.505	0			-3.80896	0.90215
						0.51	0			-3.80396	0.7613
						0.515	0			-3.79896	0.60924
						0.52	0			-3.79396	0.46428
						0.525	0			-3.78896	0.35266
						0.53	0			-3.78396	0.30241
						0.535	0			-3.77896	0.33431
						0.54	0			-3.77396	0.45371
						0.545	0			-3.76896	0.64321
						0.55	0			-3.76396	0.8622
						0.555	0			-3.75896	1.05206
						0.56	0			-3.75396	1.157
						0.565	0			-3.74896	1.14547
						0.57	0			-3.74396	1.02668
						0.575	0			-3.73896	0.8464
						0.58	0			-3.73396	0.66738
						0.585	0			-3.72896	0.54176
						0.59	0			-3.72396	0.49142
						0.595	0			-3.71896	0.50343
						0.6	0			-3.71396	0.5428
						0.605	0			-3.70896	0.57468
						0.61	0			-3.70396	0.58733
						0.615	0			-3.69896	0.59929
						0.62	0			-3.69396	0.65119
						0.625	0			-3.68896	0.77966
						0.63	0			-3.68396	0.99258
						0.635	0			-3.67896	1.25699
						0.64	0			-3.67396	1.50911
						0.645	0			-3.66896	1.68036
						0.65	0			-3.66396	1.72587
						0.655	0			-3.65896	1.6385
						0.66	0			-3.65396	1.44392
						0.665	0			-3.64896	1.18652
						0.67	0			-3.64396	0.91507
						0.675	0			-3.63896	0.67603
						0.68	0			-3.63396	0.50777
						0.685	0			-3.62896	0.43403
						0.69	0			-3.62396	0.45779
						0.695	0			-3.61896	0.55529
						0.7	0			-3.61396	0.68026
						0.705	0			-3.60896	0.77735
						0.71	0			-3.60396	0.80461
						0.715	0			-3.59896	0.75277
						0.72	0			-3.59396	0.64952
						0.725	0			-3.58896	0.54443
						0.73	0			-3.58396	0.48623
						0.735	0			-3.57896	0.50223
						0.74	0			-3.57396	0.59153
						0.745	0			-3.56896	0.73135
						0.75	0			-3.56396	0.88849
						0.755	0			-3.55896	1.02893
						0.76	0			-3.55396	1.12382
						0.765	0			-3.54896	1.1536
						0.77	0			-3.54396	1.1159
						0.775	0			-3.53896	1.02801
						0.78	0			-3.53396	0.92061
						0.785	0			-3.52896	0.8201
						0.79	0			-3.52396	0.73469
						0.795	0			-3.51896	0.65441
						0.8	0			-3.51396	0.56353
						0.805	0			-3.50896	0.45652
						0.81	0			-3.50396	0.34217
						0.815	0			-3.49896	0.23621
						0.82	0			-3.49396	0.15109
						0.825	0			-3.48896	0.09083
						0.83	0			-3.48396	0.05212
						0.835	0			-3.47896	0.0289
						0.84	0			-3.47396	0.01584
						0.845	0			-3.46896	0.00981
						0.85	0			-3.46396	0.01039
						0.855	0			-3.45896	0.02035
						0.86	0			-3.45396	0.04658
						0.865	0			-3.44896	0.09995
						0.87	0			-3.44396	0.19245
						0.875	0			-3.43896	0.3304
						0.88	0			-3.43396	0.50586
						0.885	0			-3.42896	0.69187
						0.89	0			-3.42396	0.84801
						0.895	0			-3.41896	0.93735
						0.9	0			-3.41396	0.9456
						0.905	0			-3.40896	0.88938
						0.91	0			-3.40396	0.80735
						0.915	0			-3.39896	0.73893
						0.92	0			-3.39396	0.70298
						0.925	0			-3.38896	0.69408
						0.93	0			-3.38396	0.69316
						0.935	0			-3.37896	0.68657
						0.94	0			-3.37396	0.67958
						0.945	0			-3.36896	0.69097
						0.95	0			-3.36396	0.73569
						0.955	0			-3.35896	0.80703
						0.96	0			-3.35396	0.87352
						0.965	0			-3.34896	0.89568
						0.97	0			-3.34396	0.85115
						0.975	0			-3.33896	0.74942
						0.98	0			-3.33396	0.62818
						0.985	0			-3.32896	0.53092
						0.99	0			-3.32396	0.48397
						0.995	0			-3.31896	0.48397
						1	0			-3.31396	0.50358
						1.005	0			-3.30896	0.51028
						1.01	0			-3.30396	0.48692
						1.015	0			-3.29896	0.44285
						1.02	0			-3.29396	0.40896
						1.025	0			-3.28896	0.42286
						1.03	0			-3.28396	0.50676
						1.035	0			-3.27896	0.65191
						1.04	0			-3.27396	0.81693
						1.045	0			-3.26896	0.94139
						1.05	0			-3.26396	0.97467
						1.055	0			-3.25896	0.90073
						1.06	0			-3.25396	0.74697
						1.065	0			-3.24896	0.56967
						1.07	0			-3.24396	0.42875
						1.075	0			-3.23896	0.36542
						1.08	0			-3.23396	0.39433
						1.085	0			-3.22896	0.50573
						1.09	0			-3.22396	0.67182
						1.095	0			-3.21896	0.85346
						1.1	0			-3.21396	1.00847
						1.105	0			-3.20896	1.1033
						1.11	0			-3.20396	1.12849
						1.115	0			-3.19896	1.10646
						1.12	0			-3.19396	1.08273
						1.125	0			-3.18896	1.09847
						1.13	0			-3.18396	1.16194
						1.135	0			-3.17896	1.23837
						1.14	0			-3.17396	1.27002
						1.145	0			-3.16896	1.2159
						1.15	0			-3.16396	1.07902
						1.155	0			-3.15896	0.90787
						1.16	0			-3.15396	0.77262
						1.165	0			-3.14896	0.73735
						1.17	0			-3.14396	0.84425
						1.175	0			-3.13896	1.1126
						1.18	0			-3.13396	1.55392
						1.185	0			-3.12896	2.19782
						1.19	0			-3.12396	3.12157
						1.195	0			-3.11896	4.44732
						1.2	0			-3.11396	6.26907
						1.205	0			-3.10896	8.51818
						1.21	0			-3.10396	10.8548
						1.215	0			-3.09896	12.6998
						1.22	0			-3.09396	13.4683
						1.225	0			-3.08896	12.8773
						1.23	0			-3.08396	11.1039
						1.235	0			-3.07896	8.69362
						1.24	0			-3.07396	6.2822
						1.245	0			-3.06896	4.32364
						1.25	0			-3.06396	2.98353
						1.255	0			-3.05896	2.20207
						1.26	0			-3.05396	1.8137
						1.265	0			-3.04896	1.65776
						1.27	0			-3.04396	1.62512
						1.275	0			-3.03896	1.65904
						1.28	0			-3.03396	1.73408
						1.285	0			-3.02896	1.83556
						1.29	0			-3.02396	1.94638
						1.295	0			-3.01896	2.04395
						1.3	0			-3.01396	2.10293
						1.305	0			-3.00896	2.10212
						1.31	0			-3.00396	2.03102
						1.315	0			-2.99896	1.89317
						1.32	0			-2.99396	1.70186
						1.325	0			-2.98896	1.47545
						1.33	0			-2.98396	1.23217
						1.335	0			-2.97896	0.99374
						1.34	0			-2.97396	0.78784
						1.345	0			-2.96896	0.64816
						1.35	0			-2.96396	0.60499
						1.355	0			-2.95896	0.67188
						1.36	0			-2.95396	0.83361
						1.365	0			-2.94896	1.04343
						1.37	0			-2.94396	1.2352
						1.375	0			-2.93896	1.34711
						1.38	0			-2.93396	1.34736
						1.385	0			-2.92896	1.24943
						1.39	0			-2.92396	1.10603
						1.395	0			-2.91896	0.98751
						1.4	0			-2.91396	0.95386
						1.405	0			-2.90896	1.03612
						1.41	0			-2.90396	1.23098
						1.415	0			-2.89896	1.50802
						1.42	0			-2.89396	1.81984
						1.425	0			-2.88896	2.10854
						1.43	0			-2.88396	2.31348
						1.435	0			-2.87896	2.38171
						1.44	0			-2.87396	2.2828
						1.445	0			-2.86896	2.02343
						1.45	0			-2.86396	1.64889
						1.455	0			-2.85896	1.22963
						1.46	0			-2.85396	0.83591
						1.465	0			-2.84896	0.51638
						1.47	0			-2.84396	0.28958
						1.475	0			-2.83896	0.14804
						1.48	0			-2.83396	0.07151
						1.485	0			-2.82896	0.03916
						1.49	0			-2.82396	0.03779
						1.495	0			-2.81896	0.06492
						1.5	0			-2.81396	0.1282
						1.505	0			-2.80896	0.24053
						1.51	0			-2.80396	0.41058
						1.515	0			-2.79896	0.63123
						1.52	0			-2.79396	0.87057
						1.525	0			-2.78896	1.0776
						1.53	0			-2.78396	1.20081
						1.535	0			-2.77896	1.21518
						1.54	0			-2.77396	1.13645
						1.545	0			-2.76896	1.01437
						1.55	1e-05			-2.76396	0.90513
						1.555	7e-05			-2.75896	0.84503
						1.56	0.00031			-2.75396	0.84029
						1.565	0.00127			-2.74896	0.87386
						1.57	0.00463			-2.74396	0.92298
						1.575	0.01497			-2.73896	0.97253
						1.58	0.04287			-2.73396	1.02022
						1.585	0.1088			-2.72896	1.07475
						1.59	0.245			-2.72396	1.15029
						1.595	0.4896			-2.71896	1.2574
						1.6	0.8693			-2.71396	1.39616
						1.605	1.374			-2.70896	1.55362
						1.61	1.937			-2.70396	1.71587
						1.615	2.445			-2.69896	1.88822
						1.62	2.786			-2.69396	2.11533
						1.625	2.903			-2.68896	2.47663
						1.63	2.829			-2.68396	3.04255
						1.635	2.666			-2.67896	3.81154
						1.64	2.511			-2.67396	4.6562
						1.645	2.402			-2.66896	5.34735
						1.65	2.3			-2.66396	5.64977
						1.655	2.141			-2.65896	5.44782
						1.66	1.897			-2.65396	4.79749
						1.665	1.604			-2.64896	3.89638
						1.67	1.34			-2.64396	2.96889
						1.675	1.166			-2.63896	2.17621
						1.68	1.088			-2.63396	1.58067
						1.685	1.058			-2.62896	1.17833
						1.69	1.01			-2.62396	0.93853
						1.695	0.9063			-2.61896	0.83936
						1.7	0.7563			-2.61396	0.88654
						1.705	0.6097			-2.60896	1.11657
						1.71	0.5279			-2.60396	1.59045
						1.715	0.5556			-2.59896	2.35991
						1.72	0.7036			-2.59396	3.40543
						1.725	0.9452			-2.58896	4.58179
						1.73	1.224			-2.58396	5.61394
						1.735	1.469			-2.57896	6.19614
						1.74	1.619			-2.57396	6.13277
						1.745	1.637			-2.56896	5.45606
						1.75	1.527			-2.56396	4.4152
						1.755	1.333			-2.55896	3.35854
						1.76	1.133			-2.55396	2.59646
						1.765	1.01			-2.54896	2.31123
						1.77	1.027			-2.54396	2.543
						1.775	1.197			-2.53896	3.20466
						1.78	1.476			-2.53396	4.10301
						1.785	1.782			-2.52896	4.97413
						1.79	2.023			-2.52396	5.55966
						1.795	2.146			-2.51896	5.69987
						1.8	2.145			-2.51396	5.39949
						1.805	2.06			-2.50896	4.80354
						1.81	1.95			-2.50396	4.11503
						1.815	1.872			-2.49896	3.50318
						1.82	1.863			-2.49396	3.056
						1.825	1.928			-2.48896	2.78927
						1.83	2.034			-2.48396	2.66581
						1.835	2.111			-2.47896	2.6248
						1.84	2.094			-2.47396	2.59028
						1.845	1.962			-2.46896	2.49362
						1.85	1.764			-2.46396	2.29607
						1.855	1.602			-2.45896	1.99634
						1.86	1.566			-2.45396	1.63258
						1.865	1.691			-2.44896	1.25405
						1.87	1.929			-2.44396	0.90702
						1.875	2.178			-2.43896	0.6197
						1.88	2.336			-2.43396	0.40563
						1.885	2.341			-2.42896	0.26989
						1.89	2.189			-2.42396	0.21436
						1.895	1.922			-2.41896	0.2382
						1.9	1.609			-2.41396	0.33513
						1.905	1.324			-2.40896	0.48748
						1.91	1.132			-2.40396	0.66159
						1.915	1.067			-2.39896	0.81134
						1.92	1.125			-2.39396	0.89209
						1.925	1.261			-2.38896	0.87844
						1.93	1.413			-2.38396	0.77523
						1.935	1.523			-2.37896	0.6165
						1.94	1.556			-2.37396	0.44923
						1.945	1.505			-2.36896	0.31545
						1.95	1.397			-2.36396	0.2408
						1.955	1.283			-2.35896	0.23021
						1.96	1.236			-2.35396	0.27083
						1.965	1.319			-2.34896	0.33642
						1.97	1.555			-2.34396	0.39563
						1.975	1.906			-2.33896	0.42308
						1.98	2.28			-2.33396	0.40992
						1.985	2.564			-2.32896	0.36873
						1.99	2.68			-2.32396	0.32616
						1.995	2.63			-2.31896	0.30941
						2	2.503			-2.31396	0.33191
						2.005	2.441			-2.30896	0.38838
						2.01	2.567			-2.30396	0.46088
						2.015	2.918			-2.29896	0.53244
						2.02	3.421			-2.29396	0.59868
						2.025	3.942			-2.28896	0.66766
						2.03	4.363			-2.28396	0.74748
						2.035	4.66			-2.27896	0.83196
						2.04	4.915			-2.27396	0.89741
						2.045	5.26			-2.26896	0.91547
						2.05	5.798			-2.26396	0.87408
						2.055	6.547			-2.25896	0.78756
						2.06	7.429			-2.25396	0.69017
						2.065	8.331			-2.24896	0.61433
						2.07	9.157			-2.24396	0.57358
						2.075	9.865			-2.23896	0.55986
						2.08	10.45			-2.23396	0.55609
						2.085	10.89			-2.22896	0.55164
						2.09	11.16			-2.22396	0.54759
						2.095	11.18			-2.21896	0.54955
						2.1	10.89			-2.21396	0.55788
						2.105	10.23			-2.20896	0.56553
						2.11	9.202			-2.20396	0.56606
						2.115	7.855			-2.19896	0.56057
						2.12	6.328			-2.19396	0.55663
						2.125	4.802			-2.18896	0.55911
						2.13	3.456			-2.18396	0.56468
						2.135	2.414			-2.17896	0.56515
						2.14	1.718			-2.17396	0.55851
						2.145	1.333			-2.16896	0.55398
						2.15	1.163			-2.16396	0.56652
						2.155	1.091			-2.15896	0.60515
						2.16	1.023			-2.15396	0.66736
						2.165	0.9139			-2.14896	0.74307
						2.17	0.7806			-2.14396	0.82171
						2.175	0.6763			-2.13896	0.8954
						2.18	0.6594			-2.13396	0.95414
						2.185	0.763			-2.12896	0.98249
						2.19	0.9847			-2.12396	0.96265
						2.195	1.292			-2.11896	0.888
						2.2	1.638			-2.11396	0.77124
						2.205	1.969			-2.10896	0.64382
						2.21	2.231			-2.10396	0.54224
						2.215	2.372			-2.09896	0.48919
						2.22	2.36			-2.09396	0.48259
						2.225	2.207			-2.08896	0.49798
						2.23	1.966			-2.08396	0.50467
						2.235	1.713			-2.07896	0.4848
						2.24	1.499			-2.07396	0.44392
						2.245	1.334			-2.06896	0.40536
						2.25	1.197			-2.06396	0.39297
						2.255	1.075			-2.05896	0.41472
						2.26	0.9861			-2.05396	0.45611
						2.265	0.9731			-2.04896	0.48971
						2.27	1.068			-2.04396	0.49328
						2.275	1.264			-2.03896	0.46575
						2.28	1.501			-2.03396	0.43015
						2.285	1.693			-2.02896	0.42215
						2.29	1.768			-2.02396	0.47036
						2.295	1.7			-2.01896	0.57991
						2.3	1.529			-2.01396	0.72648
						2.305	1.345			-2.00896	0.86549
						2.31	1.252			-2.00396	0.9516
						2.315	1.32			-1.99896	0.96066
						2.32	1.557			-1.99396	0.90069
						2.325	1.91			-1.98896	0.80618
						2.33	2.292			-1.98396	0.71672
						2.335	2.629			-1.97896	0.6552
						2.34	2.887			-1.97396	0.61849
						2.345	3.074			-1.96896	0.58701
						2.35	3.223			-1.96396	0.54436
						2.355	3.372			-1.95896	0.49263
						2.36	3.553			-1.95396	0.4511
						2.365	3.787			-1.94896	0.44154
						2.37	4.059			-1.94396	0.47258
						2.375	4.315			-1.93896	0.53549
						2.38	4.479			-1.93396	0.61395
						2.385	4.499			-1.92896	0.69971
						2.39	4.383			-1.92396	0.8005
						2.395	4.203			-1.91896	0.93615
						2.4	4.051			-1.91396	1.13112
						2.405	3.983			-1.90896	1.41805
						2.41	3.981			-1.90396	1.8472
						2.415	3.961			-1.89896	2.48535
						2.42	3.828			-1.89396	3.3714
						2.425	3.545			-1.88896	4.44399
						2.43	3.17			-1.88396	5.49548
						2.435	2.834			-1.87896	6.21615
						2.44	2.674			-1.87396	6.33848
						2.445	2.758			-1.86896	5.78871
						2.45	3.049			-1.86396	4.73766
						2.455	3.434			-1.85896	3.51463
						2.46	3.786			-1.85396	2.45217
						2.465	4.025			-1.84896	1.7488
						2.47	4.141			-1.84396	1.42671
						2.475	4.178			-1.83896	1.37561
						2.48	4.191			-1.83396	1.43099
						2.485	4.214			-1.82896	1.45133
						2.49	4.245			-1.82396	1.36271
						2.495	4.252			-1.81896	1.16457
						2.5	4.198			-1.81396	0.90486
						2.505	4.071			-1.80896	0.64379
						2.51	3.907			-1.80396	0.42486
						2.515	3.77			-1.79896	0.26717
						2.52	3.716			-1.79396	0.16985
						2.525	3.751			-1.78896	0.12158
						2.53	3.822			-1.78396	0.10759
						2.535	3.853			-1.77896	0.11333
						2.54	3.805			-1.77396	0.12662
						2.545	3.711			-1.76896	0.13878
						2.55	3.661			-1.76396	0.14487
						2.555	3.749			-1.75896	0.14287
						2.56	4.01			-1.75396	0.13244
						2.565	4.403			-1.74896	0.11466
						2.57	4.851			-1.74396	0.09191
						2.575	5.307			-1.73896	0.06804
						2.58	5.772			-1.73396	0.04733
						2.585	6.259			-1.72896	0.03342
						2.59	6.738			-1.72396	0.02833
						2.595	7.124			-1.71896	0.03226
						2.6	7.326			-1.71396	0.04344
						2.605	7.31			-1.70896	0.05817
						2.61	7.101			-1.70396	0.07152
						2.615	6.748			-1.69896	0.07876
						2.62	6.281			-1.69396	0.07756
						2.625	5.714			-1.68896	0.06912
						2.63	5.095			-1.68396	0.05781
						2.635	4.53			-1.67896	0.04898
						2.64	4.14			-1.67396	0.04658
						2.645	3.997			-1.66896	0.05145
						2.65	4.078			-1.66396	0.06112
						2.655	4.28			-1.65896	0.07084
						2.66	4.48			-1.65396	0.07571
						2.665	4.586			-1.64896	0.07284
						2.67	4.548			-1.64396	0.06254
						2.675	4.347			-1.63896	0.04785
						2.68	3.982			-1.63396	0.033
						2.685	3.48			-1.62896	0.02147
						2.69	2.921			-1.62396	0.01535
						2.695	2.441			-1.61896	0.01532
						2.7	2.199			-1.61396	0.02114
						2.705	2.318			-1.60896	0.03163
						2.71	2.827			-1.60396	0.04445
						2.715	3.652			-1.59896	0.05608
						2.72	4.649			-1.59396	0.06285
						2.725	5.668			-1.58896	0.06237
						2.73	6.592			-1.58396	0.05476
						2.735	7.343			-1.57896	0.04259
						2.74	7.85			-1.57396	0.02935
						2.745	8.049			-1.56896	0.01798
						2.75	7.912			-1.56396	0.00992
						2.755	7.484			-1.55896	0.00525
						2.76	6.866			-1.55396	0.00338
						2.765	6.173			-1.54896	0.0038
						2.77	5.482			-1.54396	0.00642
						2.775	4.834			-1.53896	0.01156
						2.78	4.256			-1.53396	0.01963
						2.785	3.795			-1.52896	0.03062
						2.79	3.512			-1.52396	0.04357
						2.795	3.462			-1.51896	0.05627
						2.8	3.655			-1.51396	0.06569
						2.805	4.034			-1.50896	0.06907
						2.81	4.477			-1.50396	0.06525
						2.815	4.833			-1.49896	0.05552
						2.82	4.975			-1.49396	0.04311
						2.825	4.848			-1.48896	0.03191
						2.83	4.476			-1.48396	0.02508
						2.835	3.944			-1.47896	0.02426
						2.84	3.366			-1.47396	0.0293
						2.845	2.865			-1.46896	0.03844
						2.85	2.56			-1.46396	0.04869
						2.855	2.558			-1.45896	0.05656
						2.86	2.944			-1.45396	0.0592
						2.865	3.767			-1.44896	0.05547
						2.87	5.017			-1.44396	0.04645
						2.875	6.583			-1.43896	0.0347
						2.88	8.247			-1.43396	0.02314
						2.885	9.718			-1.42896	0.01379
						2.89	10.73			-1.42396	0.00741
						2.895	11.13			-1.41896	0.00371
						2.9	11			-1.41396	0.00196
						2.905	10.54			-1.40896	0.0014
[truncated: 1,001 more rows]

## Sheet: F3b
F3b	Vgs (V)	Vds (V)	Ids (A/μm)	Vds (V)	Ids (A/μm)	Vds (V)	Ids (A/μm)	Vds (V)	Ids (A/μm)	Vds (V)	Ids (A/μm)
	-100	0.2	1.2e-12	0.4	8.99e-13	0.6	9.48e-13	0.8	9.31e-13	1	9.55e-13
	-99.2	0.2	7.58e-13	0.4	7.74e-13	0.6	6.08e-13	0.8	6.92e-13	1	6.13e-13
	-98.4	0.2	5.77e-13	0.4	5.64e-13	0.6	6.5e-13	0.8	6.38e-13	1	5.97e-13
	-97.6	0.2	4.89e-13	0.4	6.73e-13	0.6	6.2e-13	0.8	5.6e-13	1	6.46e-13
	-96.8	0.2	5.44e-13	0.4	4.81e-13	0.6	5.65e-13	0.8	5.63e-13	1	8.23e-13
	-96	0.2	3.42e-13	0.4	4.26e-13	0.6	5.75e-13	0.8	7.04e-13	1	1.15e-12
	-95.2	0.2	3.81e-13	0.4	4.77e-13	0.6	4.98e-13	0.8	9.31e-13	1	1.47e-12
	-94.4	0.2	4.2e-13	0.4	3.57e-13	0.6	7.14e-13	0.8	1.33e-12	1	2.9e-12
	-93.6	0.2	4.11e-13	0.4	5.07e-13	0.6	1.02e-12	0.8	2.38e-12	1	4.82e-12
	-92.8	0.2	3.52e-13	0.4	6.14e-13	0.6	1.59e-12	0.8	3.77e-12	1	8.44e-12
	-92	0.2	2.14e-13	0.4	1.02e-12	0.6	2.77e-12	0.8	6.85e-12	1	1.51e-11
	-91.2	0.2	3.36e-13	0.4	1.5e-12	0.6	5.11e-12	0.8	1.25e-11	1	2.83e-11
	-90.4	0.2	4.92e-13	0.4	2.58e-12	0.6	8.61e-12	0.8	2.19e-11	1	4.84e-11
	-89.6	0.2	6.18e-13	0.4	4.26e-12	0.6	1.53e-11	0.8	3.71e-11	1	8.54e-11
	-88.8	0.2	1.04e-12	0.4	7.24e-12	0.6	2.65e-11	0.8	6.5e-11	1	1.45e-10
	-88	0.2	1.47e-12	0.4	1.32e-11	0.6	4.61e-11	0.8	1.12e-10	1	2.43e-10
	-87.2	0.2	2.65e-12	0.4	2.32e-11	0.6	7.98e-11	0.8	1.84e-10	1	3.79e-10
	-86.4	0.2	4.2e-12	0.4	3.7e-11	0.6	1.25e-10	0.8	3.01e-10	1	6.36e-10
	-85.6	0.2	7.33e-12	0.4	6.17e-11	0.6	1.99e-10	0.8	4.59e-10	1	9.77e-10
	-84.8	0.2	1.3e-11	0.4	1.03e-10	0.6	3.2e-10	0.8	7.25e-10	1	1.45e-09
	-84	0.2	2.17e-11	0.4	1.65e-10	0.6	4.98e-10	0.8	1.1e-09	1	2.3e-09
	-83.2	0.2	3.59e-11	0.4	2.5e-10	0.6	7.55e-10	0.8	1.71e-09	1	3.62e-09
	-82.4	0.2	6e-11	0.4	3.93e-10	0.6	1.1e-09	0.8	2.76e-09	1	5.5e-09
	-81.6	0.2	9.8e-11	0.4	5.81e-10	0.6	1.66e-09	0.8	4.09e-09	1	8.14e-09
	-80.8	0.2	1.49e-10	0.4	9.13e-10	0.6	2.5e-09	0.8	6e-09	1	1.21e-08
	-80	0.2	2.17e-10	0.4	1.2e-09	0.6	3.59e-09	0.8	8.64e-09	1	1.81e-08
	-79.2	0.2	3.05e-10	0.4	1.79e-09	0.6	5.19e-09	0.8	1.18e-08	1	2.42e-08
	-78.4	0.2	4.43e-10	0.4	2.58e-09	0.6	7.52e-09	0.8	1.58e-08	1	3.36e-08
	-77.6	0.2	6.18e-10	0.4	3.84e-09	0.6	9.9e-09	0.8	2.2e-08	1	4.59e-08
	-76.8	0.2	8.83e-10	0.4	5.04e-09	0.6	1.41e-08	0.8	2.93e-08	1	5.71e-08
	-76	0.2	1.18e-09	0.4	7e-09	0.6	1.78e-08	0.8	3.61e-08	1	7.31e-08
	-75.2	0.2	1.63e-09	0.4	9.14e-09	0.6	2.24e-08	0.8	4.88e-08	1	9.16e-08
	-74.4	0.2	2.2e-09	0.4	1.18e-08	0.6	2.94e-08	0.8	6.22e-08	1	1.12e-07
	-73.6	0.2	2.89e-09	0.4	1.55e-08	0.6	3.84e-08	0.8	7.69e-08	1	1.34e-07
	-72.8	0.2	3.87e-09	0.4	2.01e-08	0.6	4.71e-08	0.8	9.33e-08	1	1.61e-07
	-72	0.2	4.97e-09	0.4	2.43e-08	0.6	5.91e-08	0.8	1.08e-07	1	1.97e-07
	-71.2	0.2	6.39e-09	0.4	2.91e-08	0.6	7.2e-08	0.8	1.33e-07	1	2.31e-07
	-70.4	0.2	8.07e-09	0.4	3.74e-08	0.6	8.71e-08	0.8	1.57e-07	1	2.72e-07
	-69.6	0.2	1.04e-08	0.4	4.39e-08	0.6	1.03e-07	0.8	1.83e-07	1	3.24e-07
	-68.8	0.2	1.28e-08	0.4	5.22e-08	0.6	1.19e-07	0.8	2.16e-07	1	3.72e-07
	-68	0.2	1.57e-08	0.4	6.22e-08	0.6	1.38e-07	0.8	2.54e-07	1	4.3e-07
	-67.2	0.2	1.9e-08	0.4	7.39e-08	0.6	1.6e-07	0.8	2.94e-07	1	4.96e-07
	-66.4	0.2	2.21e-08	0.4	8.8e-08	0.6	1.84e-07	0.8	3.33e-07	1	5.56e-07
	-65.6	0.2	2.65e-08	0.4	1e-07	0.6	2.17e-07	0.8	3.94e-07	1	6.42e-07
	-64.8	0.2	3.13e-08	0.4	1.17e-07	0.6	2.47e-07	0.8	4.45e-07	1	7.15e-07
	-64	0.2	3.66e-08	0.4	1.36e-07	0.6	2.83e-07	0.8	5.11e-07	1	7.99e-07
	-63.2	0.2	4.43e-08	0.4	1.56e-07	0.6	3.25e-07	0.8	5.82e-07	1	8.97e-07
	-62.4	0.2	4.96e-08	0.4	1.77e-07	0.6	3.7e-07	0.8	6.58e-07	1	1.01e-06
	-61.6	0.2	5.57e-08	0.4	2e-07	0.6	4.05e-07	0.8	7.3e-07	1	1.12e-06
	-60.8	0.2	6.35e-08	0.4	2.21e-07	0.6	4.62e-07	0.8	8.15e-07	1	1.28e-06
	-60	0.2	7.17e-08	0.4	2.49e-07	0.6	5.24e-07	0.8	9e-07	1	1.41e-06
	-59.2	0.2	8.44e-08	0.4	2.82e-07	0.6	5.59e-07	0.8	1.01e-06	1	1.55e-06
	-58.4	0.2	9.54e-08	0.4	3.12e-07	0.6	6.22e-07	0.8	1.11e-06	1	1.71e-06
	-57.6	0.2	1.07e-07	0.4	3.57e-07	0.6	7.05e-07	0.8	1.21e-06	1	1.89e-06
	-56.8	0.2	1.21e-07	0.4	3.94e-07	0.6	7.82e-07	0.8	1.32e-06	1	2.09e-06
	-56	0.2	1.32e-07	0.4	4.34e-07	0.6	8.78e-07	0.8	1.46e-06	1	2.32e-06
	-55.2	0.2	1.48e-07	0.4	4.68e-07	0.6	9.67e-07	0.8	1.57e-06	1	2.55e-06
	-54.4	0.2	1.63e-07	0.4	5.13e-07	0.6	1.06e-06	0.8	1.77e-06	1	2.76e-06
	-53.6	0.2	1.77e-07	0.4	5.68e-07	0.6	1.16e-06	0.8	1.91e-06	1	3e-06
	-52.8	0.2	2e-07	0.4	6.22e-07	0.6	1.27e-06	0.8	2.06e-06	1	3.23e-06
	-52	0.2	2.16e-07	0.4	6.77e-07	0.6	1.37e-06	0.8	2.28e-06	1	3.5e-06
	-51.2	0.2	2.38e-07	0.4	7.51e-07	0.6	1.48e-06	0.8	2.43e-06	1	3.73e-06
	-50.4	0.2	2.56e-07	0.4	8.18e-07	0.6	1.6e-06	0.8	2.63e-06	1	3.98e-06
	-49.6	0.2	2.75e-07	0.4	8.8e-07	0.6	1.73e-06	0.8	2.8e-06	1	4.3e-06
	-48.8	0.2	3.09e-07	0.4	9.45e-07	0.6	1.87e-06	0.8	3.01e-06	1	4.66e-06
	-48	0.2	3.35e-07	0.4	1.01e-06	0.6	2e-06	0.8	3.22e-06	1	5.05e-06
	-47.2	0.2	3.59e-07	0.4	1.09e-06	0.6	2.13e-06	0.8	3.52e-06	1	5.41e-06
	-46.4	0.2	3.9e-07	0.4	1.18e-06	0.6	2.29e-06	0.8	3.76e-06	1	5.85e-06
	-45.6	0.2	4.14e-07	0.4	1.27e-06	0.6	2.42e-06	0.8	4.01e-06	1	6.12e-06
	-44.8	0.2	4.39e-07	0.4	1.35e-06	0.6	2.67e-06	0.8	4.38e-06	1	6.6e-06
	-44	0.2	4.69e-07	0.4	1.44e-06	0.6	2.82e-06	0.8	4.65e-06	1	7e-06
	-43.2	0.2	5.15e-07	0.4	1.57e-06	0.6	3e-06	0.8	4.98e-06	1	7.48e-06
	-42.4	0.2	5.59e-07	0.4	1.66e-06	0.6	3.22e-06	0.8	5.24e-06	1	7.74e-06
	-41.6	0.2	6.1e-07	0.4	1.77e-06	0.6	3.42e-06	0.8	5.47e-06	1	8.35e-06
	-40.8	0.2	6.49e-07	0.4	1.88e-06	0.6	3.63e-06	0.8	5.87e-06	1	8.83e-06
	-40	0.2	6.82e-07	0.4	1.99e-06	0.6	3.81e-06	0.8	6.24e-06	1	9.3e-06
	-39.2	0.2	7.28e-07	0.4	2.14e-06	0.6	4.05e-06	0.8	6.64e-06	1	9.7e-06
	-38.4	0.2	7.82e-07	0.4	2.28e-06	0.6	4.3e-06	0.8	7.01e-06	1	1.02e-05
	-37.6	0.2	8.28e-07	0.4	2.38e-06	0.6	4.6e-06	0.8	7.37e-06	1	1.1e-05
	-36.8	0.2	8.84e-07	0.4	2.56e-06	0.6	4.88e-06	0.8	7.72e-06	1	1.15e-05
	-36	0.2	9.48e-07	0.4	2.68e-06	0.6	5.17e-06	0.8	8.14e-06	1	1.21e-05
	-35.2	0.2	9.9e-07	0.4	2.81e-06	0.6	5.44e-06	0.8	8.63e-06	1	1.28e-05
	-34.4	0.2	1.05e-06	0.4	2.97e-06	0.6	5.74e-06	0.8	9.08e-06	1	1.35e-05
	-33.6	0.2	1.11e-06	0.4	3.14e-06	0.6	5.94e-06	0.8	9.43e-06	1	1.4e-05
	-32.8	0.2	1.17e-06	0.4	3.26e-06	0.6	6.19e-06	0.8	9.89e-06	1	1.47e-05
	-32	0.2	1.21e-06	0.4	3.44e-06	0.6	6.56e-06	0.8	1.05e-05	1	1.53e-05
	-31.2	0.2	1.28e-06	0.4	3.65e-06	0.6	6.87e-06	0.8	1.1e-05	1	1.61e-05
	-30.4	0.2	1.34e-06	0.4	3.81e-06	0.6	7.25e-06	0.8	1.14e-05	1	1.69e-05
	-29.6	0.2	1.41e-06	0.4	3.99e-06	0.6	7.57e-06	0.8	1.18e-05	1	1.76e-05
	-28.8	0.2	1.49e-06	0.4	4.18e-06	0.6	8e-06	0.8	1.24e-05	1	1.84e-05
	-28	0.2	1.56e-06	0.4	4.4e-06	0.6	8.3e-06	0.8	1.31e-05	1	1.9e-05
	-27.2	0.2	1.66e-06	0.4	4.59e-06	0.6	8.74e-06	0.8	1.37e-05	1	1.99e-05
	-26.4	0.2	1.72e-06	0.4	4.79e-06	0.6	9.17e-06	0.8	1.42e-05	1	2.08e-05
	-25.6	0.2	1.81e-06	0.4	5.06e-06	0.6	9.64e-06	0.8	1.49e-05	1	2.16e-05
	-24.8	0.2	1.91e-06	0.4	5.29e-06	0.6	9.93e-06	0.8	1.54e-05	1	2.24e-05
	-24	0.2	2e-06	0.4	5.45e-06	0.6	1.05e-05	0.8	1.61e-05	1	2.33e-05
	-23.2	0.2	2.08e-06	0.4	5.75e-06	0.6	1.08e-05	0.8	1.67e-05	1	2.43e-05
	-22.4	0.2	2.18e-06	0.4	5.94e-06	0.6	1.12e-05	0.8	1.75e-05	1	2.51e-05
	-21.6	0.2	2.27e-06	0.4	6.18e-06	0.6	1.17e-05	0.8	1.82e-05	1	2.6e-05
	-20.8	0.2	2.36e-06	0.4	6.42e-06	0.6	1.22e-05	0.8	1.89e-05	1	2.7e-05
	-20	0.2	2.47e-06	0.4	6.71e-06	0.6	1.26e-05	0.8	1.97e-05	1	2.8e-05
	-19.2	0.2	2.58e-06	0.4	7.06e-06	0.6	1.32e-05	0.8	2.01e-05	1	2.91e-05
	-18.4	0.2	2.69e-06	0.4	7.31e-06	0.6	1.37e-05	0.8	2.1e-05	1	3.01e-05
	-17.6	0.2	2.78e-06	0.4	7.53e-06	0.6	1.4e-05	0.8	2.17e-05	1	3.13e-05
	-16.8	0.2	2.9e-06	0.4	7.87e-06	0.6	1.45e-05	0.8	2.25e-05	1	3.23e-05
	-16	0.2	3e-06	0.4	8.12e-06	0.6	1.51e-05	0.8	2.32e-05	1	3.33e-05
	-15.2	0.2	3.15e-06	0.4	8.5e-06	0.6	1.55e-05	0.8	2.39e-05	1	3.45e-05
	-14.4	0.2	3.24e-06	0.4	8.87e-06	0.6	1.62e-05	0.8	2.48e-05	1	3.51e-05
	-13.6	0.2	3.37e-06	0.4	9.18e-06	0.6	1.67e-05	0.8	2.57e-05	1	3.64e-05
	-12.8	0.2	3.5e-06	0.4	9.43e-06	0.6	1.74e-05	0.8	2.66e-05	1	3.73e-05
	-12	0.2	3.64e-06	0.4	9.71e-06	0.6	1.8e-05	0.8	2.76e-05	1	3.87e-05
	-11.2	0.2	3.74e-06	0.4	9.89e-06	0.6	1.86e-05	0.8	2.84e-05	1	3.98e-05
	-10.4	0.2	3.86e-06	0.4	1.03e-05	0.6	1.91e-05	0.8	2.94e-05	1	4.1e-05
	-9.6	0.2	3.97e-06	0.4	1.07e-05	0.6	1.99e-05	0.8	3.03e-05	1	4.24e-05
	-8.8	0.2	4.12e-06	0.4	1.12e-05	0.6	2.05e-05	0.8	3.11e-05	1	4.35e-05
	-8	0.2	4.28e-06	0.4	1.15e-05	0.6	2.12e-05	0.8	3.19e-05	1	4.47e-05
	-7.2	0.2	4.41e-06	0.4	1.19e-05	0.6	2.19e-05	0.8	3.3e-05	1	4.59e-05
	-6.4	0.2	4.59e-06	0.4	1.23e-05	0.6	2.25e-05	0.8	3.37e-05	1	4.71e-05
	-5.6	0.2	4.72e-06	0.4	1.27e-05	0.6	2.31e-05	0.8	3.49e-05	1	4.8e-05
	-4.8	0.2	4.91e-06	0.4	1.3e-05	0.6	2.37e-05	0.8	3.57e-05	1	4.97e-05
	-4	0.2	5.05e-06	0.4	1.34e-05	0.6	2.45e-05	0.8	3.67e-05	1	5.09e-05
	-3.2	0.2	5.21e-06	0.4	1.38e-05	0.6	2.51e-05	0.8	3.76e-05	1	5.24e-05
	-2.4	0.2	5.4e-06	0.4	1.4e-05	0.6	2.58e-05	0.8	3.85e-05	1	5.37e-05
	-1.6	0.2	5.53e-06	0.4	1.45e-05	0.6	2.67e-05	0.8	3.95e-05	1	5.47e-05
	-0.8	0.2	5.67e-06	0.4	1.5e-05	0.6	2.72e-05	0.8	4.06e-05	1	5.62e-05
	0	0.2	5.9e-06	0.4	1.54e-05	0.6	2.78e-05	0.8	4.16e-05	1	5.76e-05
	0.8	0.2	6.03e-06	0.4	1.58e-05	0.6	2.86e-05	0.8	4.26e-05	1	5.87e-05
	1.6	0.2	6.23e-06	0.4	1.62e-05	0.6	2.94e-05	0.8	4.39e-05	1	6.02e-05
	2.4	0.2	6.41e-06	0.4	1.65e-05	0.6	3.01e-05	0.8	4.48e-05	1	6.18e-05
	3.2	0.2	6.62e-06	0.4	1.7e-05	0.6	3.08e-05	0.8	4.59e-05	1	6.32e-05
	4	0.2	6.75e-06	0.4	1.74e-05	0.6	3.14e-05	0.8	4.71e-05	1	6.47e-05
	4.8	0.2	6.94e-06	0.4	1.8e-05	0.6	3.2e-05	0.8	4.82e-05	1	6.61e-05
	5.6	0.2	7.12e-06	0.4	1.85e-05	0.6	3.3e-05	0.8	4.92e-05	1	6.79e-05
	6.4	0.2	7.28e-06	0.4	1.89e-05	0.6	3.38e-05	0.8	5.02e-05	1	6.94e-05
	7.2	0.2	7.49e-06	0.4	1.94e-05	0.6	3.45e-05	0.8	5.14e-05	1	7.06e-05
	8	0.2	7.64e-06	0.4	1.99e-05	0.6	3.52e-05	0.8	5.26e-05	1	7.24e-05
	8.8	0.2	7.85e-06	0.4	2.03e-05	0.6	3.58e-05	0.8	5.39e-05	1	7.38e-05
	9.6	0.2	8.06e-06	0.4	2.07e-05	0.6	3.64e-05	0.8	5.5e-05	1	7.53e-05
	10.4	0.2	8.22e-06	0.4	2.11e-05	0.6	3.72e-05	0.8	5.64e-05	1	7.69e-05
	11.2	0.2	8.4e-06	0.4	2.17e-05	0.6	3.83e-05	0.8	5.72e-05	1	7.82e-05
	12	0.2	8.64e-06	0.4	2.21e-05	0.6	3.92e-05	0.8	5.85e-05	1	7.96e-05
	12.8	0.2	8.83e-06	0.4	2.26e-05	0.6	3.99e-05	0.8	5.96e-05	1	8.14e-05
	13.6	0.2	9.01e-06	0.4	2.31e-05	0.6	4.06e-05	0.8	6.1e-05	1	8.32e-05
	14.4	0.2	9.21e-06	0.4	2.36e-05	0.6	4.15e-05	0.8	6.2e-05	1	8.44e-05
	15.2	0.2	9.38e-06	0.4	2.42e-05	0.6	4.26e-05	0.8	6.33e-05	1	8.6e-05
	16	0.2	9.68e-06	0.4	2.48e-05	0.6	4.33e-05	0.8	6.47e-05	1	8.77e-05
	16.8	0.2	9.84e-06	0.4	2.52e-05	0.6	4.41e-05	0.8	6.59e-05	1	8.88e-05
	17.6	0.2	1.01e-05	0.4	2.57e-05	0.6	4.5e-05	0.8	6.71e-05	1	9.08e-05
	18.4	0.2	1.03e-05	0.4	2.62e-05	0.6	4.57e-05	0.8	6.85e-05	1	9.28e-05
	19.2	0.2	1.05e-05	0.4	2.67e-05	0.6	4.66e-05	0.8	6.96e-05	1	9.43e-05
	20	0.2	1.07e-05	0.4	2.72e-05	0.6	4.76e-05	0.8	7.1e-05	1	9.64e-05
	20.8	0.2	1.1e-05	0.4	2.79e-05	0.6	4.83e-05	0.8	7.21e-05	1	9.79e-05
	21.6	0.2	1.12e-05	0.4	2.84e-05	0.6	4.91e-05	0.8	7.31e-05	1	9.96e-05
	22.4	0.2	1.14e-05	0.4	2.88e-05	0.6	5.01e-05	0.8	7.41e-05	1	0.000101
	23.2	0.2	1.17e-05	0.4	2.93e-05	0.6	5.09e-05	0.8	7.56e-05	1	0.000103
	24	0.2	1.18e-05	0.4	3.01e-05	0.6	5.2e-05	0.8	7.7e-05	1	0.000105
	24.8	0.2	1.21e-05	0.4	3.05e-05	0.6	5.3e-05	0.8	7.82e-05	1	0.000106
	25.6	0.2	1.23e-05	0.4	3.1e-05	0.6	5.4e-05	0.8	7.93e-05	1	0.000108
	26.4	0.2	1.26e-05	0.4	3.14e-05	0.6	5.45e-05	0.8	8.07e-05	1	0.00011
	27.2	0.2	1.28e-05	0.4	3.22e-05	0.6	5.56e-05	0.8	8.21e-05	1	0.000112
	28	0.2	1.31e-05	0.4	3.27e-05	0.6	5.66e-05	0.8	8.32e-05	1	0.000113
	28.8	0.2	1.32e-05	0.4	3.33e-05	0.6	5.73e-05	0.8	8.48e-05	1	0.000115
	29.6	0.2	1.35e-05	0.4	3.37e-05	0.6	5.83e-05	0.8	8.6e-05	1	0.000117
	30.4	0.2	1.37e-05	0.4	3.42e-05	0.6	5.92e-05	0.8	8.75e-05	1	0.000119
	31.2	0.2	1.4e-05	0.4	3.5e-05	0.6	6.02e-05	0.8	8.88e-05	1	0.00012
	32	0.2	1.42e-05	0.4	3.55e-05	0.6	6.12e-05	0.8	9e-05	1	0.000122
	32.8	0.2	1.44e-05	0.4	3.62e-05	0.6	6.2e-05	0.8	9.12e-05	1	0.000123
	33.6	0.2	1.47e-05	0.4	3.65e-05	0.6	6.32e-05	0.8	9.25e-05	1	0.000125
	34.4	0.2	1.48e-05	0.4	3.71e-05	0.6	6.41e-05	0.8	9.4e-05	1	0.000127
	35.2	0.2	1.51e-05	0.4	3.76e-05	0.6	6.51e-05	0.8	9.53e-05	1	0.000128
	36	0.2	1.54e-05	0.4	3.82e-05	0.6	6.59e-05	0.8	9.67e-05	1	0.00013
	36.8	0.2	1.56e-05	0.4	3.88e-05	0.6	6.67e-05	0.8	9.81e-05	1	0.000132
	37.6	0.2	1.6e-05	0.4	3.95e-05	0.6	6.78e-05	0.8	9.93e-05	1	0.000133
	38.4	0.2	1.63e-05	0.4	3.99e-05	0.6	6.88e-05	0.8	0.000101	1	0.000136
	39.2	0.2	1.64e-05	0.4	4.06e-05	0.6	6.96e-05	0.8	0.000102	1	0.000137
	40	0.2	1.68e-05	0.4	4.12e-05	0.6	7.08e-05	0.8	0.000103	1	0.000138
	40.8	0.2	1.71e-05	0.4	4.18e-05	0.6	7.17e-05	0.8	0.000105	1	0.00014
	41.6	0.2	1.74e-05	0.4	4.24e-05	0.6	7.26e-05	0.8	0.000106	1	0.000143
	42.4	0.2	1.76e-05	0.4	4.29e-05	0.6	7.37e-05	0.8	0.000107	1	0.000144
	43.2	0.2	1.79e-05	0.4	4.33e-05	0.6	7.42e-05	0.8	0.000109	1	0.000146
	44	0.2	1.81e-05	0.4	4.39e-05	0.6	7.54e-05	0.8	0.00011	1	0.000148
	44.8	0.2	1.84e-05	0.4	4.45e-05	0.6	7.64e-05	0.8	0.000111	1	0.000149
	45.6	0.2	1.86e-05	0.4	4.51e-05	0.6	7.76e-05	0.8	0.000113	1	0.000151
	46.4	0.2	1.89e-05	0.4	4.57e-05	0.6	7.87e-05	0.8	0.000114	1	0.000153
	47.2	0.2	1.91e-05	0.4	4.62e-05	0.6	7.95e-05	0.8	0.000115	1	0.000154
	48	0.2	1.94e-05	0.4	4.71e-05	0.6	8.08e-05	0.8	0.000117	1	0.000156
	48.8	0.2	1.97e-05	0.4	4.75e-05	0.6	8.14e-05	0.8	0.000118	1	0.000158
	49.6	0.2	1.99e-05	0.4	4.82e-05	0.6	8.24e-05	0.8	0.000119	1	0.00016
	50.4	0.2	2.02e-05	0.4	4.88e-05	0.6	8.36e-05	0.8	0.000121	1	0.000162
	51.2	0.2	2.05e-05	0.4	4.92e-05	0.6	8.45e-05	0.8	0.000122	1	0.000163
	52	0.2	2.07e-05	0.4	4.97e-05	0.6	8.54e-05	0.8	0.000123	1	0.000165
	52.8	0.2	2.1e-05	0.4	5.03e-05	0.6	8.65e-05	0.8	0.000125	1	0.000167
	53.6	0.2	2.13e-05	0.4	5.1e-05	0.6	8.75e-05	0.8	0.000126	1	0.000169
	54.4	0.2	2.15e-05	0.4	5.14e-05	0.6	8.84e-05	0.8	0.000128	1	0.000171
	55.2	0.2	2.18e-05	0.4	5.21e-05	0.6	8.94e-05	0.8	0.000129	1	0.000172
	56	0.2	2.21e-05	0.4	5.28e-05	0.6	9.04e-05	0.8	0.00013	1	0.000174
	56.8	0.2	2.23e-05	0.4	5.32e-05	0.6	9.14e-05	0.8	0.000132	1	0.000176
	57.6	0.2	2.26e-05	0.4	5.4e-05	0.6	9.26e-05	0.8	0.000133	1	0.000178
	58.4	0.2	2.3e-05	0.4	5.46e-05	0.6	9.38e-05	0.8	0.000135	1	0.00018
	59.2	0.2	2.32e-05	0.4	5.52e-05	0.6	9.47e-05	0.8	0.000136	1	0.000181
	60	0.2	2.34e-05	0.4	5.57e-05	0.6	9.59e-05	0.8	0.000137	1	0.000183

## Sheet: F3c
		Vgs=-60V	-50	-40	-30	-20	-10	0	10	20	30	40	50	60		插图	Vgs=-60V	-50	-40	-30	-20	-10	0	10	20	30	40	50	60
F3c	Vds (V)	Ids (A/μm)	Ids (A/μm)	Ids (A/μm)	Ids (A/μm)	Ids (A/μm)	Ids (A/μm)	Ids (A/μm)	Ids (A/μm)	Ids (A/μm)	Ids (A/μm)	Ids (A/μm)	Ids (A/μm)	Ids (A/μm)		Vds	Ids (A/μm)	Ids (A/μm)	Ids (A/μm)	Ids (A/μm)	Ids (A/μm)	Ids (A/μm)	Ids (A/μm)	Ids (A/μm)	Ids (A/μm)	Ids (A/μm)	Ids (A/μm)	Ids (A/μm)	Ids (A/μm)
	0	1.62857e-10	1.58571e-11	-1.16429e-10	6.88571e-11	2e-10	-4.92857e-12	-1.32143e-10	6.29286e-11	-1.6e-10	-7.5e-11	-9.14286e-11	-3.24286e-10	-1.62857e-10		-1.1	-1.41e-05	-3.48e-05	-5.47e-05	-7.7e-05	-0.000102	-0.000129	-0.000159	-0.00019	-0.000222	-0.000254	-0.000287	-0.00032	-0.000355
	0.0138	1.91429e-06	2.2e-06	2.37143e-06	2.57143e-06	2.7e-06	2.89286e-06	3.07857e-06	3.28571e-06	3.52857e-06	3.63571e-06	3.82143e-06	4.07143e-06	4.28571e-06		-1.09	-1.4e-05	-3.41e-05	-5.35e-05	-7.61e-05	-0.000101	-0.000128	-0.000157	-0.000187	-0.000219	-0.000251	-0.000284	-0.000316	-0.00035
	0.0273	3.80714e-06	4.32857e-06	4.71429e-06	5.11429e-06	5.32857e-06	5.7e-06	6.10714e-06	6.47143e-06	6.96429e-06	7.21429e-06	7.57143e-06	8.07143e-06	8.5e-06		-1.08	-1.42e-05	-3.37e-05	-5.28e-05	-7.49e-05	-9.92e-05	-0.000127	-0.000156	-0.000185	-0.000217	-0.000249	-0.000282	-0.000313	-0.000347
	0.041	5.72143e-06	6.57857e-06	7.14286e-06	7.71429e-06	8e-06	8.64286e-06	9.21429e-06	9.78571e-06	1.05e-05	1.08571e-05	1.14286e-05	1.21429e-05	1.27857e-05		-1.07	-1.42e-05	-3.32e-05	-5.24e-05	-7.39e-05	-9.8e-05	-0.000125	-0.000154	-0.000183	-0.000214	-0.000246	-0.000278	-0.00031	-0.000344
	0.0545	7.71429e-06	8.78571e-06	9.5e-06	1.02857e-05	1.06429e-05	1.15714e-05	1.22857e-05	1.30714e-05	1.4e-05	1.44286e-05	1.52143e-05	1.62143e-05	1.70714e-05		-1.06	-1.37e-05	-3.3e-05	-5.17e-05	-7.32e-05	-9.67e-05	-0.000124	-0.000152	-0.000181	-0.000212	-0.000244	-0.000275	-0.000307	-0.00034
	0.0683	9.64286e-06	1.10714e-05	1.2e-05	1.28571e-05	1.33571e-05	1.44286e-05	1.54286e-05	1.63571e-05	1.75714e-05	1.81429e-05	1.90714e-05	2.02857e-05	2.12857e-05		-1.05	-1.39e-05	-3.26e-05	-5.12e-05	-7.19e-05	-9.58e-05	-0.000122	-0.000151	-0.000179	-0.00021	-0.000241	-0.000272	-0.000304	-0.000337
	0.0818	1.17857e-05	1.32143e-05	1.44286e-05	1.55714e-05	1.61429e-05	1.74286e-05	1.85714e-05	1.97143e-05	2.11429e-05	2.17857e-05	2.28571e-05	2.43571e-05	2.55714e-05		-1.04	-1.37e-05	-3.21e-05	-5.05e-05	-7.1e-05	-9.47e-05	-0.000121	-0.000149	-0.000177	-0.000207	-0.000238	-0.000269	-0.0003	-0.000333
	0.0955	1.38571e-05	1.55714e-05	1.7e-05	1.82143e-05	1.89286e-05	2.05e-05	2.17143e-05	2.31429e-05	2.47143e-05	2.55714e-05	2.67857e-05	2.85714e-05	3e-05		-1.03	-1.36e-05	-3.17e-05	-5.05e-05	-7.01e-05	-9.38e-05	-0.00012	-0.000147	-0.000175	-0.000205	-0.000235	-0.000266	-0.000296	-0.000329
	0.109	1.58571e-05	1.79286e-05	1.95e-05	2.1e-05	2.15714e-05	2.34286e-05	2.48571e-05	2.65e-05	2.84286e-05	2.92857e-05	3.07143e-05	3.27143e-05	3.42857e-05		-1.02	-1.37e-05	-3.11e-05	-4.93e-05	-6.97e-05	-9.28e-05	-0.000119	-0.000146	-0.000173	-0.000202	-0.000232	-0.000263	-0.000293	-0.000326
	0.123	1.79286e-05	2.03571e-05	2.2e-05	2.37857e-05	2.44286e-05	2.64286e-05	2.80714e-05	3e-05	3.20714e-05	3.30714e-05	3.47143e-05	3.69286e-05	3.87857e-05		-1.01	-1.31e-05	-3.08e-05	-4.89e-05	-6.83e-05	-9.13e-05	-0.000117	-0.000144	-0.000171	-0.0002	-0.00023	-0.00026	-0.00029	-0.000322
	0.136	2.01429e-05	2.27857e-05	2.46429e-05	2.66429e-05	2.72857e-05	2.95e-05	3.13571e-05	3.35e-05	3.56429e-05	3.67857e-05	3.86429e-05	4.10714e-05	4.30714e-05		-1	-1.31e-05	-3.03e-05	-4.84e-05	-6.78e-05	-9.03e-05	-0.000115	-0.000142	-0.000169	-0.000198	-0.000227	-0.000258	-0.000287	-0.000319
	0.15	2.22857e-05	2.52857e-05	2.72857e-05	2.94286e-05	3.02143e-05	3.26429e-05	3.47143e-05	3.7e-05	3.95714e-05	4.07143e-05	4.27143e-05	4.52857e-05	4.76429e-05		-0.99	-1.33e-05	-2.98e-05	-4.74e-05	-6.7e-05	-8.91e-05	-0.000114	-0.000141	-0.000167	-0.000196	-0.000225	-0.000254	-0.000284	-0.000315
	0.164	2.47857e-05	2.77143e-05	3.00714e-05	3.21429e-05	3.3e-05	3.56429e-05	3.79286e-05	4.04286e-05	4.32143e-05	4.45714e-05	4.66429e-05	4.95e-05	5.21429e-05		-0.98	-1.31e-05	-2.94e-05	-4.68e-05	-6.61e-05	-8.82e-05	-0.000112	-0.000139	-0.000165	-0.000193	-0.000222	-0.000251	-0.00028	-0.000311
	0.177	2.7e-05	3.03571e-05	3.27143e-05	3.51429e-05	3.6e-05	3.87857e-05	4.12857e-05	4.39286e-05	4.69286e-05	4.85e-05	5.07857e-05	5.37857e-05	5.66429e-05		-0.97	-1.31e-05	-2.92e-05	-4.61e-05	-6.53e-05	-8.72e-05	-0.000111	-0.000137	-0.000163	-0.000191	-0.00022	-0.000248	-0.000277	-0.000308
	0.191	2.93571e-05	3.3e-05	3.54286e-05	3.82143e-05	3.90714e-05	4.2e-05	4.46429e-05	4.75714e-05	5.07857e-05	5.22143e-05	5.48571e-05	5.82143e-05	6.12143e-05		-0.96	-1.28e-05	-2.87e-05	-4.57e-05	-6.46e-05	-8.61e-05	-0.00011	-0.000135	-0.000161	-0.000189	-0.000217	-0.000246	-0.000274	-0.000304
	0.205	3.17857e-05	3.55e-05	3.82857e-05	4.10714e-05	4.21429e-05	4.53571e-05	4.81429e-05	5.11429e-05	5.45e-05	5.60714e-05	5.89286e-05	6.25714e-05	6.57143e-05		-0.95	-1.26e-05	-2.84e-05	-4.49e-05	-6.38e-05	-8.52e-05	-0.000109	-0.000134	-0.000159	-0.000187	-0.000214	-0.000243	-0.000271	-0.0003
	0.218	3.43571e-05	3.8e-05	4.12143e-05	4.40714e-05	4.50714e-05	4.85e-05	5.16429e-05	5.49286e-05	5.85e-05	6.00714e-05	6.3e-05	6.7e-05	7.05e-05		-0.94	-1.25e-05	-2.82e-05	-4.44e-05	-6.28e-05	-8.41e-05	-0.000107	-0.000132	-0.000157	-0.000184	-0.000212	-0.00024	-0.000267	-0.000297
	0.232	3.69286e-05	4.08571e-05	4.41429e-05	4.71429e-05	4.81429e-05	5.18571e-05	5.52143e-05	5.85e-05	6.22857e-05	6.40714e-05	6.72857e-05	7.14286e-05	7.5e-05		-0.93	-1.23e-05	-2.78e-05	-4.4e-05	-6.23e-05	-8.31e-05	-0.000106	-0.00013	-0.000156	-0.000182	-0.000209	-0.000237	-0.000264	-0.000293
	0.246	3.94286e-05	4.33571e-05	4.7e-05	5.03571e-05	5.12857e-05	5.52143e-05	5.87143e-05	6.23571e-05	6.63571e-05	6.82857e-05	7.14286e-05	7.57143e-05	8e-05		-0.92	-1.22e-05	-2.74e-05	-4.29e-05	-6.12e-05	-8.15e-05	-0.000104	-0.000129	-0.000154	-0.00018	-0.000207	-0.000234	-0.00026	-0.00029
	0.259	4.2e-05	4.62143e-05	5.00714e-05	5.36429e-05	5.44286e-05	5.87143e-05	6.23571e-05	6.59286e-05	7.01429e-05	7.28571e-05	7.57143e-05	8e-05	8.42857e-05		-0.91	-1.21e-05	-2.68e-05	-4.25e-05	-6.04e-05	-8.05e-05	-0.000103	-0.000127	-0.000152	-0.000177	-0.000205	-0.000231	-0.000258	-0.000286
	0.273	4.47143e-05	4.92857e-05	5.32857e-05	5.68571e-05	5.80714e-05	6.21429e-05	6.60714e-05	6.97857e-05	7.42857e-05	7.71429e-05	8e-05	8.5e-05	8.92857e-05		-0.9	-1.2e-05	-2.63e-05	-4.18e-05	-5.94e-05	-7.95e-05	-0.000101	-0.000125	-0.000149	-0.000175	-0.000202	-0.000229	-0.000255	-0.000283
	0.286	4.74286e-05	5.20714e-05	5.64286e-05	6.00714e-05	6.13571e-05	6.55e-05	6.95714e-05	7.35714e-05	7.85714e-05	8.07143e-05	8.42857e-05	8.92857e-05	9.42857e-05		-0.89	-1.19e-05	-2.59e-05	-4.09e-05	-5.86e-05	-7.83e-05	-0.0001	-0.000124	-0.000148	-0.000173	-0.0002	-0.000226	-0.000251	-0.000279
	0.3	5.02143e-05	5.51429e-05	5.95e-05	6.35e-05	6.45714e-05	6.88571e-05	7.35714e-05	7.78571e-05	8.28571e-05	8.5e-05	8.92857e-05	9.42857e-05	9.85714e-05		-0.88	-1.18e-05	-2.55e-05	-4.05e-05	-5.81e-05	-7.75e-05	-9.91e-05	-0.000122	-0.000146	-0.000171	-0.000197	-0.000223	-0.000249	-0.000276
	0.314	5.32857e-05	5.82857e-05	6.26429e-05	6.67143e-05	6.8e-05	7.28571e-05	7.71429e-05	8.14286e-05	8.64286e-05	8.92857e-05	9.35714e-05	9.85714e-05	0.000103571		-0.87	-1.16e-05	-2.5e-05	-3.98e-05	-5.74e-05	-7.65e-05	-9.77e-05	-0.000121	-0.000144	-0.000169	-0.000194	-0.00022	-0.000246	-0.000272
	0.327	5.61429e-05	6.12143e-05	6.59286e-05	7.00714e-05	7.1e-05	7.64286e-05	8.07143e-05	8.57143e-05	9.07143e-05	9.35714e-05	9.78571e-05	0.000103571	0.000108571		-0.86	-1.16e-05	-2.46e-05	-3.91e-05	-5.64e-05	-7.56e-05	-9.62e-05	-0.000119	-0.000142	-0.000166	-0.000192	-0.000217	-0.000242	-0.000268
	0.341	5.95e-05	6.46429e-05	6.92143e-05	7.35714e-05	7.42857e-05	8e-05	8.5e-05	9e-05	9.5e-05	9.78571e-05	0.000102143	0.000107857	0.000113571		-0.85	-1.15e-05	-2.4e-05	-3.84e-05	-5.54e-05	-7.47e-05	-9.52e-05	-0.000118	-0.00014	-0.000164	-0.000189	-0.000214	-0.000238	-0.000265
	0.355	6.19286e-05	6.78571e-05	7.21429e-05	7.71429e-05	7.85714e-05	8.35714e-05	8.85714e-05	9.35714e-05	9.92857e-05	0.000102143	0.000107143	0.000112857	0.000117857		-0.84	-1.12e-05	-2.38e-05	-3.83e-05	-5.46e-05	-7.34e-05	-9.4e-05	-0.000116	-0.000138	-0.000162	-0.000187	-0.000212	-0.000235	-0.000262
	0.368	6.54286e-05	7.10714e-05	7.64286e-05	8.07143e-05	8.21429e-05	8.78571e-05	9.21429e-05	9.78571e-05	0.000103571	0.000106429	0.000111429	0.000117857	0.000123571		-0.83	-1.1e-05	-2.37e-05	-3.8e-05	-5.38e-05	-7.25e-05	-9.28e-05	-0.000114	-0.000137	-0.00016	-0.000184	-0.000209	-0.000232	-0.000258
	0.382	6.84286e-05	7.42857e-05	7.92857e-05	8.42857e-05	8.57143e-05	9.14286e-05	9.57143e-05	0.000102143	0.000107857	0.000110714	0.000115714	0.000122143	0.000128571		-0.82	-1.08e-05	-2.33e-05	-3.71e-05	-5.31e-05	-7.14e-05	-9.12e-05	-0.000113	-0.000135	-0.000158	-0.000181	-0.000206	-0.000229	-0.000254
	0.396	7.14286e-05	7.71429e-05	8.28571e-05	8.78571e-05	8.92857e-05	9.57143e-05	0.000100714	0.000105714	0.000112143	0.000115714	0.000120714	0.000127857	0.000133571		-0.81	-1.07e-05	-2.3e-05	-3.67e-05	-5.23e-05	-7.03e-05	-9e-05	-0.000111	-0.000133	-0.000156	-0.000179	-0.000203	-0.000226	-0.000251
	0.409	7.5e-05	8.07143e-05	8.64286e-05	9.14286e-05	9.28571e-05	9.92857e-05	0.000104286	0.00011	0.000116429	0.00012	0.000125	0.000132143	0.000138571		-0.8	-1.05e-05	-2.26e-05	-3.59e-05	-5.17e-05	-6.93e-05	-8.86e-05	-0.000109	-0.000131	-0.000154	-0.000177	-0.0002	-0.000223	-0.000247
	0.423	7.78571e-05	8.42857e-05	9e-05	9.5e-05	9.71429e-05	0.000102857	0.000107857	0.000114286	0.000120714	0.000124286	0.00013	0.000137143	0.000143571		-0.79	-1.04e-05	-2.22e-05	-3.55e-05	-5.09e-05	-6.83e-05	-8.78e-05	-0.000108	-0.000129	-0.000152	-0.000174	-0.000197	-0.000219	-0.000244
	0.436	8.14286e-05	8.71429e-05	9.35714e-05	9.85714e-05	0.000100714	0.000107143	0.000112143	0.000118571	0.000125	0.000128571	0.000135	0.000142143	0.000148571		-0.78	-1.03e-05	-2.18e-05	-3.51e-05	-5.03e-05	-6.74e-05	-8.64e-05	-0.000106	-0.000127	-0.000149	-0.000172	-0.000194	-0.000217	-0.00024
	0.45	8.5e-05	9.07143e-05	9.71429e-05	0.000102857	0.000104286	0.000110714	0.000116429	0.000122857	0.000129286	0.000133571	0.000139286	0.000146429	0.000153571		-0.77	-1.01e-05	-2.15e-05	-3.43e-05	-4.94e-05	-6.62e-05	-8.52e-05	-0.000105	-0.000125	-0.000147	-0.000169	-0.000191	-0.000213	-0.000237
	0.464	8.85714e-05	9.42857e-05	0.000100714	0.000106429	0.000108571	0.000115	0.000120714	0.000127143	0.000134286	0.000137857	0.000144286	0.000151429	0.000159286		-0.76	-9.96e-06	-2.1e-05	-3.4e-05	-4.87e-05	-6.54e-05	-8.4e-05	-0.000103	-0.000123	-0.000145	-0.000167	-0.000188	-0.00021	-0.000233
	0.477	9.21429e-05	9.78571e-05	0.000104286	0.000110714	0.000112143	0.000119286	0.000124286	0.000130714	0.000138571	0.000142857	0.000149286	0.000156429	0.000164286		-0.75	-9.87e-06	-2.07e-05	-3.33e-05	-4.79e-05	-6.42e-05	-8.28e-05	-0.000102	-0.000121	-0.000142	-0.000164	-0.000185	-0.000207	-0.00023
	0.491	9.57143e-05	0.000101429	0.000108571	0.000114286	0.000115714	0.000123571	0.000128571	0.000135714	0.000142857	0.000147143	0.000153571	0.000161429	0.00017		-0.74	-9.55e-06	-2.03e-05	-3.29e-05	-4.71e-05	-6.34e-05	-8.14e-05	-0.0001	-0.00012	-0.000141	-0.000162	-0.000183	-0.000204	-0.000227
	0.505	9.85714e-05	0.000105	0.000111429	0.000117857	0.00012	0.000127143	0.000132857	0.00014	0.000147143	0.000152143	0.000158571	0.000166429	0.000175		-0.73	-9.28e-06	-1.99e-05	-3.24e-05	-4.62e-05	-6.25e-05	-7.99e-05	-9.86e-05	-0.000118	-0.000138	-0.00016	-0.00018	-0.000201	-0.000223
	0.518	0.000102143	0.000108571	0.000115	0.000122143	0.000124286	0.000131429	0.000137143	0.000144286	0.000152143	0.000156429	0.000163571	0.000172143	0.00018		-0.72	-9.14e-06	-1.95e-05	-3.15e-05	-4.56e-05	-6.15e-05	-7.89e-05	-9.72e-05	-0.000116	-0.000136	-0.000157	-0.000177	-0.000198	-0.00022
	0.532	0.000105714	0.000112143	0.000119286	0.000125714	0.000127857	0.000135714	0.000141429	0.000149286	0.000156429	0.000161429	0.000168571	0.000177143	0.000185714		-0.71	-9.03e-06	-1.94e-05	-3.14e-05	-4.48e-05	-6.07e-05	-7.74e-05	-9.58e-05	-0.000114	-0.000134	-0.000155	-0.000175	-0.000195	-0.000217
	0.546	0.00011	0.000115714	0.000122857	0.00013	0.000131429	0.000139286	0.000145714	0.000153571	0.000161429	0.000166429	0.000173571	0.000182143	0.000190714		-0.7	-8.9e-06	-1.89e-05	-3.06e-05	-4.41e-05	-5.92e-05	-7.67e-05	-9.42e-05	-0.000112	-0.000132	-0.000153	-0.000171	-0.000192	-0.000214
	0.559	0.000113571	0.000119286	0.000127143	0.000133571	0.000135714	0.000144286	0.00015	0.000157857	0.000165714	0.000170714	0.000178571	0.000187143	0.000195714		-0.69	-8.68e-06	-1.86e-05	-3e-05	-4.33e-05	-5.83e-05	-7.54e-05	-9.28e-05	-0.000111	-0.00013	-0.00015	-0.000169	-0.000189	-0.00021
	0.573	0.000117143	0.000123571	0.000131429	0.000137143	0.00014	0.000147857	0.000154286	0.000162143	0.000170714	0.000175714	0.000183571	0.000192143	0.000200714		-0.68	-8.49e-06	-1.83e-05	-2.95e-05	-4.27e-05	-5.73e-05	-7.4e-05	-9.12e-05	-0.000109	-0.000128	-0.000148	-0.000167	-0.000186	-0.000206
	0.586	0.000120714	0.000127857	0.000135	0.000141429	0.000144286	0.000152143	0.000159286	0.000166429	0.000175714	0.00018	0.000188571	0.000197857	0.000206429		-0.67	-8.41e-06	-1.8e-05	-2.88e-05	-4.19e-05	-5.64e-05	-7.27e-05	-8.99e-05	-0.000107	-0.000126	-0.000145	-0.000164	-0.000183	-0.000203
	0.6	0.000125	0.000131429	0.000139286	0.000145714	0.000147857	0.000156429	0.000162857	0.000171429	0.00018	0.000185	0.000192857	0.000202857	0.000211429		-0.66	-8.15e-06	-1.76e-05	-2.85e-05	-4.12e-05	-5.54e-05	-7.16e-05	-8.84e-05	-0.000105	-0.000124	-0.000143	-0.000161	-0.00018	-0.0002
	0.614	0.000128571	0.000135	0.000142857	0.00015	0.000152143	0.000160714	0.000167857	0.000175714	0.000184286	0.00019	0.000198571	0.000207857	0.000217143		-0.65	-8e-06	-1.73e-05	-2.81e-05	-4.05e-05	-5.43e-05	-7.04e-05	-8.7e-05	-0.000104	-0.000121	-0.00014	-0.000158	-0.000177	-0.000196
	0.627	0.000132143	0.000139286	0.000147143	0.000154286	0.000156429	0.000164286	0.000171429	0.00018	0.000189286	0.000194286	0.000203571	0.000212857	0.000222143		-0.64	-7.84e-06	-1.7e-05	-2.74e-05	-3.97e-05	-5.34e-05	-6.93e-05	-8.55e-05	-0.000102	-0.000119	-0.000138	-0.000156	-0.000174	-0.000193
	0.641	0.000136429	0.000143571	0.000150714	0.000158571	0.00016	0.000169286	0.000176429	0.000185	0.000193571	0.000199286	0.000208571	0.000218571	0.000227857		-0.63	-7.62e-06	-1.67e-05	-2.67e-05	-3.93e-05	-5.25e-05	-6.81e-05	-8.41e-05	-0.0001	-0.000117	-0.000136	-0.000153	-0.00017	-0.00019
	0.655	0.00014	0.000147143	0.000154286	0.000162857	0.000164286	0.000173571	0.000180714	0.000189286	0.000198571	0.000204286	0.000213571	0.000223571	0.000233571		-0.62	-7.48e-06	-1.64e-05	-2.62e-05	-3.84e-05	-5.16e-05	-6.68e-05	-8.22e-05	-9.83e-05	-0.000115	-0.000133	-0.00015	-0.000167	-0.000187
	0.668	0.000143571	0.000150714	0.000158571	0.000167143	0.000168571	0.000177143	0.000185	0.000194286	0.000202857	0.000209286	0.000218571	0.000228571	0.000239286		-0.61	-7.46e-06	-1.6e-05	-2.58e-05	-3.78e-05	-5.09e-05	-6.55e-05	-8.08e-05	-9.65e-05	-0.000113	-0.000131	-0.000147	-0.000165	-0.000183
	0.682	0.000147857	0.000154286	0.000162857	0.000170714	0.000172857	0.000182143	0.000189286	0.000198571	0.000207857	0.000213571	0.000223571	0.000234286	0.000244286		-0.6	-7.3e-06	-1.57e-05	-2.51e-05	-3.7e-05	-5.01e-05	-6.44e-05	-7.93e-05	-9.47e-05	-0.000111	-0.000128	-0.000145	-0.000161	-0.00018
	0.696	0.000151429	0.000158571	0.000166429	0.000175	0.000177143	0.000185714	0.000193571	0.000202857	0.000212143	0.000219286	0.000228571	0.000239286	0.00025		-0.59	-7.11e-06	-1.54e-05	-2.46e-05	-3.63e-05	-4.89e-05	-6.31e-05	-7.79e-05	-9.31e-05	-0.000109	-0.000126	-0.000142	-0.000158	-0.000177
	0.709	0.000155714	0.000162143	0.000170714	0.000179286	0.000181429	0.000190714	0.000198571	0.000207143	0.000217143	0.000224286	0.000233571	0.000244286	0.000255		-0.58	-6.95e-06	-1.49e-05	-2.42e-05	-3.57e-05	-4.82e-05	-6.18e-05	-7.63e-05	-9.14e-05	-0.000107	-0.000124	-0.000139	-0.000155	-0.000173
	0.723	0.00016	0.000166429	0.000175	0.000182857	0.000185714	0.000195	0.000202857	0.000212143	0.000221429	0.000229286	0.000239286	0.00025	0.00026		-0.57	-6.81e-06	-1.48e-05	-2.38e-05	-3.48e-05	-4.72e-05	-6.08e-05	-7.49e-05	-8.95e-05	-0.000105	-0.000121	-0.000137	-0.000152	-0.00017
	0.736	0.000163571	0.00017	0.000178571	0.000187143	0.000189286	0.000199286	0.000207143	0.000217143	0.000226429	0.000233571	0.000244286	0.000255	0.000265714		-0.56	-6.66e-06	-1.43e-05	-2.34e-05	-3.43e-05	-4.61e-05	-5.95e-05	-7.37e-05	-8.8e-05	-0.000103	-0.000119	-0.000134	-0.00015	-0.000167
	0.75	0.000167857	0.000174286	0.000182857	0.000192143	0.000194286	0.000203571	0.000211429	0.000221429	0.000231429	0.000238571	0.000249286	0.00026	0.000271429		-0.55	-6.47e-06	-1.41e-05	-2.29e-05	-3.36e-05	-4.52e-05	-5.84e-05	-7.21e-05	-8.63e-05	-0.000101	-0.000117	-0.000131	-0.000146	-0.000163
	0.764	0.000171429	0.000177857	0.000186429	0.000196429	0.000198571	0.000208571	0.000216429	0.000225714	0.000235714	0.000242857	0.000254286	0.000265	0.000276429		-0.54	-6.37e-06	-1.38e-05	-2.25e-05	-3.26e-05	-4.45e-05	-5.72e-05	-7.07e-05	-8.45e-05	-9.91e-05	-0.000114	-0.000129	-0.000144	-0.00016
	0.777	0.000175714	0.000182857	0.000190714	0.000200714	0.000202143	0.000212857	0.000220714	0.000230714	0.000240714	0.000248571	0.00026	0.000270714	0.000282143		-0.53	-6.17e-06	-1.35e-05	-2.21e-05	-3.2e-05	-4.37e-05	-5.58e-05	-6.93e-05	-8.28e-05	-9.7e-05	-0.000112	-0.000126	-0.00014	-0.000157
	0.791	0.000179286	0.000187143	0.000195	0.000204286	0.000207143	0.000217143	0.000225714	0.000235714	0.000245714	0.000253571	0.000264286	0.000275714	0.000287857		-0.52	-6.06e-06	-1.31e-05	-2.15e-05	-3.14e-05	-4.25e-05	-5.47e-05	-6.8e-05	-8.13e-05	-9.47e-05	-0.00011	-0.000124	-0.000138	-0.000154
	0.805	0.000182857	0.000191429	0.000199286	0.000208571	0.000211429	0.000221429	0.000229286	0.00024	0.00025	0.000257857	0.000269286	0.000280714	0.000293571		-0.51	-5.83e-06	-1.28e-05	-2.12e-05	-3.08e-05	-4.16e-05	-5.34e-05	-6.65e-05	-7.94e-05	-9.3e-05	-0.000107	-0.000121	-0.000135	-0.00015
	0.818	0.000186429	0.000195	0.000202857	0.000213571	0.000215714	0.000225714	0.000234286	0.000244286	0.000255	0.000262857	0.000274286	0.000285714	0.000299286		-0.5	-5.73e-06	-1.25e-05	-2.06e-05	-3.02e-05	-4.07e-05	-5.24e-05	-6.52e-05	-7.79e-05	-9.09e-05	-0.000105	-0.000118	-0.000132	-0.000147
	0.832	0.000191429	0.000199286	0.000206429	0.000217857	0.000220714	0.00023	0.000239286	0.000249286	0.00026	0.000267143	0.00028	0.000291429	0.000303571		-0.49	-5.68e-06	-1.22e-05	-2.01e-05	-2.95e-05	-3.96e-05	-5.14e-05	-6.38e-05	-7.63e-05	-8.89e-05	-0.000103	-0.000116	-0.000129	-0.000144
	0.846	0.000195	0.000202857	0.000211429	0.000222143	0.000224286	0.000235	0.000242857	0.000254286	0.000264286	0.000272143	0.000285	0.000295714	0.000309286		-0.48	-5.51e-06	-1.19e-05	-1.95e-05	-2.89e-05	-3.89e-05	-5.04e-05	-6.25e-05	-7.45e-05	-8.71e-05	-0.000101	-0.000113	-0.000126	-0.000141
	0.859	0.000198571	0.000206429	0.000215714	0.000225714	0.000228571	0.000239286	0.000247143	0.000259286	0.000268571	0.000277143	0.00029	0.000301429	0.000315		-0.47	-5.31e-06	-1.17e-05	-1.91e-05	-2.83e-05	-3.8e-05	-4.92e-05	-6.1e-05	-7.3e-05	-8.52e-05	-9.85e-05	-0.000111	-0.000123	-0.000138
	0.873	0.000202143	0.00021	0.000219286	0.00023	0.000232857	0.000243571	0.000252143	0.000262857	0.000274286	0.000282143	0.000295	0.000307143	0.00032		-0.46	-5.27e-06	-1.12e-05	-1.87e-05	-2.76e-05	-3.72e-05	-4.82e-05	-5.96e-05	-7.12e-05	-8.33e-05	-9.61e-05	-0.000108	-0.000121	-0.000134
	0.886	0.000205714	0.000214286	0.000223571	0.000234286	0.000236429	0.000247857	0.000256429	0.000267857	0.000279286	0.000286429	0.0003	0.000312143	0.000325		-0.45	-5.07e-06	-1.1e-05	-1.84e-05	-2.69e-05	-3.62e-05	-4.7e-05	-5.81e-05	-6.96e-05	-8.11e-05	-9.37e-05	-0.000106	-0.000118	-0.000131
	0.9	0.000210714	0.000218571	0.000227857	0.000237857	0.000240714	0.000252143	0.000260714	0.000272143	0.000284286	0.000292143	0.000305	0.000316429	0.00033		-0.44	-4.97e-06	-1.07e-05	-1.79e-05	-2.63e-05	-3.53e-05	-4.59e-05	-5.68e-05	-6.78e-05	-7.93e-05	-9.14e-05	-0.000103	-0.000115	-0.000128
	0.914	0.000214286	0.000222857	0.000231429	0.000242143	0.000245	0.000256429	0.000265	0.000276429	0.000288571	0.000296429	0.000309286	0.000322143	0.000335714		-0.43	-4.78e-06	-1.04e-05	-1.73e-05	-2.57e-05	-3.45e-05	-4.49e-05	-5.54e-05	-6.62e-05	-7.75e-05	-8.92e-05	-0.000101	-0.000112	-0.000125
	0.927	0.000218571	0.000226429	0.000235714	0.000246429	0.000249286	0.00026	0.000269286	0.000280714	0.000292857	0.000302143	0.000314286	0.000327143	0.000340714		-0.42	-4.67e-06	-1.01e-05	-1.69e-05	-2.51e-05	-3.36e-05	-4.39e-05	-5.41e-05	-6.46e-05	-7.56e-05	-8.7e-05	-9.82e-05	-0.000109	-0.000121
	0.941	0.000222857	0.000230714	0.00024	0.000250714	0.000253571	0.000265	0.000273571	0.000285714	0.000297857	0.000307143	0.000319286	0.000332143	0.000346429		-0.41	-4.55e-06	-9.96e-06	-1.65e-05	-2.45e-05	-3.28e-05	-4.27e-05	-5.27e-05	-6.31e-05	-7.36e-05	-8.48e-05	-9.57e-05	-0.000106	-0.000118
	0.955	0.000226429	0.000235	0.000243571	0.000255	0.000257857	0.000269286	0.000277857	0.00029	0.000302857	0.000311429	0.000323571	0.000337143	0.000351429		-0.4	-4.46e-06	-9.69e-06	-1.61e-05	-2.39e-05	-3.19e-05	-4.15e-05	-5.12e-05	-6.13e-05	-7.18e-05	-8.26e-05	-9.31e-05	-0.000104	-0.000115
	0.968	0.00023	0.000238571	0.000247143	0.00026	0.000262143	0.000273571	0.000282857	0.000295	0.000307143	0.000316429	0.000328571	0.000342143	0.000357143		-0.39	-4.25e-06	-9.38e-06	-1.56e-05	-2.32e-05	-3.11e-05	-4.03e-05	-4.99e-05	-5.98e-05	-6.99e-05	-8.04e-05	-9.06e-05	-0.000101	-0.000112
	0.982	0.000234286	0.000242857	0.000251429	0.000263571	0.000266429	0.000277857	0.000287857	0.000299286	0.000311429	0.000321429	0.000332857	0.000347857	0.000362143		-0.38	-4.09e-06	-9.13e-06	-1.52e-05	-2.25e-05	-3.01e-05	-3.93e-05	-4.86e-05	-5.82e-05	-6.8e-05	-7.82e-05	-8.83e-05	-9.82e-05	-0.000109
	0.996	0.000237857	0.000246429	0.000255714	0.000267143	0.000271429	0.000282143	0.000292143	0.000303571	0.000316429	0.000326429	0.000337857	0.000352857	0.000367143		-0.37	-3.92e-06	-8.72e-06	-1.48e-05	-2.19e-05	-2.94e-05	-3.83e-05	-4.72e-05	-5.67e-05	-6.62e-05	-7.6e-05	-8.58e-05	-9.56e-05	-0.000106
	1.01	0.000242143	0.00025	0.000259286	0.000270714	0.000275	0.000286429	0.000296429	0.000307857	0.000320714	0.000330714	0.000343571	0.000357857	0.000372143		-0.36	-3.82e-06	-8.47e-06	-1.43e-05	-2.12e-05	-2.87e-05	-3.73e-05	-4.59e-05	-5.5e-05	-6.43e-05	-7.38e-05	-8.33e-05	-9.28e-05	-0.000103
	1.02	0.000246429	0.000253571	0.000263571	0.000275	0.000279286	0.00029	0.000301429	0.000312857	0.000325	0.000335714	0.000347857	0.000362857	0.000377143		-0.35	-3.67e-06	-8.18e-06	-1.38e-05	-2.08e-05	-2.77e-05	-3.61e-05	-4.46e-05	-5.33e-05	-6.23e-05	-7.17e-05	-8.09e-05	-9.01e-05	-0.0001
	1.04	0.00025	0.000257857	0.000267143	0.000278571	0.000282857	0.000294286	0.000305	0.000317143	0.000329286	0.000340714	0.000352143	0.000367857	0.000382143		-0.34	-3.52e-06	-7.94e-06	-1.35e-05	-2e-05	-2.69e-05	-3.5e-05	-4.33e-05	-5.17e-05	-6.05e-05	-6.96e-05	-7.84e-05	-8.74e-05	-9.7e-05
	1.05	0.000255	0.000262143	0.000271429	0.000283571	0.000287143	0.000299286	0.00031	0.000321429	0.000334286	0.000344286	0.000357143	0.000372857	0.000387857		-0.33	-3.49e-06	-7.7e-06	-1.3e-05	-1.93e-05	-2.6e-05	-3.39e-05	-4.19e-05	-5.02e-05	-5.86e-05	-6.73e-05	-7.61e-05	-8.48e-05	-9.42e-05
	1.06	0.000258571	0.000265714	0.000275714	0.000287857	0.000291429	0.000303571	0.000314286	0.000326429	0.000338571	0.000349286	0.000362143	0.000377143	0.000392857		-0.32	-3.34e-06	-7.46e-06	-1.26e-05	-1.87e-05	-2.51e-05	-3.29e-05	-4.05e-05	-4.87e-05	-5.67e-05	-6.51e-05	-7.38e-05	-8.2e-05	-9.11e-05
	1.08	0.000262857	0.000269286	0.000279286	0.000291429	0.000295714	0.000307857	0.000318571	0.000331429	0.000343571	0.000354286	0.000367143	0.000382857	0.000397857		-0.31	-3.16e-06	-7.27e-06	-1.22e-05	-1.81e-05	-2.44e-05	-3.16e-05	-3.92e-05	-4.71e-05	-5.51e-05	-6.31e-05	-7.13e-05	-7.93e-05	-8.8e-05
	1.09	0.000267857	0.000273571	0.000282857	0.000295	0.0003	0.000312143	0.000323571	0.000335714	0.000347857	0.000358571	0.000372143	0.000387857	0.000404286		-0.3	-3.11e-06	-6.92e-06	-1.18e-05	-1.74e-05	-2.35e-05	-3.05e-05	-3.79e-05	-4.55e-05	-5.31e-05	-6.09e-05	-6.87e-05	-7.66e-05	-8.52e-05
	1.1	0.000270714	0.000277143	0.000286429	0.0003	0.000303571	0.000316429	0.000327857	0.000339286	0.000352143	0.000362143	0.000376429	0.000392143	0.000408571		-0.29	-3e-06	-6.65e-06	-1.13e-05	-1.68e-05	-2.27e-05	-2.95e-05	-3.66e-05	-4.4e-05	-5.14e-05	-5.88e-05	-6.63e-05	-7.42e-05	-8.21e-05
	1.12	0.000275	0.000281429	0.000290714	0.000303571	0.000307857	0.000320714	0.000332143	0.000343571	0.000356429	0.000366429	0.000381429	0.000397143	0.000413571		-0.28	-2.88e-06	-6.38e-06	-1.1e-05	-1.62e-05	-2.19e-05	-2.85e-05	-3.53e-05	-4.23e-05	-4.94e-05	-5.66e-05	-6.39e-05	-7.15e-05	-7.92e-05
	1.13	0.000277857	0.000284286	0.000295714	0.000307143	0.000312143	0.000325	0.000336429	0.000348571	0.000360714	0.000372143	0.000386429	0.000401429	0.00042		-0.27	-2.81e-06	-6.17e-06	-1.06e-05	-1.56e-05	-2.11e-05	-2.74e-05	-3.4e-05	-4.07e-05	-4.75e-05	-5.46e-05	-6.15e-05	-6.86e-05	-7.61e-05
	1.15	0.000281429	0.000288571	0.000299286	0.00031	0.000316429	0.000328571	0.000340714	0.000353571	0.000365714	0.000377143	0.000391429	0.000407143	0.000425		-0.26	-2.66e-06	-5.93e-06	-1.02e-05	-1.49e-05	-2.03e-05	-2.64e-05	-3.27e-05	-3.92e-05	-4.58e-05	-5.25e-05	-5.92e-05	-6.61e-05	-7.34e-05
	1.16	0.000285714	0.000293571	0.000302857	0.000314286	0.000320714	0.000332857	0.000344286	0.000357857	0.00037	0.000381429	0.000395714	0.000411429	0.000428571		-0.25	-2.62e-06	-5.67e-06	-9.78e-06	-1.43e-05	-1.95e-05	-2.54e-05	-3.15e-05	-3.76e-05	-4.4e-05	-5.05e-05	-5.68e-05	-6.34e-05	-7.05e-05
	1.17	0.000289286	0.000296429	0.000306429	0.000318571	0.000325	0.000337143	0.000348571	0.000362143	0.000374286	0.000385714	0.000400714	0.000415714	0.000434286		-0.24	-2.47e-06	-5.39e-06	-9.38e-06	-1.38e-05	-1.87e-05	-2.43e-05	-3.02e-05	-3.61e-05	-4.23e-05	-4.84e-05	-5.45e-05	-6.08e-05	-6.76e-05
	1.19	0.000292143	0.000300714	0.00031	0.000322143	0.000328571	0.000341429	0.000352857	0.000366429	0.000378571	0.000390714	0.000405	0.000420714	0.000439286		-0.23	-2.32e-06	-5.22e-06	-8.93e-06	-1.32e-05	-1.78e-05	-2.32e-05	-2.89e-05	-3.45e-05	-4.03e-05	-4.63e-05	-5.21e-05	-5.82e-05	-6.45e-05
	1.2	0.000295714	0.000305	0.000314286	0.000326429	0.000332857	0.000345714	0.000357143	0.00037	0.000382857	0.000394286	0.00041	0.000425714	0.000445		-0.22	-2.23e-06	-4.99e-06	-8.58e-06	-1.26e-05	-1.71e-05	-2.21e-05	-2.76e-05	-3.3e-05	-3.85e-05	-4.42e-05	-4.98e-05	-5.56e-05	-6.15e-05
	1.21	0.000300714	0.000307857	0.000317857	0.00033	0.000336429	0.000350714	0.000361429	0.000375	0.000387143	0.0004	0.000415	0.00043	0.00045		-0.21	-2.15e-06	-4.77e-06	-8.13e-06	-1.2e-05	-1.63e-05	-2.11e-05	-2.64e-05	-3.14e-05	-3.67e-05	-4.22e-05	-4.74e-05	-5.3e-05	-5.87e-05
	1.23	0.000304286	0.000311429	0.000322143	0.000333571	0.00034	0.000353571	0.000365714	0.000378571	0.000391429	0.000403571	0.000418571	0.000435	0.000455		-0.2	-2.05e-06	-4.5e-06	-7.75e-06	-1.14e-05	-1.56e-05	-2.02e-05	-2.51e-05	-3e-05	-3.49e-05	-4.02e-05	-4.52e-05	-5.04e-05	-5.59e-05
	1.24	0.000308571	0.000315	0.000326429	0.000337857	0.000344286	0.000357857	0.000369286	0.000383571	0.000396429	0.000409286	0.000422857	0.000439286	0.00046		-0.19	-1.93e-06	-4.22e-06	-7.38e-06	-1.08e-05	-1.48e-05	-1.91e-05	-2.37e-05	-2.85e-05	-3.32e-05	-3.81e-05	-4.29e-05	-4.78e-05	-5.3e-05
	1.25	0.000312143	0.000319286	0.000329286	0.000341429	0.000348571	0.000361429	0.000373571	0.000387857	0.0004	0.000414286	0.000427857	0.000445714	0.000465		-0.18	-1.77e-06	-3.93e-06	-6.93e-06	-1.02e-05	-1.4e-05	-1.8e-05	-2.25e-05	-2.7e-05	-3.14e-05	-3.6e-05	-4.06e-05	-4.52e-05	-5.01e-05
	1.27	0.000316429	0.000322857	0.000332143	0.000346429	0.000352857	0.000365	0.000377857	0.000392857	0.000404286	0.000418571	0.000432857	0.000451429	0.00047		-0.17	-1.69e-06	-3.7e-06	-6.53e-06	-9.51e-06	-1.33e-05	-1.71e-05	-2.13e-05	-2.54e-05	-2.96e-05	-3.39e-05	-3.83e-05	-4.26e-05	-4.73e-05
	1.28	0.00032	0.000327857	0.000335714	0.00035	0.000356429	0.000369286	0.000381429	0.000396429	0.000408571	0.000422857	0.000437143	0.000456429	0.000475		-0.16	-1.56e-06	-3.51e-06	-6.1e-06	-9.04e-06	-1.24e-05	-1.6e-05	-2e-05	-2.39e-05	-2.78e-05	-3.19e-05	-3.6e-05	-4.01e-05	-4.45e-05
	1.3	0.000322857	0.000331429	0.00034	0.000354286	0.000360714	0.000373571	0.000385714	0.000400714	0.000412857	0.000427857	0.000441429	0.000462143	0.000479286		-0.15	-1.45e-06	-3.27e-06	-5.69e-06	-8.43e-06	-1.16e-05	-1.5e-05	-1.87e-05	-2.23e-05	-2.61e-05	-2.99e-05	-3.37e-05	-3.75e-05	-4.18e-05
	1.31	0.000327143	0.000335	0.000343571	0.000358571	0.000365	0.000377143	0.00039	0.000405	0.000416429	0.000432857	0.000445714	0.000466429	0.000484286		-0.14	-1.37e-06	-3.02e-06	-5.3e-06	-7.86e-06	-1.08e-05	-1.4e-05	-1.75e-05	-2.09e-05	-2.43e-05	-2.79e-05	-3.15e-05	-3.5e-05	-3.89e-05
	1.32	0.000331429	0.000338571	0.000347143	0.000362857	0.000367143	0.000380714	0.000393571	0.000408571	0.000420714	0.000436429	0.000452143	0.000471429	0.000489286		-0.13	-1.27e-06	-2.79e-06	-4.89e-06	-7.29e-06	-1.01e-05	-1.3e-05	-1.62e-05	-1.94e-05	-2.25e-05	-2.6e-05	-2.92e-05	-3.25e-05	-3.61e-05
	1.34	0.000335	0.000341429	0.000351429	0.000367143	0.000371429	0.000385	0.000397143	0.000412143	0.000425	0.000440714	0.000457143	0.000475714	0.000495714		-0.12	-1.14e-06	-2.61e-06	-4.51e-06	-6.71e-06	-9.28e-06	-1.2e-05	-1.49e-05	-1.78e-05	-2.08e-05	-2.4e-05	-2.69e-05	-3e-05	-3.33e-05
	1.35	0.000338571	0.000345714	0.000355	0.000371429	0.000375714	0.000389286	0.000401429	0.000416429	0.00043	0.000445	0.000461429	0.000480714	0.000500714		-0.11	-1.04e-06	-2.37e-06	-4.14e-06	-6.14e-06	-8.47e-06	-1.1e-05	-1.37e-05	-1.64e-05	-1.91e-05	-2.19e-05	-2.46e-05	-2.75e-05	-3.05e-05
	1.36	0.000341429	0.00035	0.000358571	0.000375	0.00038	0.000392857	0.000405	0.00042	0.000433571	0.00045	0.000466429	0.000485	0.000505714		-0.1	-9.54e-07	-2.16e-06	-3.71e-06	-5.58e-06	-7.77e-06	-1e-05	-1.24e-05	-1.49e-05	-1.73e-05	-1.99e-05	-2.24e-05	-2.5e-05	-2.77e-05
	1.38	0.000345714	0.000354286	0.000361429	0.000378571	0.000384286	0.000397143	0.000409286	0.000424286	0.000437857	0.000453571	0.000471429	0.000488571	0.00051		-0.09	-8.38e-07	-1.94e-06	-3.37e-06	-5.04e-06	-6.98e-06	-9e-06	-1.12e-05	-1.34e-05	-1.56e-05	-1.79e-05	-2.01e-05	-2.24e-05	-2.49e-05
	1.39	0.000348571	0.000357143	0.000367143	0.000381429	0.000388571	0.000401429	0.000412857	0.000428571	0.000442143	0.000457857	0.000475714	0.000493571	0.000515		-0.08	-7.33e-07	-1.72e-06	-2.98e-06	-4.47e-06	-6.2e-06	-8.01e-06	-9.92e-06	-1.19e-05	-1.39e-05	-1.59e-05	-1.79e-05	-2e-05	-2.21e-05
	1.4	0.000352857	0.000361429	0.00037	0.000385714	0.000392857	0.000404286	0.000416429	0.000432857	0.000446429	0.000461429	0.000479286	0.000497857	0.000519286		-0.07	-6.33e-07	-1.51e-06	-2.63e-06	-3.9e-06	-5.38e-06	-6.97e-06	-8.65e-06	-1.04e-05	-1.21e-05	-1.39e-05	-1.56e-05	-1.74e-05	-1.94e-05
	1.42	0.000358571	0.000365714	0.000373571	0.000389286	0.000396429	0.000407857	0.00042	0.000436429	0.000450714	0.000466429	0.000483571	0.000502857	0.000524286		-0.06	-5.47e-07	-1.31e-06	-2.23e-06	-3.36e-06	-4.61e-06	-5.97e-06	-7.45e-06	-8.9e-06	-1.04e-05	-1.19e-05	-1.34e-05	-1.49e-05	-1.66e-05
	1.43	0.000361429	0.00037	0.000377143	0.000392857	0.0004	0.000411429	0.000424286	0.000440714	0.000454286	0.00047	0.000487857	0.000507143	0.00053		-0.05	-4.59e-07	-1.08e-06	-1.87e-06	-2.81e-06	-3.84e-06	-4.97e-06	-6.2e-06	-7.42e-06	-8.65e-06	-9.9e-06	-1.12e-05	-1.24e-05	-1.38e-05
	1.45	0.000365	0.000372857	0.000380714	0.000396429	0.000402857	0.000416429	0.000428571	0.000445	0.000458571	0.000475	0.000492143	0.000512143	0.000534286		-0.04	-3.65e-07	-8.65e-07	-1.48e-06	-2.24e-06	-3.07e-06	-3.98e-06	-4.96e-06	-5.93e-06	-6.92e-06	-7.91e-06	-8.93e-06	-9.93e-06	-1.11e-05
	1.46	0.000369286	0.000377857	0.000384286	0.0004	0.000407143	0.00042	0.000432143	0.000449286	0.000462143	0.000479286	0.000496429	0.000516429	0.000539286		-0.03	-2.76e-07	-6.49e-07	-1.11e-06	-1.69e-06	-2.31e-06	-2.97e-06	-3.72e-06	-4.45e-06	-5.19e-06	-5.95e-06	-6.69e-06	-7.47e-06	-8.28e-06
	1.47	0.000372857	0.000381429	0.000387857	0.000402143	0.000410714	0.000423571	0.000437143	0.000452857	0.000466429	0.000483571	0.000500714	0.00052	0.000544286		-0.02	-1.86e-07	-4.3e-07	-7.37e-07	-1.12e-06	-1.55e-06	-1.99e-06	-2.48e-06	-2.96e-06	-3.46e-06	-3.97e-06	-4.46e-06	-4.98e-06	-5.52e-06
	1.49	0.000375714	0.000384286	0.000391429	0.000405714	0.000415	0.000427143	0.000440714	0.000457143	0.00047	0.000487857	0.000505	0.000524286	0.000548571		-0.01	-9.48e-08	-2.15e-07	-3.71e-07	-5.59e-07	-7.69e-07	-9.95e-07	-1.24e-06	-1.49e-06	-1.73e-06	-1.98e-06	-2.23e-06	-2.49e-06	-2.77e-06
	1.5	0.00038	0.000387857	0.000395	0.000409286	0.000419286	0.000430714	0.000444286	0.00046	0.000474286	0.000490714	0.000509286	0.000528571	0.000552857		0	-2.65e-11	-1.66e-10	-5.37e-10	-6.51e-10	-8.09e-10	-7.75e-10	-7.93e-10	-8.37e-10	-8.04e-10	-8.03e-10	-6.77e-10	-8.77e-10	-9.96e-10
	1.51	0.000385	0.000392143	0.000398571	0.000412857	0.000423571	0.000435	0.000448571	0.000464286	0.000478571	0.000495	0.000513571	0.000532857	0.000557857		0.01	9.17e-08	2.14e-07	3.71e-07	5.59e-07	7.67e-07	9.95e-07	1.24e-06	1.48e-06	1.73e-06	1.98e-06	2.23e-06	2.48e-06	2.75e-06
	1.53	0.000388571	0.000394286	0.000401429	0.000416429	0.000426429	0.000437857	0.000452857	0.000468571	0.000483571	0.000499286	0.000517143	0.000537143	0.000562857		0.02	1.82e-07	4.23e-07	7.4e-07	1.12e-06	1.54e-06	1.98e-06	2.47e-06	2.96e-06	3.46e-06	3.96e-06	4.45e-06	4.97e-06	5.52e-06
	1.54	0.000391429	0.000398571	0.000405714	0.00042	0.00043	0.000441429	0.000457143	0.000472857	0.000487143	0.000504286	0.000521429	0.000541429	0.000567857		0.03	2.79e-07	6.34e-07	1.12e-06	1.67e-06	2.31e-06	2.97e-06	3.7e-06	4.44e-06	5.19e-06	5.95e-06	6.68e-06	7.45e-06	8.29e-06
	1.55	0.000395	0.000402143	0.000409286	0.000425	0.000433571	0.000446429	0.00046	0.000477143	0.000490714	0.000508571	0.000525714	0.000545714	0.000571429		0.04	3.67e-07	8.5e-07	1.49e-06	2.23e-06	3.06e-06	3.98e-06	4.94e-06	5.95e-06	6.9e-06	7.92e-06	8.91e-06	9.94e-06	1.11e-05
	1.57	0.000398571	0.000405714	0.000414286	0.000429286	0.000437143	0.000450714	0.000464286	0.000481429	0.000495	0.000512143	0.000530714	0.000549286	0.000577143		0.05	4.56e-07	1.06e-06	1.86e-06	2.78e-06	3.83e-06	4.96e-06	6.17e-06	7.41e-06	8.62e-06	9.9e-06	1.11e-05	1.24e-05	1.38e-05
	1.58	0.000402143	0.00041	0.000417143	0.000432143	0.000440714	0.000453571	0.000467143	0.000485714	0.000499286	0.000517143	0.000535	0.000554286	0.000581429		0.06	5.43e-07	1.27e-06	2.24e-06	3.34e-06	4.59e-06	5.97e-06	7.41e-06	8.89e-06	1.04e-05	1.18e-05	1.34e-05	1.49e-05	1.66e-05
	1.6	0.000405714	0.000413571	0.000421429	0.000435714	0.000443571	0.000457857	0.000471429	0.000488571	0.000502857	0.000520714	0.000539286	0.000559286	0.000585714		0.07	6.33e-07	1.49e-06	2.6e-06	3.89e-06	5.35e-06	6.94e-06	8.68e-06	1.04e-05	1.21e-05	1.39e-05	1.56e-05	1.74e-05	1.94e-05
	1.61	0.000409286	0.000415714	0.000424286	0.000438571	0.000447143	0.000461429	0.000475	0.000492857	0.000506429	0.000524286	0.000543571	0.000563571	0.00059		0.08	7.42e-07	1.69e-06	2.99e-06	4.43e-06	6.13e-06	7.94e-06	9.91e-06	1.19e-05	1.38e-05	1.58e-05	1.79e-05	1.99e-05	2.21e-05
	1.62	0.000412857	0.00042	0.000427143	0.000441429	0.000451429	0.000465714	0.000479286	0.000495	0.00051	0.000528571	0.000547143	0.000567857	0.000594286		0.09	8.5e-07	1.91e-06	3.36e-06	4.97e-06	6.91e-06	8.94e-06	1.12e-05	1.34e-05	1.55e-05	1.78e-05	2.01e-05	2.24e-05	2.49e-05
	1.64	0.000417143	0.000423571	0.00043	0.000444286	0.000455	0.000468571	0.000482143	0.000497857	0.000513571	0.000531429	0.000551429	0.000572143	0.000598571		0.1	9.48e-07	2.12e-06	3.71e-06	5.52e-06	7.7e-06	9.98e-06	1.24e-05	1.49e-05	1.73e-05	1.98e-05	2.23e-05	2.48e-05	2.77e-05
	1.65	0.000420714	0.000427143	0.000432857	0.000447857	0.000458571	0.000471429	0.000485714	0.000502143	0.000517857	0.000535714	0.000555	0.000575714	0.000602857		0.11	1.02e-06	2.37e-06	4.09e-06	6.12e-06	8.47e-06	1.09e-05	1.36e-05	1.64e-05	1.9e-05	2.18e-05	2.45e-05	2.74e-05	3.05e-05
	1.66	0.000422143	0.00043	0.000437143	0.000451429	0.000462143	0.000475	0.000488571	0.000506429	0.000521429	0.000538571	0.000559286	0.00058	0.000606429		0.12	1.1e-06	2.59e-06	4.42e-06	6.67e-06	9.29e-06	1.19e-05	1.49e-05	1.79e-05	2.07e-05	2.38e-05	2.68e-05	2.99e-05	3.33e-05
	1.68	0.000426429	0.000432857	0.000440714	0.000454286	0.000465	0.000479286	0.000492857	0.000509286	0.000524286	0.000542143	0.000562143	0.000583571	0.000611429		0.13	1.22e-06	2.81e-06	4.83e-06	7.21e-06	1e-05	1.29e-05	1.61e-05	1.93e-05	2.25e-05	2.58e-05	2.9e-05	3.24e-05	3.61e-05
	1.69	0.000430714	0.000435714	0.000443571	0.000457143	0.000467143	0.000482857	0.000496429	0.000513571	0.000528571	0.000545	0.000566429	0.000587143	0.000615714		0.14	1.34e-06	3.03e-06	5.22e-06	7.83e-06	1.08e-05	1.39e-05	1.74e-05	2.08e-05	2.42e-05	2.78e-05	3.13e-05	3.49e-05	3.89e-05
	1.7	0.000432143	0.000439286	0.000447857	0.000460714	0.000470714	0.000485714	0.000500714	0.000516429	0.000532857	0.000549286	0.000570714	0.000591429	0.000620714		0.15	1.42e-06	3.27e-06	5.6e-06	8.35e-06	1.15e-05	1.49e-05	1.86e-05	2.23e-05	2.6e-05	2.98e-05	3.36e-05	3.75e-05	4.18e-05
	1.72	0.000435	0.000442857	0.000449286	0.000465	0.000473571	0.000488571	0.000503571	0.00052	0.000536429	0.000552857	0.000575	0.000596429	0.000624286		0.16	1.53e-06	3.48e-06	5.96e-06	8.88e-06	1.23e-05	1.59e-05	1.99e-05	2.37e-05	2.77e-05	3.17e-05	3.59e-05	4e-05	4.46e-05
	1.73	0.000436429	0.000445714	0.000452857	0.000468571	0.000476429	0.000491429	0.000507143	0.000522143	0.00054	0.000557143	0.00058	0.0006	0.000628571		0.17	1.69e-06	3.69e-06	6.38e-06	9.4e-06	1.31e-05	1.69e-05	2.12e-05	2.52e-05	2.94e-05	3.37e-05	3.81e-05	4.26e-05	4.74e-05
	1.75	0.000438571	0.000448571	0.000455714	0.000471429	0.000480714	0.000495714	0.000510714	0.000525714	0.000544286	0.000561429	0.000582857	0.000605	0.000632857		0.18	1.8e-06	3.91e-06	6.69e-06	9.99e-06	1.38e-05	1.79e-05	2.24e-05	2.67e-05	3.11e-05	3.58e-05	4.04e-05	4.51e-05	5.02e-05
	1.76	0.000442143	0.000450714	0.000459286	0.000474286	0.000483571	0.000498571	0.000513571	0.000528571	0.000546429	0.000565714	0.000586429	0.000607857	0.000635714		0.19	1.87e-06	4.09e-06	7.06e-06	1.06e-05	1.46e-05	1.88e-05	2.36e-05	2.82e-05	3.3e-05	3.79e-05	4.27e-05	4.77e-05	5.31e-05
	1.77	0.000443571	0.000453571	0.000461429	0.000476429	0.000486429	0.0005	0.000516429	0.000531429	0.00055	0.000569286	0.00059	0.000611429	0.000639286		0.2	2.02e-06	4.29e-06	7.46e-06	1.11e-05	1.54e-05	1.99e-05	2.48e-05	2.97e-05	3.46e-05	3.98e-05	4.5e-05	5.02e-05	5.6e-05
	1.79	0.000445714	0.000456429	0.000464286	0.000478571	0.000489286	0.000503571	0.00052	0.000535	0.000552857	0.000572857	0.000593571	0.000614286	0.000643571		0.21	2.09e-06	4.51e-06	7.86e-06	1.16e-05	1.61e-05	2.1e-05	2.61e-05	3.12e-05	3.65e-05	4.19e-05	4.73e-05	5.28e-05	5.88e-05
	1.8	0.000447143	0.000460714	0.000467143	0.000480714	0.000492143	0.000507143	0.000522857	0.000537143	0.000555714	0.000575714	0.000596429	0.000617143	0.000646429		0.22	2.21e-06	4.78e-06	8.25e-06	1.23e-05	1.69e-05	2.2e-05	2.74e-05	3.27e-05	3.83e-05	4.39e-05	4.96e-05	5.54e-05	6.17e-05
	1.81	0.000449286	0.000462143	0.00047	0.000482857	0.000495	0.000509286	0.000526429	0.000541429	0.000557857	0.000578571	0.0006	0.000620714	0.000649286		0.23	2.3e-06	5.06e-06	8.67e-06	1.28e-05	1.77e-05	2.3e-05	2.87e-05	3.43e-05	4e-05	4.6e-05	5.2e-05	5.8e-05	6.46e-05
	1.83	0.000451429	0.000464286	0.000472857	0.000486429	0.000497143	0.000512143	0.000527857	0.000543571	0.000560714	0.000581429	0.000602857	0.000624286	0.000652143		0.24	2.37e-06	5.27e-06	9.06e-06	1.33e-05	1.85e-05	2.4e-05	2.99e-05	3.58e-05	4.18e-05	4.81e-05	5.42e-05	6.05e-05	6.74e-05
	1.84	0.000452857	0.000467143	0.000474286	0.000488571	0.000498571	0.000515	0.000531429	0.000546429	0.000563571	0.000584286	0.000607143	0.000627857	0.000656429		0.25	2.47e-06	5.48e-06	9.48e-06	1.4e-05	1.92e-05	2.5e-05	3.12e-05	3.73e-05	4.36e-05	5.01e-05	5.65e-05	6.31e-05	7.04e-05
	1.85	0.000455714	0.000467857	0.000477143	0.000490714	0.000500714	0.000516429	0.000533571	0.000548571	0.000566429	0.000587143	0.000609286	0.000631429	0.000659286		0.26	2.56e-06	5.68e-06	9.84e-06	1.46e-05	2e-05	2.62e-05	3.24e-05	3.88e-05	4.54e-05	5.21e-05	5.9e-05	6.57e-05	7.31e-05
	1.87	0.000456429	0.00047	0.000478571	0.000493571	0.000503571	0.000518571	0.000535	0.000551429	0.000568571	0.000589286	0.000611429	0.000633571	0.000662143		0.27	2.74e-06	5.94e-06	1.02e-05	1.51e-05	2.08e-05	2.71e-05	3.36e-05	4.03e-05	4.72e-05	5.41e-05	6.14e-05	6.83e-05	7.61e-05
	1.88	0.000457143	0.000471429	0.000480714	0.000495714	0.000505714	0.00052	0.000537143	0.000553571	0.000571429	0.000592143	0.000615	0.000636429	0.000665		0.28	2.8e-06	6.17e-06	1.06e-05	1.57e-05	2.16e-05	2.82e-05	3.5e-05	4.18e-05	4.9e-05	5.61e-05	6.36e-05	7.1e-05	7.91e-05
	1.9	0.000459286	0.000473571	0.000482857	0.000496429	0.000507857	0.000522857	0.000538571	0.000555714	0.000574286	0.000594286	0.000616429	0.000639286	0.000667143		0.29	2.92e-06	6.45e-06	1.1e-05	1.62e-05	2.25e-05	2.92e-05	3.63e-05	4.34e-05	5.07e-05	5.83e-05	6.6e-05	7.36e-05	8.21e-05
	1.91	0.000461429	0.000475	0.000485	0.000499286	0.000509286	0.000525714	0.000540714	0.000557857	0.000576429	0.000596429	0.000619286	0.000642857	0.00067		0.3	3.01e-06	6.65e-06	1.14e-05	1.69e-05	2.33e-05	3.02e-05	3.75e-05	4.49e-05	5.24e-05	6.03e-05	6.81e-05	7.62e-05	8.51e-05
	1.92	0.000462857	0.000476429	0.000487143	0.000500714	0.000510714	0.000527143	0.000542143	0.00056	0.000578571	0.000598571	0.000621429	0.000644286	0.000672857		0.31	3.14e-06	6.9e-06	1.18e-05	1.75e-05	2.4e-05	3.12e-05	3.88e-05	4.65e-05	5.43e-05	6.23e-05	7.06e-05	7.88e-05	8.82e-05
	1.94	0.000465	0.000477143	0.000488571	0.000502143	0.000512857	0.000528571	0.000544286	0.000562143	0.00058	0.000600714	0.000623571	0.000647143	0.000675714		0.32	3.26e-06	7.05e-06	1.21e-05	1.8e-05	2.48e-05	3.22e-05	4e-05	4.79e-05	5.6e-05	6.45e-05	7.3e-05	8.16e-05	9.11e-05
	1.95	0.000465714	0.000479286	0.000489286	0.000503571	0.000515	0.000531429	0.000545714	0.000563571	0.000582857	0.000604286	0.000625714	0.00065	0.000678571		0.33	3.44e-06	7.39e-06	1.25e-05	1.87e-05	2.56e-05	3.32e-05	4.13e-05	4.95e-05	5.79e-05	6.65e-05	7.54e-05	8.41e-05	9.4e-05
	1.96	0.000467143	0.000480714	0.000491429	0.000505	0.000515714	0.000532857	0.000548571	0.000566429	0.000585	0.000606429	0.000628571	0.000652857	0.000680714		0.34	3.51e-06	7.6e-06	1.3e-05	1.93e-05	2.64e-05	3.42e-05	4.26e-05	5.09e-05	5.96e-05	6.85e-05	7.77e-05	8.69e-05	9.69e-05
	1.98	0.000467143	0.000482857	0.000492857	0.000506429	0.000517857	0.000532857	0.00055	0.000568571	0.000587143	0.000607857	0.000630714	0.000654286	0.000682857		0.35	3.7e-06	7.88e-06	1.34e-05	2e-05	2.71e-05	3.53e-05	4.39e-05	5.26e-05	6.14e-05	7.08e-05	8e-05	8.95e-05	9.99e-05
	1.99	0.000469286	0.000483571	0.000494286	0.000507857	0.000518571	0.000534286	0.000552143	0.00057	0.000588571	0.000609286	0.000632857	0.000657857	0.000685		0.36	3.84e-06	8.12e-06	1.37e-05	2.06e-05	2.8e-05	3.63e-05	4.51e-05	5.41e-05	6.32e-05	7.28e-05	8.25e-05	9.23e-05	0.000103
	2	0.00047	0.000484286	0.000494286	0.000508571	0.000520714	0.000536429	0.000552857	0.000572143	0.000590714	0.000610714	0.000635	0.000659286	0.000687143		0.37	3.94e-06	8.43e-06	1.4e-05	2.12e-05	2.87e-05	3.73e-05	4.65e-05	5.56e-05	6.51e-05	7.49e-05	8.5e-05	9.49e-05	0.000106
	2.02	0.00047	0.000485714	0.000495714	0.00051	0.000520714	0.000537143	0.000555	0.000572857	0.000592143	0.000613571	0.000637143	0.000660714	0.00069		0.38	4.05e-06	8.61e-06	1.44e-05	2.17e-05	2.95e-05	3.83e-05	4.78e-05	5.72e-05	6.69e-05	7.69e-05	8.72e-05	9.75e-05	0.000109
	2.03	0.00047	0.000485714	0.000497143	0.000512143	0.000522857	0.000538571	0.000556429	0.000575714	0.000592857	0.000615714	0.000639286	0.000662857	0.000691429		0.39	4.14e-06	9e-06	1.49e-05	2.22e-05	3.03e-05	3.93e-05	4.9e-05	5.87e-05	6.89e-05	7.91e-05	8.96e-05	0.0001	0.000112
	2.05	0.000469286	0.000486429	0.000497857	0.000512143	0.000523571	0.000539286	0.000557857	0.000577143	0.000595	0.000617143	0.000641429	0.000664286	0.000694286		0.4	4.29e-06	9.16e-06	1.54e-05	2.31e-05	3.11e-05	4.05e-05	5.05e-05	6.03e-05	7.07e-05	8.12e-05	9.21e-05	0.000103	0.000115
	2.06	0.000469286	0.000486429	0.000499286	0.000512857	0.000524286	0.000541429	0.000558571	0.000578571	0.000597143	0.000619286	0.000643571	0.000667143	0.000695714		0.41	4.46e-06	9.44e-06	1.57e-05	2.35e-05	3.18e-05	4.15e-05	5.18e-05	6.19e-05	7.25e-05	8.33e-05	9.45e-05	0.000106	0.000118
	2.07	0.000469286	0.000486429	0.000499286	0.000513571	0.000524286	0.000542143	0.00056	0.000578571	0.000598571	0.000622143	0.000645714	0.000668571	0.000697857		0.42	4.67e-06	9.69e-06	1.62e-05	2.42e-05	3.28e-05	4.26e-05	5.32e-05	6.35e-05	7.44e-05	8.54e-05	9.69e-05	0.000108	0.000121
	2.09	0.00047	0.000487857	0.000501429	0.000514286	0.000525714	0.000542857	0.000561429	0.00058	0.0006	0.000623571	0.000647143	0.000671429	0.0007		0.43	4.78e-06	9.97e-06	1.67e-05	2.48e-05	3.36e-05	4.36e-05	5.45e-05	6.5e-05	7.63e-05	8.76e-05	9.94e-05	0.000111	0.000124
	2.1	0.000469286	0.000487857	0.000501429	0.000514286	0.000527143	0.000543571	0.000562857	0.000581429	0.000602143	0.000625	0.000648571	0.000673571	0.000701429		0.44	4.88e-06	1.03e-05	1.71e-05	2.53e-05	3.44e-05	4.47e-05	5.58e-05	6.67e-05	7.81e-05	8.97e-05	0.000102	0.000114	0.000127
	2.11	0.000470714	0.000488571	0.000500714	0.000515	0.000527857	0.000545	0.000564286	0.000583571	0.000603571	0.000625714	0.000651429	0.000675	0.000705		0.45	4.94e-06	1.05e-05	1.74e-05	2.58e-05	3.51e-05	4.57e-05	5.71e-05	6.84e-05	8e-05	9.17e-05	0.000104	0.000117	0.000131
	2.13	0.00047	0.000488571	0.000500714	0.000515	0.000527143	0.000545714	0.000565	0.000584286	0.000605	0.000628571	0.000652857	0.000677143	0.000706429		0.46	5.06e-06	1.08e-05	1.78e-05	2.65e-05	3.59e-05	4.67e-05	5.85e-05	6.99e-05	8.19e-05	9.42e-05	0.000107	0.00012	0.000134
	2.14	0.000469286	0.000489286	0.000501429	0.000515714	0.000529286	0.000545714	0.000565	0.000585	0.000606429	0.00063	0.000654286	0.000678571	0.000708571		0.47	5.2e-06	1.11e-05	1.84e-05	2.7e-05	3.67e-05	4.79e-05	5.99e-05	7.14e-05	8.37e-05	9.64e-05	0.000109	0.000123	0.000136
	2.15	0.00047	0.000488571	0.000500714	0.000516429	0.000529286	0.000546429	0.000565714	0.000587143	0.000607143	0.000631429	0.000655714	0.00068	0.000710714		0.48	5.34e-06	1.13e-05	1.88e-05	2.77e-05	3.76e-05	4.91e-05	6.12e-05	7.33e-05	8.56e-05	9.85e-05	0.000112	0.000125	0.00014
	2.17	0.00047	0.000487857	0.000501429	0.000516429	0.000529286	0.000547143	0.000567143	0.000587857	0.000609286	0.000632857	0.000657143	0.000681429	0.000712857		0.49	5.47e-06	1.15e-05	1.92e-05	2.84e-05	3.84e-05	5.01e-05	6.23e-05	7.48e-05	8.74e-05	0.000101	0.000114	0.000128	0.000143
	2.18	0.00047	0.000488571	0.000501429	0.000515714	0.00053	0.000547857	0.000567857	0.000589286	0.000609286	0.000634286	0.000658571	0.000682857	0.000714286		0.5	5.67e-06	1.18e-05	1.96e-05	2.9e-05	3.93e-05	5.11e-05	6.37e-05	7.62e-05	8.93e-05	0.000103	0.000117	0.000131	0.000146
	2.2	0.000471429	0.000488571	0.000501429	0.000517143	0.000530714	0.000548571	0.000568571	0.00059	0.000610714	0.000636429	0.000659286	0.000684286	0.000714286		0.51	5.75e-06	1.22e-05	2.01e-05	2.97e-05	4.01e-05	5.21e-05	6.51e-05	7.79e-05	9.11e-05	0.000105	0.000119	0.000134	0.000149
	2.21	0.00047	0.000487143	0.000502143	0.000517857	0.000531429	0.000548571	0.000568571	0.000590714	0.000611429	0.000637143	0.000660714	0.000686429	0.000714286		0.52	5.84e-06	1.24e-05	2.04e-05	3.02e-05	4.08e-05	5.3e-05	6.63e-05	7.95e-05	9.3e-05	0.000107	0.000122	0.000137	0.000153
	2.22	0.000468571	0.000488571	0.000503571	0.000518571	0.000531429	0.000549286	0.00057	0.000591429	0.000612857	0.000637857	0.000662143	0.000687857	0.000721429		0.53	6.1e-06	1.26e-05	2.08e-05	3.08e-05	4.15e-05	5.42e-05	6.76e-05	8.1e-05	9.5e-05	0.00011	0.000125	0.00014	0.000156
	2.24	0.000469286	0.000488571	0.000502857	0.000518571	0.000531429	0.000550714	0.00057	0.000592857	0.000614286	0.000639286	0.000664286	0.00069	0.000721429		0.54	6.21e-06	1.3e-05	2.11e-05	3.16e-05	4.27e-05	5.55e-05	6.88e-05	8.27e-05	9.67e-05	0.000112	0.000127	0.000143	0.000159
	2.25	0.000467857	0.000487857	0.000502857	0.000517857	0.000532857	0.000550714	0.000570714	0.000593571	0.000615714	0.000640714	0.000665714	0.000691429	0.000721429		0.55	6.46e-06	1.32e-05	2.15e-05	3.21e-05	4.36e-05	5.65e-05	7.03e-05	8.41e-05	9.89e-05	0.000114	0.000129	0.000145	0.000162
	2.26	0.000467143	0.000487143	0.000502857	0.000518571	0.000532857	0.000551429	0.000571429	0.000595	0.000616429	0.000640714	0.000666429	0.000692143	0.000721429		0.56	6.55e-06	1.35e-05	2.21e-05	3.27e-05	4.43e-05	5.77e-05	7.17e-05	8.6e-05	0.000101	0.000116	0.000132	0.000148	0.000165
	2.28	0.000467857	0.000486429	0.000502143	0.000517857	0.000533571	0.000552143	0.000572143	0.000595	0.000617857	0.000642857	0.000667857	0.000694286	0.000721429		0.57	6.65e-06	1.36e-05	2.26e-05	3.33e-05	4.51e-05	5.88e-05	7.3e-05	8.76e-05	0.000103	0.000118	0.000135	0.000151	0.000169
	2.29	0.000467857	0.000485714	0.000502143	0.000518571	0.000533571	0.000552143	0.000572857	0.000596429	0.000617857	0.000642857	0.000669286	0.000695	0.000728571		0.58	6.79e-06	1.41e-05	2.29e-05	3.39e-05	4.61e-05	5.97e-05	7.41e-05	8.92e-05	0.000104	0.000121	0.000137	0.000154	0.000172
	2.3	0.000467857	0.000485714	0.000502143	0.000518571	0.000533571	0.000552857	0.000572857	0.000597143	0.000619286	0.000644286	0.000670714	0.000695714	0.000728571		0.59	7.02e-06	1.45e-05	2.34e-05	3.46e-05	4.68e-05	6.07e-05	7.56e-05	9.09e-05	0.000106	0.000123	0.00014	0.000157	0.000175
	2.32	0.000467143	0.000485714	0.000502857	0.000518571	0.000534286	0.000552143	0.000572857	0.000597143	0.00062	0.000645	0.000671429	0.000697857	0.000728571		0.6	7.06e-06	1.47e-05	2.38e-05	3.53e-05	4.77e-05	6.19e-05	7.68e-05	9.26e-05	0.000108	0.000125	0.000142	0.00016	0.000178
	2.33	0.000467857	0.000486429	0.000502143	0.000518571	0.000533571	0.000552857	0.000573571	0.000597143	0.000621429	0.000646429	0.000672143	0.000698571	0.000728571		0.61	7.28e-06	1.5e-05	2.43e-05	3.56e-05	4.83e-05	6.3e-05	7.84e-05	9.42e-05	0.000111	0.000127	0.000145	0.000163	0.000182
	2.35	0.000466429	0.000487143	0.000501429	0.000518571	0.000533571	0.000552857	0.000573571	0.000597857	0.000622143	0.000647143	0.000672857	0.0007	0.000735714		0.62	7.35e-06	1.53e-05	2.48e-05	3.63e-05	4.93e-05	6.42e-05	7.95e-05	9.58e-05	0.000113	0.00013	0.000147	0.000166	0.000185
	2.36	0.000465714	0.000486429	0.000501429	0.000517143	0.000533571	0.000552143	0.000575	0.000597143	0.000621429	0.000647857	0.000673571	0.000701429	0.000735714		0.63	7.66e-06	1.58e-05	2.53e-05	3.69e-05	5.03e-05	6.53e-05	8.1e-05	9.75e-05	0.000114	0.000132	0.00015	0.000168	0.000188
	2.37	0.000466429	0.000485714	0.000502143	0.000517143	0.000533571	0.000552143	0.000575714	0.000598571	0.000622857	0.000648571	0.000674286	0.000702857	0.000735714		0.64	7.86e-06	1.58e-05	2.57e-05	3.76e-05	5.12e-05	6.65e-05	8.23e-05	9.89e-05	0.000116	0.000134	0.000153	0.000171	0.000191
	2.39	0.000466429	0.000486429	0.000500714	0.000515714	0.000533571	0.000553571	0.000575714	0.0006	0.000623571	0.000649286	0.000675	0.000702857	0.000735714		0.65	7.97e-06	1.6e-05	2.63e-05	3.83e-05	5.2e-05	6.76e-05	8.37e-05	0.000101	0.000118	0.000136	0.000155	0.000174	0.000195
	2.4	0.000466429	0.000485714	0.000500714	0.000516429	0.000535	0.000552857	0.000575714	0.0006	0.000624286	0.00065	0.000676429	0.000704286	0.000735714		0.66	8.25e-06	1.62e-05	2.68e-05	3.91e-05	5.27e-05	6.87e-05	8.52e-05	0.000102	0.00012	0.000139	0.000158	0.000177	0.000198
	2.41	0.000466429	0.000486429	0.000500714	0.000515714	0.000535	0.000552143	0.000575714	0.0006	0.000624286	0.000650714	0.000677143	0.000705714	0.000735714		0.67	8.42e-06	1.67e-05	2.73e-05	3.98e-05	5.35e-05	7e-05	8.65e-05	0.000104	0.000122	0.000141	0.00016	0.00018	0.000201
	2.43	0.000466429	0.000486429	0.000501429	0.000515714	0.000535	0.000552143	0.000576429	0.000599286	0.000624286	0.000652143	0.000677143	0.000706429	0.000742857		0.68	8.51e-06	1.68e-05	2.8e-05	4.07e-05	5.48e-05	7.09e-05	8.81e-05	0.000106	0.000124	0.000143	0.000163	0.000183	0.000205
	2.44	0.000466429	0.000484286	0.000500714	0.000516429	0.000534286	0.000552857	0.000575714	0.000600714	0.000625	0.000652143	0.000677857	0.000707143	0.000742857		0.69	8.69e-06	1.71e-05	2.84e-05	4.1e-05	5.57e-05	7.2e-05	8.95e-05	0.000107	0.000126	0.000145	0.000166	0.000186	0.000208
	2.45	0.000465714	0.000485	0.000500714	0.000516429	0.000535	0.000552857	0.000576429	0.000600714	0.000625	0.000652143	0.000678571	0.000707857	0.000742857		0.7	8.87e-06	1.74e-05	2.89e-05	4.16e-05	5.64e-05	7.29e-05	9.1e-05	0.000109	0.000128	0.000148	0.000168	0.000189	0.000211
	2.47	0.000465	0.000484286	0.000500714	0.000515	0.000534286	0.000552857	0.000575714	0.000601429	0.000626429	0.000653571	0.000679286	0.000708571	0.000742857		0.71	9.17e-06	1.8e-05	2.93e-05	4.25e-05	5.72e-05	7.43e-05	9.23e-05	0.000111	0.00013	0.00015	0.000171	0.000192	0.000214
	2.48	0.000465714	0.000484286	0.000500714	0.000515	0.000534286	0.000554286	0.000576429	0.000602143	0.000626429	0.000653571	0.00068	0.00071	0.000742857		0.72	9.28e-06	1.81e-05	2.98e-05	4.28e-05	5.81e-05	7.52e-05	9.35e-05	0.000112	0.000132	0.000152	0.000173	0.000195	0.000217
	2.5	0.000465714	0.000484286	0.000500714	0.000515	0.000534286	0.000554286	0.000576429	0.000602143	0.000626429	0.000653571	0.000681429	0.000711429	0.000742857		0.73	9.51e-06	1.84e-05	3e-05	4.38e-05	5.89e-05	7.61e-05	9.49e-05	0.000114	0.000134	0.000155	0.000176	0.000198	0.000221
	2.51	0.000465	0.000482857	0.0005	0.000515	0.000533571	0.000554286	0.000577143	0.000602857	0.000627143	0.000654286	0.000682143	0.000712143	0.000742857		0.74	9.73e-06	1.86e-05	3.06e-05	4.43e-05	5.96e-05	7.72e-05	9.63e-05	0.000116	0.000136	0.000157	0.000178	0.000201	0.000224
	2.52	0.000465	0.000484286	0.000498571	0.000515714	0.000534286	0.000553571	0.000576429	0.000601429	0.000627143	0.000655	0.000682857	0.000712857	0.000742857		0.75	9.83e-06	1.88e-05	3.09e-05	4.49e-05	6.06e-05	7.82e-05	9.77e-05	0.000118	0.000138	0.00016	0.000182	0.000204	0.000228
	2.54	0.000465	0.000482857	0.000497857	0.000515	0.000533571	0.000554286	0.000576429	0.000602857	0.000627143	0.000655	0.000683571	0.000714286	0.00075		0.76	9.97e-06	1.92e-05	3.15e-05	4.58e-05	6.13e-05	7.94e-05	9.91e-05	0.000119	0.00014	0.000162	0.000184	0.000206	0.000231
	2.55	0.000462857	0.000482857	0.000499286	0.000515714	0.000534286	0.000553571	0.000576429	0.000602857	0.000627857	0.000655714	0.000685	0.000714286	0.00075		0.77	1.02e-05	1.96e-05	3.21e-05	4.64e-05	6.24e-05	8.07e-05	0.000101	0.000121	0.000142	0.000164	0.000186	0.00021	0.000234
	2.56	0.000462857	0.000482857	0.000498571	0.000515	0.000534286	0.000554286	0.000576429	0.000602857	0.000629286	0.000656429	0.000685714	0.000714286	0.00075		0.78	1.04e-05	1.99e-05	3.26e-05	4.71e-05	6.33e-05	8.2e-05	0.000102	0.000122	0.000144	0.000166	0.000189	0.000212	0.000238
	2.58	0.000463571	0.000482143	0.000498571	0.000515	0.000533571	0.000554286	0.000576429	0.000603571	0.000630714	0.000657857	0.000685	0.000714286	0.00075		0.79	1.04e-05	2.02e-05	3.31e-05	4.75e-05	6.41e-05	8.28e-05	0.000103	0.000124	0.000146	0.000169	0.000192	0.000215	0.000241
	2.59	0.000462857	0.000481429	0.000498571	0.000513571	0.000534286	0.000554286	0.000577143	0.000602857	0.00063	0.000657143	0.000686429	0.000714286	0.00075		0.8	1.07e-05	2.05e-05	3.35e-05	4.83e-05	6.51e-05	8.45e-05	0.000105	0.000126	0.000148	0.000171	0.000194	0.000218	0.000245
	2.6	0.000463571	0.000480714	0.000497857	0.000514286	0.000534286	0.000554286	0.000577143	0.000602857	0.000630714	0.000657857	0.000687143	0.000714286	0.00075		0.81	1.08e-05	2.08e-05	3.41e-05	4.91e-05	6.61e-05	8.58e-05	0.000106	0.000128	0.00015	0.000174	0.000196	0.000221	0.000248
	2.62	0.000462857	0.000480714	0.000498571	0.000514286	0.000535	0.000555714	0.000577143	0.000603571	0.000630714	0.000658571	0.000687143	0.000721429	0.00075		0.82	1.11e-05	2.09e-05	3.46e-05	4.97e-05	6.72e-05	8.69e-05	0.000107	0.00013	0.000152	0.000176	0.0002	0.000224	0.000252
	2.63	0.000462143	0.000480714	0.000496429	0.000514286	0.000533571	0.000556429	0.000577857	0.000603571	0.000629286	0.000659286	0.000687857	0.000721429	0.00075		0.83	1.14e-05	2.13e-05	3.5e-05	5.03e-05	6.78e-05	8.77e-05	0.000109	0.000131	0.000155	0.000179	0.000202	0.000227	0.000255
	2.65	0.000462143	0.00048	0.000496429	0.000512857	0.000534286	0.000555714	0.000577857	0.000604286	0.00063	0.000660714	0.000688571	0.000721429	0.000757143		0.84	1.15e-05	2.16e-05	3.56e-05	5.11e-05	6.9e-05	8.91e-05	0.00011	0.000133	0.000156	0.000181	0.000205	0.00023	0.000258
	2.66	0.000462143	0.00048	0.000496429	0.000512143	0.000534286	0.000556429	0.000579286	0.000603571	0.000630714	0.000660714	0.000688571	0.000721429	0.000757143		0.85	1.17e-05	2.21e-05	3.61e-05	5.17e-05	6.99e-05	9.04e-05	0.000112	0.000135	0.000158	0.000183	0.000208	0.000233	0.000261
	2.67	0.000461429	0.00048	0.000496429	0.000512143	0.000535	0.000556429	0.000578571	0.000605	0.000630714	0.00066	0.00069	0.000721429	0.000757143		0.86	1.19e-05	2.25e-05	3.66e-05	5.25e-05	7.09e-05	9.12e-05	0.000113	0.000136	0.00016	0.000186	0.00021	0.000237	0.000264
	2.69	0.000463571	0.000479286	0.000495714	0.000511429	0.000533571	0.000556429	0.000579286	0.000605	0.000632143	0.000661429	0.00069	0.000721429	0.000757143		0.87	1.2e-05	2.27e-05	3.7e-05	5.33e-05	7.17e-05	9.24e-05	0.000115	0.000138	0.000162	0.000188	0.000213	0.00024	0.000268
	2.7	0.000462857	0.00048	0.000496429	0.000512143	0.000534286	0.000556429	0.000579286	0.000605	0.000632143	0.000660714	0.00069	0.000721429	0.000757143		0.88	1.24e-05	2.34e-05	3.75e-05	5.37e-05	7.27e-05	9.38e-05	0.000116	0.00014	0.000164	0.00019	0.000216	0.000243	0.000272
	2.71	0.000463571	0.000479286	0.000496429	0.000512143	0.000534286	0.000557857	0.000579286	0.000605	0.000632143	0.000661429	0.000690714	0.000721429	0.000757143		0.89	1.27e-05	2.36e-05	3.82e-05	5.46e-05	7.37e-05	9.5e-05	0.000118	0.000142	0.000166	0.000193	0.000219	0.000246	0.000275
	2.73	0.000462857	0.000479286	0.000495714	0.000512143	0.000532857	0.000557143	0.000579286	0.000605	0.000632143	0.000661429	0.000691429	0.000721429	0.000757143		0.9	1.29e-05	2.37e-05	3.84e-05	5.51e-05	7.43e-05	9.59e-05	0.000119	0.000143	0.000168	0.000195	0.000221	0.000249	0.000278
	2.74	0.000463571	0.000479286	0.000495714	0.000512857	0.000532143	0.000556429	0.000579286	0.000605714	0.000634286	0.000662143	0.000692143	0.000728571	0.000764286		0.91	1.31e-05	2.41e-05	3.93e-05	5.6e-05	7.53e-05	9.71e-05	0.000121	0.000145	0.00017	0.000197	0.000224	0.000252	0.000282
	2.75	0.000463571	0.000479286	0.000495	0.000513571	0.000532857	0.000556429	0.000579286	0.000606429	0.000634286	0.000663571	0.000692143	0.000728571	0.000764286		0.92	1.31e-05	2.48e-05	3.97e-05	5.65e-05	7.63e-05	9.83e-05	0.000122	0.000147	0.000173	0.0002	0.000227	0.000255	0.000286
	2.77	0.000464286	0.000479286	0.000495	0.000513571	0.000532857	0.000556429	0.000580714	0.000606429	0.000634286	0.000662857	0.000692143	0.000728571	0.000764286		0.93	1.32e-05	2.47e-05	4.01e-05	5.75e-05	7.7e-05	9.96e-05	0.000124	0.000149	0.000174	0.000202	0.00023	0.000257	0.000289
	2.78	0.000464286	0.00048	0.000495	0.000512143	0.000532857	0.000555714	0.000580714	0.000607143	0.000635	0.000663571	0.000693571	0.000728571	0.000764286		0.94	1.36e-05	2.52e-05	4.04e-05	5.8e-05	7.8e-05	0.0001	0.000125	0.00015	0.000177	0.000204	0.000232	0.000261	0.000292
	2.8	0.000464286	0.00048	0.000494286	0.000512143	0.000533571	0.000556429	0.000580714	0.000607143	0.000635	0.000663571	0.000694286	0.000728571	0.000764286		0.95	1.36e-05	2.54e-05	4.11e-05	5.91e-05	7.93e-05	0.000102	0.000126	0.000152	0.000179	0.000206	0.000235	0.000264	0.000296
	2.81	0.000465714	0.00048	0.000495	0.000512143	0.000533571	0.000556429	0.000580714	0.000606429	0.000635	0.000665	0.000695	0.000728571	0.000764286		0.96	1.38e-05	2.61e-05	4.17e-05	5.96e-05	7.99e-05	0.000103	0.000128	0.000154	0.00018	0.000208	0.000238	0.000267	0.000298
	2.82	0.000465714	0.00048	0.000495	0.000512857	0.000532143	0.000556429	0.000581429	0.000606429	0.000635	0.000665	0.000695	0.000728571	0.000764286		0.97	1.41e-05	2.64e-05	4.19e-05	6.03e-05	8.1e-05	0.000104	0.000129	0.000155	0.000183	0.00021	0.00024	0.00027	0.000302
	2.84	0.000465714	0.00048	0.000495714	0.000512857	0.000532857	0.000556429	0.000581429	0.000606429	0.000635714	0.000665714	0.000695714	0.000728571	0.000764286		0.98	1.41e-05	2.69e-05	4.24e-05	6.11e-05	8.2e-05	0.000106	0.000131	0.000157	0.000185	0.000213	0.000243	0.000273	0.000305
	2.85	0.000465714	0.00048	0.000495714	0.000512143	0.000533571	0.000555	0.000581429	0.000606429	0.000635714	0.000666429	0.000696429	0.000728571	0.000771429		0.99	1.45e-05	2.69e-05	4.33e-05	6.17e-05	8.28e-05	0.000107	0.000132	0.000159	0.000187	0.000216	0.000246	0.000275	0.000308
	2.86	0.000467143	0.000480714	0.000495714	0.000512143	0.000533571	0.000555	0.000580714	0.000607857	0.000636429	0.000667143	0.000696429	0.000728571	0.000771429		1	1.45e-05	2.74e-05	4.37e-05	6.26e-05	8.41e-05	0.000108	0.000134	0.00016	0.000189	0.000218	0.000248	0.000278	0.000312
	2.88	0.000466429	0.000481429	0.000497857	0.000512143	0.000534286	0.000555	0.000581429	0.000608571	0.000637857	0.000667143	0.000697143	0.000735714	0.000771429		1.01	1.48e-05	2.76e-05	4.44e-05	6.36e-05	8.5e-05	0.000109	0.000135	0.000162	0.000191	0.000221	0.000251	0.000282	0.000315
	2.89	0.000467143	0.00048	0.000496429	0.000512857	0.000534286	0.000555714	0.000582143	0.000608571	0.000637857	0.000667857	0.000698571	0.000735714	0.000771429		1.02	1.5e-05	2.82e-05	4.47e-05	6.42e-05	8.61e-05	0.00011	0.000137	0.000164	0.000193	0.000223	0.000254	0.000285	0.000318
	2.9	0.000467143	0.000481429	0.000496429	0.000512857	0.000534286	0.000556429	0.000581429	0.000608571	0.000638571	0.000669286	0.000698571	0.000735714	0.000771429		1.03	1.55e-05	2.87e-05	4.53e-05	6.49e-05	8.7e-05	0.000112	0.000138	0.000166	0.000195	0.000226	0.000256	0.000288	0.000322
	2.92	0.000468571	0.000480714	0.000497143	0.000513571	0.000534286	0.000557143	0.000582143	0.000610714	0.000638571	0.000669286	0.000699286	0.000735714	0.000771429		1.04	1.57e-05	2.92e-05	4.59e-05	6.57e-05	8.8e-05	0.000113	0.000139	0.000167	0.000197	0.000228	0.000259	0.000291	0.000325
	2.93	0.00047	0.000481429	0.000496429	0.000512857	0.000534286	0.000557857	0.000582857	0.000610714	0.000638571	0.00067	0.000700714	0.000735714	0.000771429		1.05	1.59e-05	2.94e-05	4.66e-05	6.65e-05	8.91e-05	0.000114	0.000141	0.000169	0.000199	0.00023	0.000262	0.000294	0.000328
	2.95	0.000470714	0.000481429	0.000496429	0.000513571	0.000535	0.000557857	0.000583571	0.000610714	0.00064	0.00067	0.000701429	0.000735714	0.000771429		1.06	1.61e-05	3.01e-05	4.69e-05	6.7e-05	8.99e-05	0.000115	0.000142	0.000171	0.000201	0.000233	0.000264	0.000297	0.000331
	2.96	0.000471429	0.000480714	0.000496429	0.000514286	0.000535	0.000558571	0.000584286	0.000610714	0.00064	0.00067	0.000702143	0.000735714	0.000771429		1.07	1.65e-05	3.04e-05	4.78e-05	6.77e-05	9.08e-05	0.000116	0.000144	0.000172	0.000203	0.000235	0.000267	0.0003	0.000335
	2.97	0.000471429	0.000480714	0.000495714	0.000514286	0.000534286	0.000557857	0.000583571	0.000611429	0.000640714	0.000670714	0.000702857	0.000735714	0.000778571		1.08	1.68e-05	3.09e-05	4.82e-05	6.82e-05	9.19e-05	0.000117	0.000145	0.000174	0.000205	0.000237	0.00027	0.000303	0.000339
	2.99	0.000471429	0.000481429	0.000496429	0.000515	0.000535	0.000557143	0.000582857	0.000611429	0.000641429	0.000671429	0.000704286	0.000735714	0.000778571		1.09	1.7e-05	3.12e-05	4.87e-05	6.89e-05	9.25e-05	0.000119	0.000147	0.000176	0.000207	0.00024	0.000272	0.000307	0.000342
	3	0.000471429	0.000482857	0.000497143	0.000514286	0.000535	0.000557143	0.000584286	0.000612143	0.000641429	0.000672143	0.000703571	0.000742857	0.000778571		1.1	1.71e-05	3.15e-05	4.89e-05	6.99e-05	9.37e-05	0.00012	0.000148	0.000178	0.00021	0.000243	0.000275	0.000309	0.000345

## Sheet: F3d-f
F3d					F3e		Cd-MoS2		Cr/Au-MoS2		F3f		Cd-MoS2		Cr/Au-MoS2
	Vgs=(20v)	X (nm)	Y(Ω μm)			Vgs (V)	Ids (A/μm)	Vgs (V)	Ids (A/μm)			Vds (V)	Ids (A/μm)	Vds (V)	Ids (A/μm)
		130	1100			-60	1.242e-12	-60	4.25714e-12			-1.1	-4.45298e-05	-1.1	-1.40851e-06
		150	1250			-59.4	9.075e-13	-59.4	2.16829e-12			-1.09	-4.40875e-05	-1.09	-1.38799e-06
		215	1900			-58.8	7.18e-13	-58.8	1.71043e-12			-1.08	-4.36612e-05	-1.08	-1.3641e-06
		310	2690.3			-58.2	6.055e-13	-58.2	1.65871e-12			-1.07	-4.32372e-05	-1.07	-1.34485e-06
		400	3300			-57.6	4.79e-13	-57.6	1.63114e-12			-1.06	-4.28117e-05	-1.06	-1.31881e-06
		600	4791.9			-57	3.7e-13	-57	1.60671e-12			-1.05	-4.23669e-05	-1.05	-1.28146e-06
	Vgs=(30v)	X (nm)	Y(Ω μm)			-56.4	3.42e-13	-56.4	1.85443e-12			-1.04	-4.1929e-05	-1.04	-1.2634e-06
		130	928.006			-55.8	3.4e-13	-55.8	2.075e-12			-1.03	-4.14959e-05	-1.03	-1.24276e-06
		150	1063.1			-55.2	2.66e-13	-55.2	1.98414e-12			-1.02	-4.10945e-05	-1.02	-1.21472e-06
		215	1590.04			-54.6	2.045e-13	-54.6	1.86343e-12			-1.01	-4.06774e-05	-1.01	-1.19503e-06
		300	2142.35			-54	2.335e-13	-54	1.81157e-12			-1	-4.02795e-05	-1	-1.15079e-06
		400	2757.14			-53.4	2.105e-13	-53.4	1.46157e-12			-0.99	-3.98747e-05	-0.99	-1.13327e-06
		600	3862.41			-52.8	1.25e-13	-52.8	1.31529e-12			-0.98	-3.94522e-05	-0.98	-1.12494e-06
	Vgs=(40v)	X (nm)	Y(Ω μm)			-52.2	1.26e-13	-52.2	1.253e-12			-0.97	-3.90427e-05	-0.97	-1.11194e-06
		130	813.669			-51.6	1.48e-13	-51.6	1.06929e-12			-0.96	-3.86001e-05	-0.96	-1.09434e-06
		150	961.803			-51	1.19e-13	-51	9.93571e-13			-0.95	-3.81684e-05	-0.95	-1.07627e-06
		215	1389.56			-50.4	7.35e-14	-50.4	8.60857e-13			-0.94	-3.77711e-05	-0.94	-1.05994e-06
		300	1870.14			-49.8	7.65e-14	-49.8	8.12571e-13			-0.93	-3.73763e-05	-0.93	-1.03912e-06
		400	2285.71			-49.2	1.21e-13	-49.2	7.35286e-13			-0.92	-3.69603e-05	-0.92	-1.02169e-06
		600	3333.33			-48.6	1.095e-13	-48.6	7.07143e-13			-0.91	-3.6554e-05	-0.91	-1.01851e-06
						-48	7.8e-14	-48	6.70429e-13			-0.9	-3.61298e-05	-0.9	-1.02206e-06
						-47.4	1.345e-13	-47.4	6.15429e-13			-0.89	-3.572e-05	-0.89	-9.92755e-07
						-46.8	1.315e-13	-46.8	5.22857e-13			-0.88	-3.53273e-05	-0.88	-9.7107e-07
						-46.2	1.98e-13	-46.2	4.78143e-13			-0.87	-3.48992e-05	-0.87	-9.48715e-07
						-45.6	3.22e-13	-45.6	4.54571e-13			-0.86	-3.4497e-05	-0.86	-9.21625e-07
						-45	4.615e-13	-45	4.12143e-13			-0.85	-3.40719e-05	-0.85	-8.99455e-07
						-44.4	9.555e-13	-44.4	4.06429e-13			-0.84	-3.36516e-05	-0.84	-8.86985e-07
						-43.8	1.564e-12	-43.8	3.76571e-13			-0.83	-3.32398e-05	-0.83	-8.6688e-07
						-43.2	3.1275e-12	-43.2	3.79286e-13			-0.82	-3.28238e-05	-0.82	-8.39175e-07
						-42.6	5.4215e-12	-42.6	4.02714e-13			-0.81	-3.24246e-05	-0.81	-8.27615e-07
						-42	1.08875e-11	-42	4.39857e-13			-0.8	-3.20169e-05	-0.8	-7.98555e-07
						-41.4	2.05355e-11	-41.4	4.21714e-13			-0.79	-3.1609e-05	-0.79	-7.9077e-07
						-40.8	3.61375e-11	-40.8	5.11571e-13			-0.78	-3.1178e-05	-0.78	-7.749e-07
						-40.2	6.46865e-11	-40.2	5.59857e-13			-0.77	-3.07868e-05	-0.77	-7.5863e-07
						-39.6	1.14568e-10	-39.6	6.42429e-13			-0.76	-3.03801e-05	-0.76	-7.4846e-07
						-39	1.94183e-10	-39	7.71714e-13			-0.75	-2.99968e-05	-0.75	-7.28995e-07
						-38.4	3.18938e-10	-38.4	9.99429e-13			-0.74	-2.95666e-05	-0.74	-7.18615e-07
						-37.8	4.65835e-10	-37.8	1.28271e-12			-0.73	-2.91546e-05	-0.73	-7.0141e-07
						-37.2	7.5885e-10	-37.2	1.64457e-12			-0.72	-2.87664e-05	-0.72	-6.8944e-07
						-36.6	1.24234e-09	-36.6	2.21543e-12			-0.71	-2.83595e-05	-0.71	-6.68805e-07
						-36	1.84505e-09	-36	2.88671e-12			-0.7	-2.79265e-05	-0.7	-6.56995e-07
						-35.4	2.81368e-09	-35.4	3.58257e-12			-0.69	-2.75086e-05	-0.69	-6.39855e-07
						-34.8	4.13372e-09	-34.8	4.78529e-12			-0.68	-2.71185e-05	-0.68	-6.19055e-07
						-34.2	5.80055e-09	-34.2	6.19129e-12			-0.67	-2.66981e-05	-0.67	-6.05185e-07
						-33.6	7.9818e-09	-33.6	8.21971e-12			-0.66	-2.62915e-05	-0.66	-5.9389e-07
						-33	1.0561e-08	-33	1.10473e-11			-0.65	-2.58874e-05	-0.65	-5.8304e-07
						-32.4	1.37714e-08	-32.4	1.4183e-11			-0.64	-2.54871e-05	-0.64	-5.58595e-07
						-31.8	1.82547e-08	-31.8	1.83207e-11			-0.63	-2.50566e-05	-0.63	-5.51245e-07
						-31.2	2.39354e-08	-31.2	2.41731e-11			-0.62	-2.46574e-05	-0.62	-5.26505e-07
						-30.6	2.98408e-08	-30.6	3.05524e-11			-0.61	-2.42474e-05	-0.61	-5.19155e-07
						-30	3.74959e-08	-30	3.90254e-11			-0.6	-2.38467e-05	-0.6	-5.07315e-07
						-29.4	4.76574e-08	-29.4	5.11681e-11			-0.59	-2.34578e-05	-0.59	-4.92456e-07
						-28.8	5.8033e-08	-28.8	6.49954e-11			-0.58	-2.30469e-05	-0.58	-4.72448e-07
						-28.2	7.0389e-08	-28.2	7.96043e-11			-0.57	-2.26396e-05	-0.57	-4.62197e-07
						-27.6	8.6605e-08	-27.6	9.68726e-11			-0.56	-2.22436e-05	-0.56	-4.36768e-07
						-27	1.02875e-07	-27	1.21877e-10			-0.55	-2.18215e-05	-0.55	-4.29447e-07
						-26.4	1.21763e-07	-26.4	1.39359e-10			-0.54	-2.14319e-05	-0.54	-4.20039e-07
						-25.8	1.42855e-07	-25.8	1.71223e-10			-0.53	-2.10211e-05	-0.53	-3.99589e-07
						-25.2	1.64661e-07	-25.2	2.15721e-10			-0.52	-2.06199e-05	-0.52	-3.87557e-07
						-24.6	1.89899e-07	-24.6	2.59144e-10			-0.51	-2.02256e-05	-0.51	-3.78851e-07
						-24	2.2147e-07	-24	3.16759e-10			-0.5	-1.98305e-05	-0.5	-3.78227e-07
						-23.4	2.54449e-07	-23.4	3.80399e-10			-0.49	-1.94299e-05	-0.49	-3.63703e-07
						-22.8	2.97004e-07	-22.8	4.59647e-10			-0.48	-1.90286e-05	-0.48	-3.48007e-07
						-22.2	3.34714e-07	-22.2	5.39024e-10			-0.47	-1.86165e-05	-0.47	-3.33733e-07
						-21.6	3.82577e-07	-21.6	6.2301e-10			-0.46	-1.82351e-05	-0.46	-3.23144e-07
						-21	4.36882e-07	-21	7.45476e-10			-0.45	-1.78219e-05	-0.45	-3.13731e-07
						-20.4	4.85172e-07	-20.4	8.86039e-10			-0.44	-1.74207e-05	-0.44	-3.0316e-07
						-19.8	5.43876e-07	-19.8	1.05035e-09			-0.43	-1.70116e-05	-0.43	-2.83763e-07
						-19.2	6.1166e-07	-19.2	1.20678e-09			-0.42	-1.6623e-05	-0.42	-2.71136e-07
						-18.6	6.79395e-07	-18.6	1.39568e-09			-0.41	-1.62169e-05	-0.41	-2.60903e-07
						-18	7.4835e-07	-18	1.55657e-09			-0.4	-1.58119e-05	-0.4	-2.51927e-07
						-17.4	8.2448e-07	-17.4	1.8105e-09			-0.39	-1.54145e-05	-0.39	-2.41146e-07
						-16.8	9.2049e-07	-16.8	2.09273e-09			-0.38	-1.50132e-05	-0.38	-2.32098e-07
						-16.2	9.9889e-07	-16.2	2.39551e-09			-0.37	-1.46148e-05	-0.37	-2.19792e-07
						-15.6	1.10221e-06	-15.6	2.78123e-09			-0.36	-1.42162e-05	-0.36	-2.13123e-07
						-15	1.17942e-06	-15	3.11631e-09			-0.35	-1.38122e-05	-0.35	-2.04675e-07
						-14.4	1.28502e-06	-14.4	3.5569e-09			-0.34	-1.34323e-05	-0.34	-1.95999e-07
						-13.8	1.39519e-06	-13.8	4.06497e-09			-0.33	-1.30263e-05	-0.33	-1.83986e-07
						-13.2	1.50074e-06	-13.2	4.54219e-09			-0.32	-1.26425e-05	-0.32	-1.75152e-07
						-12.6	1.62914e-06	-12.6	5.05544e-09			-0.31	-1.22488e-05	-0.31	-1.65103e-07
						-12	1.75317e-06	-12	5.63097e-09			-0.3	-1.1849e-05	-0.3	-1.57371e-07
						-11.4	1.89995e-06	-11.4	6.3541e-09			-0.29	-1.14507e-05	-0.29	-1.48005e-07
						-10.8	2.0359e-06	-10.8	7.0903e-09			-0.28	-1.10485e-05	-0.28	-1.40894e-07
						-10.2	2.17679e-06	-10.2	7.95666e-09			-0.27	-1.06501e-05	-0.27	-1.321e-07
						-9.6	2.33655e-06	-9.6	8.86747e-09			-0.26	-1.02598e-05	-0.26	-1.23237e-07
						-9	2.50957e-06	-9	1.00097e-08			-0.25	-9.86785e-06	-0.25	-1.15709e-07
						-8.4	2.67904e-06	-8.4	1.1116e-08			-0.24	-9.46275e-06	-0.24	-1.08852e-07
						-7.8	2.85851e-06	-7.8	1.24632e-08			-0.23	-9.0644e-06	-0.23	-1.01637e-07
						-7.2	3.06452e-06	-7.2	1.36924e-08			-0.22	-8.6666e-06	-0.22	-9.25245e-08
						-6.6	3.23693e-06	-6.6	1.49135e-08			-0.21	-8.2681e-06	-0.21	-8.49735e-08
						-6	3.42652e-06	-6	1.65404e-08			-0.2	-7.8751e-06	-0.2	-8.0224e-08
						-5.4	3.64395e-06	-5.4	1.83437e-08			-0.19	-7.47875e-06	-0.19	-7.3864e-08
						-4.8	3.84415e-06	-4.8	2.00423e-08			-0.18	-7.0888e-06	-0.18	-6.80955e-08
						-4.2	4.05317e-06	-4.2	2.17789e-08			-0.17	-6.6939e-06	-0.17	-6.3151e-08
						-3.6	4.27715e-06	-3.6	2.34727e-08			-0.16	-6.2967e-06	-0.16	-5.7818e-08
						-3	4.50192e-06	-3	2.57376e-08			-0.15	-5.904e-06	-0.15	-5.3184e-08
						-2.4	4.72029e-06	-2.4	2.77736e-08			-0.14	-5.50855e-06	-0.14	-4.94594e-08
						-1.8	4.97516e-06	-1.8	2.98459e-08			-0.13	-5.1148e-06	-0.13	-4.25643e-08
						-1.2	5.22317e-06	-1.2	3.19961e-08			-0.12	-4.71363e-06	-0.12	-3.85071e-08
						-0.6	5.45624e-06	-0.6	3.49421e-08			-0.11	-4.3199e-06	-0.11	-3.47109e-08
						0	5.74035e-06	0	3.72043e-08			-0.1	-3.9314e-06	-0.1	-3.04635e-08
						0.6	6.0096e-06	0.6	3.98546e-08			-0.09	-3.53756e-06	-0.09	-2.73447e-08
						1.2	6.22695e-06	1.2	4.27277e-08			-0.08	-3.14633e-06	-0.08	-2.3104e-08
						1.8	6.52875e-06	1.8	4.5737e-08			-0.07	-2.75268e-06	-0.07	-2.03229e-08
						2.4	6.8772e-06	2.4	4.89531e-08			-0.06	-2.35848e-06	-0.06	-1.6429e-08
						3	7.116e-06	3	5.18441e-08			-0.05	-1.96564e-06	-0.05	-1.44063e-08
						3.6	7.4427e-06	3.6	5.53346e-08			-0.04	-1.57281e-06	-0.04	-1.09077e-08
						4.2	7.7396e-06	4.2	5.85519e-08			-0.03	-1.17999e-06	-0.03	-8.13285e-09
						4.8	8.0672e-06	4.8	6.24869e-08			-0.02	-7.88085e-07	-0.02	-5.30845e-09
						5.4	8.27225e-06	5.4	6.60519e-08			-0.01	-3.93039e-07	-0.01	-2.74179e-09
						6	8.5526e-06	6	6.97074e-08			0	-5.32118e-10	0	-6.0757e-12
						6.6	8.8569e-06	6.6	7.39026e-08			0.01	3.8817e-07	0.01	2.54802e-09
						7.2	9.25265e-06	7.2	7.75744e-08			0.02	7.80495e-07	0.02	4.38341e-09
						7.8	9.6458e-06	7.8	8.1968e-08			0.03	1.17176e-06	0.03	7.1269e-09
						8.4	9.9603e-06	8.4	8.6004e-08			0.04	1.56409e-06	0.04	1.00596e-08
						9	1.0309e-05	9	9.003e-08			0.05	1.95595e-06	0.05	1.27568e-08
						9.6	1.05346e-05	9.6	9.44627e-08			0.06	2.34764e-06	0.06	1.54304e-08
						10.2	1.08823e-05	10.2	9.96546e-08			0.07	2.73636e-06	0.07	1.70248e-08
						10.8	1.11829e-05	10.8	1.04302e-07			0.08	3.12712e-06	0.08	1.98429e-08
						11.4	1.15878e-05	11.4	1.09013e-07			0.09	3.51925e-06	0.09	2.33051e-08
						12	1.19419e-05	12	1.13598e-07			0.1	3.90956e-06	0.1	2.60567e-08
						12.6	1.22586e-05	12.6	1.18735e-07			0.11	4.3042e-06	0.11	2.82595e-08
						13.2	1.2717e-05	13.2	1.2373e-07			0.12	4.69132e-06	0.12	3.17917e-08
						13.8	1.30543e-05	13.8	1.28839e-07			0.13	5.08179e-06	0.13	3.68306e-08
						14.4	1.34468e-05	14.4	1.34144e-07			0.14	5.46664e-06	0.14	4.00363e-08
						15	1.3706e-05	15	1.39218e-07			0.15	5.8591e-06	0.15	4.56709e-08
						15.6	1.41446e-05	15.6	1.45633e-07			0.16	6.2494e-06	0.16	4.90301e-08
						16.2	1.43639e-05	16.2	1.50724e-07			0.17	6.6418e-06	0.17	5.324e-08
						16.8	1.47225e-05	16.8	1.55882e-07			0.18	7.03355e-06	0.18	5.8069e-08
						17.4	1.5068e-05	17.4	1.61712e-07			0.19	7.4196e-06	0.19	6.17855e-08
						18	1.54852e-05	18	1.6779e-07			0.2	7.81115e-06	0.2	6.5781e-08
						18.6	1.58132e-05	18.6	1.73773e-07			0.21	8.20095e-06	0.21	7.16685e-08
						19.2	1.63466e-05	19.2	1.79244e-07			0.22	8.5978e-06	0.22	7.64925e-08
						19.8	1.66812e-05	19.8	1.8472e-07			0.23	8.98755e-06	0.23	8.1974e-08
						20.4	1.69968e-05	20.4	1.91053e-07			0.24	9.3785e-06	0.24	8.53315e-08
						21	1.73054e-05	21	1.97134e-07			0.25	9.76035e-06	0.25	9.1746e-08
						21.6	1.77682e-05	21.6	2.03424e-07			0.26	1.01529e-05	0.26	9.52365e-08
						22.2	1.82226e-05	22.2	2.1001e-07			0.27	1.0534e-05	0.27	1.02279e-07
						22.8	1.85323e-05	22.8	2.1669e-07			0.28	1.09211e-05	0.28	1.06499e-07
						23.4	1.89301e-05	23.4	2.23236e-07			0.29	1.131e-05	0.29	1.15106e-07
						24	1.94486e-05	24	2.29281e-07			0.3	1.16924e-05	0.3	1.21975e-07
						24.6	1.98166e-05	24.6	2.35187e-07			0.31	1.20768e-05	0.31	1.2895e-07
						25.2	2.02933e-05	25.2	2.42237e-07			0.32	1.24723e-05	0.32	1.37333e-07
						25.8	2.06483e-05	25.8	2.49159e-07			0.33	1.28567e-05	0.33	1.41935e-07
						26.4	2.0998e-05	26.4	2.55576e-07			0.34	1.32503e-05	0.34	1.48917e-07
						27	2.13239e-05	27	2.62383e-07			0.35	1.36221e-05	0.35	1.54702e-07
						27.6	2.18106e-05	27.6	2.68819e-07			0.36	1.40077e-05	0.36	1.629e-07
						28.2	2.24051e-05	28.2	2.76006e-07			0.37	1.44022e-05	0.37	1.67722e-07
						28.8	2.28032e-05	28.8	2.82623e-07			0.38	1.47843e-05	0.38	1.78419e-07
						29.4	2.29996e-05	29.4	2.89857e-07			0.39	1.51687e-05	0.39	1.85069e-07
						30	2.38046e-05	30	2.96833e-07			0.4	1.55618e-05	0.4	1.90962e-07
						30.6	2.42273e-05	30.6	3.03949e-07			0.41	1.59533e-05	0.41	1.95527e-07
						31.2	2.45788e-05	31.2	3.11289e-07			0.42	1.63499e-05	0.42	2.01712e-07
						31.8	2.5047e-05	31.8	3.19027e-07			0.43	1.67218e-05	0.43	2.09029e-07
						32.4	2.55192e-05	32.4	3.26194e-07			0.44	1.71091e-05	0.44	2.14995e-07
						33	2.58505e-05	33	3.33781e-07			0.45	1.7491e-05	0.45	2.24111e-07
						33.6	2.6393e-05	33.6	3.42383e-07			0.46	1.78836e-05	0.46	2.29535e-07
						34.2	2.66726e-05	34.2	3.50304e-07			0.47	1.8267e-05	0.47	2.3608e-07
						34.8	2.70469e-05	34.8	3.57044e-07			0.48	1.86478e-05	0.48	2.44842e-07
						35.4	2.75061e-05	35.4	3.64391e-07			0.49	1.90446e-05	0.49	2.50499e-07
						36	2.78722e-05	36	3.72551e-07			0.5	1.9427e-05	0.5	2.59194e-07
						36.6	2.8214e-05	36.6	3.7909e-07			0.51	1.98319e-05	0.51	2.6705e-07
						37.2	2.85959e-05	37.2	3.87314e-07			0.52	2.02001e-05	0.52	2.74696e-07
						37.8	2.90499e-05	37.8	3.95526e-07			0.53	2.05876e-05	0.53	2.72306e-07
						38.4	2.93989e-05	38.4	4.04513e-07			0.54	2.09864e-05	0.54	2.83471e-07
						39	2.99215e-05	39	4.11393e-07			0.55	2.13696e-05	0.55	2.89755e-07
						39.6	3.0707e-05	39.6	4.19684e-07			0.56	2.17569e-05	0.56	2.96397e-07
						40.2	3.12336e-05	40.2	4.28116e-07			0.57	2.21501e-05	0.57	3.09847e-07
						40.8	3.16893e-05	40.8	4.34801e-07			0.58	2.25204e-05	0.58	3.14648e-07
						41.4	3.19924e-05	41.4	4.44011e-07			0.59	2.29119e-05	0.59	3.19675e-07
						42	3.25501e-05	42	4.51413e-07			0.6	2.33122e-05	0.6	3.30898e-07
						42.6	3.27869e-05	42.6	4.58407e-07			0.61	2.36913e-05	0.61	3.34499e-07
						43.2	3.30821e-05	43.2	4.6689e-07			0.62	2.4073e-05	0.62	3.4612e-07
						43.8	3.37023e-05	43.8	4.74237e-07			0.63	2.4443e-05	0.63	3.57405e-07
						44.4	3.41087e-05	44.4	4.83004e-07			0.64	2.48149e-05	0.64	3.60101e-07
						45	3.47772e-05	45	4.91199e-07			0.65	2.52033e-05	0.65	3.75987e-07
						45.6	3.51046e-05	45.6	4.99749e-07			0.66	2.55944e-05	0.66	3.6401e-07
						46.2	3.50551e-05	46.2	5.09029e-07			0.67	2.59794e-05	0.67	3.69565e-07
						46.8	3.61938e-05	46.8	5.17423e-07			0.68	2.64022e-05	0.68	3.73423e-07
						47.4	3.7177e-05	47.4	5.24836e-07			0.69	2.67591e-05	0.69	3.92399e-07
						48	3.75528e-05	48	5.32501e-07			0.7	2.71437e-05	0.7	4.16547e-07
						48.6	3.78787e-05	48.6	5.41593e-07			0.71	2.75197e-05	0.71	4.27647e-07
						49.2	3.82791e-05	49.2	5.50587e-07			0.72	2.79046e-05	0.72	4.27733e-07
						49.8	3.85114e-05	49.8	5.58296e-07			0.73	2.82947e-05	0.73	4.42635e-07
						50.4	3.87224e-05	50.4	5.66753e-07			0.74	2.87005e-05	0.74	4.49765e-07
						51	3.89944e-05	51	5.76874e-07			0.75	2.90821e-05	0.75	4.57707e-07
						51.6	3.96988e-05	51.6	5.84613e-07			0.76	2.94424e-05	0.76	4.67229e-07
						52.2	4.01286e-05	52.2	5.92426e-07			0.77	2.98178e-05	0.77	4.72962e-07
						52.8	4.08708e-05	52.8	6.0173e-07			0.78	3.02058e-05	0.78	4.78395e-07
						53.4	4.14113e-05	53.4	6.1054e-07			0.79	3.05653e-05	0.79	4.98467e-07
						54	4.1846e-05	54	6.17596e-07			0.8	3.0953e-05	0.8	5.05095e-07
						54.6	4.17238e-05	54.6	6.2721e-07			0.81	3.13512e-05	0.81	5.12845e-07
						55.2	4.20031e-05	55.2	6.36886e-07			0.82	3.17399e-05	0.82	5.16295e-07
						55.8	4.24237e-05	55.8	6.46363e-07			0.83	3.21288e-05	0.83	5.1979e-07
						56.4	4.28375e-05	56.4	6.53619e-07			0.84	3.25357e-05	0.84	5.2693e-07
						57	4.29964e-05	57	6.63294e-07			0.85	3.29152e-05	0.85	5.21725e-07
						57.6	4.37277e-05	57.6	6.72201e-07			0.86	3.32646e-05	0.86	5.4295e-07
						58.2	4.39691e-05	58.2	6.79649e-07			0.87	3.36449e-05	0.87	5.59125e-07
						58.8	4.56446e-05	58.8	6.90131e-07			0.88	3.40159e-05	0.88	5.7119e-07
						59.4	4.59897e-05	59.4	6.98991e-07			0.89	3.44018e-05	0.89	5.77405e-07
						60	4.67743e-05	60	7.06991e-07			0.9	3.48042e-05	0.9	5.84745e-07
												0.91	3.51558e-05	0.91	6.05125e-07
												0.92	3.55581e-05	0.92	5.91435e-07
												0.93	3.59496e-05	0.93	6.3835e-07
												0.94	3.63099e-05	0.94	6.45605e-07
												0.95	3.67107e-05	0.95	6.2835e-07
												0.96	3.70697e-05	0.96	6.4901e-07
												0.97	3.74743e-05	0.97	6.7901e-07
												0.98	3.78744e-05	0.98	6.8958e-07
												0.99	3.8208e-05	0.99	6.9511e-07
												1	3.85936e-05	1	6.99755e-07
												1.01	3.90154e-05	1.01	6.94235e-07
												1.02	3.93911e-05	1.02	7.05645e-07
												1.03	3.97552e-05	1.03	7.32775e-07
												1.04	4.01092e-05	1.04	7.2585e-07
												1.05	4.05302e-05	1.05	7.3648e-07
												1.06	4.08824e-05	1.06	7.3862e-07
												1.07	4.12532e-05	1.07	7.40025e-07
												1.08	4.16466e-05	1.08	7.6929e-07
												1.09	4.2058e-05	1.09	8.5506e-07
												1.1	4.2388e-05	1.1	8.6612e-07

## Sheet: F4a
	30K	50K	80K	100K	120K	140K	160K	180K	200K	220K	240K	260K	280K	300K
Vgs (V)	Ids (A/μm)	Ids (A/μm)	Ids (A/μm)	Ids (A/μm)	Ids (A/μm)	Ids (A/μm)	Ids (A/μm)	Ids (A/μm)	Ids (A/μm)	Ids (A/μm)	Ids (A/μm)	Ids (A/μm)	Ids (A/μm)	Ids (A/μm)
-40	1.97551e-14	3.25531e-14	1.08318e-14	3.5833e-15	1.68067e-14	1.59773e-14	2.73252e-14	2.13341e-13	-1.51264e-13	2.69649e-14	3.63553e-13	2.76174e-13	7.63183e-14	2.19889e-14
-39	1.82178e-14	4.8274e-15	6.8413e-15	1.53185e-14	5.166e-15	-6.3686e-15	7.888e-15	-1.78184e-13	2.87068e-13	2.34268e-14	7.1295e-14	-1.17008e-13	1.9904e-13	2.062e-15
-38	7.0362e-15	3.55317e-14	-1.847e-15	1.12296e-14	7.1276e-15	-9.3998e-15	1.27437e-14	3.15406e-14	2.29364e-13	1.83983e-14	-1.25794e-13	2.93494e-14	-1.1652e-13	1.7761e-14
-37	2.05884e-14	1.1961e-15	6.3435e-15	-1.0815e-15	1.47712e-14	-7.00791e-16	-4.863e-15	-1.84935e-13	-1.93836e-13	1.03062e-14	1.87305e-13	1.93213e-13	-2.44e-15	3.5683e-15
-36	-1.4837e-15	2.52489e-14	-1.42224e-14	5.4965e-15	3.7167e-15	-7.0439e-15	2.69642e-14	2.49808e-13	1.84206e-13	1.35862e-14	4.05916e-14	-1.26979e-13	2.35557e-13	6.138e-15
-35	1.49858e-14	-3.3191e-15	1.70777e-14	4.3597e-15	9.8279e-15	1.53808e-14	3.062e-15	-1.57665e-13	-1.93316e-13	-4.6875e-15	1.98852e-13	5.6424e-15	-1.71128e-13	3.54043e-16
-34	2.80635e-16	2.7909e-15	1.41283e-14	4.514e-15	6.4678e-15	-4.511e-15	7.3839e-15	3.05929e-13	2.14079e-13	6.3283e-15	-1.26664e-13	2.59086e-13	4.22854e-13	1.66294e-14
-33	1.08385e-14	8.1403e-15	1.0465e-14	6.3557e-15	1.44581e-14	1.62282e-14	-1.551e-15	1.39188e-13	-1.39687e-13	2.56072e-16	2.56605e-13	-1.1023e-13	5.8375e-13	2.36025e-14
-32	7.6699e-15	-1.46854e-14	1.97423e-14	1.08124e-14	2.24694e-14	8.3481e-15	6.381e-15	5.83904e-13	3.2555e-13	4.44593e-14	3.53799e-13	6.4576e-13	2.0823e-12	1.10018e-13
-31	8.1715e-15	7.5942e-15	3.3301e-15	2.81917e-16	5.3883e-15	3.19097e-14	7.1168e-14	2.38e-12	6.90097e-13	1.26892e-13	9.7066e-13	2.1083e-12	5.3204e-12	4.12207e-13
-30	5.5839e-15	1.4701e-14	1.42872e-14	8.5945e-15	3.23178e-14	6.6759e-14	2.38975e-13	5.7879e-12	1.9964e-12	4.0881e-13	2.805e-12	4.841e-12	1.34786e-11	1.4416e-12
-29	3.03926e-14	2.26873e-14	2.69905e-14	5.26022e-14	1.0249e-13	2.15609e-13	7.53719e-13	1.45818e-11	5.1958e-12	1.3986e-12	7.4494e-12	1.24844e-11	3.43821e-11	4.1135e-12
-28	5.77277e-14	6.07734e-14	8.88016e-14	1.33847e-13	3.0131e-13	6.04107e-13	2.0529e-12	3.30482e-11	1.3748e-11	3.6769e-12	1.77126e-11	3.05249e-11	6.62092e-11	9.592e-12
-27	1.86731e-13	1.37332e-13	2.2497e-13	3.48656e-13	8.33784e-13	1.5971e-12	4.8974e-12	7.05224e-11	3.03765e-11	8.6298e-12	4.15471e-11	7.17581e-11	1.50407e-10	2.24606e-11
-26	5.0718e-13	3.68209e-13	5.92402e-13	9.71947e-13	2.0775e-12	3.8528e-12	1.15594e-11	1.34799e-10	6.37539e-11	2.0395e-11	9.09687e-11	1.46033e-10	2.85655e-10	4.68384e-11
-25	1.1941e-12	9.05773e-13	1.5784e-12	2.3575e-12	4.7583e-12	8.9081e-12	2.57836e-11	2.31944e-10	1.21845e-10	4.38119e-11	1.89384e-10	2.63042e-10	4.84024e-10	9.20065e-11
-24	2.7136e-12	2.1849e-12	3.8432e-12	5.101e-12	1.09871e-11	1.89998e-11	5.08434e-11	4.16994e-10	2.45233e-10	8.57281e-11	3.46395e-10	4.86402e-10	8.63224e-10	1.67485e-10
-23	5.2711e-12	4.6431e-12	7.4595e-12	1.09647e-11	2.05725e-11	3.44871e-11	9.1756e-11	6.6296e-10	4.37623e-10	1.51978e-10	6.10426e-10	9.90633e-10	1.3145e-09	2.92976e-10
-22	1.05933e-11	8.0766e-12	1.48467e-11	1.97224e-11	3.8873e-11	6.22511e-11	1.58825e-10	1.0465e-09	6.80334e-10	2.53155e-10	8.68839e-10	1.3128e-09	2.0947e-09	4.61548e-10
-21	1.97203e-11	1.48529e-11	2.69185e-11	3.68936e-11	6.81602e-11	1.06699e-10	2.56927e-10	1.5066e-09	1.1439e-09	4.06515e-10	1.4935e-09	2.0479e-09	3.345e-09	7.24134e-10
-20	3.61782e-11	2.759e-11	4.75792e-11	6.20665e-11	1.18106e-10	1.83673e-10	4.2227e-10	2.3131e-09	1.8439e-09	6.36456e-10	2.3126e-09	3.1328e-09	4.615e-09	1.1025e-09
-19	6.37558e-11	4.7012e-11	7.97739e-11	1.07862e-10	2.02341e-10	2.98707e-10	6.66659e-10	3.436e-09	2.8433e-09	9.69481e-10	3.4914e-09	4.6472e-09	6.8626e-09	1.669e-09
-18	1.06031e-10	8.07707e-11	1.4204e-10	1.81584e-10	3.18278e-10	4.78703e-10	1.0337e-09	5.0694e-09	4.1008e-09	1.4676e-09	5.1654e-09	6.9025e-09	1.03803e-08	2.5154e-09
-17	1.68036e-10	1.39668e-10	2.25538e-10	2.91265e-10	5.0258e-10	7.44862e-10	1.5345e-09	7.4325e-09	6.7054e-09	2.192e-09	7.5873e-09	1.00193e-08	1.40814e-08	3.6464e-09
-16	2.62333e-10	2.21937e-10	3.6307e-10	4.57737e-10	7.64602e-10	1.1474e-09	2.2972e-09	1.04937e-08	8.8405e-09	3.258e-09	1.10466e-08	1.45581e-08	2.03198e-08	5.3523e-09
-15	4.08161e-10	3.39353e-10	5.50359e-10	6.90165e-10	1.1337e-09	1.7204e-09	3.3408e-09	1.43828e-08	1.2637e-08	4.7058e-09	1.59383e-08	2.06839e-08	2.90016e-08	7.5277e-09
-14	6.26687e-10	5.44555e-10	8.48891e-10	1.0413e-09	1.6836e-09	2.5699e-09	4.8003e-09	2.02022e-08	1.79869e-08	6.7278e-09	2.2232e-08	2.87811e-08	3.77509e-08	1.06423e-08
-13	9.50575e-10	8.24468e-10	1.3011e-09	1.5977e-09	2.4989e-09	3.7715e-09	6.8186e-09	2.74021e-08	2.48249e-08	9.4508e-09	3.01399e-08	3.85152e-08	5.03024e-08	1.4677e-08
-12	1.4214e-09	1.236e-09	1.9386e-09	2.3691e-09	3.6931e-09	5.4864e-09	9.5382e-09	3.62954e-08	3.38568e-08	1.31998e-08	3.95024e-08	4.91821e-08	6.53567e-08	2.00411e-08
-11	2.0678e-09	1.8642e-09	2.876e-09	3.4732e-09	5.3249e-09	7.7479e-09	1.30966e-08	4.71113e-08	4.50885e-08	1.77883e-08	5.18305e-08	6.31418e-08	8.26742e-08	2.67639e-08
-10	2.9788e-09	2.7021e-09	4.1599e-09	4.999e-09	7.5447e-09	1.07168e-08	1.77692e-08	6.09933e-08	5.66975e-08	2.38443e-08	6.59888e-08	7.9251e-08	1.04437e-07	3.5233e-08
-9	4.1637e-09	3.8136e-09	5.9174e-09	6.9931e-09	1.02947e-08	1.46664e-08	2.36868e-08	7.69845e-08	7.2251e-08	3.13169e-08	8.38263e-08	9.96857e-08	1.28821e-07	4.53039e-08
-8	5.7993e-09	5.3347e-09	8.2794e-09	9.6924e-09	1.39666e-08	1.96626e-08	3.09397e-08	9.27992e-08	8.94123e-08	4.07552e-08	1.04778e-07	1.22788e-07	1.56275e-07	5.79311e-08
-7	7.9125e-09	7.3391e-09	1.12107e-08	1.30249e-08	1.87173e-08	2.59563e-08	4.00376e-08	1.1441e-07	1.10919e-07	5.19145e-08	1.2513e-07	1.49055e-07	1.87008e-07	7.23658e-08
-6	1.05711e-08	1.00087e-08	1.51746e-08	1.74904e-08	2.48164e-08	3.37227e-08	5.11678e-08	1.38822e-07	1.34993e-07	6.54716e-08	1.50839e-07	1.77986e-07	2.10597e-07	8.98863e-08
-5	1.40261e-08	1.33889e-08	2.0066e-08	2.2931e-08	3.21808e-08	4.32023e-08	6.42727e-08	1.63074e-07	1.6074e-07	8.13817e-08	1.78893e-07	2.10587e-07	2.47222e-07	1.10306e-07
-4	1.84598e-08	1.76223e-08	2.62884e-08	2.99573e-08	4.13273e-08	5.48958e-08	8.00718e-08	1.93506e-07	1.92249e-07	1.00334e-07	2.12147e-07	2.46293e-07	2.88562e-07	1.33674e-07
-3	2.41535e-08	2.28942e-08	3.38536e-08	3.84067e-08	5.22771e-08	6.85283e-08	9.85919e-08	2.26847e-07	2.24839e-07	1.22051e-07	2.48301e-07	2.86161e-07	3.32648e-07	1.6044e-07
-2	3.09759e-08	2.95476e-08	4.32047e-08	4.87484e-08	6.56038e-08	8.48128e-08	1.20581e-07	2.64616e-07	2.59759e-07	1.47351e-07	2.85574e-07	3.28424e-07	3.80908e-07	1.91284e-07
-1	3.95789e-08	3.7921e-08	5.48753e-08	6.11431e-08	8.13609e-08	1.04087e-07	1.45034e-07	3.03146e-07	3.00279e-07	1.76054e-07	3.30378e-07	3.74541e-07	4.31186e-07	2.24798e-07
0	5.02467e-08	4.83294e-08	6.85667e-08	7.64667e-08	9.99156e-08	1.26863e-07	1.73884e-07	3.46034e-07	3.44896e-07	2.08995e-07	3.75407e-07	4.23722e-07	4.8434e-07	2.63518e-07
1	6.33863e-08	6.09583e-08	8.56009e-08	9.39013e-08	1.21578e-07	1.52435e-07	2.05727e-07	3.9264e-07	3.93808e-07	2.4481e-07	4.25606e-07	4.76415e-07	5.28632e-07	3.04894e-07
2	7.93589e-08	7.61657e-08	1.05378e-07	1.14922e-07	1.46796e-07	1.82045e-07	2.42101e-07	4.44283e-07	4.42216e-07	2.85671e-07	4.79456e-07	5.32626e-07	5.89908e-07	3.5149e-07
3	9.78674e-08	9.43718e-08	1.28074e-07	1.39209e-07	1.7471e-07	2.15312e-07	2.81941e-07	4.98576e-07	4.98334e-07	3.2974e-07	5.336e-07	5.92344e-07	6.45997e-07	4.01132e-07
4	1.19037e-07	1.14927e-07	1.54354e-07	1.66335e-07	2.07427e-07	2.52629e-07	3.26507e-07	5.5632e-07	5.56353e-07	3.78778e-07	5.97868e-07	6.55045e-07	7.12941e-07	4.56457e-07
5	1.43688e-07	1.38033e-07	1.83271e-07	1.96861e-07	2.43204e-07	2.93556e-07	3.74051e-07	6.1887e-07	6.20131e-07	4.30785e-07	6.61118e-07	7.22854e-07	7.7349e-07	5.13924e-07
6	1.70579e-07	1.6491e-07	2.1605e-07	2.31065e-07	2.82563e-07	3.38257e-07	4.26327e-07	6.74436e-07	6.82533e-07	4.88213e-07	7.30168e-07	7.92685e-07	8.43675e-07	5.77684e-07
7	2.01536e-07	1.93777e-07	2.52333e-07	2.68539e-07	3.25056e-07	3.8621e-07	4.80821e-07	7.48709e-07	7.47583e-07	5.49137e-07	8.00903e-07	8.66676e-07	9.21962e-07	6.43461e-07
8	2.34793e-07	2.26683e-07	2.92264e-07	3.10004e-07	3.71942e-07	4.39427e-07	5.41021e-07	8.11761e-07	8.21521e-07	6.15143e-07	8.78938e-07	9.42845e-07	9.93701e-07	7.15615e-07
9	2.71852e-07	2.6177e-07	3.35814e-07	3.54515e-07	4.22235e-07	4.94627e-07	6.03721e-07	8.924e-07	8.97322e-07	6.83658e-07	9.58641e-07	1.0245e-06	1.0763e-06	7.88492e-07
10	3.11977e-07	3.01729e-07	3.8264e-07	4.02531e-07	4.7653e-07	5.55104e-07	6.71595e-07	9.66774e-07	9.78821e-07	7.56529e-07	1.0314e-06	1.107e-06	1.165e-06	8.67663e-07
11	3.56842e-07	3.43892e-07	4.339e-07	4.53957e-07	5.35146e-07	6.19827e-07	7.42094e-07	1.0458e-06	1.0624e-06	8.32609e-07	1.1166e-06	1.1949e-06	1.2575e-06	9.50353e-07
12	4.03707e-07	3.90221e-07	4.88473e-07	5.11533e-07	5.97846e-07	6.88675e-07	8.19629e-07	1.1287e-06	1.149e-06	9.16098e-07	1.2035e-06	1.2849e-06	1.3519e-06	1.0385e-06
13	4.55617e-07	4.41423e-07	5.4674e-07	5.70668e-07	6.6372e-07	7.60161e-07	8.98826e-07	1.218e-06	1.2381e-06	1.0006e-06	1.2997e-06	1.3776e-06	1.498e-06	1.1291e-06
14	5.10574e-07	4.95853e-07	6.08981e-07	6.36285e-07	7.33616e-07	8.37214e-07	9.83809e-07	1.3065e-06	1.3336e-06	1.0893e-06	1.3953e-06	1.4675e-06	1.5319e-06	1.2253e-06
15	5.69874e-07	5.52016e-07	6.76752e-07	7.02877e-07	8.08454e-07	9.16584e-07	1.0713e-06	1.4091e-06	1.4313e-06	1.1837e-06	1.4947e-06	1.5625e-06	1.6342e-06	1.3245e-06
16	6.32881e-07	6.15546e-07	7.48547e-07	7.76361e-07	8.8906e-07	1.0025e-06	1.1644e-06	1.5051e-06	1.5229e-06	1.2823e-06	1.5966e-06	1.6673e-06	1.74e-06	1.4301e-06
17	7.00253e-07	6.78867e-07	8.23591e-07	8.52442e-07	9.71958e-07	1.0916e-06	1.2607e-06	1.5891e-06	1.6323e-06	1.3838e-06	1.7028e-06	1.7774e-06	1.8464e-06	1.5357e-06
18	7.7078e-07	7.47771e-07	9.04496e-07	9.33219e-07	1.0601e-06	1.1861e-06	1.3637e-06	1.7021e-06	1.7401e-06	1.4911e-06	1.8088e-06	1.8795e-06	1.9572e-06	1.6482e-06
19	8.47092e-07	8.21649e-07	9.8851e-07	1.0194e-06	1.1511e-06	1.2841e-06	1.4667e-06	1.8052e-06	1.8448e-06	1.6012e-06	1.9239e-06	1.9898e-06	2.0706e-06	1.7657e-06
20	9.25208e-07	9.00659e-07	1.0773e-06	1.1098e-06	1.2493e-06	1.388e-06	1.5787e-06	1.9185e-06	1.9571e-06	1.7177e-06	2.0347e-06	2.0998e-06	2.1293e-06	1.8864e-06
21	1.0125e-06	9.80652e-07	1.1705e-06	1.2019e-06	1.3493e-06	1.495e-06	1.6925e-06	2.0342e-06	2.0695e-06	1.8374e-06	2.1532e-06	2.22e-06	2.2657e-06	2.0099e-06
22	1.098e-06	1.0698e-06	1.2702e-06	1.3018e-06	1.4555e-06	1.6064e-06	1.8114e-06	2.149e-06	2.1929e-06	1.9623e-06	2.2782e-06	2.3446e-06	2.4167e-06	2.141e-06
23	1.1943e-06	1.1584e-06	1.3726e-06	1.4051e-06	1.5641e-06	1.7216e-06	1.9347e-06	2.2717e-06	2.3183e-06	2.091e-06	2.3976e-06	2.4633e-06	2.5175e-06	2.2721e-06
24	1.2904e-06	1.2569e-06	1.4816e-06	1.515e-06	1.6786e-06	1.8413e-06	2.0645e-06	2.3922e-06	2.4436e-06	2.2249e-06	2.523e-06	2.59e-06	2.6602e-06	2.4124e-06
25	1.397e-06	1.3572e-06	1.5958e-06	1.6281e-06	1.7969e-06	1.9662e-06	2.1944e-06	2.5226e-06	2.5793e-06	2.359e-06	2.656e-06	2.7246e-06	2.792e-06	2.5519e-06
26	1.5061e-06	1.4642e-06	1.7153e-06	1.7455e-06	1.92e-06	2.0962e-06	2.335e-06	2.6528e-06	2.7115e-06	2.5026e-06	2.7876e-06	2.8486e-06	2.929e-06	2.698e-06
27	1.6203e-06	1.5752e-06	1.8367e-06	1.8685e-06	2.0479e-06	2.2303e-06	2.4762e-06	2.77e-06	2.8462e-06	2.6457e-06	2.9217e-06	2.9887e-06	3.0738e-06	2.8499e-06
28	1.7379e-06	1.6956e-06	1.9657e-06	1.9976e-06	2.1821e-06	2.3714e-06	2.6197e-06	2.907e-06	2.9916e-06	2.7987e-06	3.0696e-06	3.1292e-06	3.2023e-06	3.0072e-06
29	1.8654e-06	1.8155e-06	2.0998e-06	2.1306e-06	2.3201e-06	2.5108e-06	2.7714e-06	3.0473e-06	3.1317e-06	2.9539e-06	3.2178e-06	3.2749e-06	3.3462e-06	3.1669e-06
30	1.9925e-06	1.9479e-06	2.2392e-06	2.2694e-06	2.4659e-06	2.6642e-06	2.9256e-06	3.1847e-06	3.2694e-06	3.1124e-06	3.3679e-06	3.4157e-06	3.4943e-06	3.3334e-06
31	2.129e-06	2.0787e-06	2.3821e-06	2.4112e-06	2.6116e-06	2.8119e-06	3.0819e-06	3.3283e-06	3.4149e-06	3.276e-06	3.5201e-06	3.5619e-06	3.6296e-06	3.4963e-06
32	2.2688e-06	2.2175e-06	2.5295e-06	2.5587e-06	2.7694e-06	2.9723e-06	3.2492e-06	3.4774e-06	3.5647e-06	3.444e-06	3.6626e-06	3.7225e-06	3.7843e-06	3.672e-06
33	2.4161e-06	2.3603e-06	2.6836e-06	2.7128e-06	2.9214e-06	3.1335e-06	3.417e-06	3.6225e-06	3.7233e-06	3.6125e-06	3.8164e-06	3.8755e-06	3.9453e-06	3.8459e-06
34	2.5628e-06	2.5157e-06	2.8428e-06	2.8728e-06	3.0845e-06	3.3022e-06	3.5953e-06	3.7776e-06	3.8773e-06	3.7892e-06	3.9787e-06	4.0401e-06	4.091e-06	4.0282e-06
35	2.7191e-06	2.6665e-06	3.0118e-06	3.0311e-06	3.2504e-06	3.4725e-06	3.7661e-06	3.9326e-06	4.0448e-06	3.9716e-06	4.1421e-06	4.2036e-06	4.2534e-06	4.2148e-06
36	2.8812e-06	2.8224e-06	3.1789e-06	3.2035e-06	3.4229e-06	3.656e-06	3.953e-06	4.0888e-06	4.2054e-06	4.1567e-06	4.3085e-06	4.3664e-06	4.4086e-06	4.4047e-06
37	3.0459e-06	2.9902e-06	3.357e-06	3.3732e-06	3.6043e-06	3.8351e-06	4.1384e-06	4.2541e-06	4.3713e-06	4.3451e-06	4.483e-06	4.5119e-06	4.574e-06	4.5953e-06
38	3.2176e-06	3.1643e-06	3.5361e-06	3.557e-06	3.7858e-06	4.0243e-06	4.3353e-06	4.4241e-06	4.5348e-06	4.5408e-06	4.6468e-06	4.6855e-06	4.7369e-06	4.7901e-06
39	3.3963e-06	3.3471e-06	3.7249e-06	3.7404e-06	3.9747e-06	4.2156e-06	4.5294e-06	4.5993e-06	4.7143e-06	4.7383e-06	4.8072e-06	4.8572e-06	4.9009e-06	4.9925e-06
40	3.5799e-06	3.5279e-06	3.9144e-06	3.9311e-06	4.1692e-06	4.4143e-06	4.7319e-06	4.7632e-06	4.8934e-06	4.9421e-06	4.9783e-06	5.0255e-06	5.0731e-06	5.1955e-06

## Sheet: F4b-f
F4b	X	Y	X	Y	X	Y	X	Y	X	Y	X	Y	X	Y	X	Y	X	Y	X	Y	X	Y	X	Y	X	Y	X	Y
	44.6327	-29.7899	44.6327	-27.535	44.6327	-25.6969	44.6327	-24.4157	44.6327	-23.554	44.6327	-22.8815	44.6327	-22.4134	44.6327	-22.0038	44.6327	-21.6654	44.6327	-21.4007	44.6327	-21.1298	44.6327	-20.9054	44.6327	-20.7088	44.6327	-20.5326
	46.418	-30.3409	46.418	-27.8635	46.418	-25.9761	46.418	-24.6328	46.418	-23.6556	46.418	-22.9564	46.418	-22.4222	46.418	-21.9961	46.418	-21.6514	46.418	-21.3559	46.418	-21.0954	46.418	-20.8693	46.418	-20.6618	46.418	-20.4832
	48.3521	-30.6082	48.3521	-28.1059	48.3521	-26.1755	48.3521	-24.7547	48.3521	-23.7574	48.3521	-23.0162	48.3521	-22.4503	48.3521	-22.0055	48.3521	-21.6345	48.3521	-21.3261	48.3521	-21.0597	48.3521	-20.8222	48.3521	-20.6153	48.3521	-20.4314
	52.7477	-30.9187	52.7477	-28.2018	52.7477	-26.2771	52.7477	-24.776	52.7477	-23.7339	52.7477	-22.9705	52.7477	-22.3838	52.7477	-21.9274	52.7477	-21.5474	52.7477	-21.2345	52.7477	-20.9584	52.7477	-20.7214	52.7477	-20.5085	52.7477	-20.3181
	58.0225	-30.132	58.0225	-27.8321	58.0225	-26.0047	58.0225	-24.56	58.0225	-23.5765	58.0225	-22.8242	58.0225	-22.2429	58.0225	-21.7968	58.0225	-21.42	58.0225	-21.1114	58.0225	-20.8377	58.0225	-20.6046	58.0225	-20.3937	58.0225	-20.2021
	64.4694	-30.4418	64.4694	-28.1086	64.4694	-26.2362	64.4694	-24.7414	64.4694	-23.6443	64.4694	-22.8112	64.4694	-22.1677	64.4694	-21.6636	64.4694	-21.2561	64.4694	-20.915	64.4694	-20.6204	64.4694	-20.3619	64.4694	-20.1338	64.4694	-19.9306
	72.5281	-30.7219	72.5281	-28.2385	72.5281	-26.3174	72.5281	-24.774	72.5281	-23.6328	72.5281	-22.7619	72.5281	-22.0939	72.5281	-21.5702	72.5281	-21.1472	72.5281	-20.7936	72.5281	-20.4914	72.5281	-20.2243	72.5281	-19.9897	72.5281	-19.7805
	77.3633	-31.3671	77.3633	-28.6911	77.3633	-26.6904	77.3633	-25.0677	77.3633	-23.8401	77.3633	-22.8969	77.3633	-22.1736	77.3633	-21.6105	77.3633	-21.1628	77.3633	-20.7905	77.3633	-20.4732	77.3633	-20.1961	77.3633	-19.9523	77.3633	-19.7337
	89.2654	-31.6826	89.2654	-28.8867	89.2654	-26.8184	89.2654	-25.1471	89.2654	-23.8614	89.2654	-22.8662	89.2654	-22.1002	89.2654	-21.5149	89.2654	-21.0479	89.2654	-20.6602	89.2654	-20.3309	89.2654	-20.0433	89.2654	-19.7908	89.2654	-19.5625
	105.495	-32.4948	105.495	-29.4686	105.495	-27.2314	105.495	-25.4022	105.495	-24.0081	105.495	-22.9309	105.495	-22.0919	105.495	-21.4548	105.495	-20.9533	105.495	-20.5384	105.495	-20.1901	105.495	-19.8863	105.495	-19.6214	105.495	-19.3814
	128.939	-32.8209	128.939	-29.6091	128.939	-27.3475	128.939	-25.4521	128.939	-24.0016	128.939	-22.8686	128.939	-21.9791	128.939	-21.3065	128.939	-20.7779	128.939	-20.3426	128.939	-19.9792	128.939	-19.6627	128.939	-19.3864	128.939	-19.1375
	165.779	-33.1462	165.779	-29.8756	165.779	-27.4668	165.779	-25.4868	165.779	-23.9635	165.779	-22.7592	165.779	-21.8135	165.779	-21.0982	165.779	-20.5408	165.779	-20.0841	165.779	-19.7008	165.779	-19.3687	165.779	-19.0793	165.779	-18.8193
F4c	X (V)	Y (eV)		F4d	X (K)	Y (cm2V-1s-1)	F4e	Vgs (V)	Ids (A/um)		F4f	Vgs (V)	Ids (A/um)
	-25	0.02775			90	75.9222		-60	1.82e-12			-60	1.6046e-11
	-22	0.02208			110	75.9782		-59.4	1.94e-12			-59.4	1.2711e-11
	-20	0.01943			130	77.24		-58.8	2.76e-12			-58.8	1.0384e-11
	-17	0.01608			150	77.8283		-58.2	4.12e-12			-58.2	9.009e-12
	-15	0.01457			160	77.6224		-57.6	6.27e-12			-57.6	7.997e-12
	-12	0.0113			180	79.1519		-57	9.36e-12			-57	7.3e-12
	-10	0.00891			200	75.6515		-56.4	1.53e-11			-56.4	7.204e-12
	-7	0.00575			220	68.4454		-55.8	2.42e-11			-55.8	5.937e-12
	-5	0.00356			240	65.3864		-55.2	3.69e-11			-55.2	5.457e-12
	-2	0.000741			250	64.2392		-54.6	5.51e-11			-54.6	4.748e-12
	0	-0.00104						-54	8.49e-11			-54	4.036e-12
	2	-0.00272						-53.4	1.28e-10			-53.4	3.626e-12
	5	-0.00488						-52.8	1.91e-10			-52.8	3.459e-12
	7	-0.00607						-52.2	2.71e-10			-52.2	2.945e-12
	10	-0.00753						-51.6	3.84e-10			-51.6	2.768e-12
	12	-0.00835						-51	5.41e-10			-51	2.422e-12
	15	-0.0094						-50.4	7.58e-10			-50.4	2.22e-12
	17	-0.01003						-49.8	1.02e-09			-49.8	2.103e-12
	20	-0.01093						-49.2	1.39e-09			-49.2	1.864e-12
	22	-0.01164						-48.6	1.88e-09			-48.6	1.679e-12
	25	-0.012						-48	2.53e-09			-48	1.724e-12
	27	-0.0124						-47.4	3.34e-09			-47.4	1.8e-12
	30	-0.01295						-46.8	4.33e-09			-46.8	1.716e-12
	32	-0.01329						-46.2	5.7e-09			-46.2	1.743e-12
	35	-0.01373						-45.6	7.23e-09			-45.6	1.867e-12
	37	-0.01403						-45	9.3e-09			-45	2.051e-12
	40	-0.01446						-44.4	1.21e-08			-44.4	2.085e-12
								-43.8	1.5e-08			-43.8	2.456e-12
								-43.2	1.89e-08			-43.2	3.069e-12
								-42.6	2.32e-08			-42.6	3.973e-12
								-42	2.83e-08			-42	5.626e-12
								-41.4	3.4e-08			-41.4	7.416e-12
								-40.8	4.21e-08			-40.8	9.815e-12
								-40.2	5.05e-08			-40.2	1.2869e-11
								-39.6	6.04e-08			-39.6	1.7367e-11
								-39	7.23e-08			-39	2.099e-11
								-38.4	8.5e-08			-38.4	2.9977e-11
								-37.8	9.95e-08			-37.8	3.5794e-11
								-37.2	1.15e-07			-37.2	4.6879e-11
								-36.6	1.34e-07			-36.6	6.2078e-11
								-36	1.53e-07			-36	7.9937e-11
								-35.4	1.75e-07			-35.4	9.589e-11
								-34.8	2e-07			-34.8	1.23398e-10
								-34.2	2.27e-07			-34.2	1.66728e-10
								-33.6	2.55e-07			-33.6	1.90338e-10
								-33	2.87e-07			-33	2.38101e-10
								-32.4	3.21e-07			-32.4	3.21975e-10
								-31.8	3.56e-07			-31.8	3.83788e-10
								-31.2	3.97e-07			-31.2	4.56592e-10
								-30.6	4.39e-07			-30.6	5.83324e-10
								-30	4.81e-07			-30	7.23564e-10
								-29.4	5.28e-07			-29.4	8.57347e-10
								-28.8	5.77e-07			-28.8	1.02079e-09
								-28.2	6.27e-07			-28.2	1.28318e-09
								-27.6	6.83e-07			-27.6	1.60772e-09
								-27	7.38e-07			-27	1.89941e-09
								-26.4	7.99e-07			-26.4	2.35507e-09
								-25.8	8.62e-07			-25.8	2.77542e-09
								-25.2	9.25e-07			-25.2	3.33335e-09
								-24.6	9.93e-07			-24.6	4.09057e-09
								-24	1.06e-06			-24	4.79144e-09
								-23.4	1.14e-06			-23.4	5.71655e-09
								-22.8	1.21e-06			-22.8	6.75665e-09
								-22.2	1.29e-06			-22.2	7.95328e-09
								-21.6	1.37e-06			-21.6	9.41523e-09
								-21	1.46e-06			-21	1.09841e-08
								-20.4	1.54e-06			-20.4	1.192e-08
								-19.8	1.63e-06			-19.8	1.41045e-08
								-19.2	1.72e-06			-19.2	1.64966e-08
								-18.6	1.82e-06			-18.6	1.8986e-08
								-18	1.91e-06			-18	2.14478e-08
								-17.4	2.01e-06			-17.4	2.48642e-08
								-16.8	2.12e-06			-16.8	2.88056e-08
								-16.2	2.22e-06			-16.2	3.21745e-08
								-15.6	2.33e-06			-15.6	3.63736e-08
								-15	2.45e-06			-15	4.16016e-08
								-14.4	2.56e-06			-14.4	4.62244e-08
								-13.8	2.68e-06			-13.8	5.164e-08
								-13.2	2.8e-06			-13.2	5.82634e-08
								-12.6	2.92e-06			-12.6	6.42967e-08
								-12	3.05e-06			-12	7.05074e-08
								-11.4	3.18e-06			-11.4	7.77008e-08
								-10.8	3.31e-06			-10.8	8.713e-08
								-10.2	3.45e-06			-10.2	9.69257e-08
								-9.6	3.59e-06			-9.6	1.07105e-07
								-9	3.73e-06			-9	1.17855e-07
								-8.4	3.87e-06			-8.4	1.28172e-07
								-7.8	4.02e-06			-7.8	1.40258e-07
								-7.2	4.16e-06			-7.2	1.54181e-07
								-6.6	4.31e-06			-6.6	1.67001e-07
								-6	4.47e-06			-6	1.82125e-07
								-5.4	4.63e-06			-5.4	1.99303e-07
								-4.8	4.79e-06			-4.8	2.1521e-07
								-4.2	4.95e-06			-4.2	2.33513e-07
								-3.6	5.12e-06			-3.6	2.50879e-07
								-3	5.29e-06			-3	2.70667e-07
								-2.4	5.46e-06			-2.4	2.91337e-07
								-1.8	5.63e-06			-1.8	3.11099e-07
								-1.2	5.81e-06			-1.2	3.3376e-07
								-0.6	5.99e-06			-0.6	3.57017e-07
								0	6.17e-06			0	3.80803e-07
								0.6	6.36e-06			0.6	4.05312e-07
								1.2	6.54e-06			1.2	4.2927e-07
								1.8	6.73e-06			1.8	4.54274e-07
								2.4	6.93e-06			2.4	4.81733e-07
								3	7.12e-06			3	5.08444e-07
								3.6	7.32e-06			3.6	5.40573e-07
								4.2	7.52e-06			4.2	5.68411e-07
								4.8	7.71e-06			4.8	6.03787e-07
								5.4	7.92e-06			5.4	6.33236e-07
								6	8.14e-06			6	6.66894e-07
								6.6	8.33e-06			6.6	6.95858e-07
								7.2	8.55e-06			7.2	7.37476e-07
								7.8	8.75e-06			7.8	7.70273e-07
								8.4	8.97e-06			8.4	8.02023e-07
								9	9.19e-06			9	8.40394e-07
								9.6	9.41e-06			9.6	8.77461e-07
								10.2	9.64e-06			10.2	9.14102e-07
								10.8	9.86e-06			10.8	9.48562e-07
								11.4	1.01e-05			11.4	9.91381e-07
								12	1.03e-05			12	1.02578e-06
								12.6	1.06e-05			12.6	1.06756e-06
								13.2	1.08e-05			13.2	1.10684e-06
								13.8	1.1e-05			13.8	1.14675e-06
								14.4	1.13e-05			14.4	1.18727e-06
								15	1.15e-05			15	1.22771e-06
								15.6	1.18e-05			15.6	1.26769e-06
								16.2	1.2e-05			16.2	1.31273e-06
								16.8	1.22e-05			16.8	1.35688e-06
								17.4	1.25e-05			17.4	1.4018e-06
								18	1.27e-05			18	1.44283e-06
								18.6	1.3e-05			18.6	1.49406e-06
								19.2	1.32e-05			19.2	1.53588e-06
								19.8	1.35e-05			19.8	1.58131e-06
								20.4	1.38e-05			20.4	1.63103e-06
								21	1.4e-05			21	1.67504e-06
								21.6	1.43e-05			21.6	1.72598e-06
								22.2	1.45e-05			22.2	1.76609e-06
								22.8	1.48e-05			22.8	1.81239e-06
								23.4	1.51e-05			23.4	1.8682e-06
								24	1.53e-05			24	1.91455e-06
								24.6	1.56e-05			24.6	1.96413e-06
								25.2	1.59e-05			25.2	2.01721e-06
								25.8	1.62e-05			25.8	2.06361e-06
								26.4	1.64e-05			26.4	2.11472e-06
								27	1.67e-05			27	2.16863e-06
								27.6	1.7e-05			27.6	2.21175e-06
								28.2	1.73e-05			28.2	2.26646e-06
								28.8	1.75e-05			28.8	2.3161e-06
								29.4	1.78e-05			29.4	2.37264e-06
								30	1.81e-05			30	2.43128e-06
								30.6	1.84e-05			30.6	2.47779e-06
								31.2	1.87e-05			31.2	2.5301e-06
								31.8	1.9e-05			31.8	2.58556e-06
								32.4	1.93e-05			32.4	2.6387e-06
								33	1.95e-05			33	2.69298e-06
								33.6	1.98e-05			33.6	2.74681e-06
								34.2	2.01e-05			34.2	2.80385e-06
								34.8	2.04e-05			34.8	2.86699e-06
								35.4	2.07e-05			35.4	2.92045e-06
								36	2.1e-05			36	2.98943e-06
								36.6	2.13e-05			36.6	3.03756e-06
								37.2	2.16e-05			37.2	3.09131e-06
								37.8	2.19e-05			37.8	3.15382e-06
								38.4	2.22e-05			38.4	3.2108e-06
								39	2.25e-05			39	3.26518e-06
								39.6	2.28e-05			39.6	3.32934e-06
								40.2	2.31e-05			40.2	3.38031e-06
								40.8	2.34e-05			40.8	3.43808e-06
								41.4	2.37e-05			41.4	3.48922e-06
								42	2.41e-05			42	3.55059e-06
								42.6	2.44e-05			42.6	3.60369e-06
								43.2	2.47e-05			43.2	3.66962e-06
								43.8	2.5e-05			43.8	3.72505e-06
								44.4	2.53e-05			44.4	3.78572e-06
								45	2.56e-05			45	3.8376e-06
								45.6	2.59e-05			45.6	3.90327e-06
								46.2	2.62e-05			46.2	3.9665e-06
								46.8	2.65e-05			46.8	4.01739e-06
								47.4	2.68e-05			47.4	4.07342e-06
								48	2.71e-05			48	4.14914e-06
								48.6	2.75e-05			48.6	4.21135e-06
								49.2	2.78e-05			49.2	4.2793e-06
								49.8	2.81e-05			49.8	4.33743e-06
								50.4	2.84e-05			50.4	4.39574e-06
								51	2.87e-05			51	4.45516e-06
								51.6	2.91e-05			51.6	4.51265e-06
								52.2	2.94e-05			52.2	4.58447e-06
								52.8	2.97e-05			52.8	4.64621e-06
								53.4	3e-05			53.4	4.71069e-06
								54	3.03e-05			54	4.78214e-06
								54.6	3.06e-05			54.6	4.85986e-06
								55.2	3.1e-05			55.2	4.91957e-06
								55.8	3.13e-05			55.8	4.96617e-06
								56.4	3.16e-05			56.4	5.03251e-06
								57	3.2e-05			57	5.09812e-06
								57.6	3.23e-05			57.6	5.14263e-06
								58.2	3.26e-05			58.2	5.22841e-06
								58.8	3.29e-05			58.8	5.29275e-06
								59.4	3.33e-05			59.4	5.35383e-06
								60	3.36e-05			60	5.42357e-06
								60	3.36e-05			60	5.41526e-06
								59.4	3.32e-05			59.4	5.31282e-06
								58.8	3.28e-05			58.8	5.22348e-06
								58.2	3.25e-05			58.2	5.13838e-06
								57.6	3.21e-05			57.6	5.05382e-06
								57	3.18e-05			57	4.96461e-06
								56.4	3.14e-05			56.4	4.88296e-06
								55.8	3.11e-05			55.8	4.79973e-06
								55.2	3.08e-05			55.2	4.71325e-06
								54.6	3.05e-05			54.6	4.63197e-06
								54	3.01e-05			54	4.54591e-06
								53.4	2.98e-05			53.4	4.47779e-06
								52.8	2.94e-05			52.8	4.39909e-06
								52.2	2.91e-05			52.2	4.31333e-06
								51.6	2.88e-05			51.6	4.24296e-06
								51	2.85e-05			51	4.16495e-06
								50.4	2.81e-05			50.4	4.09056e-06
								49.8	2.78e-05			49.8	4.0121e-06
								49.2	2.75e-05			49.2	3.9418e-06
								48.6	2.72e-05			48.6	3.87521e-06
								48	2.68e-05			48	3.81213e-06
								47.4	2.65e-05			47.4	3.7314e-06
								46.8	2.62e-05			46.8	3.6448e-06
								46.2	2.59e-05			46.2	3.56897e-06
								45.6	2.56e-05			45.6	3.49587e-06
								45	2.52e-05			45	3.42708e-06
								44.4	2.49e-05			44.4	3.35477e-06
								43.8	2.46e-05			43.8	3.27718e-06
								43.2	2.43e-05			43.2	3.20192e-06
								42.6	2.4e-05			42.6	3.13312e-06
								42	2.36e-05			42	3.05941e-06
								41.4	2.34e-05			41.4	2.98906e-06
								40.8	2.3e-05			40.8	2.92816e-06
								40.2	2.27e-05			40.2	2.8657e-06
								39.6	2.24e-05			39.6	2.79328e-06
								39	2.21e-05			39	2.72902e-06
								38.4	2.18e-05			38.4	2.66309e-06
								37.8	2.15e-05			37.8	2.58769e-06
								37.2	2.12e-05			37.2	2.51418e-06
								36.6	2.09e-05			36.6	2.44673e-06
								36	2.06e-05			36	2.38061e-06
								35.4	2.04e-05			35.4	2.32426e-06
								34.8	2.01e-05			34.8	2.25757e-06
								34.2	1.97e-05			34.2	2.19866e-06
								33.6	1.95e-05			33.6	2.13139e-06
								33	1.92e-05			33	2.0684e-06
								32.4	1.89e-05			32.4	2.01104e-06
								31.8	1.86e-05			31.8	1.94839e-06
								31.2	1.83e-05			31.2	1.88076e-06
								30.6	1.8e-05			30.6	1.81669e-06
								30	1.77e-05			30	1.76234e-06
								29.4	1.75e-05			29.4	1.70084e-06
								28.8	1.72e-05			28.8	1.64121e-06
								28.2	1.69e-05			28.2	1.58821e-06
								27.6	1.66e-05			27.6	1.52255e-06
								27	1.63e-05			27	1.4731e-06
								26.4	1.6e-05			26.4	1.41373e-06
								25.8	1.58e-05			25.8	1.35707e-06
								25.2	1.55e-05			25.2	1.29738e-06
								24.6	1.52e-05			24.6	1.25205e-06
								24	1.5e-05			24	1.1984e-06
								23.4	1.47e-05			23.4	1.14802e-06
								22.8	1.44e-05			22.8	1.09951e-06
								22.2	1.42e-05			22.2	1.04145e-06
								21.6	1.39e-05			21.6	9.94876e-07
								21	1.36e-05			21	9.47141e-07
								20.4	1.34e-05			20.4	8.98174e-07
								19.8	1.31e-05			19.8	8.56241e-07
								19.2	1.29e-05			19.2	8.11793e-07
								18.6	1.26e-05			18.6	7.69124e-07
								18	1.24e-05			18	7.27761e-07
								17.4	1.21e-05			17.4	6.82283e-07
								16.8	1.19e-05			16.8	6.42789e-07
								16.2	1.16e-05			16.2	6.11038e-07
								15.6	1.14e-05			15.6	5.74287e-07
								15	1.12e-05			15	5.3718e-07
								14.4	1.09e-05			14.4	5.03459e-07
								13.8	1.07e-05			13.8	4.71131e-07
								13.2	1.04e-05			13.2	4.338e-07
								12.6	1.02e-05			12.6	4.0715e-07
								12	9.98e-06			12	3.77353e-07
								11.4	9.76e-06			11.4	3.5609e-07
								10.8	9.53e-06			10.8	3.29069e-07
								10.2	9.3e-06			10.2	3.02773e-07
								9.6	9.08e-06			9.6	2.81598e-07
								9	8.86e-06			9	2.60161e-07
								8.4	8.65e-06			8.4	2.40667e-07
								7.8	8.44e-06			7.8	2.20897e-07
								7.2	8.22e-06			7.2	2.02481e-07
								6.6	8e-06			6.6	1.84421e-07
								6	7.8e-06			6	1.69532e-07
								5.4	7.59e-06			5.4	1.55419e-07
								4.8	7.39e-06			4.8	1.42832e-07
								4.2	7.19e-06			4.2	1.28822e-07
								3.6	6.99e-06			3.6	1.18005e-07
								3	6.78e-06			3	1.05929e-07
								2.4	6.6e-06			2.4	9.52461e-08
								1.8	6.41e-06			1.8	8.63816e-08
								1.2	6.22e-06			1.2	7.77363e-08
								0.6	6.03e-06			0.6	6.97966e-08
								0	5.85e-06			0	6.18392e-08
								-0.6	5.66e-06			-0.6	5.65758e-08
								-1.2	5.49e-06			-1.2	5.02127e-08
								-1.8	5.31e-06			-1.8	4.44413e-08
								-2.4	5.14e-06			-2.4	3.92322e-08
								-3	4.97e-06			-3	3.4751e-08
								-3.6	4.81e-06			-3.6	3.03301e-08
								-4.2	4.65e-06			-4.2	2.69808e-08
								-4.8	4.48e-06			-4.8	2.30567e-08
								-5.4	4.33e-06			-5.4	2.00751e-08
								-6	4.17e-06			-6	1.73094e-08
								-6.6	4.02e-06			-6.6	1.51785e-08
								-7.2	3.86e-06			-7.2	1.32232e-08
								-7.8	3.72e-06			-7.8	1.13594e-08
								-8.4	3.58e-06			-8.4	9.58042e-09
								-9	3.44e-06			-9	8.31864e-09
								-9.6	3.3e-06			-9.6	6.95276e-09
								-10.2	3.16e-06			-10.2	5.72444e-09
								-10.8	3.03e-06			-10.8	4.61528e-09
								-11.4	2.91e-06			-11.4	3.81239e-09
								-12	2.78e-06			-12	3.16749e-09
								-12.6	2.66e-06			-12.6	2.56656e-09
								-13.2	2.53e-06			-13.2	2.14114e-09
								-13.8	2.42e-06			-13.8	1.6972e-09
								-14.4	2.31e-06			-14.4	1.32795e-09
								-15	2.19e-06			-15	1.02758e-09
								-15.6	2.09e-06			-15.6	8.59207e-10
								-16.2	1.98e-06			-16.2	6.7783e-10
								-16.8	1.88e-06			-16.8	5.075e-10
								-17.4	1.78e-06			-17.4	4.1805e-10
								-18	1.69e-06			-18	3.4051e-10
								-18.6	1.59e-06			-18.6	2.48506e-10
								-19.2	1.5e-06			-19.2	1.74002e-10
								-19.8	1.41e-06			-19.8	1.44597e-10
								-20.4	1.33e-06			-20.4	1.17759e-10
								-21	1.25e-06			-21	8.1737e-11
								-21.6	1.17e-06			-21.6	5.6488e-11
								-22.2	1.1e-06			-22.2	4.4576e-11
								-22.8	1.03e-06			-22.8	3.2689e-11
								-23.4	9.56e-07			-23.4	2.5953e-11
								-24	8.89e-07			-24	3.062e-11
								-24.6	8.25e-07			-24.6	4.3535e-11
								-25.2	7.61e-07			-25.2	2.7966e-11
								-25.8	7.03e-07			-25.8	2.7014e-11
								-26.4	6.46e-07			-26.4	2.5671e-11
								-27	5.93e-07			-27	3.2381e-11
								-27.6	5.44e-07			-27.6	3.5275e-11
								-28.2	4.95e-07			-28.2	3.0103e-11
								-28.8	4.48e-07			-28.8	2.1991e-11
								-29.4	4.08e-07			-29.4	1.6528e-11
								-30	3.67e-07			-30	2.01e-11
								-30.6	3.3e-07			-30.6	3.8028e-11
								-31.2	2.97e-07			-31.2	3.6042e-11
								-31.8	2.65e-07			-31.8	1.5586e-11
								-32.4	2.35e-07			-32.4	1.3535e-11
								-33	2.08e-07			-33	1.1125e-11
								-33.6	1.83e-07			-33.6	9.567e-12
								-34.2	1.59e-07			-34.2	8.718e-12
								-34.8	1.39e-07			-34.8	7.844e-12
								-35.4	1.21e-07			-35.4	8.054e-12
								-36	1.04e-07			-36	7.727e-12
								-36.6	8.93e-08			-36.6	7.918e-12
								-37.2	7.66e-08			-37.2	7.394e-12
								-37.8	6.44e-08			-37.8	7.284e-12
								-38.4	5.34e-08			-38.4	7.506e-12
								-39	4.49e-08			-39	7.165e-12
								-39.6	3.72e-08			-39.6	7.231e-12
								-40.2	3.1e-08			-40.2	7.65e-12
								-40.8	2.55e-08			-40.8	7.572e-12
								-41.4	2.06e-08			-41.4	7.284e-12
								-42	1.65e-08			-42	7.115e-12
								-42.6	1.32e-08			-42.6	7.389e-12
								-43.2	1.05e-08			-43.2	7.549e-12
								-43.8	8.32e-09			-43.8	7.672e-12
								-44.4	6.55e-09			-44.4	7.683e-12
								-45	5.06e-09			-45	7.728e-12
								-45.6	3.9e-09			-45.6	8.066e-12
								-46.2	2.95e-09			-46.2	8.799e-12
								-46.8	2.22e-09			-46.8	1.0932e-11
								-47.4	1.67e-09			-47.4	1.2588e-11
								-48	1.28e-09			-48	1.3089e-11
								-48.6	9.61e-10			-48.6	1.1676e-11
								-49.2	6.97e-10			-49.2	1.1938e-11
								-49.8	4.99e-10			-49.8	1.1928e-11
								-50.4	3.64e-10			-50.4	1.1763e-11
								-51	2.5e-10			-51	1.1572e-11
								-51.6	1.8e-10			-51.6	1.148e-11
								-52.2	1.24e-10			-52.2	1.1646e-11
								-52.8	8.42e-11			-52.8	1.194e-11
								-53.4	5.54e-11			-53.4	1.2189e-11
								-54	3.97e-11			-54	1.2279e-11
								-54.6	2.51e-11			-54.6	1.2641e-11
								-55.2	1.7e-11			-55.2	1.3024e-11
								-55.8	1.2e-11			-55.8	1.328e-11
								-56.4	7.94e-12			-56.4	1.3821e-11
								-57	5.25e-12			-57	1.3906e-11
								-57.6	3.63e-12			-57.6	1.4159e-11
								-58.2	2.7e-12			-58.2	1.4632e-11
								-58.8	1.96e-12			-58.8	1.4927e-11
								-59.4	1.51e-12			-59.4	1.5305e-11
								-60	1.18e-12			-60	1.598e-11

## Sheet: F5c.d
F5c	X	Y		F5d	X	Y
	0	-1.58133e-05			0	-1.20068e-05
	0.0068	0.01111			0.0138	0.01177
	0.0136	0.02244			0.0273	0.02372
	0.0205	0.03358			0.041	0.03544
	0.0273	0.04488			0.0545	0.04803
	0.0341	0.05602			0.0683	0.06047
	0.0409	0.06732			0.0818	0.07292
	0.0477	0.07846			0.0955	0.0852
	0.0545	0.08976			0.109	0.09839
	0.0614	0.10105			0.1228	0.11146
	0.0682	0.11235			0.1363	0.12418
	0.075	0.12334			0.15	0.13726
	0.0818	0.13464			0.1638	0.1482
	0.0886	0.14578			0.1773	0.16062
	0.0955	0.15663			0.191	0.17334
	0.102	0.16867			0.2045	0.18583
	0.109	0.17922			0.2183	0.19897
	0.116	0.18976			0.2318	0.21125
	0.123	0.20181			0.2455	0.22521
	0.13	0.21235			0.259	0.23628
	0.136	0.2244			0.2728	0.24696
	0.143	0.23494			0.2863	0.26067
	0.15	0.24699			0.3	0.27291
	0.157	0.25753			0.3138	0.28538
	0.164	0.26958			0.3273	0.29542
	0.171	0.28012			0.341	0.30815
	0.177	0.29217			0.3545	0.31807
	0.184	0.30271			0.3683	0.32954
	0.191	0.31325			0.3818	0.34147
	0.198	0.3238			0.3955	0.34819
	0.205	0.33584			0.409	0.35526
	0.211	0.34639			0.4228	0.36426
	0.218	0.35843			0.4363	0.37959
	0.225	0.36898			0.45	0.38924
	0.232	0.37952			0.4638	0.39853
	0.239	0.39006			0.4773	0.40959
	0.246	0.4006			0.491	0.42242
	0.252	0.41114			0.5045	0.42779
	0.259	0.42169			0.5183	0.43607
	0.266	0.43223			0.5318	0.44306
	0.273	0.44277			0.5455	0.45105
	0.28	0.45482			0.559	0.46843
	0.286	0.46536			0.5728	0.47366
	0.293	0.4759			0.5863	0.4924
	0.3	0.48645			0.6	0.49689
	0.307	0.49548			0.6138	0.50765
	0.314	0.50602			0.6273	0.51813
	0.321	0.51506			0.641	0.52419
	0.327	0.5256			0.6545	0.52535
	0.334	0.53614			0.6683	0.53391
	0.341	0.54518			0.6818	0.54355
	0.348	0.55572			0.6955	0.55456
	0.355	0.56627			0.709	0.55918
	0.361	0.57681			0.7228	0.57704
	0.368	0.58434			0.7363	0.5861
	0.375	0.59488			0.75	0.58501
	0.382	0.60392			0.7638	0.59325
	0.389	0.61446			0.7773	0.60549
	0.396	0.62349			0.791	0.60583
	0.402	0.63404			0.8045	0.62772
	0.409	0.64157			0.8183	0.6353
	0.416	0.6506			0.8318	0.64048
	0.423	0.65663			0.8455	0.6481
	0.43	0.66416			0.859	0.64934
	0.436	0.67319			0.8728	0.64428
	0.443	0.68223			0.8863	0.66553
	0.45	0.69277			0.9	0.67719
	0.457	0.7003			0.9138	0.67802
	0.464	0.71084			0.9273	0.6804
	0.471	0.71837			0.941	0.68919
	0.477	0.7259			0.9545	0.68237
	0.484	0.73193			0.9683	0.69496
	0.491	0.73946			0.9818	0.69027
	0.498	0.74699			0.9955	0.70045
	0.505	0.75301			1.009	0.70724
	0.511	0.76054			1.0228	0.7221
	0.518	0.76807			1.0363	0.7232
	0.525	0.7741			1.05	0.7102
	0.532	0.78163			1.0638	0.70676
	0.539	0.78765			1.0773	0.7161
	0.546	0.79217			1.091	0.72839
	0.552	0.7997			1.1045	0.71992
	0.559	0.80572			1.1183	0.72916
	0.566	0.81325			1.1318	0.73062
	0.573	0.81928			1.1455	0.74253
	0.58	0.82681			1.159	0.75123
	0.586	0.83283			1.1728	0.74992
	0.593	0.83886			1.1863	0.75475
	0.6	0.84337			1.2	0.7573
	0.607	0.84789			1.2138	0.76821
	0.614	0.85392			1.2273	0.75916
	0.621	0.85994			1.241	0.77987
	0.627	0.86295			1.2545	0.76637
	0.634	0.86898			1.2683	0.77964
	0.641	0.87199			1.2818	0.76324
	0.648	0.87651			1.2955	0.79229
	0.655	0.88102			1.309	0.7799
	0.661	0.88554			1.3228	0.79696
	0.668	0.88855			1.3363	0.78183
	0.675	0.89307			1.35	0.78052
	0.682	0.8991			1.3638	0.79177
	0.689	0.90361			1.3773	0.79678
	0.696	0.90813			1.391	0.79425
	0.702	0.91114			1.4045	0.78799
	0.709	0.91566			1.4183	0.80845
	0.716	0.91867			1.4318	0.78664
	0.723	0.9247			1.4455	0.79995
	0.73	0.92922			1.459	0.79753
	0.736	0.93223			1.4728	0.7956
	0.743	0.93675			1.4863	0.80303
	0.75	0.93825			1.5	0.78663
	0.757	0.94277			1.5138	0.7984
	0.764	0.94428			1.5273	0.78976
	0.771	0.9488			1.541	0.80862
	0.777	0.9488			1.5545	0.81016
	0.784	0.95181			1.5683	0.81161
	0.791	0.95331			1.5818	0.8084
	0.798	0.95482			1.5955	0.82141
	0.805	0.95934			1.609	0.84032
	0.811	0.96084			1.6228	0.81881
	0.818	0.96235			1.6363	0.81937
	0.825	0.96687			1.65	0.80552
	0.832	0.96837			1.6638	0.84522
	0.839	0.9744			1.6773	0.825
	0.846	0.97139			1.691	0.86492
	0.852	0.97289			1.7045	0.85712
	0.859	0.9744			1.7183	0.86159
	0.866	0.9744			1.7318	0.83501
	0.873	0.97741			1.7455	0.80883
	0.88	0.97741			1.759	0.82351
	0.886	0.97741			1.7728	0.83129
	0.893	0.97892			1.7863	0.82892
	0.9	0.98042			1.8	0.82565
	0.907	0.97892			1.8138	0.81027
	0.914	0.98193			1.8273	0.83439
	0.921	0.98343			1.841	0.80003
	0.927	0.98343			1.8545	0.81211
	0.934	0.98343			1.8683	0.83383
	0.941	0.98494			1.8818	0.81838
	0.948	0.98645			1.8955	0.83133
	0.955	0.98795			1.909	0.87365
	0.961	0.98795			1.9228	0.87047
	0.968	0.98795			1.9363	0.87157
	0.975	0.98795			1.95	0.86647
	0.982	0.98795			1.9638	0.87681
	0.989	0.98946			1.9773	0.89083
	0.996	0.98795			1.991	0.88355
	1	0.98946			2.0045	0.90891
	1.01	0.98946			2.0183	0.9061
	1.02	0.98795			2.0318	0.93285
	1.02	0.99096			2.0455	0.89061
	1.03	0.98645			2.059	0.93671
	1.04	0.98795			2.0728	0.93958
	1.04	0.98795			2.0863	0.90882
	1.05	0.99096			2.1	0.95054
	1.06	0.99398			2.1138	0.95019
	1.06	0.99247			2.1273	0.93187
	1.07	0.99247			2.141	0.91496
	1.08	0.99548			2.1545	0.90014
	1.08	0.99548			2.1683	0.90025
	1.09	0.99548			2.1818	0.88441
	1.1	0.99548			2.1955	0.90496
	1.1	0.99548			2.209	0.91033
	1.11	0.99699			2.2228	0.93505
	1.12	0.99699			2.2363	0.96673
	1.13	0.99699			2.25	0.94996
	1.13	0.99548			2.2638	0.96031
	1.14	0.99849			2.2773	0.92701
	1.15	1			2.291	0.94636
					2.3045	0.94893
					2.3183	0.91745
					2.3318	0.93559
					2.3455	0.93376
					2.359	0.9383
					2.3728	0.91824
					2.3863	0.92444
					2.4	1.00354
					2.4138	0.96762
					2.4273	0.95754
					2.441	0.94811
					2.4545	0.9546
					2.4683	0.98314
					2.4818	0.98653
					2.4955	0.98952
					2.509	0.99528
					2.5228	1.00829
					2.5363	1.00521
					2.55	0.98337
					2.5638	0.99282
					2.5773	0.991
					2.591	1.01214
					2.6045	1.00818
					2.6183	1.03168
					2.6318	1.01383
					2.6455	1.03428
					2.659	1.02062
					2.6728	1.0146
					2.6863	0.9975
					2.7	0.95417
					2.7138	0.94908
					2.7273	0.97976
					2.741	0.99085
					2.7545	0.98475
					2.7683	0.99845
					2.7818	0.98304
					2.7955	0.94355
					2.809	0.93841
					2.8228	0.94151
					2.8363	0.94035
					2.85	0.94886
					2.8638	0.90535
					2.8773	0.96518
					2.891	0.99153
					2.9045	1.01731
					2.9183	0.9898
					2.9318	0.99521
					2.9455	1.02594
					2.959	0.99785
					2.9728	1.03982
					2.9863	1.04722
					3	1

## Sheet: F5e-h-evap
no. 1			no. 2			no. 3			no. 4			no. 5			no. 6			no. 6			no. 7			no. 8			no. 9			no. 10			no. 11			no. 12			no. 13			no. 14			no. 15			no. 16
vg (V)	Id (A/μm)	vd (V)	vg (V)	Id (A/μm)	vd (V)	vg (V)	Id (A/μm)	vd (V)	vg (V)	Id (A/μm)	vd (V)	vg (V)	Id (A/μm)	vd (V)	vg (V)	Id (A/μm)	vd (V)	vg (V)	Id (A/μm)	vd (V)	vg (V)	vd (V)	Id (A/μm)	vg (V)	vd (V)	Id (A/μm)	vg (V)	vd (V)	Id (A/μm)	vg (V)	vd (V)	Id (A/μm)	vg (V)	vd (V)	Id (A/μm)	vg (V)	vd (V)	Id (A/μm)	vg (V)	vd (V)	Id (A/μm)	vg (V)	vd (V)	Id (A/μm)	vg (V)	vd (V)	Id (A/μm)	vg (V)	vd (V)
-60	1.4e-09	1	-60	1.44e-13	1	-60	8.65e-14	1	-60	6.8e-14	1	-60	6.16667e-11	1	-60	5.53333e-13	1	-80	3.08333e-13	1	-60	1	-2.5e-14	-60	1	1.13e-10	-60	1	1.39e-10	-60	1	1.75333e-10	-60	1	-1.52e-12	-60	1	-1.17667e-12	-60	1	1.45333e-11	-60	1	3.36667e-11	-60	1	4.83333e-12	-60	1
-59.4	1.325e-09	1	-59.4	1.295e-13	1	-59.4	7.05e-14	1	-59.4	5.36667e-14	1	-59.4	4.56667e-11	1	-59.4	4.23333e-13	1	-79.3	1.97333e-13	1	-59.4	1	-6.3e-14	-59.4	1	1.13e-10	-59.4	1	1.39e-10	-59.4	1	1.79e-10	-59.2	1	-2.42e-13	-59.2	1	6.9e-13	-59.2	1	-5.56667e-12	-59.2	1	2.49333e-11	-59.4	1	8.06667e-12	-59.4	1
-58.8	1.415e-09	1	-58.8	1.095e-13	1	-58.8	6.45e-14	1	-58.8	4.4e-14	1	-58.8	3.9e-11	1	-58.8	3.43333e-13	1	-78.6	2.86667e-14	1	-58.8	1	-8.06667e-14	-58.8	1	1.11e-10	-58.8	1	1.39e-10	-58.8	1	1.79667e-10	-58.4	1	-5.33333e-13	-58.4	1	1.32e-13	-58.4	1	2.78e-12	-58.4	1	1.70333e-11	-58.8	1	-2.8e-13	-58.8	1
-58.2	1.385e-09	1	-58.2	1.035e-13	1	-58.2	5.35e-14	1	-58.2	4e-14	1	-58.2	3.15333e-11	1	-58.2	2.69667e-13	1	-77.9	7.8e-14	1	-58.2	1	-1.34e-13	-58.2	1	1.1e-10	-58.2	1	1.39e-10	-58.2	1	1.80667e-10	-57.6	1	-9.5e-13	-57.6	1	-8.8e-13	-57.6	1	-9e-12	-57.6	1	9.5e-12	-58.2	1	7.36667e-12	-58.2	1
-57.6	1.305e-09	1	-57.6	9e-14	1	-57.6	5.3e-14	1	-57.6	3.30333e-14	1	-57.6	2.75333e-11	1	-57.6	2.48e-13	1	-77.2	-5.36667e-14	1	-57.6	1	-1.49333e-13	-57.6	1	1.1e-10	-57.6	1	1.39e-10	-57.6	1	1.81e-10	-56.8	1	-7.93333e-13	-56.8	1	-1.16667e-12	-56.8	1	-7.96667e-12	-56.8	1	7.5e-12	-57.6	1	1.73667e-12	-57.6	1
-57	1.425e-09	1	-57	8.45e-14	1	-57	4.435e-14	1	-57	3.27e-14	1	-57	1.92e-11	1	-57	2.38333e-13	1	-76.5	2.53333e-14	1	-57	1	-1.54e-13	-57	1	1.10667e-10	-57	1	1.38333e-10	-57	1	1.79333e-10	-56	1	-1.49667e-12	-56	1	-1.4e-12	-56	1	-7.16667e-12	-56	1	7.03333e-12	-57	1	2.37e-12	-57	1
-56.4	1.38e-09	1	-56.4	7.9e-14	1	-56.4	4.445e-14	1	-56.4	2.85667e-14	1	-56.4	1.99333e-11	1	-56.4	2.08333e-13	1	-75.8	-8.63333e-14	1	-56.4	1	-1.86667e-13	-56.4	1	1.09667e-10	-56.4	1	1.39e-10	-56.4	1	1.81e-10	-55.2	1	-1.92333e-12	-55.2	1	-1.53667e-12	-55.2	1	-6.76667e-12	-55.2	1	4.76667e-12	-56.4	1	-4.23333e-12	-56.4	1
-55.8	1.365e-09	1	-55.8	7.1e-14	1	-55.8	3.87e-14	1	-55.8	2.83e-14	1	-55.8	1.93667e-11	1	-55.8	1.79e-13	1	-75.1	-4.03333e-14	1	-55.8	1	-1.51667e-13	-55.8	1	1.10667e-10	-55.8	1	1.39e-10	-55.8	1	1.77333e-10	-54.4	1	-1.99e-12	-54.4	1	-2.05e-12	-54.4	1	-6.53333e-12	-54.4	1	5.03333e-12	-55.8	1	-5.6e-12	-55.8	1
-55.2	1.27e-09	1	-55.2	7e-14	1	-55.2	3.76e-14	1	-55.2	2.34e-14	1	-55.2	1.74e-11	1	-55.2	1.63333e-13	1	-74.4	-1.06667e-13	1	-55.2	1	-1.82333e-13	-55.2	1	1.1e-10	-55.2	1	1.39667e-10	-55.2	1	1.77667e-10	-53.6	1	-2.15667e-12	-53.6	1	-1.95333e-12	-53.6	1	-6.2e-12	-53.6	1	4e-12	-55.2	1	4.4e-14	-55.2	1
-54.6	1.265e-09	1	-54.6	6.1e-14	1	-54.6	3.18e-14	1	-54.6	2.49e-14	1	-54.6	1.38667e-11	1	-54.6	1.46e-13	1	-73.7	-5.73333e-14	1	-54.6	1	-1.65333e-13	-54.6	1	1.10333e-10	-54.6	1	1.38667e-10	-54.6	1	1.79e-10	-52.8	1	-2.34e-12	-52.8	1	-2.09333e-12	-52.8	1	-5.86667e-12	-52.8	1	2.97e-12	-54.6	1	-2.56e-12	-54.6	1
-54	9.65e-10	1	-54	6.45e-14	1	-54	3.555e-14	1	-54	2.22e-14	1	-54	1.33e-11	1	-54	1.37e-13	1	-73	-1.19333e-13	1	-54	1	-2.22333e-13	-54	1	1.11333e-10	-54	1	1.40667e-10	-54	1	1.79e-10	-52	1	-2.42667e-12	-52	1	-2.04667e-12	-52	1	-5.5e-12	-52	1	2.03667e-12	-54	1	1.30667e-12	-54	1
-53.4	8.95e-10	1	-53.4	5.3e-14	1	-53.4	2.665e-14	1	-53.4	2.13333e-14	1	-53.4	1.18333e-11	1	-53.4	1.04e-13	1	-72.3	-7.33333e-14	1	-53.4	1	-1.58e-13	-53.4	1	1.09333e-10	-53.4	1	1.41e-10	-53.4	1	1.79e-10	-51.2	1	-2.40333e-12	-51.2	1	-2.07667e-12	-51.2	1	-5.03333e-12	-51.2	1	1.35667e-12	-53.4	1	-4.96667e-13	-53.4	1
-52.8	8.9e-10	1	-52.8	5.8e-14	1	-52.8	3.085e-14	1	-52.8	2.05333e-14	1	-52.8	1.19e-11	1	-52.8	1.1e-13	1	-71.6	-1.04333e-13	1	-52.8	1	-2.18e-13	-52.8	1	1.09e-10	-52.8	1	1.41333e-10	-52.8	1	1.78e-10	-50.4	1	-2.47667e-12	-50.4	1	-2.08333e-12	-50.4	1	-4.46667e-12	-50.4	1	8.96667e-13	-52.8	1	-2.07667e-12	-52.8	1
-52.2	9.2e-10	1	-52.2	4.85e-14	1	-52.2	2.365e-14	1	-52.2	1.78e-14	1	-52.2	9.73333e-12	1	-52.2	1.06667e-13	1	-70.9	-6.63333e-14	1	-52.2	1	-1.60667e-13	-52.2	1	1.1e-10	-52.2	1	1.42333e-10	-52.2	1	1.78333e-10	-49.6	1	-2.39667e-12	-49.6	1	-2.07667e-12	-49.6	1	-4.26667e-12	-49.6	1	1.07667e-13	-52.2	1	-2.90667e-12	-52.2	1
-51.6	9e-10	1	-51.6	5e-14	1	-51.6	2.65e-14	1	-51.6	1.83e-14	1	-51.6	9.36667e-12	1	-51.6	8.6e-14	1	-70.2	-4.23333e-14	1	-51.6	1	-2.36333e-13	-51.6	1	1.09e-10	-51.6	1	1.42333e-10	-51.6	1	1.78333e-10	-48.8	1	-2.34e-12	-48.8	1	-2.01e-12	-48.8	1	-4.43333e-12	-48.8	1	-6.36667e-14	-51.6	1	-1.97333e-12	-51.6	1
-51	9.45e-10	1	-51	4.66e-14	1	-51	2.385e-14	1	-51	1.51667e-14	1	-51	8.36667e-12	1	-51	7.46667e-14	1	-69.5	1.23333e-14	1	-51	1	-1.82e-13	-51	1	1.1e-10	-51	1	1.43667e-10	-51	1	1.77667e-10	-48	1	-2.23667e-12	-48	1	-1.91333e-12	-48	1	-4.63333e-12	-48	1	-4.36667e-13	-51	1	-3.06667e-12	-51	1
-50.4	1.055e-09	1	-50.4	4.35e-14	1	-50.4	2.445e-14	1	-50.4	1.79e-14	1	-50.4	7.7e-12	1	-50.4	9.86667e-14	1	-68.8	1.68667e-13	1	-50.4	1	-2.39e-13	-50.4	1	1.11e-10	-50.4	1	1.45333e-10	-50.4	1	1.78333e-10	-47.2	1	-2.12333e-12	-47.2	1	-1.87333e-12	-47.2	1	-3.86667e-12	-47.2	1	-6.5e-13	-50.4	1	2.26667e-12	-50.4	1
-49.8	1.065e-09	1	-49.8	4.235e-14	1	-49.8	2.01e-14	1	-49.8	1.28333e-14	1	-49.8	6.66667e-12	1	-49.8	7.33333e-14	1	-68.1	3.18e-13	1	-49.8	1	-2.03667e-13	-49.8	1	1.10333e-10	-49.8	1	1.44667e-10	-49.8	1	1.77667e-10	-46.4	1	-2.01e-12	-46.4	1	-1.74333e-12	-46.4	1	-4.26667e-12	-46.4	1	-8.26667e-13	-49.8	1	3.93333e-12	-49.8	1
-49.2	1.02e-09	1	-49.2	4.12e-14	1	-49.2	2.08e-14	1	-49.2	1.44333e-14	1	-49.2	5.96667e-12	1	-49.2	5.8e-14	1	-67.4	7.6e-13	1	-49.2	1	-2.24e-13	-49.2	1	1.08e-10	-49.2	1	1.44e-10	-49.2	1	1.76333e-10	-45.6	1	-1.95e-12	-45.6	1	-1.70333e-12	-45.6	1	-3.4e-12	-45.6	1	-9e-13	-49.2	1	-5.6e-13	-49.2	1
-48.6	1.01e-09	1	-48.6	4.355e-14	1	-48.6	1.715e-14	1	-48.6	1.24667e-14	1	-48.6	5.86667e-12	1	-48.6	9.33333e-14	1	-66.7	1.32667e-12	1	-48.6	1	-1.90333e-13	-48.6	1	1.11e-10	-48.6	1	1.44333e-10	-48.6	1	1.76667e-10	-44.8	1	-1.90667e-12	-44.8	1	-1.62667e-12	-44.8	1	-3.7e-12	-44.8	1	-1.03333e-12	-48.6	1	2.86e-12	-48.6	1
-48	1.1e-09	1	-48	3.555e-14	1	-48	1.895e-14	1	-48	1.06333e-14	1	-48	5.1e-12	1	-48	5.06667e-14	1	-66	2.28667e-12	1	-48	1	-2.07333e-13	-48	1	1.11333e-10	-48	1	1.44667e-10	-48	1	1.78333e-10	-44	1	-1.83e-12	-44	1	-1.55333e-12	-44	1	-5.6e-12	-44	1	-1.07667e-12	-48	1	9.4e-13	-48	1
-47.4	1.055e-09	1	-47.4	3.88e-14	1	-47.4	1.705e-14	1	-47.4	1.11667e-14	1	-47.4	4.23333e-12	1	-47.4	6.56667e-14	1	-65.3	3.56667e-12	1	-47.4	1	-1.72e-13	-47.4	1	1.11333e-10	-47.4	1	1.45333e-10	-47.4	1	1.78333e-10	-43.2	1	-1.83333e-12	-43.2	1	-1.49333e-12	-43.2	1	-5.1e-12	-43.2	1	-1.10333e-12	-47.4	1	2.41e-12	-47.4	1
-46.8	1.07e-09	1	-46.8	3.14e-14	1	-46.8	1.31e-14	1	-46.8	9.13333e-15	1	-46.8	4.13333e-12	1	-46.8	5.63333e-14	1	-64.6	5.76667e-12	1	-46.8	1	-2.52667e-13	-46.8	1	1.10667e-10	-46.8	1	1.45667e-10	-46.8	1	1.75667e-10	-42.4	1	-1.82333e-12	-42.4	1	-1.43667e-12	-42.4	1	-4.96667e-12	-42.4	1	-1.23e-12	-46.8	1	2.07667e-12	-46.8	1
-46.2	9.6e-10	1	-46.2	3.68e-14	1	-46.2	1.34e-14	1	-46.2	1.1e-14	1	-46.2	3.66667e-12	1	-46.2	3.33333e-14	1	-63.9	8.23333e-12	1	-46.2	1	-2.27667e-13	-46.2	1	1.11e-10	-46.2	1	1.44667e-10	-46.2	1	1.76667e-10	-41.6	1	-1.83e-12	-41.6	1	-1.37e-12	-41.6	1	-6.13333e-12	-41.6	1	-1.3e-12	-46.2	1	4.56667e-12	-46.2	1
-45.6	9.9e-10	1	-45.6	2.895e-14	1	-45.6	1.065e-14	1	-45.6	6.46667e-15	1	-45.6	3.31333e-12	1	-45.6	3.1e-14	1	-63.2	1.21333e-11	1	-45.6	1	-2.41333e-13	-45.6	1	1.11667e-10	-45.6	1	1.46333e-10	-45.6	1	1.75e-10	-40.8	1	-1.8e-12	-40.8	1	-1.40667e-12	-40.8	1	-4.46667e-12	-40.8	1	-1.27333e-12	-45.6	1	7.06667e-12	-45.6	1
-45	1.03e-09	1	-45	3.4e-14	1	-45	1.185e-14	1	-45	8.33333e-15	1	-45	2.96e-12	1	-45	3.26667e-14	1	-62.5	1.72e-11	1	-45	1	-2.12667e-13	-45	1	1.11e-10	-45	1	1.46333e-10	-45	1	1.78e-10	-40	1	-1.92667e-12	-40	1	-1.45e-12	-40	1	-4.56667e-12	-40	1	-1.42667e-12	-45	1	7.56667e-12	-45	1
-44.4	1.095e-09	1	-44.4	2.8e-14	1	-44.4	4.385e-15	1	-44.4	6.06667e-15	1	-44.4	2.42e-12	1	-44.4	3.33333e-14	1	-61.8	2.24333e-11	1	-44.4	1	-2.07e-13	-44.4	1	1.10667e-10	-44.4	1	1.45333e-10	-44.4	1	1.75667e-10	-39.2	1	-1.93e-12	-39.2	1	-1.46667e-12	-39.2	1	-5.63333e-12	-39.2	1	-1.42667e-12	-44.4	1	2.23e-12	-44.4	1
-43.8	1.095e-09	1	-43.8	2.95e-14	1	-43.8	9.5e-15	1	-43.8	1.00667e-14	1	-43.8	1.93333e-12	1	-43.8	7.16667e-14	1	-61.1	3.23e-11	1	-43.8	1	-1.96e-13	-43.8	1	1.10333e-10	-43.8	1	1.45333e-10	-43.8	1	1.76e-10	-38.4	1	-2.23e-12	-38.4	1	-2.26667e-12	-38.4	1	-3.43333e-12	-38.4	1	-1.36333e-12	-43.8	1	8.13333e-12	-43.8	1
-43.2	1.11e-09	1	-43.2	2.73e-14	1	-43.2	5.25e-15	1	-43.2	6.9e-15	1	-43.2	1.66667e-12	1	-43.2	3.1e-14	1	-60.4	4.2e-11	1	-43.2	1	-2.17333e-13	-43.2	1	1.09333e-10	-43.2	1	1.44333e-10	-43.2	1	1.75667e-10	-37.6	1	-2.07e-12	-37.6	1	-2.03667e-12	-37.6	1	-4.6e-12	-37.6	1	-1.50667e-12	-43.2	1	5.43333e-12	-43.2	1
-42.6	1.08e-09	1	-42.6	2.625e-14	1	-42.6	6.95e-15	1	-42.6	7.83333e-15	1	-42.6	1.29333e-12	1	-42.6	2.73333e-14	1	-59.7	5.5e-11	1	-42.6	1	-2.31333e-13	-42.6	1	1.09e-10	-42.6	1	1.45e-10	-42.6	1	1.73e-10	-36.8	1	-1.80667e-12	-36.8	1	-2.37e-12	-36.8	1	-4.96667e-12	-36.8	1	-1.38333e-12	-42.6	1	3.9e-12	-42.6	1
-42	1.055e-09	1	-42	2.535e-14	1	-42	6.35e-15	1	-42	8.86667e-15	1	-42	1.35e-12	1	-42	1.06667e-14	1	-59	7.13333e-11	1	-42	1	-2.23667e-13	-42	1	1.1e-10	-42	1	1.45333e-10	-42	1	1.73667e-10	-36	1	-1.93e-12	-36	1	-1.37e-12	-36	1	-5.36667e-12	-36	1	-1.42333e-12	-42	1	5.43333e-12	-42	1
-41.4	1.04e-09	1	-41.4	2.27e-14	1	-41.4	7.25e-15	1	-41.4	6.43333e-15	1	-41.4	8.83333e-13	1	-41.4	5e-15	1	-58.3	9.36667e-11	1	-41.4	1	-2.25e-13	-41.4	1	1.1e-10	-41.4	1	1.45333e-10	-41.4	1	1.74667e-10	-35.2	1	-1.77333e-12	-35.2	1	-1.58667e-12	-35.2	1	-4.46667e-12	-35.2	1	-1.48333e-12	-41.4	1	6.93333e-12	-41.4	1
-40.8	1.1e-09	1	-40.8	2.72e-14	1	-40.8	1.025e-14	1	-40.8	8.76667e-15	1	-40.8	5.06667e-13	1	-40.8	8.66667e-15	1	-57.6	1.26e-10	1	-40.8	1	-2.01333e-13	-40.8	1	1.09667e-10	-40.8	1	1.46e-10	-40.8	1	1.74333e-10	-34.4	1	-1.48333e-12	-34.4	1	-1.84667e-12	-34.4	1	-6.53333e-12	-34.4	1	-1.46667e-12	-40.8	1	6.13333e-12	-40.8	1
-40.2	1.145e-09	1	-40.2	1.195e-14	1	-40.2	6.1e-15	1	-40.2	2.40667e-15	1	-40.2	5.5e-14	1	-40.2	0	1	-56.9	1.70333e-10	1	-40.2	1	-2.41667e-13	-40.2	1	1.1e-10	-40.2	1	1.45333e-10	-40.2	1	1.76e-10	-33.6	1	-1.75667e-12	-33.6	1	-1.51667e-12	-33.6	1	-5.6e-12	-33.6	1	-1.51e-12	-40.2	1	1.18333e-11	-40.2	1
-39.6	1.15e-09	1	-39.6	2.735e-14	1	-39.6	1.1e-14	1	-39.6	7.23333e-15	1	-39.6	-5.9e-13	1	-39.6	3.66667e-14	1	-56.2	2.21333e-10	1	-39.6	1	-2.30667e-13	-39.6	1	1.10333e-10	-39.6	1	1.45333e-10	-39.6	1	1.76e-10	-32.8	1	-1.52333e-12	-32.8	1	-1.10333e-12	-32.8	1	-5.43333e-12	-32.8	1	-1.64667e-12	-39.6	1	1.40667e-11	-39.6	1
-39	1.2e-09	1	-39	2e-14	1	-39	5.15e-15	1	-39	3.76667e-15	1	-39	-1.46333e-12	1	-39	-6.66667e-15	1	-55.5	2.90333e-10	1	-39	1	-2.34667e-13	-39	1	1.11333e-10	-39	1	1.45e-10	-39	1	1.75333e-10	-32	1	-1.75e-12	-32	1	-7.16667e-13	-32	1	-5.76667e-12	-32	1	-1.46667e-12	-39	1	1.79333e-11	-39	1
-38.4	1.205e-09	1	-38.4	2.61e-14	1	-38.4	9.45e-15	1	-38.4	5.63333e-15	1	-38.4	-1.93e-12	1	-38.4	-6.33333e-15	1	-54.8	3.4e-10	1	-38.4	1	-2.09e-13	-38.4	1	1.11333e-10	-38.4	1	1.44667e-10	-38.4	1	1.77e-10	-31.2	1	-1.57333e-12	-31.2	1	-7.66667e-13	-31.2	1	-4.5e-12	-31.2	1	-1.49667e-12	-38.4	1	2.21667e-11	-38.4	1
-37.8	1.11e-09	1	-37.8	2.415e-14	1	-37.8	6.85e-15	1	-37.8	5.06667e-15	1	-37.8	-3.46667e-12	1	-37.8	3.6e-14	1	-54.1	4.73333e-10	1	-37.8	1	-2.27333e-13	-37.8	1	1.12667e-10	-37.8	1	1.44333e-10	-37.8	1	1.77667e-10	-30.4	1	-1.45333e-12	-30.4	1	3.20667e-13	-30.4	1	-2.83667e-12	-30.4	1	-1.64667e-12	-37.8	1	3.08333e-11	-37.8	1
-37.2	1.19e-09	1	-37.2	2.825e-14	1	-37.2	9.35e-15	1	-37.2	5.6e-15	1	-37.2	-2.93333e-12	1	-37.2	-1.66667e-15	1	-53.4	6.23333e-10	1	-37.2	1	-2.31333e-13	-37.2	1	1.13333e-10	-37.2	1	1.44667e-10	-37.2	1	1.74333e-10	-29.6	1	-1.39e-12	-29.6	1	1.4e-13	-29.6	1	-1.81e-12	-29.6	1	-1.62e-12	-37.2	1	3.7e-11	-37.2	1
-36.6	1.065e-09	1	-36.6	2.705e-14	1	-36.6	7.3e-15	1	-36.6	5.93333e-15	1	-36.6	-3.6e-12	1	-36.6	-4.33333e-15	1	-52.7	8e-10	1	-36.6	1	-2.37333e-13	-36.6	1	1.12333e-10	-36.6	1	1.46333e-10	-36.6	1	1.77e-10	-28.8	1	-1.60667e-12	-28.8	1	1.9e-12	-28.8	1	-2.32333e-12	-28.8	1	-1.61e-12	-36.6	1	4.86667e-11	-36.6	1
-36	1.065e-09	1	-36	2.46e-14	1	-36	4.82e-15	1	-36	4.03333e-15	1	-36	-3.31e-12	1	-36	7.33333e-15	1	-52	1.01667e-09	1	-36	1	-2.31e-13	-36	1	1.12e-10	-36	1	1.47e-10	-36	1	1.76333e-10	-28	1	-1.38e-12	-28	1	3.07333e-12	-28	1	-1.44333e-12	-28	1	-1.71333e-12	-36	1	6.26667e-11	-36	1
-35.4	1.07e-09	1	-35.4	2.22e-14	1	-35.4	6.45e-15	1	-35.4	5.26667e-15	1	-35.4	-3.36667e-12	1	-35.4	1.13333e-14	1	-51.3	1.26e-09	1	-35.4	1	-2.43667e-13	-35.4	1	1.12e-10	-35.4	1	1.46e-10	-35.4	1	1.77e-10	-27.2	1	-1.58667e-12	-27.2	1	4.53333e-12	-27.2	1	-2.35667e-12	-27.2	1	-1.73333e-12	-35.4	1	7.03333e-11	-35.4	1
-34.8	1.01e-09	1	-34.8	1.855e-14	1	-34.8	2.885e-15	1	-34.8	3.8e-15	1	-34.8	-3.66667e-12	1	-34.8	1.8e-14	1	-50.6	1.56667e-09	1	-34.8	1	-2.08e-13	-34.8	1	1.12667e-10	-34.8	1	1.46667e-10	-34.8	1	1.75e-10	-26.4	1	-8.83333e-13	-26.4	1	6.76667e-12	-26.4	1	-1.63333e-12	-26.4	1	-1.73e-12	-34.8	1	8.4e-11	-34.8	1
-34.2	1.285e-09	1	-34.2	2.29e-14	1	-34.2	6.2e-15	1	-34.2	4.53333e-15	1	-34.2	-2.96e-12	1	-34.2	1.66667e-14	1	-49.9	1.91667e-09	1	-34.2	1	-2.44667e-13	-34.2	1	1.12e-10	-34.2	1	1.46333e-10	-34.2	1	1.75e-10	-25.6	1	-1.62333e-12	-25.6	1	9.6e-12	-25.6	1	-2.03667e-12	-25.6	1	-1.80333e-12	-34.2	1	9.26667e-11	-34.2	1
-33.6	1.05e-09	1	-33.6	1.625e-14	1	-33.6	9.7e-16	1	-33.6	3.31667e-15	1	-33.6	-2.34e-12	1	-33.6	-9.66667e-15	1	-49.2	2.34667e-09	1	-33.6	1	-2.25333e-13	-33.6	1	1.12667e-10	-33.6	1	1.47e-10	-33.6	1	1.75333e-10	-24.8	1	-2.65333e-13	-24.8	1	1.25e-11	-24.8	1	-2.14667e-12	-24.8	1	-1.75667e-12	-33.6	1	1.17667e-10	-33.6	1
-33	1.15e-09	1	-33	3.01e-14	1	-33	3.945e-15	1	-33	6.53333e-15	1	-33	-2.05e-12	1	-33	-2.7e-14	1	-48.5	2.85333e-09	1	-33	1	-2.52667e-13	-33	1	1.12e-10	-33	1	1.46333e-10	-33	1	1.75e-10	-24	1	-1.4e-13	-24	1	2.01333e-11	-24	1	-1.60667e-12	-24	1	-1.82e-12	-33	1	1.47333e-10	-33	1
-32.4	1.04e-09	1	-32.4	2.65e-14	1	-32.4	1.365e-15	1	-32.4	6.6e-15	1	-32.4	-6e-13	1	-32.4	5e-15	1	-47.8	3.43333e-09	1	-32.4	1	-2.37667e-13	-32.4	1	1.11e-10	-32.4	1	1.45667e-10	-32.4	1	1.74333e-10	-23.2	1	9.56667e-13	-23.2	1	2.59667e-11	-23.2	1	-2.02667e-12	-23.2	1	-1.83e-12	-32.4	1	2e-10	-32.4	1
-31.8	1e-09	1	-31.8	3.87e-14	1	-31.8	1.11e-15	1	-31.8	8.76667e-15	1	-31.8	5.66667e-13	1	-31.8	-2.1e-14	1	-47.1	4.03333e-09	1	-31.8	1	-2.29e-13	-31.8	1	1.11333e-10	-31.8	1	1.44667e-10	-31.8	1	1.74333e-10	-22.4	1	2.15e-12	-22.4	1	4.1e-11	-22.4	1	-1.13667e-12	-22.4	1	-1.85333e-12	-31.8	1	2.19333e-10	-31.8	1
-31.2	1.025e-09	1	-31.2	4.435e-14	1	-31.2	3.28e-15	1	-31.2	1.42333e-14	1	-31.2	1.27e-12	1	-31.2	-1.66667e-15	1	-46.4	4.8e-09	1	-31.2	1	-2.32333e-13	-31.2	1	1.11667e-10	-31.2	1	1.46333e-10	-31.2	1	1.77667e-10	-21.6	1	3.22667e-12	-21.6	1	4.7e-11	-21.6	1	-1.90667e-12	-21.6	1	-1.95667e-12	-31.2	1	2.16e-10	-31.2	1
-30.6	1.075e-09	1	-30.6	6.4e-14	1	-30.6	2.345e-15	1	-30.6	1.76667e-14	1	-30.6	1.81667e-12	1	-30.6	1.33333e-15	1	-45.7	5.66667e-09	1	-30.6	1	-2.41333e-13	-30.6	1	1.11333e-10	-30.6	1	1.46667e-10	-30.6	1	1.78e-10	-20.8	1	5.06667e-12	-20.8	1	6.5e-11	-20.8	1	-2.43e-12	-20.8	1	-1.95333e-12	-30.6	1	2.34e-10	-30.6	1
-30	1.015e-09	1	-30	8.05e-14	1	-30	2.24e-15	1	-30	3.43333e-14	1	-30	3.56667e-12	1	-30	3.46667e-14	1	-45	6.7e-09	1	-30	1	-2.29667e-13	-30	1	1.1e-10	-30	1	1.48333e-10	-30	1	1.76333e-10	-20	1	6.66667e-12	-20	1	7.53333e-11	-20	1	-1.68333e-12	-20	1	-1.95e-12	-30	1	3.05e-10	-30	1
-29.4	1.125e-09	1	-29.4	1.2e-13	1	-29.4	-2.35e-16	1	-29.4	5.66667e-14	1	-29.4	4.8e-12	1	-29.4	-6e-15	1	-44.3	7.8e-09	1	-29.4	1	-2.31333e-13	-29.4	1	1.1e-10	-29.4	1	1.46667e-10	-29.4	1	1.76667e-10	-19.2	1	1.11e-11	-19.2	1	9.93333e-11	-19.2	1	4.73333e-13	-19.2	1	-2.08667e-12	-29.4	1	3.27333e-10	-29.4	1
-28.8	1.065e-09	1	-28.8	1.715e-13	1	-28.8	3.255e-15	1	-28.8	9.26667e-14	1	-28.8	6.33333e-12	1	-28.8	1e-15	1	-43.6	9.03333e-09	1	-28.8	1	-2.13333e-13	-28.8	1	1.09333e-10	-28.8	1	1.46e-10	-28.8	1	1.77667e-10	-18.4	1	1.63e-11	-18.4	1	1.29333e-10	-18.4	1	4.03333e-13	-18.4	1	-2.01e-12	-28.8	1	3.31333e-10	-28.8	1
-28.2	1.155e-09	1	-28.2	2.475e-13	1	-28.2	-2.405e-15	1	-28.2	1.36e-13	1	-28.2	8.53333e-12	1	-28.2	-1.63333e-14	1	-42.9	1.04e-08	1	-28.2	1	-2.46333e-13	-28.2	1	1.10333e-10	-28.2	1	1.47e-10	-28.2	1	1.76667e-10	-17.6	1	2.40333e-11	-17.6	1	1.54667e-10	-17.6	1	1.96667e-12	-17.6	1	-2.00333e-12	-28.2	1	4.53333e-10	-28.2	1
-27.6	1.145e-09	1	-27.6	3.745e-13	1	-27.6	1.78e-15	1	-27.6	2.17667e-13	1	-27.6	1.04e-11	1	-27.6	-2.03333e-14	1	-42.2	1.19e-08	1	-27.6	1	-1.95e-13	-27.6	1	1.09e-10	-27.6	1	1.47333e-10	-27.6	1	1.75e-10	-16.8	1	3.16667e-11	-16.8	1	2.02667e-10	-16.8	1	7.83333e-13	-16.8	1	-2.15e-12	-27.6	1	6.23333e-10	-27.6	1
-27	1.045e-09	1	-27	5.6e-13	1	-27	-2.755e-15	1	-27	3.8e-13	1	-27	1.32667e-11	1	-27	3.33333e-16	1	-41.5	1.37e-08	1	-27	1	-2.04e-13	-27	1	1.09e-10	-27	1	1.47e-10	-27	1	1.76e-10	-16	1	5.36667e-11	-16	1	2.37333e-10	-16	1	2.11667e-12	-16	1	-2.14e-12	-27	1	6.16667e-10	-27	1
-26.4	1.09e-09	1	-26.4	8.85e-13	1	-26.4	1.975e-15	1	-26.4	5.96667e-13	1	-26.4	1.60333e-11	1	-26.4	-1.23333e-14	1	-40.8	1.55333e-08	1	-26.4	1	-1.92667e-13	-26.4	1	1.09333e-10	-26.4	1	1.48333e-10	-26.4	1	1.76333e-10	-15.2	1	6.73333e-11	-15.2	1	2.92e-10	-15.2	1	6.83333e-12	-15.2	1	-2.17667e-12	-26.4	1	5.96667e-10	-26.4	1
-25.8	1.23e-09	1	-25.8	1.44e-12	1	-25.8	-6.5e-16	1	-25.8	9.16667e-13	1	-25.8	2.02e-11	1	-25.8	-3.33333e-16	1	-40.1	1.76e-08	1	-25.8	1	-1.67333e-13	-25.8	1	1.09667e-10	-25.8	1	1.47e-10	-25.8	1	1.75333e-10	-14.4	1	8.26667e-11	-14.4	1	3.53333e-10	-14.4	1	9.1e-12	-14.4	1	-2.26e-12	-25.8	1	6.06667e-10	-25.8	1
-25.2	1.105e-09	1	-25.2	2.22e-12	1	-25.2	-8.05e-16	1	-25.2	1.43333e-12	1	-25.2	2.44667e-11	1	-25.2	-8.33333e-15	1	-39.4	1.98667e-08	1	-25.2	1	-7.7e-14	-25.2	1	1.1e-10	-25.2	1	1.47333e-10	-25.2	1	1.75e-10	-13.6	1	1.04e-10	-13.6	1	3.53333e-10	-13.6	1	1.25667e-11	-13.6	1	-2.30667e-12	-25.2	1	6.6e-10	-25.2	1
-24.6	1.12e-09	1	-24.6	3.37e-12	1	-24.6	-1.36e-15	1	-24.6	2.12e-12	1	-24.6	2.97333e-11	1	-24.6	-5.76667e-14	1	-38.7	2.23667e-08	1	-24.6	1	1.04e-13	-24.6	1	1.10667e-10	-24.6	1	1.47e-10	-24.6	1	1.75667e-10	-12.8	1	1.19e-10	-12.8	1	5e-10	-12.8	1	1.40333e-11	-12.8	1	-2.36667e-12	-24.6	1	7.23333e-10	-24.6	1
-24	1.14e-09	1	-24	5.55e-12	1	-24	-1.535e-15	1	-24	2.88333e-12	1	-24	3.53333e-11	1	-24	6.33333e-15	1	-38	2.50667e-08	1	-24	1	3.4e-13	-24	1	1.12333e-10	-24	1	1.46667e-10	-24	1	1.76667e-10	-12	1	1.63e-10	-12	1	6.03333e-10	-12	1	2.56e-11	-12	1	-2.46e-12	-24	1	7.63333e-10	-24	1
-23.4	1.275e-09	1	-23.4	8.9e-12	1	-23.4	-2.07e-16	1	-23.4	4.1e-12	1	-23.4	4.33333e-11	1	-23.4	-3.66667e-14	1	-37.3	2.8e-08	1	-23.4	1	7.2e-13	-23.4	1	1.12333e-10	-23.4	1	1.46333e-10	-23.4	1	1.77667e-10	-11.2	1	2.05667e-10	-11.2	1	7.3e-10	-11.2	1	3.43333e-11	-11.2	1	-2.49667e-12	-23.4	1	8.03333e-10	-23.4	1
-22.8	1.295e-09	1	-22.8	1.4e-11	1	-22.8	-2.75e-15	1	-22.8	6.7e-12	1	-22.8	5.4e-11	1	-22.8	-3.63333e-14	1	-36.6	3.13e-08	1	-22.8	1	1.24333e-12	-22.8	1	1.12e-10	-22.8	1	1.47333e-10	-22.8	1	1.78667e-10	-10.4	1	2.37667e-10	-10.4	1	9e-10	-10.4	1	4.8e-11	-10.4	1	-2.51667e-12	-22.8	1	9.16667e-10	-22.8	1
-22.2	1.36e-09	1	-22.2	2.19e-11	1	-22.2	-1.465e-15	1	-22.2	9.2e-12	1	-22.2	6.46667e-11	1	-22.2	-2.16667e-14	1	-35.9	3.46667e-08	1	-22.2	1	1.98333e-12	-22.2	1	1.14e-10	-22.2	1	1.47333e-10	-22.2	1	1.75667e-10	-9.6	1	2.75333e-10	-9.6	1	1.16e-09	-9.6	1	6.03333e-11	-9.6	1	-2.63e-12	-22.2	1	9.6e-10	-22.2	1
-21.6	1.42e-09	1	-21.6	2.895e-11	1	-21.6	-6.75e-15	1	-21.6	1.30333e-11	1	-21.6	7.66667e-11	1	-21.6	-2.96667e-14	1	-35.2	3.83333e-08	1	-21.6	1	3.12e-12	-21.6	1	1.13667e-10	-21.6	1	1.47e-10	-21.6	1	1.78667e-10	-8.8	1	3.4e-10	-8.8	1	1.25e-09	-8.8	1	5.76667e-11	-8.8	1	-2.65667e-12	-21.6	1	9.36667e-10	-21.6	1
-21	1.475e-09	1	-21	5.7e-11	1	-21	-1.53e-15	1	-21	1.54e-11	1	-21	9.3e-11	1	-21	-2.46667e-14	1	-34.5	4.23333e-08	1	-21	1	4.63333e-12	-21	1	1.13e-10	-21	1	1.48e-10	-21	1	1.79667e-10	-8	1	3.96667e-10	-8	1	1.70333e-09	-8	1	9.36667e-11	-8	1	-2.72333e-12	-21	1	9.8e-10	-21	1
-20.4	1.67e-09	1	-20.4	9.95e-11	1	-20.4	-3.905e-15	1	-20.4	2.75e-11	1	-20.4	1.10667e-10	1	-20.4	-3.43333e-14	1	-33.8	4.7e-08	1	-20.4	1	7.23333e-12	-20.4	1	1.15e-10	-20.4	1	1.48e-10	-20.4	1	1.77333e-10	-7.2	1	4.4e-10	-7.2	1	1.91333e-09	-7.2	1	1.14333e-10	-7.2	1	-2.8e-12	-20.4	1	1.07667e-09	-20.4	1
-19.8	1.76e-09	1	-19.8	1.58e-10	1	-19.8	-4.175e-16	1	-19.8	4.03333e-11	1	-19.8	1.34e-10	1	-19.8	-9.66667e-15	1	-33.1	5.16667e-08	1	-19.8	1	9.76667e-12	-19.8	1	1.14667e-10	-19.8	1	1.48333e-10	-19.8	1	1.80667e-10	-6.4	1	5.53333e-10	-6.4	1	2.20667e-09	-6.4	1	1.64e-10	-6.4	1	-2.82333e-12	-19.8	1	7.93333e-10	-19.8	1
-19.2	1.97e-09	1	-19.2	2.4e-10	1	-19.2	-3.62e-15	1	-19.2	5.8e-11	1	-19.2	1.64667e-10	1	-19.2	-2.33333e-14	1	-32.4	5.66667e-08	1	-19.2	1	1.47333e-11	-19.2	1	1.16333e-10	-19.2	1	1.49333e-10	-19.2	1	1.8e-10	-5.6	1	6.43333e-10	-5.6	1	2.89e-09	-5.6	1	2.04333e-10	-5.6	1	-3.46667e-12	-19.2	1	9.33333e-10	-19.2	1
-18.6	2.115e-09	1	-18.6	3.14e-10	1	-18.6	-2.98e-15	1	-18.6	8.06667e-11	1	-18.6	1.97667e-10	1	-18.6	-2.63333e-14	1	-31.7	6.16667e-08	1	-18.6	1	2.1e-11	-18.6	1	1.19333e-10	-18.6	1	1.5e-10	-18.6	1	1.79333e-10	-4.8	1	7.4e-10	-4.8	1	3.46667e-09	-4.8	1	3.32333e-10	-4.8	1	-3.7e-12	-18.6	1	1.00333e-09	-18.6	1
-18	2.32e-09	1	-18	4.97e-10	1	-18	-3.99e-15	1	-18	1.11333e-10	1	-18	2.36667e-10	1	-18	-1.3e-14	1	-31	6.76667e-08	1	-18	1	2.69333e-11	-18	1	1.21667e-10	-18	1	1.51333e-10	-18	1	1.77e-10	-4	1	9.13333e-10	-4	1	3.9e-09	-4	1	3.9e-10	-4	1	-3.7e-12	-18	1	1.04e-09	-18	1
-17.4	2.76e-09	1	-17.4	7.2e-10	1	-17.4	-3.775e-15	1	-17.4	1.51333e-10	1	-17.4	2.87333e-10	1	-17.4	-5.16667e-14	1	-30.3	7.36667e-08	1	-17.4	1	3.63333e-11	-17.4	1	1.24333e-10	-17.4	1	1.50667e-10	-17.4	1	1.79667e-10	-3.2	1	1.13333e-09	-3.2	1	4e-09	-3.2	1	4.73333e-10	-3.2	1	-4e-12	-17.4	1	1.07e-09	-17.4	1
-16.8	3.325e-09	1	-16.8	1.005e-09	1	-16.8	-7.5e-15	1	-16.8	1.89667e-10	1	-16.8	2.90333e-10	1	-16.8	-4.43333e-14	1	-29.6	8.03333e-08	1	-16.8	1	4.96667e-11	-16.8	1	1.27667e-10	-16.8	1	1.52e-10	-16.8	1	1.8e-10	-2.4	1	1.32333e-09	-2.4	1	5.26667e-09	-2.4	1	5.26667e-10	-2.4	1	-4.26667e-12	-16.8	1	1.3e-09	-16.8	1
-16.2	3.895e-09	1	-16.2	1.35e-09	1	-16.2	-3.735e-15	1	-16.2	2.67333e-10	1	-16.2	3.43333e-10	1	-16.2	-4.06667e-14	1	-28.9	8.7e-08	1	-16.2	1	6.26667e-11	-16.2	1	1.33333e-10	-16.2	1	1.52667e-10	-16.2	1	1.81333e-10	-1.6	1	1.57e-09	-1.6	1	6.76667e-09	-1.6	1	7.6e-10	-1.6	1	-4.16667e-12	-16.2	1	1.41667e-09	-16.2	1
-15.6	4.68e-09	1	-15.6	1.775e-09	1	-15.6	-7.95e-15	1	-15.6	3.6e-10	1	-15.6	4.5e-10	1	-15.6	-3.33333e-14	1	-28.2	9.43333e-08	1	-15.6	1	8e-11	-15.6	1	1.38333e-10	-15.6	1	1.53333e-10	-15.6	1	1.84333e-10	-0.8	1	1.87e-09	-0.8	1	7.06667e-09	-0.8	1	1.12e-09	-0.8	1	-3.9e-12	-15.6	1	1.55333e-09	-15.6	1
-15	5.65e-09	1	-15	2.27e-09	1	-15	-8.05e-15	1	-15	4.7e-10	1	-15	5.56667e-10	1	-15	-4.73333e-14	1	-27.5	1.02e-07	1	-15	1	9.73333e-11	-15	1	1.46667e-10	-15	1	1.53333e-10	-15	1	1.85e-10	0	1	2.25667e-09	0	1	9.13333e-09	0	1	9.33333e-10	0	1	-3.76667e-12	-15	1	1.73667e-09	-15	1
-14.4	6.65e-09	1	-14.4	2.495e-09	1	-14.4	-4.5e-15	1	-14.4	6e-10	1	-14.4	6.9e-10	1	-14.4	-4.23333e-14	1	-26.8	1.1e-07	1	-14.4	1	1.10667e-10	-14.4	1	1.51e-10	-14.4	1	1.53667e-10	-14.4	1	1.82333e-10	0.8	1	2.64667e-09	0.8	1	1.04333e-08	0.8	1	1.53667e-09	0.8	1	-3.73333e-12	-14.4	1	1.97667e-09	-14.4	1
-13.8	7.7e-09	1	-13.8	3.245e-09	1	-13.8	-8.8e-15	1	-13.8	7.56667e-10	1	-13.8	8.43333e-10	1	-13.8	-2.03333e-14	1	-26.1	1.18667e-07	1	-13.8	1	1.28667e-10	-13.8	1	1.62e-10	-13.8	1	1.56e-10	-13.8	1	1.86333e-10	1.6	1	3.16333e-09	1.6	1	1.11667e-08	1.6	1	1.7e-09	1.6	1	-3.7e-12	-13.8	1	2.34333e-09	-13.8	1
-13.2	8.9e-09	1	-13.2	4.125e-09	1	-13.2	-4.335e-15	1	-13.2	9.43333e-10	1	-13.2	1.00333e-09	1	-13.2	-2.96667e-14	1	-25.4	1.28e-07	1	-13.2	1	1.44e-10	-13.2	1	1.72e-10	-13.2	1	1.62333e-10	-13.2	1	1.88667e-10	2.4	1	3.86667e-09	2.4	1	1.27e-08	2.4	1	1.95333e-09	2.4	1	-3.8e-12	-13.2	1	2.76667e-09	-13.2	1
-12.6	1.055e-08	1	-12.6	5.1e-09	1	-12.6	-1.28e-14	1	-12.6	1.14333e-09	1	-12.6	1.20667e-09	1	-12.6	-2.63333e-14	1	-24.7	1.37333e-07	1	-12.6	1	1.65e-10	-12.6	1	1.9e-10	-12.6	1	1.7e-10	-12.6	1	1.88e-10	3.2	1	4.13333e-09	3.2	1	1.48e-08	3.2	1	2.47e-09	3.2	1	-3.86667e-12	-12.6	1	3.19667e-09	-12.6	1
-12	1.24e-08	1	-12	6.2e-09	1	-12	-7.55e-15	1	-12	1.36667e-09	1	-12	1.43667e-09	1	-12	-4.4e-14	1	-24	1.47333e-07	1	-12	1	1.86667e-10	-12	1	2e-10	-12	1	1.80667e-10	-12	1	1.94e-10	4	1	4.96667e-09	4	1	1.80333e-08	4	1	4.53333e-09	4	1	-4.03333e-12	-12	1	3.53333e-09	-12	1
-11.4	1.47e-08	1	-11.4	7.5e-09	1	-11.4	-1.015e-14	1	-11.4	1.51e-09	1	-11.4	1.69e-09	1	-11.4	-4.83333e-14	1	-23.3	1.57667e-07	1	-11.4	1	2.15e-10	-11.4	1	2.12333e-10	-11.4	1	1.88333e-10	-11.4	1	1.99e-10	4.8	1	5.73333e-09	4.8	1	2.00667e-08	4.8	1	4.13333e-09	4.8	1	-4.13333e-12	-11.4	1	3.93333e-09	-11.4	1
-10.8	1.695e-08	1	-10.8	9.05e-09	1	-10.8	-7.25e-15	1	-10.8	1.83667e-09	1	-10.8	1.99667e-09	1	-10.8	-3e-14	1	-22.6	1.69e-07	1	-10.8	1	2.43e-10	-10.8	1	2.39333e-10	-10.8	1	1.97667e-10	-10.8	1	2.08667e-10	5.6	1	6.43333e-09	5.6	1	2.13333e-08	5.6	1	4.76667e-09	5.6	1	-4.33333e-12	-10.8	1	4.6e-09	-10.8	1
-10.2	1.93e-08	1	-10.2	1.06e-08	1	-10.2	-1.24e-14	1	-10.2	2.19e-09	1	-10.2	2.37e-09	1	-10.2	-3.93333e-14	1	-21.9	1.80667e-07	1	-10.2	1	2.84667e-10	-10.2	1	2.56e-10	-10.2	1	2.11333e-10	-10.2	1	2.14667e-10	6.4	1	7.3e-09	6.4	1	2.41667e-08	6.4	1	5.96667e-09	6.4	1	-4.53333e-12	-10.2	1	5.23333e-09	-10.2	1
-9.6	2.215e-08	1	-9.6	1.235e-08	1	-9.6	-6.75e-15	1	-9.6	2.58333e-09	1	-9.6	2.76667e-09	1	-9.6	-4.6e-14	1	-21.2	1.92667e-07	1	-9.6	1	3.18667e-10	-9.6	1	2.76667e-10	-9.6	1	2.15e-10	-9.6	1	2.32667e-10	7.2	1	7.83333e-09	7.2	1	2.6e-08	7.2	1	5.63333e-09	7.2	1	-5.1e-12	-9.6	1	6.03333e-09	-9.6	1
-9	2.46e-08	1	-9	1.435e-08	1	-9	-1.24e-14	1	-9	3e-09	1	-9	3.19333e-09	1	-9	-3.3e-14	1	-20.5	2.05667e-07	1	-9	1	3.6e-10	-9	1	3.09667e-10	-9	1	2.26e-10	-9	1	2.53e-10	8	1	9.23333e-09	8	1	2.81667e-08	8	1	1.00333e-08	8	1	-5.2e-12	-9	1	6.93333e-09	-9	1
-8.4	2.62e-08	1	-8.4	1.655e-08	1	-8.4	-9.1e-15	1	-8.4	3.46667e-09	1	-8.4	3.7e-09	1	-8.4	-4.9e-14	1	-19.8	2.18333e-07	1	-8.4	1	3.9e-10	-8.4	1	3.53333e-10	-8.4	1	2.37667e-10	-8.4	1	2.71333e-10	8.8	1	1.04333e-08	8.8	1	2.98e-08	8.8	1	1.01333e-08	8.8	1	-5.56667e-12	-8.4	1	7.9e-09	-8.4	1
-7.8	2.955e-08	1	-7.8	1.895e-08	1	-7.8	-8.25e-15	1	-7.8	3.96667e-09	1	-7.8	4.3e-09	1	-7.8	-3.93333e-14	1	-19.1	2.32e-07	1	-7.8	1	4.46667e-10	-7.8	1	3.8e-10	-7.8	1	2.35333e-10	-7.8	1	2.90333e-10	9.6	1	1.18e-08	9.6	1	3.33e-08	9.6	1	1.32667e-08	9.6	1	-5.23333e-12	-7.8	1	9.2e-09	-7.8	1
-7.2	3.31e-08	1	-7.2	2.165e-08	1	-7.2	-5e-15	1	-7.2	4.53333e-09	1	-7.2	4.93333e-09	1	-7.2	-4.56667e-14	1	-18.4	2.46e-07	1	-7.2	1	4.9e-10	-7.2	1	4.4e-10	-7.2	1	2.46e-10	-7.2	1	3.28e-10	10.4	1	1.42667e-08	10.4	1	3.76667e-08	10.4	1	1.57e-08	10.4	1	-5.2e-12	-7.2	1	1.02667e-08	-7.2	1
-6.6	3.705e-08	1	-6.6	2.46e-08	1	-6.6	-3.455e-15	1	-6.6	5.1e-09	1	-6.6	5.7e-09	1	-6.6	-6.6e-14	1	-17.7	2.61e-07	1	-6.6	1	5.36667e-10	-6.6	1	4.76667e-10	-6.6	1	2.65667e-10	-6.6	1	3.53333e-10	11.2	1	1.61e-08	11.2	1	4.13333e-08	11.2	1	1.72333e-08	11.2	1	-5.03333e-12	-6.6	1	1.17333e-08	-6.6	1
-6	4.155e-08	1	-6	2.52e-08	1	-6	1.165e-14	1	-6	5.73333e-09	1	-6	6.46667e-09	1	-6	-5.43333e-14	1	-17	2.76333e-07	1	-6	1	6.33333e-10	-6	1	5.4e-10	-6	1	2.79333e-10	-6	1	4e-10	12	1	1.83333e-08	12	1	4.66667e-08	12	1	1.94e-08	12	1	-4.96667e-12	-6	1	1.31667e-08	-6	1
-5.4	4.65e-08	1	-5.4	2.86e-08	1	-5.4	3.255e-14	1	-5.4	6.46667e-09	1	-5.4	7.4e-09	1	-5.4	-6.76667e-14	1	-16.3	2.92667e-07	1	-5.4	1	7.03333e-10	-5.4	1	5.8e-10	-5.4	1	3.04e-10	-5.4	1	4.76667e-10	12.8	1	2.01667e-08	12.8	1	4.9e-08	12.8	1	2.3e-08	12.8	1	-4.66667e-12	-5.4	1	1.47667e-08	-5.4	1
-4.8	5.15e-08	1	-4.8	3.21e-08	1	-4.8	8.3e-14	1	-4.8	7.23333e-09	1	-4.8	8.16667e-09	1	-4.8	-6.46667e-14	1	-15.6	3.09333e-07	1	-4.8	1	7.8e-10	-4.8	1	6.46667e-10	-4.8	1	3.36667e-10	-4.8	1	5.46667e-10	13.6	1	2.28333e-08	13.6	1	5.3e-08	13.6	1	2.71e-08	13.6	1	-3.7e-12	-4.8	1	1.64e-08	-4.8	1
-4.2	5.7e-08	1	-4.2	3.57e-08	1	-4.2	1.855e-13	1	-4.2	8.06667e-09	1	-4.2	9.3e-09	1	-4.2	-5.63333e-14	1	-14.9	3.26333e-07	1	-4.2	1	8.7e-10	-4.2	1	7.1e-10	-4.2	1	3.26333e-10	-4.2	1	6.5e-10	14.4	1	2.57333e-08	14.4	1	5.83333e-08	14.4	1	3.22e-08	14.4	1	-6.43333e-13	-4.2	1	1.83667e-08	-4.2	1
-3.6	6.3e-08	1	-3.6	4.03e-08	1	-3.6	4.26e-13	1	-3.6	8.9e-09	1	-3.6	1.05e-08	1	-3.6	-8.1e-14	1	-14.2	3.43333e-07	1	-3.6	1	9.86667e-10	-3.6	1	7.63333e-10	-3.6	1	3.73333e-10	-3.6	1	7.73333e-10	15.2	1	2.83e-08	15.2	1	6.26667e-08	15.2	1	3.56667e-08	15.2	1	7.06667e-12	-3.6	1	2.05667e-08	-3.6	1
-3	7e-08	1	-3	4.465e-08	1	-3	9.35e-13	1	-3	9.9e-09	1	-3	1.16333e-08	1	-3	-5.9e-14	1	-13.5	3.63333e-07	1	-3	1	1.10667e-09	-3	1	9.06667e-10	-3	1	4.53333e-10	-3	1	9.56667e-10	16	1	3.10667e-08	16	1	6.7e-08	16	1	3.7e-08	16	1	2.48e-11	-3	1	2.28333e-08	-3	1
-2.4	7.55e-08	1	-2.4	4.95e-08	1	-2.4	1.935e-12	1	-2.4	1.08e-08	1	-2.4	1.30333e-08	1	-2.4	-6.63333e-14	1	-12.8	3.8e-07	1	-2.4	1	1.24e-09	-2.4	1	1.05e-09	-2.4	1	4.26667e-10	-2.4	1	1.14e-09	16.8	1	3.25667e-08	16.8	1	7.56667e-08	16.8	1	4.16667e-08	16.8	1	4.86667e-11	-2.4	1	2.53e-08	-2.4	1
-1.8	8.25e-08	1	-1.8	5.45e-08	1	-1.8	3.97e-12	1	-1.8	1.17667e-08	1	-1.8	1.46333e-08	1	-1.8	-4.2e-14	1	-12.1	4e-07	1	-1.8	1	1.37667e-09	-1.8	1	1.16333e-09	-1.8	1	4.56667e-10	-1.8	1	1.37333e-09	17.6	1	3.66667e-08	17.6	1	7.8e-08	17.6	1	4.9e-08	17.6	1	8.53333e-11	-1.8	1	2.76667e-08	-1.8	1
-1.2	8.95e-08	1	-1.2	6e-08	1	-1.2	7.4e-12	1	-1.2	1.28e-08	1	-1.2	1.62667e-08	1	-1.2	-5.46667e-14	1	-11.4	4.2e-07	1	-1.2	1	1.52e-09	-1.2	1	1.28333e-09	-1.2	1	5.46667e-10	-1.2	1	1.63333e-09	18.4	1	3.93333e-08	18.4	1	8.56667e-08	18.4	1	5.4e-08	18.4	1	1.49e-10	-1.2	1	3.04333e-08	-1.2	1
-0.6	9.65e-08	1	-0.6	6.55e-08	1	-0.6	1.29e-11	1	-0.6	1.38667e-08	1	-0.6	1.8e-08	1	-0.6	-6.66667e-14	1	-10.7	4.4e-07	1	-0.6	1	1.68e-09	-0.6	1	1.41667e-09	-0.6	1	6.16667e-10	-0.6	1	1.93333e-09	19.2	1	4.3e-08	19.2	1	9.1e-08	19.2	1	6.43333e-08	19.2	1	2.42333e-10	-0.6	1	3.4e-08	-0.6	1
0	1.04e-07	1	0	7.2e-08	1	0	2.095e-11	1	0	1.53e-08	1	0	1.99333e-08	1	0	-8.3e-14	1	-10	4.63333e-07	1	0	1	1.95e-09	0	1	1.55333e-09	0	1	5.93333e-10	0	1	2.27333e-09	20	1	4.66667e-08	20	1	1.01333e-07	20	1	6.73333e-08	20	1	3.63333e-10	0	1	3.8e-08	0	1
0.6	1.12e-07	1	0.6	7.8e-08	1	0.6	2.945e-11	1	0.6	1.59e-08	1	0.6	2.21333e-08	1	0.6	-5.86667e-14	1	-9.3	4.86667e-07	1	0.6	1	2.00333e-09	0.6	1	1.74667e-09	0.6	1	5.96667e-10	0.6	1	2.81667e-09	20.8	1	5.23333e-08	20.8	1	1.08e-07	20.8	1	7.1e-08	20.8	1	5.7e-10	0.6	1	4.13333e-08	0.6	1
1.2	1.21e-07	1	1.2	8.55e-08	1	1.2	5.1e-11	1	1.2	1.6e-08	1	1.2	2.42667e-08	1	1.2	-8.23333e-14	1	-8.6	5.1e-07	1	1.2	1	2.32667e-09	1.2	1	2.01e-09	1.2	1	7.46667e-10	1.2	1	3.4e-09	21.6	1	5.63333e-08	21.6	1	1.12667e-07	21.6	1	8.2e-08	21.6	1	7.56667e-10	1.2	1	4.33333e-08	1.2	1
1.8	1.305e-07	1	1.8	9.2e-08	1	1.8	7.95e-11	1	1.8	1.73667e-08	1	1.8	2.64e-08	1	1.8	-4.96667e-14	1	-7.9	5.33333e-07	1	1.8	1	2.42667e-09	1.8	1	2.20667e-09	1.8	1	8.56667e-10	1.8	1	4.06667e-09	22.4	1	6.2e-08	22.4	1	1.20667e-07	22.4	1	8.83333e-08	22.4	1	9.93333e-10	1.8	1	4.5e-08	1.8	1
2.4	1.41e-07	1	2.4	9.95e-08	1	2.4	1.15e-10	1	2.4	1.87e-08	1	2.4	2.86667e-08	1	2.4	-8.3e-14	1	-7.2	5.56667e-07	1	2.4	1	2.72667e-09	2.4	1	2.28333e-09	2.4	1	8.56667e-10	2.4	1	4.96667e-09	23.2	1	6.76667e-08	23.2	1	1.27e-07	23.2	1	9.7e-08	23.2	1	1.26e-09	2.4	1	4.63333e-08	2.4	1
3	1.53e-07	1	3	1.065e-07	1	3	1.585e-10	1	3	2.03333e-08	1	3	3.13667e-08	1	3	-8.23333e-14	1	-6.5	5.83333e-07	1	3	1	3.01333e-09	3	1	2.71333e-09	3	1	9.4e-10	3	1	6.03333e-09	24	1	7.3e-08	24	1	1.34667e-07	24	1	1.03667e-07	24	1	1.5e-09	3	1	4.73333e-08	3	1
3.6	1.625e-07	1	3.6	1.14e-07	1	3.6	2.12e-10	1	3.6	2.15333e-08	1	3.6	3.4e-08	1	3.6	-5.63333e-14	1	-5.8	6.1e-07	1	3.6	1	3.43333e-09	3.6	1	3.09667e-09	3.6	1	1.00333e-09	3.6	1	7.4e-09	24.8	1	7.83333e-08	24.8	1	1.38667e-07	24.8	1	1.15333e-07	24.8	1	1.8e-09	3.6	1	4.83333e-08	3.6	1
4.2	1.73e-07	1	4.2	1.25e-07	1	4.2	2.6e-10	1	4.2	2.23e-08	1	4.2	3.66667e-08	1	4.2	-9.23333e-14	1	-5.1	6.36667e-07	1	4.2	1	3.66667e-09	4.2	1	3.33333e-09	4.2	1	1.18667e-09	4.2	1	8.8e-09	25.6	1	8.2e-08	25.6	1	1.50333e-07	25.6	1	1.18333e-07	25.6	1	2.12667e-09	4.2	1	4.9e-08	4.2	1
4.8	1.85e-07	1	4.8	1.35e-07	1	4.8	3.41e-10	1	4.8	2.38e-08	1	4.8	3.96667e-08	1	4.8	-9.16667e-14	1	-4.4	6.63333e-07	1	4.8	1	3.93333e-09	4.8	1	3.5e-09	4.8	1	1.30667e-09	4.8	1	1.05667e-08	26.4	1	9e-08	26.4	1	1.58333e-07	26.4	1	1.34333e-07	26.4	1	2.48667e-09	4.8	1	5e-08	4.8	1
5.4	1.96e-07	1	5.4	1.445e-07	1	5.4	4.34e-10	1	5.4	2.58e-08	1	5.4	4.3e-08	1	5.4	-6.5e-14	1	-3.7	6.9e-07	1	5.4	1	4.36667e-09	5.4	1	3.8e-09	5.4	1	1.39e-09	5.4	1	1.23e-08	27.2	1	9.6e-08	27.2	1	1.65667e-07	27.2	1	1.47e-07	27.2	1	2.85667e-09	5.4	1	5.1e-08	5.4	1
6	2.08e-07	1	6	1.545e-07	1	6	5.35e-10	1	6	2.71667e-08	1	6	4.7e-08	1	6	-8.3e-14	1	-3	7.2e-07	1	6	1	4.76667e-09	6	1	4.06667e-09	6	1	1.61e-09	6	1	1.41667e-08	28	1	1.02e-07	28	1	1.70667e-07	28	1	1.60667e-07	28	1	3.27e-09	6	1	5.16667e-08	6	1
6.6	2.205e-07	1	6.6	1.66e-07	1	6.6	6.45e-10	1	6.6	2.84e-08	1	6.6	5.06667e-08	1	6.6	-7.73333e-14	1	-2.3	7.5e-07	1	6.6	1	5.4e-09	6.6	1	4.6e-09	6.6	1	1.71e-09	6.6	1	1.63333e-08	28.8	1	1.09667e-07	28.8	1	1.84e-07	28.8	1	1.72e-07	28.8	1	3.73333e-09	6.6	1	5.2e-08	6.6	1
7.2	2.34e-07	1	7.2	1.75e-07	1	7.2	7.75e-10	1	7.2	3.02e-08	1	7.2	5.4e-08	1	7.2	-8.6e-14	1	-1.6	7.8e-07	1	7.2	1	5.73333e-09	7.2	1	5.03333e-09	7.2	1	1.86333e-09	7.2	1	1.87667e-08	29.6	1	1.15667e-07	29.6	1	1.90333e-07	29.6	1	1.79667e-07	29.6	1	4.26667e-09	7.2	1	5.3e-08	7.2	1
7.8	2.47e-07	1	7.8	1.88e-07	1	7.8	9e-10	1	7.8	3.24e-08	1	7.8	5.83333e-08	1	7.8	-4.6e-14	1	-0.9	8.1e-07	1	7.8	1	6.2e-09	7.8	1	5.7e-09	7.8	1	2.09333e-09	7.8	1	2.14667e-08	30.4	1	1.25333e-07	30.4	1	1.96333e-07	30.4	1	1.89e-07	30.4	1	4.76667e-09	7.8	1	5.36667e-08	7.8	1
8.4	2.535e-07	1	8.4	2e-07	1	8.4	1.04e-09	1	8.4	3.36667e-08	1	8.4	6.26667e-08	1	8.4	-8.6e-14	1	-0.2	8.4e-07	1	8.4	1	6.76667e-09	8.4	1	5.9e-09	8.4	1	2.22e-09	8.4	1	2.46667e-08	31.2	1	1.29667e-07	31.2	1	1.97333e-07	31.2	1	2e-07	31.2	1	5.33333e-09	8.4	1	5.43333e-08	8.4	1
9	2.695e-07	1	9	2.14e-07	1	9	1.195e-09	1	9	3.53333e-08	1	9	6.7e-08	1	9	-1.11e-13	1	0.5	8.73333e-07	1	9	1	7.33333e-09	9	1	6.3e-09	9	1	2.68667e-09	9	1	2.74333e-08	32	1	1.36e-07	32	1	2.07667e-07	32	1	2.11333e-07	32	1	5.96667e-09	9	1	5.5e-08	9	1
9.6	2.83e-07	1	9.6	2.25e-07	1	9.6	1.365e-09	1	9.6	3.63333e-08	1	9.6	7.13333e-08	1	9.6	-9.83333e-14	1	1.2	9.06667e-07	1	9.6	1	7.83333e-09	9.6	1	6.9e-09	9.6	1	2.93667e-09	9.6	1	3.12333e-08	32.8	1	1.45333e-07	32.8	1	2.17333e-07	32.8	1	2.16667e-07	32.8	1	6.5e-09	9.6	1	5.56667e-08	9.6	1
10.2	2.98e-07	1	10.2	2.395e-07	1	10.2	1.57e-09	1	10.2	3.83333e-08	1	10.2	7.6e-08	1	10.2	-1.14667e-13	1	1.9	9.4e-07	1	10.2	1	8.6e-09	10.2	1	7.46667e-09	10.2	1	3.24e-09	10.2	1	3.43333e-08	33.6	1	1.50333e-07	33.6	1	2.33333e-07	33.6	1	2.27667e-07	33.6	1	7.23333e-09	10.2	1	5.63333e-08	10.2	1
10.8	3.12e-07	1	10.8	2.42e-07	1	10.8	1.76e-09	1	10.8	4.16667e-08	1	10.8	8.1e-08	1	10.8	-8.26667e-14	1	2.6	9.73333e-07	1	10.8	1	9.1e-09	10.8	1	8.2e-09	10.8	1	3.63333e-09	10.8	1	3.83333e-08	34.4	1	1.57667e-07	34.4	1	2.34667e-07	34.4	1	2.47667e-07	34.4	1	7.76667e-09	10.8	1	5.7e-08	10.8	1
11.4	3.265e-07	1	11.4	2.575e-07	1	11.4	1.965e-09	1	11.4	4.33333e-08	1	11.4	8.56667e-08	1	11.4	-1.21e-13	1	3.3	1.01e-06	1	11.4	1	9.86667e-09	11.4	1	8.76667e-09	11.4	1	3.9e-09	11.4	1	4.23333e-08	35.2	1	1.7e-07	35.2	1	2.45e-07	35.2	1	2.72333e-07	35.2	1	8.5e-09	11.4	1	5.9e-08	11.4	1
12	3.43e-07	1	12	2.725e-07	1	12	2.22e-09	1	12	4.46667e-08	1	12	9.1e-08	1	12	-1.14333e-13	1	4	1.04667e-06	1	12	1	1.09e-08	12	1	9.9e-09	12	1	4.26667e-09	12	1	4.7e-08	36	1	1.81333e-07	36	1	2.5e-07	36	1	2.82333e-07	36	1	9.23333e-09	12	1	6.03333e-08	12	1
12.6	3.595e-07	1	12.6	2.9e-07	1	12.6	2.465e-09	1	12.6	4.6e-08	1	12.6	9.6e-08	1	12.6	-1.03e-13	1	4.7	1.08333e-06	1	12.6	1	1.16667e-08	12.6	1	1.07333e-08	12.6	1	4.5e-09	12.6	1	5.16667e-08	36.8	1	1.89333e-07	36.8	1	2.64667e-07	36.8	1	2.90667e-07	36.8	1	1.02333e-08	12.6	1	6.06667e-08	12.6	1
13.2	3.76e-07	1	13.2	3.065e-07	1	13.2	2.645e-09	1	13.2	4.83333e-08	1	13.2	1.02333e-07	1	13.2	-1.12333e-13	1	5.4	1.12e-06	1	13.2	1	1.24667e-08	13.2	1	1.13667e-08	13.2	1	5.23333e-09	13.2	1	5.66667e-08	37.6	1	1.95667e-07	37.6	1	2.79e-07	37.6	1	3.06667e-07	37.6	1	1.12333e-08	13.2	1	6.13333e-08	13.2	1
13.8	3.885e-07	1	13.8	3.23e-07	1	13.8	2.93e-09	1	13.8	5.03333e-08	1	13.8	1.07667e-07	1	13.8	-1.10333e-13	1	6.1	1.15667e-06	1	13.8	1	1.35e-08	13.8	1	1.19e-08	13.8	1	5.53333e-09	13.8	1	6.16667e-08	38.4	1	2.06333e-07	38.4	1	2.87333e-07	38.4	1	3.33333e-07	38.4	1	1.22667e-08	13.8	1	6.3e-08	13.8	1
14.4	4.06e-07	1	14.4	3.41e-07	1	14.4	3.255e-09	1	14.4	5.2e-08	1	14.4	1.13667e-07	1	14.4	-1.03e-13	1	6.8	1.2e-06	1	14.4	1	1.48333e-08	14.4	1	1.29667e-08	14.4	1	6.13333e-09	14.4	1	6.7e-08	39.2	1	2.16333e-07	39.2	1	2.94333e-07	39.2	1	3.33333e-07	39.2	1	1.33667e-08	14.4	1	6.43333e-08	14.4	1
15	4.25e-07	1	15	3.605e-07	1	15	3.58e-09	1	15	5.5e-08	1	15	1.21e-07	1	15	-1.42667e-13	1	7.5	1.23667e-06	1	15	1	1.56667e-08	15	1	1.32e-08	15	1	6.46667e-09	15	1	7.33333e-08	40	1	2.24667e-07	40	1	3.04333e-07	40	1	3.66667e-07	40	1	1.46333e-08	15	1	6.53333e-08	15	1
15.6	4.41e-07	1	15.6	3.785e-07	1	15.6	3.895e-09	1	15.6	5.36667e-08	1	15.6	1.27667e-07	1	15.6	-1.37667e-13	1	8.2	1.27667e-06	1	15.6	1	1.67e-08	15.6	1	1.40333e-08	15.6	1	7.43333e-09	15.6	1	7.86667e-08	40.8	1	2.35667e-07	40.8	1	3.11333e-07	40.8	1	3.86667e-07	40.8	1	1.55e-08	15.6	1	6.6e-08	15.6	1
16.2	4.59e-07	1	16.2	3.97e-07	1	16.2	4.245e-09	1	16.2	5.8e-08	1	16.2	1.33667e-07	1	16.2	-8.23333e-14	1	8.9	1.31667e-06	1	16.2	1	1.80333e-08	16.2	1	1.46333e-08	16.2	1	7.56667e-09	16.2	1	8.56667e-08	41.6	1	2.46e-07	41.6	1	3.25333e-07	41.6	1	4.03333e-07	41.6	1	1.67667e-08	16.2	1	6.66667e-08	16.2	1
16.8	4.775e-07	1	16.8	4.18e-07	1	16.8	4.665e-09	1	16.8	5.96667e-08	1	16.8	1.41e-07	1	16.8	3.13333e-14	1	9.6	1.36e-06	1	16.8	1	1.90667e-08	16.8	1	1.63e-08	16.8	1	8.56667e-09	16.8	1	9.3e-08	42.4	1	2.52333e-07	42.4	1	3.43333e-07	42.4	1	4.26667e-07	42.4	1	1.79667e-08	16.8	1	6.86667e-08	16.8	1
17.4	4.96e-07	1	17.4	4.39e-07	1	17.4	5.05e-09	1	17.4	6.13333e-08	1	17.4	1.48e-07	1	17.4	4.53333e-13	1	10.3	1.4e-06	1	17.4	1	2.06667e-08	17.4	1	1.79333e-08	17.4	1	9.8e-09	17.4	1	9.93333e-08	43.2	1	2.62e-07	43.2	1	3.5e-07	43.2	1	4.43333e-07	43.2	1	1.89e-08	17.4	1	7e-08	17.4	1
18	5.15e-07	1	18	4.595e-07	1	18	5.4e-09	1	18	6.43333e-08	1	18	1.54e-07	1	18	1.79e-12	1	11	1.44333e-06	1	18	1	2.16e-08	18	1	2.04e-08	18	1	1.09e-08	18	1	1.06e-07	44	1	2.71333e-07	44	1	3.66667e-07	44	1	4.6e-07	44	1	2.01333e-08	18	1	7.16667e-08	18	1
18.6	5.3e-07	1	18.6	4.835e-07	1	18.6	5.85e-09	1	18.6	6.73333e-08	1	18.6	1.61333e-07	1	18.6	5.83333e-12	1	11.7	1.48667e-06	1	18.6	1	2.34333e-08	18.6	1	2.17333e-08	18.6	1	1.1e-08	18.6	1	1.14e-07	44.8	1	2.85333e-07	44.8	1	3.66667e-07	44.8	1	4.76667e-07	44.8	1	2.12667e-08	18.6	1	7.26667e-08	18.6	1
19.2	5.5e-07	1	19.2	5.05e-07	1	19.2	6.4e-09	1	19.2	7e-08	1	19.2	1.69333e-07	1	19.2	1.5e-11	1	12.4	1.53e-06	1	19.2	1	2.5e-08	19.2	1	2.32333e-08	19.2	1	1.32e-08	19.2	1	1.22333e-07	45.6	1	2.94333e-07	45.6	1	3.86667e-07	45.6	1	5.03333e-07	45.6	1	2.27667e-08	19.2	1	7.36667e-08	19.2	1
19.8	5.75e-07	1	19.8	5.3e-07	1	19.8	6.9e-09	1	19.8	7.3e-08	1	19.8	1.77667e-07	1	19.8	3.56667e-11	1	13.1	1.57667e-06	1	19.8	1	2.70667e-08	19.8	1	2.52667e-08	19.8	1	1.5e-08	19.8	1	1.3e-07	46.4	1	3.04333e-07	46.4	1	3.96667e-07	46.4	1	5.2e-07	46.4	1	2.39667e-08	19.8	1	7.5e-08	19.8	1
20.4	5.95e-07	1	20.4	5.5e-07	1	20.4	7.3e-09	1	20.4	7.3e-08	1	20.4	1.87e-07	1	20.4	7.73333e-11	1	13.8	1.62333e-06	1	20.4	1	2.90667e-08	20.4	1	2.52333e-08	20.4	1	1.57e-08	20.4	1	1.39e-07	47.2	1	3.19333e-07	47.2	1	4.06667e-07	47.2	1	5.33333e-07	47.2	1	2.54333e-08	20.4	1	7.6e-08	20.4	1
21	6.15e-07	1	21	5.75e-07	1	21	7.95e-09	1	21	7.73333e-08	1	21	1.95e-07	1	21	1.46e-10	1	14.5	1.66667e-06	1	21	1	3.05e-08	21	1	2.55333e-08	21	1	1.69e-08	21	1	1.48e-07	48	1	3.3e-07	48	1	4.2e-07	48	1	5.4e-07	48	1	2.57667e-08	21	1	7.63333e-08	21	1
21.6	6.35e-07	1	21.6	6e-07	1	21.6	8.45e-09	1	21.6	7.9e-08	1	21.6	2.05e-07	1	21.6	2.6e-10	1	15.2	1.71333e-06	1	21.6	1	3.15333e-08	21.6	1	2.62667e-08	21.6	1	1.76667e-08	21.6	1	1.58333e-07	48.8	1	3.4e-07	48.8	1	4.3e-07	48.8	1	5.66667e-07	48.8	1	2.71667e-08	21.6	1	7.76667e-08	21.6	1
22.2	6.5e-07	1	22.2	6.25e-07	1	22.2	8.95e-09	1	22.2	8.1e-08	1	22.2	2.13333e-07	1	22.2	3.86667e-10	1	15.9	1.76333e-06	1	22.2	1	3.43333e-08	22.2	1	2.76333e-08	22.2	1	1.8e-08	22.2	1	1.65667e-07	49.6	1	3.53333e-07	49.6	1	4.5e-07	49.6	1	5.93333e-07	49.6	1	2.84333e-08	22.2	1	7.76667e-08	22.2	1
22.8	6.7e-07	1	22.8	6.45e-07	1	22.8	9.6e-09	1	22.8	8.56667e-08	1	22.8	2.22e-07	1	22.8	6.06667e-10	1	16.6	1.81e-06	1	22.8	1	3.76667e-08	22.8	1	2.95333e-08	22.8	1	2.02333e-08	22.8	1	1.75e-07	50.4	1	3.63333e-07	50.4	1	4.53333e-07	50.4	1	6.16667e-07	50.4	1	2.95667e-08	22.8	1	7.86667e-08	22.8	1
23.4	6.9e-07	1	23.4	6.75e-07	1	23.4	1.025e-08	1	23.4	8.43333e-08	1	23.4	2.31667e-07	1	23.4	8.73333e-10	1	17.3	1.86333e-06	1	23.4	1	3.96667e-08	23.4	1	3.07333e-08	23.4	1	2.15667e-08	23.4	1	1.85e-07	51.2	1	3.66667e-07	51.2	1	4.63333e-07	51.2	1	6.43333e-07	51.2	1	3.12333e-08	23.4	1	8.1e-08	23.4	1
24	7.15e-07	1	24	7e-07	1	24	1.095e-08	1	24	9.03333e-08	1	24	2.42333e-07	1	24	1.25e-09	1	18	1.91e-06	1	24	1	4.33333e-08	24	1	3.33333e-08	24	1	2.17667e-08	24	1	1.96333e-07	52	1	3.8e-07	52	1	4.8e-07	52	1	6.7e-07	52	1	3.26e-08	24	1	8.26667e-08	24	1
24.6	7.35e-07	1	24.6	7.2e-07	1	24.6	1.16e-08	1	24.6	9.2e-08	1	24.6	2.51333e-07	1	24.6	1.65667e-09	1	18.7	1.96e-06	1	24.6	1	4.53333e-08	24.6	1	3.63333e-08	24.6	1	2.34333e-08	24.6	1	2.09e-07	52.8	1	3.93333e-07	52.8	1	4.8e-07	52.8	1	6.93333e-07	52.8	1	3.4e-08	24.6	1	8.46667e-08	24.6	1
25.2	7.55e-07	1	25.2	7.5e-07	1	25.2	1.25e-08	1	25.2	9.7e-08	1	25.2	2.61333e-07	1	25.2	2.16333e-09	1	19.4	2.00667e-06	1	25.2	1	4.8e-08	25.2	1	3.8e-08	25.2	1	2.5e-08	25.2	1	2.18333e-07	53.6	1	4.1e-07	53.6	1	4.83333e-07	53.6	1	7.06667e-07	53.6	1	3.53333e-08	25.2	1	8.63333e-08	25.2	1
25.8	7.8e-07	1	25.8	7.8e-07	1	25.8	1.305e-08	1	25.8	9.76667e-08	1	25.8	2.71333e-07	1	25.8	2.72333e-09	1	20.1	2.06e-06	1	25.8	1	5.13333e-08	25.8	1	4.06667e-08	25.8	1	2.68333e-08	25.8	1	2.29333e-07	54.4	1	4.23333e-07	54.4	1	5.03333e-07	54.4	1	7.5e-07	54.4	1	3.8e-08	25.8	1	8.76667e-08	25.8	1
26.4	8e-07	1	26.4	8.05e-07	1	26.4	1.365e-08	1	26.4	9.76667e-08	1	26.4	2.81e-07	1	26.4	3.36667e-09	1	20.8	2.11333e-06	1	26.4	1	5.4e-08	26.4	1	4.36667e-08	26.4	1	3.05667e-08	26.4	1	2.44e-07	55.2	1	4.3e-07	55.2	1	5.26667e-07	55.2	1	7.66667e-07	55.2	1	3.86667e-08	26.4	1	8.9e-08	26.4	1
27	8.2e-07	1	27	8.35e-07	1	27	1.435e-08	1	27	1.01333e-07	1	27	2.92e-07	1	27	4.03333e-09	1	21.5	2.16667e-06	1	27	1	5.56667e-08	27	1	4.53333e-08	27	1	3.26667e-08	27	1	2.54667e-07	56	1	4.43333e-07	56	1	5.36667e-07	56	1	7.56667e-07	56	1	4e-08	27	1	9e-08	27	1
27.6	8.35e-07	1	27.6	8.65e-07	1	27.6	1.525e-08	1	27.6	1.07e-07	1	27.6	3.05e-07	1	27.6	4.83333e-09	1	22.2	2.22333e-06	1	27.6	1	5.73333e-08	27.6	1	4.8e-08	27.6	1	3.29667e-08	27.6	1	2.69e-07	56.8	1	4.6e-07	56.8	1	5.46667e-07	56.8	1	7.96667e-07	56.8	1	4.2e-08	27.6	1	9.06667e-08	27.6	1
28.2	8.65e-07	1	28.2	8.95e-07	1	28.2	1.6e-08	1	28.2	1.12333e-07	1	28.2	3.15667e-07	1	28.2	5.66667e-09	1	22.9	2.27667e-06	1	28.2	1	6.1e-08	28.2	1	4.9e-08	28.2	1	3.73333e-08	28.2	1	2.83e-07	57.6	1	4.7e-07	57.6	1	5.63333e-07	57.6	1	8.4e-07	57.6	1	4.36667e-08	28.2	1	9.23333e-08	28.2	1
28.8	8.8e-07	1	28.8	9.2e-07	1	28.8	1.685e-08	1	28.8	1.1e-07	1	28.8	3.28e-07	1	28.8	6.7e-09	1	23.6	2.33333e-06	1	28.8	1	6.43333e-08	28.8	1	5.06667e-08	28.8	1	3.83333e-08	28.8	1	2.95667e-07	58.4	1	4.93333e-07	58.4	1	5.83333e-07	58.4	1	8.4e-07	58.4	1	4.4e-08	28.8	1	9.33333e-08	28.8	1
29.4	9e-07	1	29.4	9.5e-07	1	29.4	1.76e-08	1	29.4	1.13e-07	1	29.4	3.4e-07	1	29.4	7.86667e-09	1	24.3	2.38333e-06	1	29.4	1	6.83333e-08	29.4	1	5.4e-08	29.4	1	3.96667e-08	29.4	1	3.08e-07	59.2	1	5.06667e-07	59.2	1	5.86667e-07	59.2	1	8.3e-07	59.2	1	4.56667e-08	29.4	1	9.43333e-08	29.4	1
30	9.25e-07	1	30	9.85e-07	1	30	1.84e-08	1	30	1.15e-07	1	30	3.53333e-07	1	30	8.93333e-09	1	25	2.44333e-06	1	30	1	6.96667e-08	30	1	5.66667e-08	30	1	4.26667e-08	30	1	3.20667e-07	60	1	5.16667e-07	60	1	6.03333e-07	60	1	8.96667e-07	60	1	4.73333e-08	30	1	9.76667e-08	30	1
30.6	9.55e-07	1	30.6	1.01e-06	1	30.6	1.94e-08	1	30.6	1.21e-07	1	30.6	3.63333e-07	1	30.6	1.03333e-08	1	25.7	2.5e-06	1	30.6	1	7.43333e-08	30.6	1	6.2e-08	30.6	1	4.63333e-08	30.6	1	3.33333e-07	60	1	5.1e-07	60	1	6e-07	60	1	9.26667e-07	60	1	4.7e-08	30.6	1	1.03667e-07	30.6	1
31.2	9.75e-07	1	31.2	1.045e-06	1	31.2	2.03e-08	1	31.2	1.23e-07	1	31.2	3.73333e-07	1	31.2	1.15e-08	1	26.4	2.55667e-06	1	31.2	1	7.83333e-08	31.2	1	6.53333e-08	31.2	1	4.96667e-08	31.2	1	3.5e-07	59.2	1	4.86667e-07	59.2	1	5.8e-07	59.2	1	8.93333e-07	59.2	1	4.83333e-08	31.2	1	1.06667e-07	31.2	1
31.8	1e-06	1	31.8	1.08e-06	1	31.8	2.115e-08	1	31.8	1.25667e-07	1	31.8	3.86667e-07	1	31.8	1.26333e-08	1	27.1	2.61333e-06	1	31.8	1	8.26667e-08	31.8	1	6.73333e-08	31.8	1	5.16667e-08	31.8	1	3.63333e-07	58.4	1	4.56667e-07	58.4	1	5.5e-07	58.4	1	8.7e-07	58.4	1	5e-08	31.8	1	1.08333e-07	31.8	1
32.4	1.025e-06	1	32.4	1.11e-06	1	32.4	2.245e-08	1	32.4	1.28333e-07	1	32.4	3.96667e-07	1	32.4	1.42333e-08	1	27.8	2.67e-06	1	32.4	1	8.63333e-08	32.4	1	7.23333e-08	32.4	1	5.36667e-08	32.4	1	3.8e-07	57.6	1	4.26667e-07	57.6	1	5.4e-07	57.6	1	8.43333e-07	57.6	1	4.96667e-08	32.4	1	1.11e-07	32.4	1
33	1.05e-06	1	33	1.145e-06	1	33	2.33e-08	1	33	1.31667e-07	1	33	4.13333e-07	1	33	1.56e-08	1	28.5	2.72667e-06	1	33	1	9.16667e-08	33	1	7.46667e-08	33	1	5.66667e-08	33	1	3.93333e-07	56.8	1	4.03333e-07	56.8	1	5.2e-07	56.8	1	8.13333e-07	56.8	1	5.06667e-08	33	1	1.13667e-07	33	1
33.6	1.08e-06	1	33.6	1.175e-06	1	33.6	2.41e-08	1	33.6	1.35333e-07	1	33.6	4.26667e-07	1	33.6	1.74667e-08	1	29.2	2.79e-06	1	33.6	1	9.6e-08	33.6	1	7.8e-08	33.6	1	6.23333e-08	33.6	1	4.1e-07	56	1	3.83333e-07	56	1	5.03333e-07	56	1	7.9e-07	56	1	5e-08	33.6	1	1.16e-07	33.6	1
34.2	1.1e-06	1	34.2	1.21e-06	1	34.2	2.48e-08	1	34.2	1.41333e-07	1	34.2	4.4e-07	1	34.2	1.86e-08	1	29.9	2.85e-06	1	34.2	1	1e-07	34.2	1	8.26667e-08	34.2	1	6.6e-08	34.2	1	4.26667e-07	55.2	1	3.63333e-07	55.2	1	4.76667e-07	55.2	1	7.6e-07	55.2	1	4.9e-08	34.2	1	1.16667e-07	34.2	1
34.8	1.13e-06	1	34.8	1.245e-06	1	34.8	2.55e-08	1	34.8	1.41667e-07	1	34.8	4.53333e-07	1	34.8	2.00667e-08	1	30.6	2.91333e-06	1	34.8	1	1.08333e-07	34.8	1	8.56667e-08	34.8	1	6.93333e-08	34.8	1	4.46667e-07	54.4	1	3.46667e-07	54.4	1	4.63333e-07	54.4	1	7.36667e-07	54.4	1	4.86667e-08	34.8	1	1.21e-07	34.8	1
35.4	1.15e-06	1	35.4	1.28e-06	1	35.4	2.645e-08	1	35.4	1.41667e-07	1	35.4	4.66667e-07	1	35.4	2.14333e-08	1	31.3	2.97e-06	1	35.4	1	1.13333e-07	35.4	1	8.8e-08	35.4	1	7.46667e-08	35.4	1	4.6e-07	53.6	1	3.3e-07	53.6	1	4.5e-07	53.6	1	7.26667e-07	53.6	1	4.86667e-08	35.4	1	1.23e-07	35.4	1
36	1.18e-06	1	36	1.32e-06	1	36	2.735e-08	1	36	1.43333e-07	1	36	4.8e-07	1	36	2.41667e-08	1	32	3.04e-06	1	36	1	1.20667e-07	36	1	9.23333e-08	36	1	8.03333e-08	36	1	4.76667e-07	52.8	1	3.13e-07	52.8	1	4.43333e-07	52.8	1	7.06667e-07	52.8	1	4.83333e-08	36	1	1.27667e-07	36	1
36.6	1.205e-06	1	36.6	1.355e-06	1	36.6	2.845e-08	1	36.6	1.44333e-07	1	36.6	4.96667e-07	1	36.6	2.61667e-08	1	32.7	3.1e-06	1	36.6	1	1.27e-07	36.6	1	9.7e-08	36.6	1	8.33333e-08	36.6	1	5e-07	52	1	3.00333e-07	52	1	4.3e-07	52	1	7e-07	52	1	4.76667e-08	36.6	1	1.31667e-07	36.6	1
37.2	1.23e-06	1	37.2	1.39e-06	1	37.2	2.96e-08	1	37.2	1.47333e-07	1	37.2	5.06667e-07	1	37.2	2.74667e-08	1	33.4	3.17e-06	1	37.2	1	1.29667e-07	37.2	1	1.02e-07	37.2	1	8.76667e-08	37.2	1	5.2e-07	51.2	1	2.82e-07	51.2	1	4.1e-07	51.2	1	6.63333e-07	51.2	1	4.7e-08	37.2	1	1.37e-07	37.2	1
37.8	1.25e-06	1	37.8	1.43e-06	1	37.8	3.08e-08	1	37.8	1.46333e-07	1	37.8	5.26667e-07	1	37.8	3.01667e-08	1	34.1	3.23333e-06	1	37.8	1	1.37e-07	37.8	1	1.07e-07	37.8	1	9.53333e-08	37.8	1	5.4e-07	50.4	1	2.60667e-07	50.4	1	4e-07	50.4	1	6.2e-07	50.4	1	4.73333e-08	37.8	1	1.53e-07	37.8	1
38.4	1.275e-06	1	38.4	1.465e-06	1	38.4	3.165e-08	1	38.4	1.52667e-07	1	38.4	5.4e-07	1	38.4	3.2e-08	1	34.8	3.3e-06	1	38.4	1	1.40667e-07	38.4	1	1.10333e-07	38.4	1	9.46667e-08	38.4	1	5.53333e-07	49.6	1	2.43e-07	49.6	1	3.8e-07	49.6	1	5.8e-07	49.6	1	4.7e-08	38.4	1	1.62333e-07	38.4	1
39	1.305e-06	1	39	1.505e-06	1	39	3.285e-08	1	39	1.52667e-07	1	39	5.53333e-07	1	39	3.53333e-08	1	35.5	3.36667e-06	1	39	1	1.47333e-07	39	1	1.15667e-07	39	1	1.01667e-07	39	1	5.73333e-07	48.8	1	2.24333e-07	48.8	1	3.66667e-07	48.8	1	5.33333e-07	48.8	1	4.56667e-08	39	1	1.70667e-07	39	1
39.6	1.32e-06	1	39.6	1.54e-06	1	39.6	3.37e-08	1	39.6	1.53e-07	1	39.6	5.7e-07	1	39.6	3.66667e-08	1	36.2	3.43333e-06	1	39.6	1	1.54667e-07	39.6	1	1.17e-07	39.6	1	1.02333e-07	39.6	1	5.93333e-07	48	1	2.06667e-07	48	1	3.5e-07	48	1	5.03333e-07	48	1	4.46667e-08	39.6	1	1.80667e-07	39.6	1
40.2	1.345e-06	1	40.2	1.58e-06	1	40.2	3.495e-08	1	40.2	1.54667e-07	1	40.2	5.86667e-07	1	40.2	3.9e-08	1	36.9	3.5e-06	1	40.2	1	1.55333e-07	40.2	1	1.26667e-07	40.2	1	1.10667e-07	40.2	1	6.13333e-07	47.2	1	1.87333e-07	47.2	1	3.31e-07	47.2	1	4.7e-07	47.2	1	4.46667e-08	40.2	1	1.90333e-07	40.2	1
40.8	1.375e-06	1	40.8	1.62e-06	1	40.8	3.685e-08	1	40.8	1.57333e-07	1	40.8	6.03333e-07	1	40.8	4.4e-08	1	37.6	3.56667e-06	1	40.8	1	1.69e-07	40.8	1	1.29333e-07	40.8	1	1.14667e-07	40.8	1	6.33333e-07	46.4	1	1.72667e-07	46.4	1	3.13667e-07	46.4	1	4.5e-07	46.4	1	4.46667e-08	40.8	1	1.99667e-07	40.8	1
41.4	1.4e-06	1	41.4	1.655e-06	1	41.4	3.73e-08	1	41.4	1.67667e-07	1	41.4	6.16667e-07	1	41.4	4.43333e-08	1	38.3	3.63333e-06	1	41.4	1	1.71333e-07	41.4	1	1.34667e-07	41.4	1	1.21333e-07	41.4	1	6.56667e-07	45.6	1	1.53667e-07	45.6	1	3.02333e-07	45.6	1	4.2e-07	45.6	1	4.36667e-08	41.4	1	2.05667e-07	41.4	1
42	1.44e-06	1	42	1.695e-06	1	42	3.85e-08	1	42	1.7e-07	1	42	6.33333e-07	1	42	4.66667e-08	1	39	3.7e-06	1	42	1	1.77333e-07	42	1	1.40667e-07	42	1	1.23333e-07	42	1	6.76667e-07	44.8	1	1.38333e-07	44.8	1	2.93e-07	44.8	1	4.03333e-07	44.8	1	4.33333e-08	42	1	2.08667e-07	42	1
42.6	1.465e-06	1	42.6	1.735e-06	1	42.6	3.945e-08	1	42.6	1.73667e-07	1	42.6	6.5e-07	1	42.6	5.13333e-08	1	39.7	3.76667e-06	1	42.6	1	1.83e-07	42.6	1	1.41333e-07	42.6	1	1.28e-07	42.6	1	6.96667e-07	44	1	1.23667e-07	44	1	2.81e-07	44	1	3.73333e-07	44	1	4.23333e-08	42.6	1	2.14667e-07	42.6	1
43.2	1.49e-06	1	43.2	1.775e-06	1	43.2	4.13e-08	1	43.2	1.77e-07	1	43.2	6.66667e-07	1	43.2	5.43333e-08	1	40.4	3.83333e-06	1	43.2	1	1.93e-07	43.2	1	1.49e-07	43.2	1	1.27333e-07	43.2	1	7.2e-07	43.2	1	1.10667e-07	43.2	1	2.66e-07	43.2	1	3.5e-07	43.2	1	4.2e-08	43.2	1	2.19667e-07	43.2	1
43.8	1.515e-06	1	43.8	1.815e-06	1	43.8	4.23e-08	1	43.8	1.77667e-07	1	43.8	6.83333e-07	1	43.8	5.96667e-08	1	41.1	3.9e-06	1	43.8	1	2.03333e-07	43.8	1	1.50667e-07	43.8	1	1.35333e-07	43.8	1	7.46667e-07	42.4	1	9.86667e-08	42.4	1	2.45e-07	42.4	1	3.4e-07	42.4	1	4.16667e-08	43.8	1	2.23e-07	43.8	1
44.4	1.545e-06	1	44.4	1.855e-06	1	44.4	4.32e-08	1	44.4	1.81667e-07	1	44.4	7e-07	1	44.4	5.9e-08	1	41.8	3.96667e-06	1	44.4	1	2.08667e-07	44.4	1	1.58333e-07	44.4	1	1.44333e-07	44.4	1	7.73333e-07	41.6	1	8.56667e-08	41.6	1	2.27333e-07	41.6	1	3.20333e-07	41.6	1	4.13333e-08	44.4	1	2.54667e-07	44.4	1
45	1.575e-06	1	45	1.89e-06	1	45	4.465e-08	1	45	1.85333e-07	1	45	7.13333e-07	1	45	6.23333e-08	1	42.5	4.03333e-06	1	45	1	2.16667e-07	45	1	1.63e-07	45	1	1.54e-07	45	1	7.96667e-07	40.8	1	7.56667e-08	40.8	1	2.15333e-07	40.8	1	2.84e-07	40.8	1	4.06667e-08	45	1	2.65667e-07	45	1
45.6	1.6e-06	1	45.6	1.935e-06	1	45.6	4.61e-08	1	45.6	1.88667e-07	1	45.6	7.36667e-07	1	45.6	6.76667e-08	1	43.2	4.1e-06	1	45.6	1	2.25667e-07	45.6	1	1.67333e-07	45.6	1	1.64e-07	45.6	1	8.2e-07	40	1	6.56667e-08	40	1	2.03e-07	40	1	2.51667e-07	40	1	4.03333e-08	45.6	1	2.69e-07	45.6	1
46.2	1.63e-06	1	46.2	1.98e-06	1	46.2	4.745e-08	1	46.2	1.93667e-07	1	46.2	7.53333e-07	1	46.2	7.23333e-08	1	43.9	4.16667e-06	1	46.2	1	2.34667e-07	46.2	1	1.71333e-07	46.2	1	1.66e-07	46.2	1	8.43333e-07	39.2	1	5.73333e-08	39.2	1	1.9e-07	39.2	1	2.38667e-07	39.2	1	3.96667e-08	46.2	1	2.71667e-07	46.2	1
46.8	1.665e-06	1	46.8	2.02e-06	1	46.8	4.925e-08	1	46.8	2.00333e-07	1	46.8	7.7e-07	1	46.8	7.26667e-08	1	44.6	4.26667e-06	1	46.8	1	2.44333e-07	46.8	1	1.76333e-07	46.8	1	1.68333e-07	46.8	1	8.6e-07	38.4	1	4.96667e-08	38.4	1	1.78667e-07	38.4	1	2.34333e-07	38.4	1	3.9e-08	46.8	1	2.76333e-07	46.8	1
47.4	1.68e-06	1	47.4	2.065e-06	1	47.4	5.1e-08	1	47.4	2.02667e-07	1	47.4	7.9e-07	1	47.4	7.76667e-08	1	45.3	4.33333e-06	1	47.4	1	2.54333e-07	47.4	1	1.81333e-07	47.4	1	1.80667e-07	47.4	1	8.9e-07	37.6	1	4.33333e-08	37.6	1	1.68667e-07	37.6	1	2.16e-07	37.6	1	3.93333e-08	47.4	1	2.85333e-07	47.4	1
48	1.71e-06	1	48	2.115e-06	1	48	5.25e-08	1	48	2.11333e-07	1	48	8.06667e-07	1	48	7.96667e-08	1	46	4.4e-06	1	48	1	2.61e-07	48	1	1.84667e-07	48	1	1.80333e-07	48	1	9.1e-07	36.8	1	3.73333e-08	36.8	1	1.59333e-07	36.8	1	1.99333e-07	36.8	1	3.76667e-08	48	1	2.93667e-07	48	1
48.6	1.74e-06	1	48.6	2.155e-06	1	48.6	5.35e-08	1	48.6	2.14667e-07	1	48.6	8.23333e-07	1	48.6	8.43333e-08	1	46.7	4.46667e-06	1	48.6	1	2.74667e-07	48.6	1	1.95667e-07	48.6	1	1.9e-07	48.6	1	9.43333e-07	36	1	3.11667e-08	36	1	1.50667e-07	36	1	1.84667e-07	36	1	3.73333e-08	48.6	1	3.06333e-07	48.6	1
49.2	1.77e-06	1	49.2	2.2e-06	1	49.2	5.5e-08	1	49.2	2.30333e-07	1	49.2	8.43333e-07	1	49.2	8.76667e-08	1	47.4	4.53333e-06	1	49.2	1	2.86e-07	49.2	1	2.03667e-07	49.2	1	2.00667e-07	49.2	1	9.63333e-07	35.2	1	2.57333e-08	35.2	1	1.38333e-07	35.2	1	1.70333e-07	35.2	1	3.66667e-08	49.2	1	3.12e-07	49.2	1
49.8	1.795e-06	1	49.8	2.235e-06	1	49.8	5.65e-08	1	49.8	2.26667e-07	1	49.8	8.6e-07	1	49.8	9.2e-08	1	48.1	4.6e-06	1	49.8	1	2.96667e-07	49.8	1	2.09e-07	49.8	1	2.09e-07	49.8	1	9.93333e-07	34.4	1	2.13333e-08	34.4	1	1.29333e-07	34.4	1	1.56e-07	34.4	1	3.63333e-08	49.8	1	3.16667e-07	49.8	1
50.4	1.82e-06	1	50.4	2.285e-06	1	50.4	5.85e-08	1	50.4	2.3e-07	1	50.4	8.8e-07	1	50.4	9.16667e-08	1	48.8	4.7e-06	1	50.4	1	3.04e-07	50.4	1	2.14667e-07	50.4	1	2.15333e-07	50.4	1	1.01667e-06	33.6	1	1.74e-08	33.6	1	1.16e-07	33.6	1	1.42e-07	33.6	1	3.56667e-08	50.4	1	3.25667e-07	50.4	1
51	1.85e-06	1	51	2.325e-06	1	51	6e-08	1	51	2.33667e-07	1	51	8.96667e-07	1	51	9.76667e-08	1	49.5	4.76667e-06	1	51	1	3.16e-07	51	1	2.19667e-07	51	1	2.3e-07	51	1	1.04e-06	32.8	1	1.42333e-08	32.8	1	1.08333e-07	32.8	1	1.27e-07	32.8	1	3.53333e-08	51	1	3.43333e-07	51	1
51.6	1.875e-06	1	51.6	2.37e-06	1	51.6	6.2e-08	1	51.6	2.47667e-07	1	51.6	9.16667e-07	1	51.6	1.04333e-07	1	50.2	4.83333e-06	1	51.6	1	3.30333e-07	51.6	1	2.28667e-07	51.6	1	2.31333e-07	51.6	1	1.06333e-06	32	1	1.13667e-08	32	1	1.01667e-07	32	1	1.06667e-07	32	1	3.63333e-08	51.6	1	3.5e-07	51.6	1
52.2	1.9e-06	1	52.2	2.415e-06	1	52.2	6.35e-08	1	52.2	2.47333e-07	1	52.2	9.36667e-07	1	52.2	1.09e-07	1	50.9	4.9e-06	1	52.2	1	3.43333e-07	52.2	1	2.28333e-07	52.2	1	2.35e-07	52.2	1	1.09667e-06	31.2	1	9.56667e-09	31.2	1	9.4e-08	31.2	1	9.13333e-08	31.2	1	3.4e-08	52.2	1	3.6e-07	52.2	1
52.8	1.935e-06	1	52.8	2.465e-06	1	52.8	6.5e-08	1	52.8	2.45e-07	1	52.8	9.56667e-07	1	52.8	1.15e-07	1	51.6	5e-06	1	52.8	1	3.53333e-07	52.8	1	2.37667e-07	52.8	1	2.47667e-07	52.8	1	1.12333e-06	30.4	1	7.93333e-09	30.4	1	8.36667e-08	30.4	1	8.1e-08	30.4	1	3.36667e-08	52.8	1	3.66667e-07	52.8	1
53.4	1.975e-06	1	53.4	2.44e-06	1	53.4	6.6e-08	1	53.4	2.53e-07	1	53.4	9.76667e-07	1	53.4	1.2e-07	1	52.3	5.06667e-06	1	53.4	1	3.7e-07	53.4	1	2.45667e-07	53.4	1	2.60667e-07	53.4	1	1.15e-06	29.6	1	6.06667e-09	29.6	1	7.6e-08	29.6	1	7.43333e-08	29.6	1	3.4e-08	53.4	1	3.73333e-07	53.4	1
54	1.985e-06	1	54	2.49e-06	1	54	6.75e-08	1	54	2.51333e-07	1	54	9.96667e-07	1	54	1.26e-07	1	53	5.13333e-06	1	54	1	3.7e-07	54	1	2.59e-07	54	1	2.65667e-07	54	1	1.17667e-06	28.8	1	4.66667e-09	28.8	1	6.86667e-08	28.8	1	6.53333e-08	28.8	1	3.26333e-08	54	1	3.83333e-07	54	1
54.6	2.02e-06	1	54.6	2.54e-06	1	54.6	6.85e-08	1	54.6	2.61e-07	1	54.6	1.01667e-06	1	54.6	1.31667e-07	1	53.7	5.23333e-06	1	54.6	1	3.86667e-07	54.6	1	2.61e-07	54.6	1	2.76e-07	54.6	1	1.20333e-06	28	1	3.43333e-09	28	1	5.96667e-08	28	1	5.63333e-08	28	1	3.22333e-08	54.6	1	3.93333e-07	54.6	1
55.2	2.05e-06	1	55.2	2.595e-06	1	55.2	7e-08	1	55.2	2.56667e-07	1	55.2	1.03667e-06	1	55.2	1.35333e-07	1	54.4	5.3e-06	1	55.2	1	4e-07	55.2	1	2.67e-07	55.2	1	2.83333e-07	55.2	1	1.23667e-06	27.2	1	2.59333e-09	27.2	1	5.2e-08	27.2	1	4.86667e-08	27.2	1	3.12667e-08	55.2	1	4e-07	55.2	1
55.8	2.08e-06	1	55.8	2.64e-06	1	55.8	7.15e-08	1	55.8	2.70667e-07	1	55.8	1.05667e-06	1	55.8	1.42e-07	1	55.1	5.36667e-06	1	55.8	1	4.1e-07	55.8	1	2.72e-07	55.8	1	2.95e-07	55.8	1	1.26333e-06	26.4	1	2.02e-09	26.4	1	4.8e-08	26.4	1	4.26667e-08	26.4	1	3.11333e-08	55.8	1	4.1e-07	55.8	1
56.4	2.105e-06	1	56.4	2.685e-06	1	56.4	7.35e-08	1	56.4	2.74667e-07	1	56.4	1.08e-06	1	56.4	1.46667e-07	1	55.8	5.43333e-06	1	56.4	1	4.16667e-07	56.4	1	2.79e-07	56.4	1	3.12667e-07	56.4	1	1.29667e-06	25.6	1	1.42e-09	25.6	1	4.3e-08	25.6	1	3.7e-08	25.6	1	3.04333e-08	56.4	1	4.2e-07	56.4	1
57	2.135e-06	1	57	2.745e-06	1	57	7.55e-08	1	57	2.87667e-07	1	57	1.09667e-06	1	57	1.53e-07	1	56.5	5.53333e-06	1	57	1	4.26667e-07	57	1	2.80667e-07	57	1	3.24333e-07	57	1	1.32667e-06	24.8	1	1.00667e-09	24.8	1	3.76667e-08	24.8	1	3.19667e-08	24.8	1	2.99333e-08	57	1	4.26667e-07	57	1
57.6	2.16e-06	1	57.6	2.79e-06	1	57.6	7.85e-08	1	57.6	2.92333e-07	1	57.6	1.11667e-06	1	57.6	1.62e-07	1	57.2	5.6e-06	1	57.6	1	4.33333e-07	57.6	1	2.85333e-07	57.6	1	3.25333e-07	57.6	1	1.35667e-06	24	1	7.13333e-10	24	1	3.33e-08	24	1	2.81667e-08	24	1	2.97667e-08	57.6	1	4.36667e-07	57.6	1
58.2	2.19e-06	1	58.2	2.845e-06	1	58.2	8.05e-08	1	58.2	3.04667e-07	1	58.2	1.13667e-06	1	58.2	1.74333e-07	1	57.9	5.7e-06	1	58.2	1	4.53333e-07	58.2	1	2.9e-07	58.2	1	3.4e-07	58.2	1	1.39e-06	23.2	1	5.43333e-10	23.2	1	3.1e-08	23.2	1	2.29667e-08	23.2	1	2.91e-08	58.2	1	4.43333e-07	58.2	1
58.8	2.215e-06	1	58.8	2.885e-06	1	58.8	8.25e-08	1	58.8	2.97e-07	1	58.8	1.16e-06	1	58.8	1.79e-07	1	58.6	5.76667e-06	1	58.8	1	4.63333e-07	58.8	1	2.98e-07	58.8	1	3.5e-07	58.8	1	1.41333e-06	22.4	1	3.63333e-10	22.4	1	2.55e-08	22.4	1	1.99333e-08	22.4	1	2.84e-08	58.8	1	4.56667e-07	58.8	1
59.4	2.245e-06	1	59.4	2.935e-06	1	59.4	8.4e-08	1	59.4	3.00333e-07	1	59.4	1.18333e-06	1	59.4	1.82667e-07	1	59.3	5.83333e-06	1	59.4	1	4.76667e-07	59.4	1	3.10333e-07	59.4	1	3.6e-07	59.4	1	1.44e-06	21.6	1	2.60333e-10	21.6	1	2.36667e-08	21.6	1	1.54333e-08	21.6	1	2.82e-08	59.4	1	4.63333e-07	59.4	1
60	2.275e-06	1	60	2.995e-06	1	60	8.55e-08	1	60	3.1e-07	1	60	1.20333e-06	1	60	1.94667e-07	1	60	5.93333e-06	1	60	1	4.93333e-07	60	1	3.12667e-07	60	1	3.63333e-07	60	1	1.46667e-06	20.8	1	1.82667e-10	20.8	1	2.00333e-08	20.8	1	1.31e-08	20.8	1	2.69667e-08	60	1	4.7e-07	60	1
60	2.28e-06	1	60	2.975e-06	1	60	8.55e-08	1	60	3.10667e-07	1	60	1.2e-06	1	60	1.94e-07	1	60	5.93333e-06	1	60	1	4.83333e-07	60	1	3.10333e-07	60	1	3.63333e-07	60	1	1.46667e-06	20	1	1.31e-10	20	1	1.74e-08	20	1	1.05667e-08	20	1	2.63667e-08	60	1	4.73333e-07	60	1
59.4	2.245e-06	1	59.4	2.905e-06	1	59.4	8.4e-08	1	59.4	2.99e-07	1	59.4	1.16667e-06	1	59.4	1.75667e-07	1	59.3	5.83333e-06	1	59.4	1	4.66667e-07	59.4	1	3.03e-07	59.4	1	3.33333e-07	59.4	1	1.41e-06	19.2	1	8.06667e-11	19.2	1	1.42333e-08	19.2	1	8.43333e-09	19.2	1	2.53e-08	59.4	1	4.6e-07	59.4	1
58.8	2.21e-06	1	58.8	2.835e-06	1	58.8	8.1e-08	1	58.8	3.03333e-07	1	58.8	1.13667e-06	1	58.8	1.65667e-07	1	58.6	5.73333e-06	1	58.8	1	4.36667e-07	58.8	1	2.91667e-07	58.8	1	3.10667e-07	58.8	1	1.36e-06	18.4	1	5.23333e-11	18.4	1	1.16e-08	18.4	1	6.8e-09	18.4	1	2.44667e-08	58.8	1	4.5e-07	58.8	1
58.2	2.175e-06	1	58.2	2.765e-06	1	58.2	7.75e-08	1	58.2	2.92333e-07	1	58.2	1.10667e-06	1	58.2	1.55e-07	1	57.9	5.63333e-06	1	58.2	1	4.2e-07	58.2	1	2.81667e-07	58.2	1	2.84667e-07	58.2	1	1.31333e-06	17.6	1	5e-11	17.6	1	9.43333e-09	17.6	1	5.46667e-09	17.6	1	2.38e-08	58.2	1	4.36667e-07	58.2	1
57.6	2.145e-06	1	57.6	2.705e-06	1	57.6	7.65e-08	1	57.6	2.73667e-07	1	57.6	1.08e-06	1	57.6	1.45667e-07	1	57.2	5.53333e-06	1	57.6	1	4e-07	57.6	1	2.65e-07	57.6	1	2.57667e-07	57.6	1	1.26333e-06	16.8	1	3.26e-11	16.8	1	7.5e-09	16.8	1	3.9e-09	16.8	1	2.32667e-08	57.6	1	4.33333e-07	57.6	1
57	2.105e-06	1	57	2.635e-06	1	57	7.4e-08	1	57	2.75e-07	1	57	1.05e-06	1	57	1.38667e-07	1	56.5	5.43333e-06	1	57	1	3.86667e-07	57	1	2.47e-07	57	1	2.40333e-07	57	1	1.21667e-06	16	1	2.58e-11	16	1	6.16667e-09	16	1	2.88333e-09	16	1	2.26e-08	57	1	4.13333e-07	57	1
56.4	2.075e-06	1	56.4	2.575e-06	1	56.4	7.3e-08	1	56.4	2.66333e-07	1	56.4	1.02333e-06	1	56.4	1.33667e-07	1	55.8	5.36667e-06	1	56.4	1	3.6e-07	56.4	1	2.43667e-07	56.4	1	2.29e-07	56.4	1	1.17333e-06	15.2	1	1.63333e-11	15.2	1	4.76667e-09	15.2	1	2.05333e-09	15.2	1	2.20333e-08	56.4	1	4.03333e-07	56.4	1
55.8	2.045e-06	1	55.8	2.515e-06	1	55.8	7.1e-08	1	55.8	2.61e-07	1	55.8	9.93333e-07	1	55.8	1.27333e-07	1	55.1	5.26667e-06	1	55.8	1	3.46667e-07	55.8	1	2.32667e-07	55.8	1	2.11333e-07	55.8	1	1.13333e-06	14.4	1	1.30667e-11	14.4	1	3.56667e-09	14.4	1	1.40333e-09	14.4	1	2.14333e-08	55.8	1	3.96667e-07	55.8	1
55.2	2.015e-06	1	55.2	2.455e-06	1	55.2	6.85e-08	1	55.2	2.66667e-07	1	55.2	9.66667e-07	1	55.2	1.24667e-07	1	54.4	5.2e-06	1	55.2	1	3.28333e-07	55.2	1	2.23667e-07	55.2	1	2e-07	55.2	1	1.09e-06	13.6	1	9.23333e-12	13.6	1	2.55333e-09	13.6	1	9.6e-10	13.6	1	2.09333e-08	55.2	1	3.83333e-07	55.2	1
54.6	1.975e-06	1	54.6	2.39e-06	1	54.6	6.7e-08	1	54.6	2.59667e-07	1	54.6	9.4e-07	1	54.6	1.15333e-07	1	53.7	5.1e-06	1	54.6	1	3.12667e-07	54.6	1	2.19333e-07	54.6	1	1.87e-07	54.6	1	1.05e-06	12.8	1	6.4e-12	12.8	1	1.88e-09	12.8	1	6.5e-10	12.8	1	2.05667e-08	54.6	1	3.76667e-07	54.6	1
54	1.945e-06	1	54	2.33e-06	1	54	6.45e-08	1	54	2.53333e-07	1	54	9.13333e-07	1	54	1.06333e-07	1	53	5e-06	1	54	1	2.95333e-07	54	1	2.09667e-07	54	1	1.74e-07	54	1	1.01667e-06	12	1	5.33333e-12	12	1	1.40667e-09	12	1	4.06667e-10	12	1	2.01e-08	54	1	3.66667e-07	54	1
53.4	1.91e-06	1	53.4	2.27e-06	1	53.4	6.25e-08	1	53.4	2.46e-07	1	53.4	8.86667e-07	1	53.4	1.04e-07	1	52.3	4.93333e-06	1	53.4	1	2.9e-07	53.4	1	2.00667e-07	53.4	1	1.60667e-07	53.4	1	9.76667e-07	11.2	1	3.56667e-12	11.2	1	9.93333e-10	11.2	1	3.20667e-10	11.2	1	1.95e-08	53.4	1	3.6e-07	53.4	1
52.8	1.88e-06	1	52.8	2.215e-06	1	52.8	6.05e-08	1	52.8	2.49667e-07	1	52.8	8.63333e-07	1	52.8	9.26667e-08	1	51.6	4.83333e-06	1	52.8	1	2.73667e-07	52.8	1	1.88e-07	52.8	1	1.5e-07	52.8	1	9.4e-07	10.4	1	3.20667e-12	10.4	1	6.7e-10	10.4	1	1.89333e-10	10.4	1	1.86e-08	52.8	1	3.5e-07	52.8	1
52.2	1.85e-06	1	52.2	2.16e-06	1	52.2	5.85e-08	1	52.2	2.44333e-07	1	52.2	8.36667e-07	1	52.2	8.63333e-08	1	50.9	4.76667e-06	1	52.2	1	2.59e-07	52.2	1	1.78667e-07	52.2	1	1.38333e-07	52.2	1	9.1e-07	9.6	1	2.16333e-12	9.6	1	3.9e-10	9.6	1	1.47667e-10	9.6	1	1.81e-08	52.2	1	3.36667e-07	52.2	1
51.6	1.82e-06	1	51.6	2.105e-06	1	51.6	5.65e-08	1	51.6	2.39333e-07	1	51.6	8.13333e-07	1	51.6	8.06667e-08	1	50.2	4.66667e-06	1	51.6	1	2.49667e-07	51.6	1	1.70333e-07	51.6	1	1.29667e-07	51.6	1	8.76667e-07	8.8	1	2.64667e-12	8.8	1	2.22333e-10	8.8	1	1.05667e-10	8.8	1	1.77e-08	51.6	1	3.28333e-07	51.6	1
51	1.785e-06	1	51	2.05e-06	1	51	5.55e-08	1	51	2.28667e-07	1	51	7.9e-07	1	51	7.7e-08	1	49.5	4.6e-06	1	51	1	2.40333e-07	51	1	1.66333e-07	51	1	1.23667e-07	51	1	8.36667e-07	8	1	4.36667e-13	8	1	1.5e-10	8	1	6.93333e-11	8	1	1.67667e-08	51	1	3.19e-07	51	1
50.4	1.75e-06	1	50.4	1.975e-06	1	50.4	5.35e-08	1	50.4	2.30333e-07	1	50.4	7.66667e-07	1	50.4	7.13333e-08	1	48.8	4.5e-06	1	50.4	1	2.22333e-07	50.4	1	1.58333e-07	50.4	1	1.14667e-07	50.4	1	8.06667e-07	7.2	1	2.70667e-12	7.2	1	8.8e-11	7.2	1	4.2e-11	7.2	1	1.60667e-08	50.4	1	3.09667e-07	50.4	1
49.8	1.72e-06	1	49.8	1.92e-06	1	49.8	5.15e-08	1	49.8	2.19e-07	1	49.8	7.43333e-07	1	49.8	6.73333e-08	1	48.1	4.43333e-06	1	49.8	1	2.12667e-07	49.8	1	1.52667e-07	49.8	1	1.07e-07	49.8	1	7.76667e-07	6.4	1	2.77667e-13	6.4	1	3.6e-11	6.4	1	2.66e-11	6.4	1	1.55333e-08	49.8	1	2.97667e-07	49.8	1
49.2	1.69e-06	1	49.2	1.87e-06	1	49.2	4.955e-08	1	49.2	2.11667e-07	1	49.2	7.2e-07	1	49.2	6.23333e-08	1	47.4	4.33333e-06	1	49.2	1	1.97333e-07	49.2	1	1.45e-07	49.2	1	9.93333e-08	49.2	1	7.43333e-07	5.6	1	2.54333e-12	5.6	1	2.55333e-11	5.6	1	1.88e-11	5.6	1	1.51333e-08	49.2	1	2.92333e-07	49.2	1
48.6	1.65e-06	1	48.6	1.815e-06	1	48.6	4.79e-08	1	48.6	2.07333e-07	1	48.6	7e-07	1	48.6	5.8e-08	1	46.7	4.26667e-06	1	48.6	1	1.88e-07	48.6	1	1.36667e-07	48.6	1	9.13333e-08	48.6	1	7.16667e-07	4.8	1	-8.63333e-13	4.8	1	1.93667e-11	4.8	1	1.26333e-11	4.8	1	1.46e-08	48.6	1	2.84667e-07	48.6	1
48	1.62e-06	1	48	1.765e-06	1	48	4.57e-08	1	48	1.99667e-07	1	48	6.76667e-07	1	48	5.36667e-08	1	46	4.2e-06	1	48	1	1.83e-07	48	1	1.28667e-07	48	1	8.43333e-08	48	1	6.83333e-07	4	1	1.67667e-12	4	1	1.37e-11	4	1	9.23333e-12	4	1	1.38333e-08	48	1	2.76333e-07	48	1
47.4	1.595e-06	1	47.4	1.715e-06	1	47.4	4.4e-08	1	47.4	1.89e-07	1	47.4	6.56667e-07	1	47.4	5.13333e-08	1	45.3	4.1e-06	1	47.4	1	1.75333e-07	47.4	1	1.24e-07	47.4	1	8.16667e-08	47.4	1	6.6e-07	3.2	1	-7.23333e-13	3.2	1	1.07e-11	3.2	1	9.53333e-12	3.2	1	1.31333e-08	47.4	1	2.69e-07	47.4	1
46.8	1.555e-06	1	46.8	1.665e-06	1	46.8	4.25e-08	1	46.8	1.85667e-07	1	46.8	6.36667e-07	1	46.8	4.6e-08	1	44.6	4.03333e-06	1	46.8	1	1.66667e-07	46.8	1	1.19e-07	46.8	1	8.1e-08	46.8	1	6.36667e-07	2.4	1	1.71e-12	2.4	1	7.86667e-12	2.4	1	5.13333e-12	2.4	1	1.23333e-08	46.8	1	2.6e-07	46.8	1
46.2	1.535e-06	1	46.2	1.615e-06	1	46.2	4.13e-08	1	46.2	1.83333e-07	1	46.2	6.16667e-07	1	46.2	4.2e-08	1	43.9	3.96667e-06	1	46.2	1	1.56667e-07	46.2	1	1.15333e-07	46.2	1	7.16667e-08	46.2	1	6.1e-07	1.6	1	2.56e-13	1.6	1	5.66667e-12	1.6	1	4.3e-12	1.6	1	1.17e-08	46.2	1	2.53333e-07	46.2	1
45.6	1.505e-06	1	45.6	1.57e-06	1	45.6	4.035e-08	1	45.6	1.81e-07	1	45.6	5.93333e-07	1	45.6	3.93333e-08	1	43.2	3.9e-06	1	45.6	1	1.51e-07	45.6	1	1.07e-07	45.6	1	6.6e-08	45.6	1	5.8e-07	0.8	1	-3.36667e-13	0.8	1	3.83333e-12	0.8	1	5.03333e-12	0.8	1	1.07667e-08	45.6	1	2.42667e-07	45.6	1
45	1.475e-06	1	45	1.52e-06	1	45	3.885e-08	1	45	1.80333e-07	1	45	5.73333e-07	1	45	3.63333e-08	1	42.5	3.8e-06	1	45	1	1.42333e-07	45	1	9.86667e-08	45	1	6.26667e-08	45	1	5.56667e-07	0	1	-4.13333e-13	0	1	2.77667e-12	0	1	4.76667e-12	0	1	1.02333e-08	45	1	2.35667e-07	45	1
44.4	1.45e-06	1	44.4	1.47e-06	1	44.4	3.685e-08	1	44.4	1.77e-07	1	44.4	5.53333e-07	1	44.4	3.36667e-08	1	41.8	3.73333e-06	1	44.4	1	1.34333e-07	44.4	1	9.4e-08	44.4	1	5.76667e-08	44.4	1	5.3e-07	-0.8	1	2.06e-13	-0.8	1	1.89333e-12	-0.8	1	5.83333e-12	-0.8	1	9.7e-09	44.4	1	2.28667e-07	44.4	1
43.8	1.42e-06	1	43.8	1.425e-06	1	43.8	3.56e-08	1	43.8	1.69e-07	1	43.8	5.36667e-07	1	43.8	3.11667e-08	1	41.1	3.66667e-06	1	43.8	1	1.28333e-07	43.8	1	9e-08	43.8	1	5.56667e-08	43.8	1	5.13333e-07	-1.6	1	1.42667e-12	-1.6	1	1.75667e-12	-1.6	1	2.66333e-12	-1.6	1	9.13333e-09	43.8	1	2.21333e-07	43.8	1
43.2	1.39e-06	1	43.2	1.375e-06	1	43.2	3.45e-08	1	43.2	1.60333e-07	1	43.2	5.2e-07	1	43.2	2.79333e-08	1	40.4	3.56667e-06	1	43.2	1	1.18333e-07	43.2	1	8.36667e-08	43.2	1	5.03333e-08	43.2	1	4.86667e-07	-2.4	1	-1.02333e-12	-2.4	1	1.27e-12	-2.4	1	3.17333e-12	-2.4	1	8.83333e-09	43.2	1	2.14e-07	43.2	1
42.6	1.36e-06	1	42.6	1.335e-06	1	42.6	3.335e-08	1	42.6	1.58333e-07	1	42.6	5e-07	1	42.6	2.46667e-08	1	39.7	3.5e-06	1	42.6	1	1.14e-07	42.6	1	7.9e-08	42.6	1	4.6e-08	42.6	1	4.7e-07	-3.2	1	1.42e-12	-3.2	1	1.29333e-12	-3.2	1	1.89333e-12	-3.2	1	8.06667e-09	42.6	1	2.06667e-07	42.6	1
42	1.33e-06	1	42	1.29e-06	1	42	3.23e-08	1	42	1.56e-07	1	42	4.83333e-07	1	42	2.27333e-08	1	39	3.43333e-06	1	42	1	1.08667e-07	42	1	7.26667e-08	42	1	4e-08	42	1	4.43333e-07	-4	1	-9.03333e-13	-4	1	9.8e-13	-4	1	7.6e-12	-4	1	7.5e-09	42	1	1.99333e-07	42	1
41.4	1.295e-06	1	41.4	1.25e-06	1	41.4	3.12e-08	1	41.4	1.51667e-07	1	41.4	4.66667e-07	1	41.4	2.05e-08	1	38.3	3.36667e-06	1	41.4	1	1.03e-07	41.4	1	6.76667e-08	41.4	1	3.93333e-08	41.4	1	4.23333e-07	-4.8	1	1.21e-12	-4.8	1	1.15667e-12	-4.8	1	4.33333e-12	-4.8	1	6.9e-09	41.4	1	1.92e-07	41.4	1
40.8	1.265e-06	1	40.8	1.205e-06	1	40.8	3.015e-08	1	40.8	1.47333e-07	1	40.8	4.46667e-07	1	40.8	1.80667e-08	1	37.6	3.30333e-06	1	40.8	1	9.8e-08	40.8	1	6.26667e-08	40.8	1	3.56667e-08	40.8	1	4.03333e-07	-5.6	1	-1.04e-12	-5.6	1	8.1e-13	-5.6	1	5.23333e-12	-5.6	1	6.36667e-09	40.8	1	1.85e-07	40.8	1
40.2	1.235e-06	1	40.2	1.165e-06	1	40.2	2.87e-08	1	40.2	1.40667e-07	1	40.2	4.3e-07	1	40.2	1.63667e-08	1	36.9	3.22333e-06	1	40.2	1	9.2e-08	40.2	1	5.83333e-08	40.2	1	3.4e-08	40.2	1	3.83333e-07	-6.4	1	1.69333e-12	-6.4	1	1.12333e-12	-6.4	1	1.36e-12	-6.4	1	5.76667e-09	40.2	1	1.78333e-07	40.2	1
39.6	1.21e-06	1	39.6	1.125e-06	1	39.6	2.74e-08	1	39.6	1.36e-07	1	39.6	4.13333e-07	1	39.6	1.42333e-08	1	36.2	3.15667e-06	1	39.6	1	8.56667e-08	39.6	1	5.46667e-08	39.6	1	3.2e-08	39.6	1	3.63333e-07	-7.2	1	-1.49e-12	-7.2	1	7.7e-13	-7.2	1	2.13667e-12	-7.2	1	5.23333e-09	39.6	1	1.71333e-07	39.6	1
39	1.185e-06	1	39	1.085e-06	1	39	2.625e-08	1	39	1.37667e-07	1	39	3.96667e-07	1	39	1.23e-08	1	35.5	3.08667e-06	1	39	1	8.1e-08	39	1	5.13333e-08	39	1	3.05e-08	39	1	3.46667e-07	-8	1	2.01e-12	-8	1	8.03333e-13	-8	1	5.06667e-13	-8	1	4.7e-09	39	1	1.65e-07	39	1
38.4	1.155e-06	1	38.4	1.045e-06	1	38.4	2.52e-08	1	38.4	1.30667e-07	1	38.4	3.83333e-07	1	38.4	1.07333e-08	1	34.8	3.02333e-06	1	38.4	1	7.66667e-08	38.4	1	4.6e-08	38.4	1	2.92e-08	38.4	1	3.33e-07	-8.8	1	-2.1e-14	-8.8	1	6.66667e-13	-8.8	1	6.76667e-12	-8.8	1	4.2e-09	38.4	1	1.58e-07	38.4	1
37.8	1.13e-06	1	37.8	1.01e-06	1	37.8	2.41e-08	1	37.8	1.3e-07	1	37.8	3.66667e-07	1	37.8	9.33333e-09	1	34.1	2.95333e-06	1	37.8	1	7.43333e-08	37.8	1	4.4e-08	37.8	1	2.63e-08	37.8	1	3.14333e-07	-9.6	1	9.6e-13	-9.6	1	6.06667e-13	-9.6	1	5.3e-12	-9.6	1	3.83333e-09	37.8	1	1.48667e-07	37.8	1
37.2	1.105e-06	1	37.2	9.7e-07	1	37.2	2.295e-08	1	37.2	1.22667e-07	1	37.2	3.53333e-07	1	37.2	7.9e-09	1	33.4	2.89e-06	1	37.2	1	6.9e-08	37.2	1	4.13333e-08	37.2	1	2.27667e-08	37.2	1	3.00333e-07	-10.4	1	2.76667e-13	-10.4	1	8.4e-13	-10.4	1	5.83333e-12	-10.4	1	3.43333e-09	37.2	1	1.40667e-07	37.2	1
36.6	1.075e-06	1	36.6	9.4e-07	1	36.6	2.19e-08	1	36.6	1.19333e-07	1	36.6	3.36667e-07	1	36.6	6.63333e-09	1	32.7	2.82333e-06	1	36.6	1	6.43333e-08	36.6	1	3.7e-08	36.6	1	2.29e-08	36.6	1	2.82667e-07	-11.2	1	-2.68333e-13	-11.2	1	1.01667e-12	-11.2	1	2.81667e-12	-11.2	1	2.94333e-09	36.6	1	1.30667e-07	36.6	1
36	1.045e-06	1	36	9e-07	1	36	2.06e-08	1	36	1.13e-07	1	36	3.23e-07	1	36	5.46667e-09	1	32	2.75667e-06	1	36	1	6.16667e-08	36	1	3.46667e-08	36	1	2.07333e-08	36	1	2.63667e-07	-12	1	1.56e-12	-12	1	7.8e-13	-12	1	1.88333e-12	-12	1	2.63e-09	36	1	1.21667e-07	36	1
35.4	1.025e-06	1	35.4	8.65e-07	1	35.4	1.96e-08	1	35.4	1.10667e-07	1	35.4	3.09333e-07	1	35.4	4.43333e-09	1	31.3	2.69e-06	1	35.4	1	5.63333e-08	35.4	1	3.24e-08	35.4	1	1.89e-08	35.4	1	2.51e-07	-12.8	1	-1.95333e-13	-12.8	1	7.43333e-13	-12.8	1	1.89e-12	-12.8	1	2.28e-09	35.4	1	1.14333e-07	35.4	1
34.8	1e-06	1	34.8	8.3e-07	1	34.8	1.865e-08	1	34.8	1.09333e-07	1	34.8	2.96667e-07	1	34.8	3.53333e-09	1	30.6	2.62667e-06	1	34.8	1	5.3e-08	34.8	1	2.95333e-08	34.8	1	1.84e-08	34.8	1	2.35e-07	-13.6	1	1.17667e-12	-13.6	1	1.20333e-12	-13.6	1	2.18333e-12	-13.6	1	1.95e-09	34.8	1	1.08333e-07	34.8	1
34.2	9.65e-07	1	34.2	8e-07	1	34.2	1.77e-08	1	34.2	1.05667e-07	1	34.2	2.83e-07	1	34.2	2.76333e-09	1	29.9	2.56667e-06	1	34.2	1	4.83333e-08	34.2	1	2.70667e-08	34.2	1	1.57333e-08	34.2	1	2.21667e-07	-14.4	1	-1.07333e-12	-14.4	1	6.66667e-13	-14.4	1	6.13333e-12	-14.4	1	1.69e-09	34.2	1	1.03667e-07	34.2	1
33.6	9.4e-07	1	33.6	7.65e-07	1	33.6	1.665e-08	1	33.6	1.03667e-07	1	33.6	2.71667e-07	1	33.6	2.09e-09	1	29.2	2.50333e-06	1	33.6	1	4.66667e-08	33.6	1	2.45667e-08	33.6	1	1.52e-08	33.6	1	2.09333e-07	-15.2	1	-4.2e-13	-15.2	1	6.16667e-13	-15.2	1	2.66333e-12	-15.2	1	1.43e-09	33.6	1	1e-07	33.6	1
33	9.15e-07	1	33	7.35e-07	1	33	1.585e-08	1	33	1.01e-07	1	33	2.57e-07	1	33	1.52e-09	1	28.5	2.44e-06	1	33	1	4.26667e-08	33	1	2.29667e-08	33	1	1.42667e-08	33	1	1.96e-07	-16	1	-1.59333e-12	-16	1	7.16667e-13	-16	1	4.36667e-12	-16	1	1.18667e-09	33	1	9.66667e-08	33	1
32.4	8.9e-07	1	32.4	7.05e-07	1	32.4	1.48e-08	1	32.4	1.01e-07	1	32.4	2.45e-07	1	32.4	1.04e-09	1	27.8	2.38e-06	1	32.4	1	3.93333e-08	32.4	1	2.07667e-08	32.4	1	1.32333e-08	32.4	1	1.85333e-07	-16.8	1	1.55667e-12	-16.8	1	1.32333e-12	-16.8	1	1.06333e-12	-16.8	1	9.63333e-10	32.4	1	9.4e-08	32.4	1
31.8	8.6e-07	1	31.8	6.75e-07	1	31.8	1.4e-08	1	31.8	9.7e-08	1	31.8	2.33333e-07	1	31.8	6.96667e-10	1	27.1	2.32333e-06	1	31.8	1	3.66667e-08	31.8	1	1.85e-08	31.8	1	1.19333e-08	31.8	1	1.74333e-07	-17.6	1	4.66667e-14	-17.6	1	8.06667e-13	-17.6	1	3.43333e-12	-17.6	1	7.7e-10	31.8	1	9.1e-08	31.8	1
31.2	8.45e-07	1	31.2	6.45e-07	1	31.2	1.32e-08	1	31.2	9.13333e-08	1	31.2	2.23e-07	1	31.2	4.4e-10	1	26.4	2.26333e-06	1	31.2	1	3.46667e-08	31.2	1	1.72667e-08	31.2	1	1.10333e-08	31.2	1	1.62333e-07	-18.4	1	1.97333e-12	-18.4	1	1.24333e-12	-18.4	1	2.57333e-12	-18.4	1	5.86667e-10	31.2	1	8.86667e-08	31.2	1
30.6	8.2e-07	1	30.6	6.15e-07	1	30.6	1.27e-08	1	30.6	8.96667e-08	1	30.6	2.11e-07	1	30.6	2.72667e-10	1	25.7	2.21e-06	1	30.6	1	3.24333e-08	30.6	1	1.50333e-08	30.6	1	1.01e-08	30.6	1	1.51667e-07	-19.2	1	-5.6e-13	-19.2	1	4.23333e-13	-19.2	1	5.93333e-12	-19.2	1	4.36667e-10	30.6	1	8.63333e-08	30.6	1
30	7.9e-07	1	30	5.9e-07	1	30	1.19e-08	1	30	8.53333e-08	1	30	2.01333e-07	1	30	1.44333e-10	1	25	2.15333e-06	1	30	1	2.99333e-08	30	1	1.37333e-08	30	1	8.9e-09	30	1	1.40667e-07	-20	1	-4.46667e-13	-20	1	6.4e-13	-20	1	3.53333e-12	-20	1	2.65667e-10	30	1	8.4e-08	30	1
29.4	7.7e-07	1	29.4	5.6e-07	1	29.4	1.115e-08	1	29.4	8.06667e-08	1	29.4	1.89667e-07	1	29.4	7.16667e-11	1	24.3	2.09667e-06	1	29.4	1	2.70333e-08	29.4	1	1.25e-08	29.4	1	7.46667e-09	29.4	1	1.30667e-07	-20.8	1	-1.35e-12	-20.8	1	4.46667e-13	-20.8	1	4.26667e-12	-20.8	1	1.65333e-10	29.4	1	8.2e-08	29.4	1
28.8	7.4e-07	1	28.8	5.35e-07	1	28.8	1.055e-08	1	28.8	7.53333e-08	1	28.8	1.79e-07	1	28.8	3.43333e-11	1	23.6	2.03667e-06	1	28.8	1	2.50667e-08	28.8	1	1.09e-08	28.8	1	6.43333e-09	28.8	1	1.19e-07	-21.6	1	1.91e-12	-21.6	1	6.33333e-13	-21.6	1	2.56333e-12	-21.6	1	9.13333e-11	28.8	1	7.96667e-08	28.8	1
28.2	7.2e-07	1	28.2	5.1e-07	1	28.2	9.95e-09	1	28.2	7.4e-08	1	28.2	1.70333e-07	1	28.2	1.5e-11	1	22.9	1.98e-06	1	28.2	1	2.28e-08	28.2	1	9.4e-09	28.2	1	6e-09	28.2	1	1.11333e-07	-22.4	1	6.7e-13	-22.4	1	6.33333e-13	-22.4	1	2.51333e-12	-22.4	1	5.06667e-11	28.2	1	7.8e-08	28.2	1
27.6	6.95e-07	1	27.6	4.86e-07	1	27.6	9.2e-09	1	27.6	7.43333e-08	1	27.6	1.60667e-07	1	27.6	5.26667e-12	1	22.2	1.93e-06	1	27.6	1	2.09e-08	27.6	1	8.26667e-09	27.6	1	5.63333e-09	27.6	1	1.03e-07	-23.2	1	1.03e-12	-23.2	1	9.2e-13	-23.2	1	3.56667e-12	-23.2	1	2.41667e-11	27.6	1	7.63333e-08	27.6	1
27	6.75e-07	1	27	4.615e-07	1	27	8.7e-09	1	27	7.03333e-08	1	27	1.52333e-07	1	27	2.29667e-12	1	21.5	1.87667e-06	1	27	1	1.94e-08	27	1	7.43333e-09	27	1	4.4e-09	27	1	9.53333e-08	-24	1	1.45333e-12	-24	1	6e-13	-24	1	1.54e-12	-24	1	1.16e-11	27	1	7.46667e-08	27	1
26.4	6.55e-07	1	26.4	4.385e-07	1	26.4	8.1e-09	1	26.4	7.2e-08	1	26.4	1.42333e-07	1	26.4	6.1e-13	1	20.8	1.82333e-06	1	26.4	1	1.75e-08	26.4	1	7.16667e-09	26.4	1	3.93333e-09	26.4	1	8.8e-08	-24.8	1	-6.13333e-13	-24.8	1	7.23333e-13	-24.8	1	4.4e-12	-24.8	1	7.43333e-12	26.4	1	7.26667e-08	26.4	1
25.8	6.3e-07	1	25.8	4.165e-07	1	25.8	7.5e-09	1	25.8	6.8e-08	1	25.8	1.34e-07	1	25.8	1.82e-13	1	20.1	1.77333e-06	1	25.8	1	1.55e-08	25.8	1	6.06667e-09	25.8	1	4.06667e-09	25.8	1	8.1e-08	-25.6	1	6.13333e-13	-25.6	1	9.13333e-13	-25.6	1	1.86333e-12	-25.6	1	5.93333e-12	25.8	1	7.1e-08	25.8	1
25.2	6.1e-07	1	25.2	3.94e-07	1	25.2	7e-09	1	25.2	6.5e-08	1	25.2	1.26667e-07	1	25.2	3.23333e-14	1	19.4	1.72e-06	1	25.2	1	1.41333e-08	25.2	1	5.5e-09	25.2	1	3.5e-09	25.2	1	7.26667e-08	-26.4	1	-1.5e-12	-26.4	1	6.23333e-13	-26.4	1	2.37e-12	-26.4	1	5.86667e-12	25.2	1	6.93333e-08	25.2	1
24.6	5.85e-07	1	24.6	3.705e-07	1	24.6	6.45e-09	1	24.6	6.3e-08	1	24.6	1.18667e-07	1	24.6	3.8e-14	1	18.7	1.66667e-06	1	24.6	1	1.25333e-08	24.6	1	4.86667e-09	24.6	1	3.14333e-09	24.6	1	6.63333e-08	-27.2	1	1.37e-12	-27.2	1	1.3e-12	-27.2	1	1.30667e-12	-27.2	1	5.8e-12	24.6	1	6.76667e-08	24.6	1
24	5.65e-07	1	24	3.51e-07	1	24	6e-09	1	24	6.06667e-08	1	24	1.11e-07	1	24	2.33333e-15	1	18	1.61667e-06	1	24	1	1.12e-08	24	1	4.1e-09	24	1	2.78333e-09	24	1	6.03333e-08	-28	1	-3.9e-13	-28	1	7.86667e-13	-28	1	4.33333e-12	-28	1	6.03333e-12	24	1	6.63333e-08	24	1
23.4	5.45e-07	1	23.4	3.305e-07	1	23.4	5.6e-09	1	23.4	5.73333e-08	1	23.4	1.04e-07	1	23.4	-2.5e-14	1	17.3	1.57e-06	1	23.4	1	9.93333e-09	23.4	1	3.63333e-09	23.4	1	2.55667e-09	23.4	1	5.5e-08	-28.8	1	4.16667e-12	-28.8	1	6.9e-13	-28.8	1	2.12667e-12	-28.8	1	6.36667e-12	23.4	1	6.5e-08	23.4	1
22.8	5.25e-07	1	22.8	3.11e-07	1	22.8	5.15e-09	1	22.8	5.73333e-08	1	22.8	9.73333e-08	1	22.8	1.53333e-14	1	16.6	1.52e-06	1	22.8	1	8.76667e-09	22.8	1	3.28667e-09	22.8	1	2.17667e-09	22.8	1	5e-08	-29.6	1	1.12667e-12	-29.6	1	7.76667e-13	-29.6	1	5.3e-12	-29.6	1	6.16667e-12	22.8	1	6.36667e-08	22.8	1
22.2	5e-07	1	22.2	2.945e-07	1	22.2	4.695e-09	1	22.2	5.43333e-08	1	22.2	9.1e-08	1	22.2	-1.2e-14	1	15.9	1.47667e-06	1	22.2	1	7.5e-09	22.2	1	2.88667e-09	22.2	1	1.74333e-09	22.2	1	4.43333e-08	-30.4	1	-5.46667e-13	-30.4	1	1.34e-12	-30.4	1	3.93333e-12	-30.4	1	6.33333e-12	22.2	1	6.26667e-08	22.2	1
21.6	4.85e-07	1	21.6	2.76e-07	1	21.6	4.3e-09	1	21.6	5.33333e-08	1	21.6	8.5e-08	1	21.6	5.66667e-15	1	15.2	1.43e-06	1	21.6	1	6.56667e-09	21.6	1	2.39e-09	21.6	1	1.54667e-09	21.6	1	4.03333e-08	-31.2	1	-9.1e-13	-31.2	1	9.13333e-13	-31.2	1	6.06667e-12	-31.2	1	6.03333e-12	21.6	1	6.16667e-08	21.6	1
21	4.665e-07	1	21	2.605e-07	1	21	4.01e-09	1	21	5e-08	1	21	7.83333e-08	1	21	1.33333e-15	1	14.5	1.38667e-06	1	21	1	5.46667e-09	21	1	2.03e-09	21	1	1.43e-09	21	1	3.56667e-08	-32	1	-4.26667e-13	-32	1	1.22333e-12	-32	1	2.89e-12	-32	1	6.43333e-12	21	1	6.03333e-08	21	1
20.4	4.495e-07	1	20.4	2.445e-07	1	20.4	3.685e-09	1	20.4	4.73333e-08	1	20.4	7.23333e-08	1	20.4	1.26667e-14	1	13.8	1.34e-06	1	20.4	1	4.66667e-09	20.4	1	1.79333e-09	20.4	1	1.43e-09	20.4	1	3.21e-08	-32.8	1	1.16667e-12	-32.8	1	8.73333e-13	-32.8	1	3.6e-12	-32.8	1	6.5e-12	20.4	1	5.96667e-08	20.4	1
19.8	4.28e-07	1	19.8	2.295e-07	1	19.8	3.315e-09	1	19.8	4.63333e-08	1	19.8	6.76667e-08	1	19.8	3.66667e-15	1	13.1	1.29333e-06	1	19.8	1	3.8e-09	19.8	1	1.45333e-09	19.8	1	1.43e-09	19.8	1	2.84667e-08	-33.6	1	2.33333e-12	-33.6	1	7.23333e-13	-33.6	1	2.86333e-12	-33.6	1	6.23333e-12	19.8	1	5.83333e-08	19.8	1
19.2	4.145e-07	1	19.2	2.155e-07	1	19.2	3.025e-09	1	19.2	4.43333e-08	1	19.2	6.26667e-08	1	19.2	-2.33333e-15	1	12.4	1.25333e-06	1	19.2	1	3.21333e-09	19.2	1	1.23667e-09	19.2	1	1.16e-09	19.2	1	2.54667e-08	-34.4	1	1.97333e-12	-34.4	1	8.13333e-13	-34.4	1	2.77667e-12	-34.4	1	6.23333e-12	19.2	1	5.76667e-08	19.2	1
18.6	3.95e-07	1	18.6	2.02e-07	1	18.6	2.74e-09	1	18.6	4.06667e-08	1	18.6	5.76667e-08	1	18.6	3.66667e-15	1	11.7	1.21e-06	1	18.6	1	2.56e-09	18.6	1	1.02667e-09	18.6	1	9.2e-10	18.6	1	2.25e-08	-35.2	1	-3.4e-13	-35.2	1	7.76667e-13	-35.2	1	3.86667e-12	-35.2	1	5.63333e-12	18.6	1	5.66667e-08	18.6	1
18	3.78e-07	1	18	1.905e-07	1	18	2.44e-09	1	18	3.86667e-08	1	18	5.33333e-08	1	18	-2.1e-14	1	11	1.17e-06	1	18	1	2.08333e-09	18	1	9.43333e-10	18	1	8.6e-10	18	1	1.96e-08	-36	1	1.00333e-12	-36	1	6.8e-13	-36	1	2.78667e-12	-36	1	5.8e-12	18	1	5.56667e-08	18	1
17.4	3.6e-07	1	17.4	1.77e-07	1	17.4	2.205e-09	1	17.4	3.7e-08	1	17.4	4.83333e-08	1	17.4	2.76667e-14	1	10.3	1.13e-06	1	17.4	1	1.61667e-09	17.4	1	7.6e-10	17.4	1	6.63333e-10	17.4	1	1.71e-08	-36.8	1	-1.35333e-12	-36.8	1	4.83333e-13	-36.8	1	4.63333e-12	-36.8	1	5.83333e-12	17.4	1	5.46667e-08	17.4	1
16.8	3.45e-07	1	16.8	1.66e-07	1	16.8	2.04e-09	1	16.8	3.56667e-08	1	16.8	4.43333e-08	1	16.8	1.13333e-14	1	9.6	1.08667e-06	1	16.8	1	1.28333e-09	16.8	1	6.56667e-10	16.8	1	6e-10	16.8	1	1.49667e-08	-37.6	1	1.30333e-12	-37.6	1	7.2e-13	-37.6	1	2.37e-12	-37.6	1	5.93333e-12	16.8	1	5.36667e-08	16.8	1
16.2	3.275e-07	1	16.2	1.525e-07	1	16.2	1.815e-09	1	16.2	3.46667e-08	1	16.2	4.06667e-08	1	16.2	5e-15	1	8.9	1.05e-06	1	16.2	1	9.66667e-10	16.2	1	5.6e-10	16.2	1	5.06667e-10	16.2	1	1.28667e-08	-38.4	1	-6.93333e-13	-38.4	1	5.4e-13	-38.4	1	6.23333e-12	-38.4	1	5.76667e-12	16.2	1	5.26667e-08	16.2	1
15.6	3.115e-07	1	15.6	1.42e-07	1	15.6	1.62e-09	1	15.6	3.28333e-08	1	15.6	3.66667e-08	1	15.6	-2.33333e-15	1	8.2	1.01333e-06	1	15.6	1	7.13333e-10	15.6	1	4.73333e-10	15.6	1	4.4e-10	15.6	1	1.10667e-08	-39.2	1	2.72e-12	-39.2	1	6.56667e-13	-39.2	1	1.09333e-12	-39.2	1	5.9e-12	15.6	1	5.2e-08	15.6	1
15	2.955e-07	1	15	1.32e-07	1	15	1.405e-09	1	15	3.14667e-08	1	15	3.31e-08	1	15	-2.1e-14	1	7.5	9.73333e-07	1	15	1	5.63333e-10	15	1	4.1e-10	15	1	3.76667e-10	15	1	9.23333e-09	-40	1	8.1e-13	-40	1	8.5e-13	-40	1	3.73333e-12	-40	1	6.06667e-12	15	1	5.13333e-08	15	1
14.4	2.825e-07	1	14.4	1.235e-07	1	14.4	1.225e-09	1	14.4	2.96e-08	1	14.4	3.02e-08	1	14.4	-2.8e-14	1	6.8	9.36667e-07	1	14.4	1	4.03333e-10	14.4	1	3.6e-10	14.4	1	3.00667e-10	14.4	1	7.7e-09	-40.8	1	3.00667e-13	-40.8	1	8.16667e-13	-40.8	1	-1.33333e-14	-40.8	1	6.23333e-12	14.4	1	5.03333e-08	14.4	1
13.8	2.67e-07	1	13.8	1.145e-07	1	13.8	1.08e-09	1	13.8	2.79e-08	1	13.8	2.71333e-08	1	13.8	1.83333e-14	1	6.1	9e-07	1	13.8	1	2.97667e-10	13.8	1	3.02333e-10	13.8	1	2.67333e-10	13.8	1	6.53333e-09	-41.6	1	2.41667e-13	-41.6	1	1.01667e-12	-41.6	1	4.3e-12	-41.6	1	6.4e-12	13.8	1	4.93333e-08	13.8	1
13.2	2.5e-07	1	13.2	1.05e-07	1	13.2	9.65e-10	1	13.2	2.54333e-08	1	13.2	2.43e-08	1	13.2	-5.33333e-15	1	5.4	8.66667e-07	1	13.2	1	2.12e-10	13.2	1	2.56333e-10	13.2	1	2.47e-10	13.2	1	5.4e-09	-42.4	1	1.41667e-13	-42.4	1	8.9e-13	-42.4	1	3.28e-12	-42.4	1	7.23333e-12	13.2	1	4.86667e-08	13.2	1
12.6	2.38e-07	1	12.6	9.7e-08	1	12.6	8.2e-10	1	12.6	2.39667e-08	1	12.6	2.16333e-08	1	12.6	-2.8e-14	1	4.7	8.3e-07	1	12.6	1	1.41e-10	12.6	1	2.29667e-10	12.6	1	2.07667e-10	12.6	1	4.43333e-09	-43.2	1	-1.82667e-12	-43.2	1	9.33333e-13	-43.2	1	6.7e-12	-43.2	1	7.7e-12	12.6	1	4.76667e-08	12.6	1
12	2.235e-07	1	12	8.9e-08	1	12	7.15e-10	1	12	2.33333e-08	1	12	1.93e-08	1	12	-3.13333e-14	1	4	8e-07	1	12	1	9.23333e-11	12	1	2.12667e-10	12	1	1.9e-10	12	1	3.6e-09	-44	1	-6.56667e-13	-44	1	4.93333e-13	-44	1	3.46667e-12	-44	1	6.73333e-12	12	1	4.7e-08	12	1
11.4	2.1e-07	1	11.4	8.15e-08	1	11.4	6e-10	1	11.4	2.16667e-08	1	11.4	1.71333e-08	1	11.4	-1.93333e-14	1	3.3	7.66667e-07	1	11.4	1	6.43333e-11	11.4	1	1.93667e-10	11.4	1	1.83e-10	11.4	1	2.91e-09	-44.8	1	4.03333e-12	-44.8	1	6.9e-13	-44.8	1	7.36667e-13	-44.8	1	6.6e-12	11.4	1	4.6e-08	11.4	1
10.8	1.98e-07	1	10.8	7.5e-08	1	10.8	5.15e-10	1	10.8	1.99e-08	1	10.8	1.49667e-08	1	10.8	-1.33333e-14	1	2.6	7.33333e-07	1	10.8	1	3.8e-11	10.8	1	1.72667e-10	10.8	1	1.82333e-10	10.8	1	2.30667e-09	-45.6	1	-1.59333e-12	-45.6	1	5.66667e-13	-45.6	1	2.30333e-12	-45.6	1	6.53333e-12	10.8	1	4.5e-08	10.8	1
10.2	1.86e-07	1	10.2	6.9e-08	1	10.2	4.27e-10	1	10.2	1.89e-08	1	10.2	1.31333e-08	1	10.2	7.33333e-15	1	1.9	7.03333e-07	1	10.2	1	2.32667e-11	10.2	1	1.59e-10	10.2	1	1.83e-10	10.2	1	1.82e-09	-46.4	1	9.56667e-13	-46.4	1	5.3e-13	-46.4	1	1.53e-12	-46.4	1	6.36667e-12	10.2	1	4.43333e-08	10.2	1
9.6	1.745e-07	1	9.6	6.25e-08	1	9.6	3.475e-10	1	9.6	1.74667e-08	1	9.6	1.14333e-08	1	9.6	-1.8e-14	1	1.2	6.7e-07	1	9.6	1	1.64e-11	9.6	1	1.49333e-10	9.6	1	1.78e-10	9.6	1	1.41e-09	-47.2	1	1.00333e-12	-47.2	1	1.01667e-12	-47.2	1	8.03333e-12	-47.2	1	6.33333e-12	9.6	1	4.3e-08	9.6	1
9	1.625e-07	1	9	5.7e-08	1	9	2.8e-10	1	9	1.64e-08	1	9	1.00333e-08	1	9	-1.36667e-14	1	0.5	6.43333e-07	1	9	1	8.03333e-12	9	1	1.37333e-10	9	1	1.66667e-10	9	1	1.06333e-09	-48	1	-1.60333e-12	-48	1	7.46667e-13	-48	1	3.46667e-12	-48	1	6.16667e-12	9	1	4.23333e-08	9	1
8.4	1.505e-07	1	8.4	5.2e-08	1	8.4	2.28e-10	1	8.4	1.50667e-08	1	8.4	8.56667e-09	1	8.4	-2.33333e-15	1	-0.2	6.13333e-07	1	8.4	1	6.5e-12	8.4	1	1.29333e-10	8.4	1	1.63667e-10	8.4	1	8.1e-10	-48.8	1	-5.06667e-13	-48.8	1	8.86667e-13	-48.8	1	6.86667e-12	-48.8	1	6.96667e-12	8.4	1	4.13333e-08	8.4	1
7.8	1.405e-07	1	7.8	4.715e-08	1	7.8	1.95e-10	1	7.8	1.39333e-08	1	7.8	7.23333e-09	1	7.8	-1.6e-14	1	-0.9	5.83333e-07	1	7.8	1	3.14667e-12	7.8	1	1.27e-10	7.8	1	1.61e-10	7.8	1	6.16667e-10	-49.6	1	1.28e-12	-49.6	1	5.06667e-13	-49.6	1	-1.57667e-13	-49.6	1	5.8e-12	7.8	1	4.03333e-08	7.8	1
7.2	1.3e-07	1	7.2	4.26e-08	1	7.2	1.5e-10	1	7.2	1.30667e-08	1	7.2	6.16667e-09	1	7.2	9.33333e-15	1	-1.6	5.56667e-07	1	7.2	1	1.33333e-12	7.2	1	1.23333e-10	7.2	1	1.59667e-10	7.2	1	4.66667e-10	-50.4	1	-1.67333e-13	-50.4	1	6.5e-13	-50.4	1	1.34333e-12	-50.4	1	5.8e-12	7.2	1	3.93333e-08	7.2	1
6.6	1.205e-07	1	6.6	3.83e-08	1	6.6	1.135e-10	1	6.6	1.23333e-08	1	6.6	5.26667e-09	1	6.6	3.66667e-15	1	-2.3	5.33333e-07	1	6.6	1	4.63333e-13	6.6	1	1.18667e-10	6.6	1	1.57333e-10	6.6	1	3.53333e-10	-51.2	1	-7.53333e-13	-51.2	1	1.09333e-12	-51.2	1	4.2e-13	-51.2	1	6.56667e-12	6.6	1	3.83333e-08	6.6	1
6	1.115e-07	1	6	3.44e-08	1	6	8.3e-11	1	6	1.11333e-08	1	6	4.3e-09	1	6	-1.3e-14	1	-3	5.06667e-07	1	6	1	2.76667e-13	6	1	1.16667e-10	6	1	1.55333e-10	6	1	2.97333e-10	-52	1	3.46667e-13	-52	1	7.5e-13	-52	1	7.1e-12	-52	1	6.16667e-12	6	1	3.73333e-08	6	1
5.4	1.025e-07	1	5.4	3.1e-08	1	5.4	5.95e-11	1	5.4	1.02333e-08	1	5.4	3.56667e-09	1	5.4	-3.33333e-15	1	-3.7	4.83333e-07	1	5.4	1	2.8e-14	5.4	1	1.16333e-10	5.4	1	1.54667e-10	5.4	1	2.46667e-10	-52.8	1	-6.5e-13	-52.8	1	4.66667e-13	-52.8	1	5.83333e-12	-52.8	1	6.1e-12	5.4	1	3.63333e-08	5.4	1
4.8	9.5e-08	1	4.8	2.76e-08	1	4.8	4.07e-11	1	4.8	9.26667e-09	1	4.8	2.91667e-09	1	4.8	1.43333e-14	1	-4.4	4.56667e-07	1	4.8	1	-1.10667e-13	4.8	1	1.14333e-10	4.8	1	1.55e-10	4.8	1	2.19333e-10	-53.6	1	-1.70667e-12	-53.6	1	7.96667e-13	-53.6	1	6.4e-12	-53.6	1	6.26667e-12	4.8	1	3.5e-08	4.8	1
4.2	8.6e-08	1	4.2	2.445e-08	1	4.2	2.71e-11	1	4.2	8.2e-09	1	4.2	2.34333e-09	1	4.2	-1.5e-14	1	-5.1	4.33333e-07	1	4.2	1	-1.03e-13	4.2	1	1.13333e-10	4.2	1	1.54667e-10	4.2	1	2.02667e-10	-54.4	1	-7.63333e-13	-54.4	1	6.16667e-13	-54.4	1	1.65667e-12	-54.4	1	6.8e-12	4.2	1	3.4e-08	4.2	1
3.6	7.8e-08	1	3.6	2.16e-08	1	3.6	2.22e-11	1	3.6	7.33333e-09	1	3.6	1.86333e-09	1	3.6	-7e-15	1	-5.8	4.13333e-07	1	3.6	1	-1.57e-13	3.6	1	1.14e-10	3.6	1	1.51333e-10	3.6	1	1.93e-10	-55.2	1	3.43333e-12	-55.2	1	5.33333e-13	-55.2	1	2.42333e-12	-55.2	1	6.7e-12	3.6	1	3.25667e-08	3.6	1
3	7.05e-08	1	3	1.965e-08	1	3	1.315e-11	1	3	6.6e-09	1	3	1.46e-09	1	3	-4.4e-14	1	-6.5	3.9e-07	1	3	1	-1.85333e-13	3	1	1.13333e-10	3	1	1.51333e-10	3	1	1.86e-10	-56	1	-6.86667e-13	-56	1	4.83333e-13	-56	1	1.84667e-12	-56	1	6.9e-12	3	1	3.13e-08	3	1
2.4	6.45e-08	1	2.4	1.72e-08	1	2.4	7.5e-12	1	2.4	5.93333e-09	1	2.4	1.09333e-09	1	2.4	7e-15	1	-7.2	3.7e-07	1	2.4	1	-2.13667e-13	2.4	1	1.13e-10	2.4	1	1.5e-10	2.4	1	1.83333e-10	-56.8	1	2.03333e-12	-56.8	1	5.23333e-13	-56.8	1	2.78333e-12	-56.8	1	6.43333e-12	2.4	1	2.95667e-08	2.4	1
1.8	5.9e-08	1	1.8	1.495e-08	1	1.8	4.01e-12	1	1.8	5.33333e-09	1	1.8	8.4e-10	1	1.8	8.33333e-15	1	-7.9	3.5e-07	1	1.8	1	-2.17667e-13	1.8	1	1.14333e-10	1.8	1	1.51e-10	1.8	1	1.79e-10	-57.6	1	-2.97e-13	-57.6	1	7.3e-13	-57.6	1	5.56667e-12	-57.6	1	7.1e-12	1.8	1	2.76e-08	1.8	1
1.2	5.2e-08	1	1.2	1.295e-08	1	1.2	2.015e-12	1	1.2	4.73333e-09	1	1.2	6.3e-10	1	1.2	2.66667e-15	1	-8.6	3.31333e-07	1	1.2	1	-1.99333e-13	1.2	1	1.13667e-10	1.2	1	1.50667e-10	1.2	1	1.8e-10	-58.4	1	5.3e-13	-58.4	1	9.86667e-13	-58.4	1	3.01e-12	-58.4	1	7.46667e-12	1.2	1	2.50667e-08	1.2	1
0.6	4.695e-08	1	0.6	1.12e-08	1	0.6	9.5e-13	1	0.6	4.16667e-09	1	0.6	4.56667e-10	1	0.6	-1.86667e-14	1	-9.3	3.13333e-07	1	0.6	1	-2.08e-13	0.6	1	1.14667e-10	0.6	1	1.49667e-10	0.6	1	1.77333e-10	-59.2	1	-1.48667e-12	-59.2	1	7.26667e-13	-59.2	1	3.9e-12	-59.2	1	7.03333e-12	0.6	1	2.20333e-08	0.6	1
0	4.225e-08	1	0	9.65e-09	1	0	4.265e-13	1	0	3.56667e-09	1	0	3.33333e-10	1	0	4.66667e-14	1	-10	2.95667e-07	1	0	1	-2.20667e-13	0	1	1.13e-10	0	1	1.49e-10	0	1	1.76667e-10	-60	1	1.32667e-12	-60	1	7.33333e-13	-60	1	1.31667e-12	-60	1	7.13333e-12	0	1	1.89667e-08	0	1
-0.6	3.72e-08	1	-0.6	8.25e-09	1	-0.6	1.94e-13	1	-0.6	3.16667e-09	1	-0.6	2.28333e-10	1	-0.6	1e-14	1	-10.7	2.78333e-07	1	-0.6	1	-2.23333e-13	-0.6	1	1.13667e-10	-0.6	1	1.47333e-10	-0.6	1	1.76667e-10													-0.6	1	1.62e-08	-0.6	1
-1.2	3.26e-08	1	-1.2	6.95e-09	1	-1.2	9.3e-14	1	-1.2	2.69333e-09	1	-1.2	1.54e-10	1	-1.2	3.13333e-14	1	-11.4	2.61333e-07	1	-1.2	1	-2.11e-13	-1.2	1	1.15333e-10	-1.2	1	1.46667e-10	-1.2	1	1.76333e-10													-1.2	1	1.37667e-08	-1.2	1
-1.8	2.875e-08	1	-1.8	5.75e-09	1	-1.8	5.3e-14	1	-1.8	2.32333e-09	1	-1.8	1.05e-10	1	-1.8	2.93333e-14	1	-12.1	2.46e-07	1	-1.8	1	-2.18333e-13	-1.8	1	1.12333e-10	-1.8	1	1.46333e-10	-1.8	1	1.75333e-10													-1.8	1	1.20667e-08	-1.8	1
-2.4	2.49e-08	1	-2.4	4.8e-09	1	-2.4	3.63e-14	1	-2.4	1.98667e-09	1	-2.4	7e-11	1	-2.4	9e-15	1	-12.8	2.30333e-07	1	-2.4	1	-2.06333e-13	-2.4	1	1.13667e-10	-2.4	1	1.47e-10	-2.4	1	1.73667e-10													-2.4	1	1.02333e-08	-2.4	1
-3	2.175e-08	1	-3	3.92e-09	1	-3	2.84e-14	1	-3	1.69e-09	1	-3	4.6e-11	1	-3	2.66667e-14	1	-13.5	2.15667e-07	1	-3	1	-2.09e-13	-3	1	1.14333e-10	-3	1	1.47e-10	-3	1	1.74667e-10													-3	1	8.93333e-09	-3	1
-3.6	1.935e-08	1	-3.6	3.175e-09	1	-3.6	2.53e-14	1	-3.6	1.4e-09	1	-3.6	3.21333e-11	1	-3.6	2.46667e-14	1	-14.2	2.02e-07	1	-3.6	1	-2.07e-13	-3.6	1	1.14333e-10	-3.6	1	1.46333e-10	-3.6	1	1.73333e-10													-3.6	1	7.5e-09	-3.6	1
-4.2	1.675e-08	1	-4.2	2.555e-09	1	-4.2	2.445e-14	1	-4.2	1.22667e-09	1	-4.2	2.45333e-11	1	-4.2	4.06667e-14	1	-14.9	1.88667e-07	1	-4.2	1	-2.18e-13	-4.2	1	1.14e-10	-4.2	1	1.46667e-10	-4.2	1	1.74667e-10													-4.2	1	6.3e-09	-4.2	1
-4.8	1.46e-08	1	-4.8	2.01e-09	1	-4.8	2.415e-14	1	-4.8	1.00667e-09	1	-4.8	1.82e-11	1	-4.8	2.5e-14	1	-15.6	1.76333e-07	1	-4.8	1	-2.27e-13	-4.8	1	1.12333e-10	-4.8	1	1.45e-10	-4.8	1	1.75e-10													-4.8	1	5.46667e-09	-4.8	1
-5.4	1.225e-08	1	-5.4	1.72e-09	1	-5.4	2.58e-14	1	-5.4	8.23333e-10	1	-5.4	1.57333e-11	1	-5.4	5.3e-14	1	-16.3	1.64e-07	1	-5.4	1	-2.08333e-13	-5.4	1	1.12667e-10	-5.4	1	1.44333e-10	-5.4	1	1.72667e-10													-5.4	1	4.66667e-09	-5.4	1
-6	1.08e-08	1	-6	1.32e-09	1	-6	2.52e-14	1	-6	6.63333e-10	1	-6	1.43e-11	1	-6	3.96667e-14	1	-17	1.52667e-07	1	-6	1	-2.14667e-13	-6	1	1.13333e-10	-6	1	1.46e-10	-6	1	1.72667e-10													-6	1	4.16667e-09	-6	1
-6.6	8.95e-09	1	-6.6	9.9e-10	1	-6.6	2.745e-14	1	-6.6	5.33333e-10	1	-6.6	1.34667e-11	1	-6.6	1.66667e-14	1	-17.7	1.42e-07	1	-6.6	1	-2.06333e-13	-6.6	1	1.11667e-10	-6.6	1	1.46667e-10	-6.6	1	1.71667e-10													-6.6	1	3.6e-09	-6.6	1
-7.2	8.1e-09	1	-7.2	7.25e-10	1	-7.2	2.83e-14	1	-7.2	4.23333e-10	1	-7.2	1.14333e-11	1	-7.2	3.4e-14	1	-18.4	1.31333e-07	1	-7.2	1	-1.78e-13	-7.2	1	1.11667e-10	-7.2	1	1.46333e-10	-7.2	1	1.71667e-10													-7.2	1	3.16e-09	-7.2	1
-7.8	6.45e-09	1	-7.8	5.35e-10	1	-7.8	3.02e-14	1	-7.8	3.4e-10	1	-7.8	1.06333e-11	1	-7.8	2.5e-14	1	-19.1	1.21333e-07	1	-7.8	1	-2.08333e-13	-7.8	1	1.13e-10	-7.8	1	1.45333e-10	-7.8	1	1.72333e-10													-7.8	1	2.74e-09	-7.8	1
-8.4	5.35e-09	1	-8.4	3.785e-10	1	-8.4	2.685e-14	1	-8.4	2.63333e-10	1	-8.4	9.76667e-12	1	-8.4	6e-14	1	-19.8	1.12e-07	1	-8.4	1	-2.17e-13	-8.4	1	1.12333e-10	-8.4	1	1.46e-10	-8.4	1	1.71667e-10													-8.4	1	2.35333e-09	-8.4	1
-9	4.335e-09	1	-9	2.61e-10	1	-9	2.85e-14	1	-9	1.99333e-10	1	-9	1.00333e-11	1	-9	4.83333e-14	1	-20.5	1.03667e-07	1	-9	1	-2.00333e-13	-9	1	1.13333e-10	-9	1	1.47e-10	-9	1	1.73e-10													-9	1	2.11333e-09	-9	1
-9.6	3.685e-09	1	-9.6	2.335e-10	1	-9.6	2.755e-14	1	-9.6	1.49333e-10	1	-9.6	9.43333e-12	1	-9.6	6.73333e-14	1	-21.2	9.53333e-08	1	-9.6	1	-2.15e-13	-9.6	1	1.11333e-10	-9.6	1	1.47e-10	-9.6	1	1.75333e-10													-9.6	1	1.82667e-09	-9.6	1
-10.2	3.18e-09	1	-10.2	1.545e-10	1	-10.2	3.005e-14	1	-10.2	1.26333e-10	1	-10.2	9.6e-12	1	-10.2	5.33333e-14	1	-21.9	8.73333e-08	1	-10.2	1	-1.80333e-13	-10.2	1	1.10333e-10	-10.2	1	1.47667e-10	-10.2	1	1.72e-10													-10.2	1	1.60333e-09	-10.2	1
-10.8	3.28e-09	1	-10.8	9.8e-11	1	-10.8	2.435e-14	1	-10.8	9.16667e-11	1	-10.8	8.9e-12	1	-10.8	3.06667e-14	1	-22.6	8e-08	1	-10.8	1	-2.09667e-13	-10.8	1	1.10333e-10	-10.8	1	1.47333e-10	-10.8	1	1.72333e-10													-10.8	1	1.41333e-09	-10.8	1
-11.4	2.59e-09	1	-11.4	6.1e-11	1	-11.4	3.165e-14	1	-11.4	6.2e-11	1	-11.4	9.3e-12	1	-11.4	5.53333e-14	1	-23.3	7.33333e-08	1	-11.4	1	-1.95e-13	-11.4	1	1.11333e-10	-11.4	1	1.48e-10	-11.4	1	1.70333e-10													-11.4	1	1.24667e-09	-11.4	1
-12	2.335e-09	1	-12	3.715e-11	1	-12	2.625e-14	1	-12	4.36667e-11	1	-12	8.66667e-12	1	-12	7.06667e-14	1	-24	6.66667e-08	1	-12	1	-2.14667e-13	-12	1	1.11e-10	-12	1	1.47e-10	-12	1	1.72e-10													-12	1	1.13e-09	-12	1
-12.6	2.31e-09	1	-12.6	2.215e-11	1	-12.6	3.14e-14	1	-12.6	2.80333e-11	1	-12.6	8.76667e-12	1	-12.6	4.7e-14	1	-24.7	6.1e-08	1	-12.6	1	-1.61e-13	-12.6	1	1.10667e-10	-12.6	1	1.48e-10	-12.6	1	1.73e-10													-12.6	1	1.00667e-09	-12.6	1
-13.2	2.325e-09	1	-13.2	2.605e-11	1	-13.2	2.745e-14	1	-13.2	1.81333e-11	1	-13.2	8.56667e-12	1	-13.2	8.4e-14	1	-25.4	5.53333e-08	1	-13.2	1	-1.94333e-13	-13.2	1	1.09e-10	-13.2	1	1.49667e-10	-13.2	1	1.73e-10													-13.2	1	9.46667e-10	-13.2	1
-13.8	2.24e-09	1	-13.8	1.79e-11	1	-13.8	2.94e-14	1	-13.8	1.57667e-11	1	-13.8	8.93333e-12	1	-13.8	7.93333e-14	1	-26.1	5e-08	1	-13.8	1	-1.82667e-13	-13.8	1	1.08333e-10	-13.8	1	1.50667e-10	-13.8	1	1.73333e-10													-13.8	1	9.36667e-10	-13.8	1
-14.4	1.9e-09	1	-14.4	8.95e-12	1	-14.4	2.59e-14	1	-14.4	8.86667e-12	1	-14.4	8.43333e-12	1	-14.4	7.53333e-14	1	-26.8	4.5e-08	1	-14.4	1	-1.86667e-13	-14.4	1	1.09333e-10	-14.4	1	1.52333e-10	-14.4	1	1.74667e-10													-14.4	1	8.16667e-10	-14.4	1
-15	1.955e-09	1	-15	4.555e-12	1	-15	3.065e-14	1	-15	5.5e-12	1	-15	8.5e-12	1	-15	7.43333e-14	1	-27.5	4.06667e-08	1	-15	1	-1.92e-13	-15	1	1.09e-10	-15	1	1.52e-10	-15	1	1.75e-10													-15	1	8.26667e-10	-15	1
-15.6	1.885e-09	1	-15.6	2.43e-12	1	-15.6	2.78e-14	1	-15.6	2.90333e-12	1	-15.6	8e-12	1	-15.6	6.23333e-14	1	-28.2	3.63333e-08	1	-15.6	1	-1.99e-13	-15.6	1	1.1e-10	-15.6	1	1.51333e-10	-15.6	1	1.72e-10													-15.6	1	7.06667e-10	-15.6	1
-16.2	1.96e-09	1	-16.2	1.295e-12	1	-16.2	2.825e-14	1	-16.2	1.54667e-12	1	-16.2	8.8e-12	1	-16.2	5.63333e-14	1	-28.9	3.25333e-08	1	-16.2	1	-1.93333e-13	-16.2	1	1.09e-10	-16.2	1	1.53333e-10	-16.2	1	1.71333e-10													-16.2	1	6.9e-10	-16.2	1
-16.8	1.84e-09	1	-16.8	7.3e-13	1	-16.8	2.87e-14	1	-16.8	7.53333e-13	1	-16.8	7.96667e-12	1	-16.8	6.1e-14	1	-29.6	2.9e-08	1	-16.8	1	-1.95e-13	-16.8	1	1.09667e-10	-16.8	1	1.53e-10	-16.8	1	1.72333e-10													-16.8	1	6.63333e-10	-16.8	1
-17.4	1.92e-09	1	-17.4	4.245e-13	1	-17.4	2.74e-14	1	-17.4	3.86667e-13	1	-17.4	8.13333e-12	1	-17.4	8.5e-14	1	-30.3	2.57667e-08	1	-17.4	1	-2.12333e-13	-17.4	1	1.08667e-10	-17.4	1	1.53667e-10	-17.4	1	1.69333e-10													-17.4	1	6.43333e-10	-17.4	1
-18	1.795e-09	1	-18	2.64e-13	1	-18	2.885e-14	1	-18	2.11333e-13	1	-18	8.2e-12	1	-18	4e-14	1	-31	2.27667e-08	1	-18	1	-1.98333e-13	-18	1	1.11e-10	-18	1	1.52333e-10	-18	1	1.71333e-10													-18	1	6.26667e-10	-18	1
-18.6	1.89e-09	1	-18.6	1.815e-13	1	-18.6	2.58e-14	1	-18.6	1.12667e-13	1	-18.6	8.46667e-12	1	-18.6	6.6e-14	1	-31.7	2.00333e-08	1	-18.6	1	-2.01333e-13	-18.6	1	1.11e-10	-18.6	1	1.52333e-10	-18.6	1	1.71333e-10													-18.6	1	5.9e-10	-18.6	1
-19.2	2.08e-09	1	-19.2	1.25e-13	1	-19.2	3.16e-14	1	-19.2	6.9e-14	1	-19.2	6.83333e-12	1	-19.2	7.86667e-14	1	-32.4	1.75e-08	1	-19.2	1	-1.95667e-13	-19.2	1	1.11333e-10	-19.2	1	1.51667e-10	-19.2	1	1.70333e-10													-19.2	1	5.83333e-10	-19.2	1
-19.8	2.085e-09	1	-19.8	1.03e-13	1	-19.8	2.7e-14	1	-19.8	4.26667e-14	1	-19.8	7.56667e-12	1	-19.8	8.7e-14	1	-33.1	1.53333e-08	1	-19.8	1	-1.81e-13	-19.8	1	1.12333e-10	-19.8	1	1.49333e-10	-19.8	1	1.69667e-10													-19.8	1	5.63333e-10	-19.8	1
-20.4	2.155e-09	1	-20.4	8.45e-14	1	-20.4	2.95e-14	1	-20.4	3.19667e-14	1	-20.4	7.86667e-12	1	-20.4	5.96667e-14	1	-33.8	1.32333e-08	1	-20.4	1	-1.86e-13	-20.4	1	1.13e-10	-20.4	1	1.49e-10	-20.4	1	1.68333e-10													-20.4	1	5.66667e-10	-20.4	1
-21	1.66e-09	1	-21	7.35e-14	1	-21	2.58e-14	1	-21	2.21333e-14	1	-21	7.7e-12	1	-21	6.5e-14	1	-34.5	1.14333e-08	1	-21	1	-2.16333e-13	-21	1	1.11333e-10	-21	1	1.47333e-10	-21	1	1.69333e-10													-21	1	5.4e-10	-21	1
-21.6	1.585e-09	1	-21.6	7.15e-14	1	-21.6	2.935e-14	1	-21.6	2.35e-14	1	-21.6	7.83333e-12	1	-21.6	4.86667e-14	1	-35.2	9.83333e-09	1	-21.6	1	-1.90667e-13	-21.6	1	1.12333e-10	-21.6	1	1.46333e-10	-21.6	1	1.71e-10													-21.6	1	5.2e-10	-21.6	1
-22.2	1.55e-09	1	-22.2	6.8e-14	1	-22.2	2.61e-14	1	-22.2	2.04333e-14	1	-22.2	7.1e-12	1	-22.2	9.1e-14	1	-35.9	8.33333e-09	1	-22.2	1	-2.05667e-13	-22.2	1	1.12333e-10	-22.2	1	1.47667e-10	-22.2	1	1.7e-10													-22.2	1	5.06667e-10	-22.2	1
-22.8	1.77e-09	1	-22.8	6.3e-14	1	-22.8	2.465e-14	1	-22.8	2.00667e-14	1	-22.8	6.93333e-12	1	-22.8	6.23333e-14	1	-36.6	7.06667e-09	1	-22.8	1	-1.97e-13	-22.8	1	1.13333e-10	-22.8	1	1.47667e-10	-22.8	1	1.71333e-10													-22.8	1	4.8e-10	-22.8	1
-23.4	1.77e-09	1	-23.4	6.15e-14	1	-23.4	2.955e-14	1	-23.4	1.97333e-14	1	-23.4	7.1e-12	1	-23.4	8.33333e-14	1	-37.3	5.93333e-09	1	-23.4	1	-2.1e-13	-23.4	1	1.13e-10	-23.4	1	1.45667e-10	-23.4	1	1.72667e-10													-23.4	1	4.6e-10	-23.4	1
-24	1.625e-09	1	-24	5.95e-14	1	-24	2.51e-14	1	-24	2.08e-14	1	-24	7.53333e-12	1	-24	7.66667e-14	1	-38	4.93333e-09	1	-24	1	-1.97667e-13	-24	1	1.12e-10	-24	1	1.45667e-10	-24	1	1.71667e-10													-24	1	4.36667e-10	-24	1
-24.6	1.685e-09	1	-24.6	5.55e-14	1	-24.6	2.96e-14	1	-24.6	1.77667e-14	1	-24.6	7.36667e-12	1	-24.6	7.83333e-14	1	-38.7	4.06667e-09	1	-24.6	1	-1.77333e-13	-24.6	1	1.12667e-10	-24.6	1	1.45667e-10	-24.6	1	1.72667e-10													-24.6	1	3.96667e-10	-24.6	1
-25.2	1.415e-09	1	-25.2	5.35e-14	1	-25.2	2.415e-14	1	-25.2	1.79667e-14	1	-25.2	7.33333e-12	1	-25.2	8.16667e-14	1	-39.4	3.31e-09	1	-25.2	1	-2.2e-13	-25.2	1	1.12667e-10	-25.2	1	1.45333e-10	-25.2	1	1.73333e-10													-25.2	1	3.5e-10	-25.2	1
-25.8	1.53e-09	1	-25.8	5.15e-14	1	-25.8	3.065e-14	1	-25.8	1.86333e-14	1	-25.8	6.26667e-12	1	-25.8	7.46667e-14	1	-40.1	2.75e-09	1	-25.8	1	-1.80333e-13	-25.8	1	1.14e-10	-25.8	1	1.45333e-10	-25.8	1	1.71667e-10													-25.8	1	3.24667e-10	-25.8	1
-26.4	1.62e-09	1	-26.4	5.8e-14	1	-26.4	2.705e-14	1	-26.4	1.76e-14	1	-26.4	7.06667e-12	1	-26.4	4.73333e-14	1	-40.8	2.17e-09	1	-26.4	1	-1.95e-13	-26.4	1	1.13333e-10	-26.4	1	1.45333e-10	-26.4	1	1.73667e-10													-26.4	1	2.97e-10	-26.4	1
-27	1.74e-09	1	-27	4.91e-14	1	-27	2.79e-14	1	-27	2.03e-14	1	-27	7.33333e-12	1	-27	8.23333e-14	1	-41.5	1.70333e-09	1	-27	1	-1.89333e-13	-27	1	1.13e-10	-27	1	1.46333e-10	-27	1	1.74667e-10													-27	1	2.63e-10	-27	1
-27.6	1.735e-09	1	-27.6	5.4e-14	1	-27.6	2.975e-14	1	-27.6	1.87e-14	1	-27.6	6.56667e-12	1	-27.6	7.56667e-14	1	-42.2	1.31333e-09	1	-27.6	1	-2.03333e-13	-27.6	1	1.13667e-10	-27.6	1	1.44667e-10	-27.6	1	1.75333e-10													-27.6	1	2.45333e-10	-27.6	1
-28.2	1.4e-09	1	-28.2	4.755e-14	1	-28.2	2.93e-14	1	-28.2	2.03667e-14	1	-28.2	7.03333e-12	1	-28.2	1.09333e-13	1	-42.9	9.93333e-10	1	-28.2	1	-1.95e-13	-28.2	1	1.14667e-10	-28.2	1	1.45667e-10	-28.2	1	1.74333e-10													-28.2	1	2.12667e-10	-28.2	1
-28.8	1.53e-09	1	-28.8	5.5e-14	1	-28.8	2.97e-14	1	-28.8	1.89333e-14	1	-28.8	6.8e-12	1	-28.8	8.56667e-14	1	-43.6	7.46667e-10	1	-28.8	1	-2.16333e-13	-28.8	1	1.16e-10	-28.8	1	1.45e-10	-28.8	1	1.76e-10													-28.8	1	1.71333e-10	-28.8	1
-29.4	1.37e-09	1	-29.4	4.71e-14	1	-29.4	3.055e-14	1	-29.4	1.99e-14	1	-29.4	6.63333e-12	1	-29.4	8.13333e-14	1	-44.3	5.46667e-10	1	-29.4	1	-1.86667e-13	-29.4	1	1.16333e-10	-29.4	1	1.45e-10	-29.4	1	1.76e-10													-29.4	1	1.43e-10	-29.4	1
-30	1.48e-09	1	-30	5.2e-14	1	-30	3.23e-14	1	-30	2.14333e-14	1	-30	6.96667e-12	1	-30	7.86667e-14	1	-45	3.86667e-10	1	-30	1	-2.17333e-13	-30	1	1.17333e-10	-30	1	1.46e-10	-30	1	1.76e-10													-30	1	1.26667e-10	-30	1
-30.6	1.405e-09	1	-30.6	4.415e-14	1	-30.6	2.81e-14	1	-30.6	2.16333e-14	1	-30.6	7e-12	1	-30.6	9.43333e-14	1	-45.7	2.84e-10	1	-30.6	1	-1.99333e-13	-30.6	1	1.16667e-10	-30.6	1	1.43e-10	-30.6	1	1.76667e-10													-30.6	1	1.03333e-10	-30.6	1
-31.2	1.525e-09	1	-31.2	4.84e-14	1	-31.2	3.2e-14	1	-31.2	2.16e-14	1	-31.2	6.46667e-12	1	-31.2	8.26667e-14	1	-46.4	1.9e-10	1	-31.2	1	-1.85333e-13	-31.2	1	1.16e-10	-31.2	1	1.43333e-10	-31.2	1	1.75333e-10													-31.2	1	7.9e-11	-31.2	1
-31.8	1.505e-09	1	-31.8	4.445e-14	1	-31.8	2.565e-14	1	-31.8	2.09e-14	1	-31.8	5.9e-12	1	-31.8	8.5e-14	1	-47.1	1.26e-10	1	-31.8	1	-1.98667e-13	-31.8	1	1.17333e-10	-31.8	1	1.47333e-10	-31.8	1	1.77333e-10													-31.8	1	5.63333e-11	-31.8	1
-32.4	1.405e-09	1	-32.4	4.8e-14	1	-32.4	3.215e-14	1	-32.4	2.09e-14	1	-32.4	6.1e-12	1	-32.4	1.01333e-13	1	-47.8	8.2e-11	1	-32.4	1	-1.97333e-13	-32.4	1	1.17e-10	-32.4	1	1.46333e-10	-32.4	1	1.77e-10													-32.4	1	4.13333e-11	-32.4	1
-33	1.31e-09	1	-33	4.635e-14	1	-33	2.985e-14	1	-33	2.17667e-14	1	-33	6e-12	1	-33	5.5e-14	1	-48.5	5.26667e-11	1	-33	1	-2.13e-13	-33	1	1.17e-10	-33	1	1.43333e-10	-33	1	1.77667e-10													-33	1	3.86667e-11	-33	1
-33.6	1.33e-09	1	-33.6	4.57e-14	1	-33.6	3.37e-14	1	-33.6	2.00667e-14	1	-33.6	6.23333e-12	1	-33.6	8.36667e-14	1	-49.2	3.53333e-11	1	-33.6	1	-1.86667e-13	-33.6	1	1.17e-10	-33.6	1	1.41333e-10	-33.6	1	1.77667e-10													-33.6	1	3.00667e-11	-33.6	1
-34.2	1.42e-09	1	-34.2	4.66e-14	1	-34.2	3.245e-14	1	-34.2	2.05667e-14	1	-34.2	6.33333e-12	1	-34.2	6.06667e-14	1	-49.9	2.36667e-11	1	-34.2	1	-2.01e-13	-34.2	1	1.16667e-10	-34.2	1	1.44667e-10	-34.2	1	1.76667e-10													-34.2	1	2.64667e-11	-34.2	1
-34.8	1.4e-09	1	-34.8	4.38e-14	1	-34.8	3.185e-14	1	-34.8	1.95333e-14	1	-34.8	5.9e-12	1	-34.8	9.7e-14	1	-50.6	1.64e-11	1	-34.8	1	-1.73667e-13	-34.8	1	1.16667e-10	-34.8	1	1.43333e-10	-34.8	1	1.75e-10													-34.8	1	1.33667e-11	-34.8	1
-35.4	1.525e-09	1	-35.4	4.87e-14	1	-35.4	3.19e-14	1	-35.4	2.17e-14	1	-35.4	5.96667e-12	1	-35.4	1.01e-13	1	-51.3	1.14e-11	1	-35.4	1	-1.99667e-13	-35.4	1	1.17e-10	-35.4	1	1.43667e-10	-35.4	1	1.76e-10													-35.4	1	1.25333e-11	-35.4	1
-36	1.62e-09	1	-36	4.355e-14	1	-36	3.1e-14	1	-36	2.08333e-14	1	-36	6.53333e-12	1	-36	7.2e-14	1	-52	8.1e-12	1	-36	1	-1.86667e-13	-36	1	1.16333e-10	-36	1	1.41333e-10	-36	1	1.78333e-10													-36	1	9.96667e-12	-36	1
-36.6	1.545e-09	1	-36.6	4.695e-14	1	-36.6	3.24e-14	1	-36.6	2.3e-14	1	-36.6	6.1e-12	1	-36.6	7.93333e-14	1	-52.7	5.9e-12	1	-36.6	1	-2.16333e-13	-36.6	1	1.16667e-10	-36.6	1	1.42333e-10	-36.6	1	1.75333e-10													-36.6	1	9.23333e-12	-36.6	1
-37.2	1.41e-09	1	-37.2	4.04e-14	1	-37.2	2.93e-14	1	-37.2	1.97667e-14	1	-37.2	6.23333e-12	1	-37.2	1.04333e-13	1	-53.4	4.16667e-12	1	-37.2	1	-1.85333e-13	-37.2	1	1.16667e-10	-37.2	1	1.42333e-10	-37.2	1	1.75667e-10													-37.2	1	1.02e-11	-37.2	1
-37.8	1.5e-09	1	-37.8	4.915e-14	1	-37.8	3.255e-14	1	-37.8	2.23333e-14	1	-37.8	6.06667e-12	1	-37.8	9.16667e-14	1	-54.1	3.04e-12	1	-37.8	1	-1.91e-13	-37.8	1	1.16333e-10	-37.8	1	1.4e-10	-37.8	1	1.74e-10													-37.8	1	4.63333e-12	-37.8	1
-38.4	1.57e-09	1	-38.4	4.1e-14	1	-38.4	2.925e-14	1	-38.4	2.25667e-14	1	-38.4	6.23333e-12	1	-38.4	8.36667e-14	1	-54.8	2.12667e-12	1	-38.4	1	-2.03e-13	-38.4	1	1.17e-10	-38.4	1	1.42e-10	-38.4	1	1.75667e-10													-38.4	1	2.53e-12	-38.4	1
-39	1.315e-09	1	-39	4.545e-14	1	-39	3.38e-14	1	-39	2.34333e-14	1	-39	6.23333e-12	1	-39	1.07667e-13	1	-55.5	1.48333e-12	1	-39	1	-2.01667e-13	-39	1	1.17e-10	-39	1	1.40333e-10	-39	1	1.76333e-10													-39	1	2.66667e-12	-39	1
-39.6	1.595e-09	1	-39.6	4.415e-14	1	-39.6	3.145e-14	1	-39.6	2.18e-14	1	-39.6	5.56667e-12	1	-39.6	8.56667e-14	1	-56.2	9.56667e-13	1	-39.6	1	-1.94333e-13	-39.6	1	1.16333e-10	-39.6	1	1.39333e-10	-39.6	1	1.77333e-10													-39.6	1	-2.14e-13	-39.6	1
-40.2	1.795e-09	1	-40.2	4.585e-14	1	-40.2	2.885e-14	1	-40.2	2.7e-14	1	-40.2	6.43333e-12	1	-40.2	1.02e-13	1	-56.9	6.9e-13	1	-40.2	1	-1.72333e-13	-40.2	1	1.15667e-10	-40.2	1	1.41e-10	-40.2	1	1.74333e-10													-40.2	1	2.29333e-13	-40.2	1
-40.8	1.56e-09	1	-40.8	4.39e-14	1	-40.8	3.04e-14	1	-40.8	2.38667e-14	1	-40.8	6.26667e-12	1	-40.8	1.12667e-13	1	-57.6	4e-13	1	-40.8	1	-2e-13	-40.8	1	1.15667e-10	-40.8	1	1.39333e-10	-40.8	1	1.76e-10													-40.8	1	6.26667e-12	-40.8	1
-41.4	1.5e-09	1	-41.4	4.105e-14	1	-41.4	3.625e-14	1	-41.4	2.71667e-14	1	-41.4	5.46667e-12	1	-41.4	1.22333e-13	1	-58.3	3.36667e-13	1	-41.4	1	-1.73667e-13	-41.4	1	1.15333e-10	-41.4	1	1.39667e-10	-41.4	1	1.75e-10													-41.4	1	4.9e-12	-41.4	1
-42	1.46e-09	1	-42	4.805e-14	1	-42	3.105e-14	1	-42	2.58e-14	1	-42	5.96667e-12	1	-42	9.73333e-14	1	-59	1.74e-13	1	-42	1	-1.95e-13	-42	1	1.15333e-10	-42	1	1.40667e-10	-42	1	1.74667e-10													-42	1	4.33333e-12	-42	1
-42.6	1.15e-09	1	-42.6	4.35e-14	1	-42.6	3.675e-14	1	-42.6	2.78667e-14	1	-42.6	6.1e-12	1	-42.6	1.03333e-13	1	-59.7	1.41667e-13	1	-42.6	1	-1.76e-13	-42.6	1	1.16333e-10	-42.6	1	1.40333e-10	-42.6	1	1.74667e-10													-42.6	1	7.3e-12	-42.6	1
-43.2	1.445e-09	1	-43.2	4.9e-14	1	-43.2	3.575e-14	1	-43.2	2.51333e-14	1	-43.2	6.33333e-12	1	-43.2	8.73333e-14	1	-60.4	3.8e-14	1	-43.2	1	-2.16667e-13	-43.2	1	1.16333e-10	-43.2	1	1.4e-10	-43.2	1	1.75333e-10													-43.2	1	8.26667e-13	-43.2	1
-43.8	1.43e-09	1	-43.8	4.105e-14	1	-43.8	3.52e-14	1	-43.8	2.99333e-14	1	-43.8	5.76667e-12	1	-43.8	7.46667e-14	1	-61.1	4.43333e-14	1	-43.8	1	-1.58667e-13	-43.8	1	1.14e-10	-43.8	1	1.4e-10	-43.8	1	1.75333e-10													-43.8	1	1.89667e-13	-43.8	1
-44.4	1.41e-09	1	-44.4	5.05e-14	1	-44.4	3.165e-14	1	-44.4	3e-14	1	-44.4	5.86667e-12	1	-44.4	8.83333e-14	1	-61.8	-2.76667e-14	1	-44.4	1	-2.05333e-13	-44.4	1	1.15e-10	-44.4	1	1.39333e-10	-44.4	1	1.75e-10													-44.4	1	2.44667e-12	-44.4	1
-45	1.375e-09	1	-45	3.94e-14	1	-45	3.71e-14	1	-45	3.63333e-14	1	-45	5.7e-12	1	-45	7.26667e-14	1	-62.5	-1.2e-14	1	-45	1	-1.85667e-13	-45	1	1.15e-10	-45	1	1.4e-10	-45	1	1.74333e-10													-45	1	6.93333e-12	-45	1
-45.6	1.405e-09	1	-45.6	4.785e-14	1	-45.6	3.415e-14	1	-45.6	3.36667e-14	1	-45.6	5.53333e-12	1	-45.6	1.36667e-13	1	-63.2	-1.86667e-14	1	-45.6	1	-1.95333e-13	-45.6	1	1.15333e-10	-45.6	1	1.37333e-10	-45.6	1	1.74667e-10													-45.6	1	4.06667e-12	-45.6	1
-46.2	1.385e-09	1	-46.2	4.3e-14	1	-46.2	3.715e-14	1	-46.2	3.83333e-14	1	-46.2	5.76667e-12	1	-46.2	9.16667e-14	1	-63.9	-7.33333e-14	1	-46.2	1	-2.14333e-13	-46.2	1	1.16333e-10	-46.2	1	1.37e-10	-46.2	1	1.75e-10													-46.2	1	1.85667e-12	-46.2	1
-46.8	1.33e-09	1	-46.8	4.39e-14	1	-46.8	3.33e-14	1	-46.8	3.7e-14	1	-46.8	6.13333e-12	1	-46.8	1.09333e-13	1	-64.6	-1.53333e-14	1	-46.8	1	-1.68e-13	-46.8	1	1.16e-10	-46.8	1	1.37333e-10	-46.8	1	1.72667e-10													-46.8	1	-1.55667e-12	-46.8	1
-47.4	1.33e-09	1	-47.4	4.625e-14	1	-47.4	3.72e-14	1	-47.4	4.76667e-14	1	-47.4	5.86667e-12	1	-47.4	8.86667e-14	1	-65.3	-6.23333e-14	1	-47.4	1	-1.95333e-13	-47.4	1	1.15667e-10	-47.4	1	1.35667e-10	-47.4	1	1.72667e-10													-47.4	1	6.23333e-12	-47.4	1
-48	1.51e-09	1	-48	4.39e-14	1	-48	3.38e-14	1	-48	4.46667e-14	1	-48	5.93333e-12	1	-48	1.27667e-13	1	-66	-4.3e-14	1	-48	1	-1.67667e-13	-48	1	1.16333e-10	-48	1	1.35667e-10	-48	1	1.74e-10													-48	1	-3e-12	-48	1
-48.6	1.43e-09	1	-48.6	4.56e-14	1	-48.6	3.805e-14	1	-48.6	4.83333e-14	1	-48.6	5.73333e-12	1	-48.6	9.5e-14	1	-66.7	-1.10333e-13	1	-48.6	1	-2.22e-13	-48.6	1	1.16e-10	-48.6	1	1.36333e-10	-48.6	1	1.71333e-10													-48.6	1	-4.8e-12	-48.6	1
-49.2	1.42e-09	1	-49.2	3.96e-14	1	-49.2	3.455e-14	1	-49.2	5.23333e-14	1	-49.2	5.76667e-12	1	-49.2	1.04333e-13	1	-67.4	-3.03333e-14	1	-49.2	1	-1.67667e-13	-49.2	1	1.17333e-10	-49.2	1	1.35667e-10	-49.2	1	1.72667e-10													-49.2	1	-4.96667e-12	-49.2	1
-49.8	1.4e-09	1	-49.8	4.685e-14	1	-49.8	4.025e-14	1	-49.8	4.96667e-14	1	-49.8	5.36667e-12	1	-49.8	1.29e-13	1	-68.1	-9.43333e-14	1	-49.8	1	-1.79667e-13	-49.8	1	1.16667e-10	-49.8	1	1.36333e-10	-49.8	1	1.73e-10													-49.8	1	-6.53333e-12	-49.8	1
-50.4	1.58e-09	1	-50.4	3.86e-14	1	-50.4	3.45e-14	1	-50.4	5.36667e-14	1	-50.4	5.66667e-12	1	-50.4	1.24667e-13	1	-68.8	-5.8e-14	1	-50.4	1	-1.77e-13	-50.4	1	1.17333e-10	-50.4	1	1.37e-10	-50.4	1	1.72333e-10													-50.4	1	-7.1e-12	-50.4	1
-51	1.32e-09	1	-51	4.935e-14	1	-51	4.12e-14	1	-51	4.73333e-14	1	-51	5.46667e-12	1	-51	9.86667e-14	1	-69.5	-6.96667e-14	1	-51	1	-1.81667e-13	-51	1	1.16667e-10	-51	1	1.35e-10	-51	1	1.72667e-10													-51	1	-6.4e-12	-51	1
-51.6	1.335e-09	1	-51.6	4.06e-14	1	-51.6	3.575e-14	1	-51.6	5.46667e-14	1	-51.6	5.73333e-12	1	-51.6	1.16667e-13	1	-70.2	-7.13333e-14	1	-51.6	1	-1.80333e-13	-51.6	1	1.15e-10	-51.6	1	1.35333e-10	-51.6	1	1.73667e-10													-51.6	1	4.76667e-13	-51.6	1
-52.2	1.45e-09	1	-52.2	4.91e-14	1	-52.2	4e-14	1	-52.2	5.8e-14	1	-52.2	6.33333e-12	1	-52.2	1.13e-13	1	-70.9	-6.5e-14	1	-52.2	1	-2.16e-13	-52.2	1	1.16e-10	-52.2	1	1.36e-10	-52.2	1	1.72333e-10													-52.2	1	2.07667e-12	-52.2	1
-52.8	1.545e-09	1	-52.8	4.155e-14	1	-52.8	3.68e-14	1	-52.8	4.73333e-14	1	-52.8	5.86667e-12	1	-52.8	1.1e-13	1	-71.6	-8.63333e-14	1	-52.8	1	-1.91333e-13	-52.8	1	1.15333e-10	-52.8	1	1.36667e-10	-52.8	1	1.72667e-10													-52.8	1	-5.03333e-12	-52.8	1
-53.4	1.51e-09	1	-53.4	4.73e-14	1	-53.4	4.32e-14	1	-53.4	3.5e-14	1	-53.4	5.66667e-12	1	-53.4	1.03333e-13	1	-72.3	-4.73333e-14	1	-53.4	1	-1.93667e-13	-53.4	1	1.14667e-10	-53.4	1	1.36667e-10	-53.4	1	1.70667e-10													-53.4	1	-1.06667e-12	-53.4	1
-54	1.57e-09	1	-54	4.335e-14	1	-54	3.51e-14	1	-54	5.1e-14	1	-54	5.56667e-12	1	-54	1.18e-13	1	-73	-1.11667e-13	1	-54	1	-1.88667e-13	-54	1	1.14333e-10	-54	1	1.37333e-10	-54	1	1.70333e-10													-54	1	-1.18e-12	-54	1
-54.6	1.71e-09	1	-54.6	4.615e-14	1	-54.6	3.83e-14	1	-54.6	4.8e-14	1	-54.6	5.53333e-12	1	-54.6	1.07667e-13	1	-73.7	-2.66667e-14	1	-54.6	1	-1.45333e-13	-54.6	1	1.14e-10	-54.6	1	1.38e-10	-54.6	1	1.70333e-10													-54.6	1	-5.83333e-12	-54.6	1
-55.2	1.81e-09	1	-55.2	4.675e-14	1	-55.2	3.6e-14	1	-55.2	5.63333e-14	1	-55.2	5.9e-12	1	-55.2	1.39333e-13	1	-74.4	-1.11667e-13	1	-55.2	1	-2.07333e-13	-55.2	1	1.13667e-10	-55.2	1	1.38333e-10	-55.2	1	1.71333e-10													-55.2	1	-1.31e-12	-55.2	1
-55.8	1.655e-09	1	-55.8	4.16e-14	1	-55.8	3.885e-14	1	-55.8	5.86667e-14	1	-55.8	5.73333e-12	1	-55.8	1.1e-13	1	-75.1	-2.06667e-14	1	-55.8	1	-1.34e-13	-55.8	1	1.14333e-10	-55.8	1	1.40333e-10	-55.8	1	1.68e-10													-55.8	1	1.80667e-13	-55.8	1
-56.4	1.66e-09	1	-56.4	4.685e-14	1	-56.4	3.65e-14	1	-56.4	6.56667e-14	1	-56.4	6e-12	1	-56.4	1.41333e-13	1	-75.8	-7.4e-14	1	-56.4	1	-2.03e-13	-56.4	1	1.15333e-10	-56.4	1	1.43667e-10	-56.4	1	1.70333e-10													-56.4	1	-2.23e-12	-56.4	1
-57	1.615e-09	1	-57	4.535e-14	1	-57	4.26e-14	1	-57	6.33333e-14	1	-57	6.03333e-12	1	-57	9.43333e-14	1	-76.5	5.66667e-15	1	-57	1	-1.54333e-13	-57	1	1.14e-10	-57	1	1.41e-10	-57	1	1.70667e-10													-57	1	-6.56667e-13	-57	1
-57.6	1.72e-09	1	-57.6	4.98e-14	1	-57.6	3.9e-14	1	-57.6	6.13333e-14	1	-57.6	5.7e-12	1	-57.6	1.39333e-13	1	-77.2	-1.00667e-13	1	-57.6	1	-2.11e-13	-57.6	1	1.14667e-10	-57.6	1	1.43667e-10	-57.6	1	1.71667e-10													-57.6	1	1.50667e-12	-57.6	1
-58.2	1.52e-09	1	-58.2	4.22e-14	1	-58.2	4.125e-14	1	-58.2	6.2e-14	1	-58.2	5.86667e-12	1	-58.2	1.29333e-13	1	-77.9	-1.53333e-14	1	-58.2	1	-1.63667e-13	-58.2	1	1.15333e-10	-58.2	1	1.42333e-10	-58.2	1	1.70333e-10													-58.2	1	3.66667e-12	-58.2	1
-58.8	1.475e-09	1	-58.8	5.05e-14	1	-58.8	3.945e-14	1	-58.8	6.83333e-14	1	-58.8	6.66667e-12	1	-58.8	1.59667e-13	1	-78.6	-9.7e-14	1	-58.8	1	-2.01667e-13	-58.8	1	1.15e-10	-58.8	1	1.43667e-10	-58.8	1	1.70667e-10													-58.8	1	-2.30667e-12	-58.8	1
-59.4	1.715e-09	1	-59.4	4.23e-14	1	-59.4	4.3e-14	1	-59.4	5.1e-14	1	-59.4	6.03333e-12	1	-59.4	1.31333e-13	1	-79.3	-2.43333e-14	1	-59.4	1	-1.59e-13	-59.4	1	1.15333e-10	-59.4	1	1.42667e-10	-59.4	1	1.68e-10													-59.4	1	-2.22e-12	-59.4	1
-60	1.49e-09	1	-60	4.785e-14	1	-60	3.93e-14	1	-60	5.43333e-14	1	-60	6.06667e-12	1	-60	1.65667e-13	1	-80	-9.36667e-14	1	-60	1	-1.71333e-13	-60	1	1.16e-10	-60	1	1.42e-10	-60	1	1.69e-10													-60	1	-4.1e-12	-60	1
[truncated: 208 more columns]

## Sheet: F5e-h-vdW
no. 1			no.2			no.3			no.4			no.5			no.6			no.7			no.8			no.9			no.10			no.11			no.12			no.13			no.14			no.15			no.16			no.17
Vgs（V）	vds（V）	Id (A/μm)	Vgs（V）	vds（V）	Id (A/μm)	Vgs（V）	vds（V）	Id (A/μm)	Vgs（V）	vds（V）	Id (A/μm)	Vgs（V）	vds（V）	Id (A/μm)	Vgs（V）	vds（V）	Id (A/μm)	Vgs（V）	vds（V）	Id (A/μm)	Vgs（V）	vds（V）	Id (A/μm)	Vgs（V）	vds（V）	Id (A/μm)	Vgs（V）	vds（V）	Id (A/μm)	Vgs（V）	vds（V）	Id (A/μm)	Vgs（V）	vds（V）	Id (A/μm)	Vgs（V）	vds（V）	Id (A/μm)	Vgs（V）	vds（V）	Id (A/μm)	Vgs（V）	vds（V）	Id (A/μm)	Vgs（V）	vds（V）	Id (A/μm)	Vgs（V）	vds（V）
-60	1	1.54667e-14	-60	1	9.25e-14	-60	1	7.73e-13	-60	1	2.91e-14	-60	1	1.252e-13	-60	1	8.875e-11	-60	1	5.17e-10	-60	1	2.27e-12	-60	1	5.65e-12	-60	1	4.85556e-12	-60	1	3.19e-13	-60	1	5.37e-13	-60	1	2.74e-13	-60	1	3.7e-13	-60	1	-1.4e-14	-60	1	3.4e-14	-60	1
-59.4	1	1.23333e-14	-59.4	1	8.9e-14	-59.4	1	1.24e-12	-59.4	1	2.7e-14	-59.4	1	1.072e-13	-59.4	1	1.1225e-10	-59.4	1	7.25e-10	-59.4	1	9.53e-12	-59.4	1	1.105e-11	-59.4	1	8.33333e-12	-59.4	1	4.435e-13	-59.4	1	6.82e-13	-59.4	1	1.12e-13	-59.4	1	4.96e-13	-59.4	1	-1.96e-14	-59.4	1	3.73333e-14	-59.4	1
-58.8	1	1.32333e-14	-58.8	1	1.14e-13	-58.8	1	1.8e-12	-58.8	1	1.97667e-14	-58.8	1	1.46e-13	-58.8	1	1.5825e-10	-58.8	1	9.94e-10	-58.8	1	1.43e-11	-58.8	1	2.005e-11	-58.8	1	1.37222e-11	-58.8	1	6.4e-13	-58.8	1	8.79e-13	-58.8	1	4.55e-14	-58.8	1	6.13e-13	-58.8	1	-1.185e-14	-58.8	1	2.45333e-14	-58.8	1
-58.2	1	8.9e-15	-58.2	1	1.395e-13	-58.2	1	2.85e-12	-58.2	1	2.32e-14	-58.2	1	1.328e-13	-58.2	1	2.0275e-10	-58.2	1	1.34e-09	-58.2	1	4.33e-11	-58.2	1	3.24e-11	-58.2	1	2.22222e-11	-58.2	1	9.15e-13	-58.2	1	1.16e-12	-58.2	1	6.9e-14	-58.2	1	8.45e-13	-58.2	1	-1.585e-14	-58.2	1	2.02333e-14	-58.2	1
-57.6	1	1.05e-14	-57.6	1	1.905e-13	-57.6	1	4.57e-12	-57.6	1	1.49333e-14	-57.6	1	1.988e-13	-57.6	1	2.675e-10	-57.6	1	1.8e-09	-57.6	1	7.27e-11	-57.6	1	6.3e-11	-57.6	1	3.86667e-11	-57.6	1	1.355e-12	-57.6	1	1.55e-12	-57.6	1	9.27e-14	-57.6	1	1.13e-12	-57.6	1	-9.15e-15	-57.6	1	2.48e-14	-57.6	1
-57	1	5.7e-15	-57	1	2.5e-13	-57	1	7.12e-12	-57	1	1.77333e-14	-57	1	2.376e-13	-57	1	3.3e-10	-57	1	2.35e-09	-57	1	1.69e-10	-57	1	1.11e-10	-57	1	9.22222e-11	-57	1	1.985e-12	-57	1	2.13e-12	-57	1	2.34e-13	-57	1	1.41e-12	-57	1	-1.56e-14	-57	1	-1.68e-15	-57	1
-56.4	1	9.93333e-15	-56.4	1	3.49e-13	-56.4	1	1.15e-11	-56.4	1	1.24e-14	-56.4	1	4.4e-13	-56.4	1	4.175e-10	-56.4	1	3.06e-09	-56.4	1	3.24e-10	-56.4	1	1.83e-10	-56.4	1	1.91667e-10	-56.4	1	2.955e-12	-56.4	1	2.88e-12	-56.4	1	6e-14	-56.4	1	1.7e-12	-56.4	1	-4.335e-15	-56.4	1	2.46333e-14	-56.4	1
-55.8	1	4.73333e-15	-55.8	1	4.885e-13	-55.8	1	1.91e-11	-55.8	1	1.42667e-14	-55.8	1	3.876e-13	-55.8	1	5.225e-10	-55.8	1	3.94e-09	-55.8	1	5.84e-10	-55.8	1	2.715e-10	-55.8	1	3.43333e-10	-55.8	1	4.385e-12	-55.8	1	3.92e-12	-55.8	1	6.16e-14	-55.8	1	2e-12	-55.8	1	-1.1e-14	-55.8	1	1.04333e-14	-55.8	1
-55.3	1	9.63333e-15	-55.3	1	6.8e-13	-55.3	1	2.98e-11	-55.2	1	1.03e-14	-55.3	1	5.56e-13	-55.3	1	6.55e-10	-55.3	1	4.77e-09	-55.3	1	1.14e-09	-55.2	1	4.415e-10	-55.2	1	7.61111e-10	-55.2	1	6.65e-12	-55.2	1	5.24e-12	-55.2	1	7.46e-14	-55.2	1	2.27e-12	-55.3	1	-2.245e-15	-55.2	1	-1.81e-15	-55.2	1
-54.7	1	3.26333e-15	-54.7	1	9.75e-13	-54.7	1	4.84e-11	-54.6	1	1.08e-14	-54.7	1	1.028e-12	-54.7	1	8.225e-10	-54.7	1	6.16e-09	-54.7	1	2.08e-09	-54.6	1	6.75e-10	-54.6	1	1.47778e-09	-54.6	1	9.75e-12	-54.6	1	7.22e-12	-54.6	1	9.95e-14	-54.6	1	2.61e-12	-54.7	1	-9.3e-15	-54.6	1	1.67667e-14	-54.6	1
-54.1	1	8.8e-15	-54.1	1	1.385e-12	-54.1	1	7.28e-11	-54	1	9.43333e-15	-54.1	1	1.228e-12	-54.1	1	1.0225e-09	-54.1	1	7.88e-09	-54.1	1	3.42e-09	-54	1	9.95e-10	-54	1	2.52222e-09	-54	1	1.46e-11	-54	1	1.01e-11	-54	1	-3.44e-16	-54	1	3.08e-12	-54.1	1	1.365e-16	-54	1	1.27667e-14	-54	1
-53.5	1	2.11667e-15	-53.5	1	2.03e-12	-53.5	1	1.44e-10	-53.4	1	1.01e-14	-53.5	1	1.272e-12	-53.5	1	1.22e-09	-53.5	1	9.85e-09	-53.5	1	4.92e-09	-53.4	1	1.415e-09	-53.4	1	3.05556e-09	-53.4	1	2.165e-11	-53.4	1	1.42e-11	-53.4	1	-1.74e-15	-53.4	1	3.82e-12	-53.5	1	-6.2e-15	-53.4	1	-2.67667e-15	-53.4	1
-52.9	1	9.1e-15	-52.9	1	3e-12	-52.9	1	2.6e-10	-52.8	1	9.43333e-15	-52.9	1	3.12e-12	-52.9	1	1.475e-09	-52.9	1	1.23e-08	-52.9	1	7.47e-09	-52.8	1	1.955e-09	-52.8	1	5.28333e-09	-52.8	1	3.005e-11	-52.8	1	1.99e-11	-52.8	1	9.66e-15	-52.8	1	5.27e-12	-52.9	1	3.365e-15	-52.8	1	4.4e-15	-52.8	1
-52.3	1	3.22333e-15	-52.3	1	4.55e-12	-52.3	1	4.42e-10	-52.2	1	7.36667e-15	-52.3	1	1.54e-12	-52.3	1	1.8475e-09	-52.3	1	1.51e-08	-52.3	1	1.15e-08	-52.2	1	2.385e-09	-52.2	1	8.33333e-09	-52.2	1	4.845e-11	-52.2	1	2.77e-11	-52.2	1	4.09e-15	-52.2	1	8.56e-12	-52.3	1	-1.32e-15	-52.2	1	7.53333e-15	-52.2	1
-51.7	1	8.46667e-15	-51.7	1	6.6e-12	-51.7	1	6.18e-10	-51.6	1	8.8e-15	-51.7	1	1.812e-12	-51.7	1	2.315e-09	-51.7	1	1.84e-08	-51.7	1	1.64e-08	-51.6	1	3.27e-09	-51.6	1	1.18333e-08	-51.6	1	7.45e-11	-51.6	1	3.91e-11	-51.6	1	4.74e-14	-51.6	1	1.54e-11	-51.7	1	5.15e-15	-51.6	1	4.7e-15	-51.6	1
-51.1	1	4.4e-15	-51.1	1	9.7e-12	-51.1	1	1.07e-09	-51	1	5.4e-15	-51.1	1	3.012e-12	-51.1	1	2.8e-09	-51.1	1	2.23e-08	-51.1	1	2.4e-08	-51	1	4.345e-09	-51	1	1.67778e-08	-51	1	1.12e-10	-51	1	5.36e-11	-51	1	6.54e-14	-51	1	2.88e-11	-51.1	1	-3.77e-15	-51	1	5.2e-15	-51	1
-50.5	1	9.33333e-15	-50.5	1	1.48e-11	-50.5	1	1.69e-09	-50.4	1	9.16667e-15	-50.5	1	3.46e-12	-50.5	1	3.5e-09	-50.5	1	2.68e-08	-50.5	1	3.35e-08	-50.4	1	5.65e-09	-50.4	1	2.28889e-08	-50.4	1	1.67e-10	-50.4	1	8.15e-11	-50.4	1	7.99e-14	-50.4	1	4.63e-11	-50.5	1	6.05e-15	-50.4	1	4.96667e-15	-50.4	1
-49.9	1	6.1e-15	-49.9	1	2.165e-11	-49.9	1	2.62e-09	-49.8	1	3.43333e-15	-49.9	1	5.68e-12	-49.9	1	4.4e-09	-49.9	1	3.22e-08	-49.9	1	4.42e-08	-49.8	1	7.25e-09	-49.8	1	2.58889e-08	-49.8	1	2.44e-10	-49.8	1	1.22e-10	-49.8	1	-1.44e-13	-49.8	1	1.21e-10	-49.9	1	-1.3e-15	-49.8	1	2.82667e-14	-49.8	1
-49.3	1	1.27333e-14	-49.3	1	3.035e-11	-49.3	1	3.76e-09	-49.2	1	8.13333e-15	-49.3	1	7.44e-12	-49.3	1	5.275e-09	-49.3	1	3.8e-08	-49.3	1	5.28e-08	-49.2	1	9.1e-09	-49.2	1	3.45556e-08	-49.2	1	3.29e-10	-49.2	1	1.81e-10	-49.2	1	1.23e-13	-49.2	1	2.46e-10	-49.3	1	5.5e-15	-49.2	1	4.93333e-14	-49.2	1
-48.7	1	1.44e-14	-48.7	1	4.88e-11	-48.7	1	4.65e-09	-48.6	1	3.02333e-15	-48.7	1	1.068e-11	-48.7	1	6.175e-09	-48.7	1	4.49e-08	-48.7	1	7.07e-08	-48.6	1	1.135e-08	-48.6	1	4.55e-08	-48.6	1	4.94e-10	-48.6	1	2.6e-10	-48.6	1	3.9e-13	-48.6	1	4.31e-10	-48.7	1	-7.7e-16	-48.6	1	1.09e-13	-48.6	1
-48.1	1	3.66667e-14	-48.1	1	7.4e-11	-48.1	1	6.66e-09	-48	1	7.3e-15	-48.1	1	1.504e-11	-48.1	1	7.525e-09	-48.1	1	5.04e-08	-48.1	1	8.81e-08	-48	1	1.395e-08	-48	1	5.77778e-08	-48	1	7e-10	-48	1	3.67e-10	-48	1	1.1e-12	-48	1	6.3e-10	-48.1	1	6.9e-15	-48	1	2.41333e-13	-48	1
-47.5	1	6.83333e-14	-47.5	1	1.14e-10	-47.5	1	9.32e-09	-47.4	1	1.87667e-15	-47.5	1	2.264e-11	-47.5	1	8.825e-09	-47.5	1	5.94e-08	-47.5	1	1.11e-07	-47.4	1	1.69e-08	-47.4	1	7.16667e-08	-47.4	1	9.7e-10	-47.4	1	5.09e-10	-47.4	1	2.32e-12	-47.4	1	1.16e-09	-47.5	1	4.19e-15	-47.4	1	4.96667e-13	-47.4	1
-46.9	1	2.02333e-13	-46.9	1	1.68e-10	-46.9	1	1.26e-08	-46.8	1	8.23333e-15	-46.9	1	2.56e-11	-46.9	1	1.0725e-08	-46.9	1	6.91e-08	-46.9	1	1.38e-07	-46.8	1	2.02e-08	-46.8	1	8.77778e-08	-46.8	1	1.335e-09	-46.8	1	7.31e-10	-46.8	1	4.86e-12	-46.8	1	1.97e-09	-46.9	1	1.005e-14	-46.8	1	1.12667e-12	-46.8	1
-46.3	1	5.93333e-13	-46.3	1	2.44e-10	-46.3	1	1.69e-08	-46.2	1	3.76667e-15	-46.3	1	4.56e-11	-46.3	1	1.1875e-08	-46.3	1	8.01e-08	-46.3	1	1.66e-07	-46.2	1	2.405e-08	-46.2	1	1.06667e-07	-46.2	1	1.825e-09	-46.2	1	1.04e-09	-46.2	1	9.63e-12	-46.2	1	2.99e-09	-46.3	1	5.55e-15	-46.2	1	2.58e-12	-46.2	1
-45.7	1	1.54333e-12	-45.7	1	3.32e-10	-45.7	1	2.18e-08	-45.6	1	8.13333e-15	-45.7	1	6.56e-11	-45.7	1	1.43e-08	-45.7	1	9.23e-08	-45.7	1	2.04e-07	-45.6	1	2.7e-08	-45.6	1	1.27778e-07	-45.6	1	2.425e-09	-45.6	1	1.45e-09	-45.6	1	1.86e-11	-45.6	1	4.31e-09	-45.7	1	4.39e-15	-45.6	1	4.8e-12	-45.6	1
-45.2	1	4.5e-12	-45.2	1	4.945e-10	-45.2	1	2.81e-08	-45	1	4.73333e-15	-45.2	1	1.036e-10	-45.2	1	1.675e-08	-45.2	1	1.06e-07	-45.2	1	2.45e-07	-45	1	3.21e-08	-45	1	1.50556e-07	-45	1	2.98e-09	-45	1	1.96e-09	-45	1	3.37e-11	-45	1	4.82e-09	-45.2	1	9.35e-15	-45	1	8.76667e-12	-45	1
-44.6	1	1.36e-11	-44.6	1	7.3e-10	-44.6	1	3.55e-08	-44.4	1	9.76667e-15	-44.6	1	1.548e-10	-44.6	1	1.97e-08	-44.6	1	1.21e-07	-44.6	1	2.87e-07	-44.4	1	3.77e-08	-44.4	1	1.76111e-07	-44.4	1	3.965e-09	-44.4	1	2.63e-09	-44.4	1	5.16e-11	-44.4	1	7.18e-09	-44.6	1	5.25e-15	-44.4	1	1.51333e-11	-44.4	1
-44	1	3.9e-11	-44	1	1.045e-09	-44	1	4.46e-08	-43.8	1	7.06667e-15	-44	1	2.34e-10	-44	1	2.3e-08	-44	1	1.38e-07	-44	1	3.33e-07	-43.8	1	4.395e-08	-43.8	1	2.02222e-07	-43.8	1	5.2e-09	-43.8	1	3.5e-09	-43.8	1	1.01e-10	-43.8	1	1.03e-08	-44	1	1.01e-14	-43.8	1	2.12333e-11	-43.8	1
-43.4	1	1.20667e-10	-43.4	1	1.435e-09	-43.4	1	4.93e-08	-43.2	1	1.65333e-14	-43.4	1	2.88e-10	-43.4	1	2.7e-08	-43.4	1	1.56e-07	-43.4	1	3.84e-07	-43.2	1	5.1e-08	-43.2	1	2.32778e-07	-43.2	1	6.7e-09	-43.2	1	4.62e-09	-43.2	1	1.78e-10	-43.2	1	1.41e-08	-43.4	1	5.45e-15	-43.2	1	4.26667e-11	-43.2	1
-42.8	1	2.71e-10	-42.8	1	1.985e-09	-42.8	1	6.16e-08	-42.6	1	2.02e-14	-42.8	1	3.9e-10	-42.8	1	3.125e-08	-42.8	1	1.76e-07	-42.8	1	4.4e-07	-42.6	1	5.85e-08	-42.6	1	2.65e-07	-42.6	1	8.55e-09	-42.6	1	5.55e-09	-42.6	1	2.83e-10	-42.6	1	1.83e-08	-42.8	1	1.195e-14	-42.6	1	7.6e-11	-42.6	1
-42.2	1	6.16667e-10	-42.2	1	2.46e-09	-42.2	1	7.59e-08	-42	1	3.9e-14	-42.2	1	5.68e-10	-42.2	1	3.625e-08	-42.2	1	1.98e-07	-42.2	1	4.83e-07	-42	1	6.7e-08	-42	1	2.85556e-07	-42	1	1.07e-08	-42	1	7.28e-09	-42	1	4.47e-10	-42	1	2.36e-08	-42.2	1	5.05e-15	-42	1	1.24667e-10	-42	1
-41.6	1	1.18e-09	-41.6	1	3.43e-09	-41.6	1	9.26e-08	-41.4	1	6.76667e-14	-41.6	1	9.2e-10	-41.6	1	4.2e-08	-41.6	1	2.21e-07	-41.6	1	5.54e-07	-41.4	1	7.65e-08	-41.4	1	3.21111e-07	-41.4	1	1.345e-08	-41.4	1	9.51e-09	-41.4	1	6.14e-10	-41.4	1	2.95e-08	-41.6	1	1.44e-14	-41.4	1	1.79333e-10	-41.4	1
-41	1	1.70333e-09	-41	1	4.6e-09	-41	1	1.09e-07	-40.8	1	1.07667e-13	-41	1	1.272e-09	-41	1	4.875e-08	-41	1	2.47e-07	-41	1	6.24e-07	-40.8	1	8.65e-08	-40.8	1	3.65e-07	-40.8	1	1.65e-08	-40.8	1	1.24e-08	-40.8	1	9.78e-10	-40.8	1	3.67e-08	-41	1	5.65e-15	-40.8	1	2.86e-10	-40.8	1
-40.4	1	2.83667e-09	-40.4	1	6.2e-09	-40.4	1	1.3e-07	-40.2	1	1.52e-13	-40.4	1	1.752e-09	-40.4	1	5.575e-08	-40.4	1	2.74e-07	-40.4	1	6.93e-07	-40.2	1	9.75e-08	-40.2	1	4.14444e-07	-40.2	1	2.025e-08	-40.2	1	1.57e-08	-40.2	1	1.48e-09	-40.2	1	4.53e-08	-40.4	1	1.395e-14	-40.2	1	4.36667e-10	-40.2	1
-39.8	1	4.36667e-09	-39.8	1	8.1e-09	-39.8	1	1.52e-07	-39.6	1	2.71667e-13	-39.8	1	2.764e-09	-39.8	1	6.325e-08	-39.8	1	3.04e-07	-39.8	1	7.73e-07	-39.6	1	1.095e-07	-39.6	1	4.66667e-07	-39.6	1	2.455e-08	-39.6	1	1.96e-08	-39.6	1	2.1e-09	-39.6	1	4.67e-08	-39.8	1	6.05e-15	-39.6	1	6.36667e-10	-39.6	1
-39.2	1	6.5e-09	-39.2	1	1.06e-08	-39.2	1	1.77e-07	-39	1	4.46667e-13	-39.2	1	3.104e-09	-39.2	1	7.225e-08	-39.2	1	3.36e-07	-39.2	1	8.54e-07	-39	1	1.225e-07	-39	1	5.22778e-07	-39	1	2.8e-08	-39	1	2.47e-08	-39	1	2.93e-09	-39	1	5.71e-08	-39.2	1	1.725e-14	-39	1	8.73333e-10	-39	1
-38.6	1	9.46667e-09	-38.6	1	1.36e-08	-38.6	1	2.06e-07	-38.4	1	7.7e-13	-38.6	1	3.96e-09	-38.6	1	8.15e-08	-38.6	1	3.71e-07	-38.6	1	9.36e-07	-38.4	1	1.365e-07	-38.4	1	5.83333e-07	-38.4	1	3.4e-08	-38.4	1	3.03e-08	-38.4	1	3.96e-09	-38.4	1	6.85e-08	-38.6	1	1.765e-14	-38.4	1	1.21e-09	-38.4	1
-38	1	1.30667e-08	-38	1	1.705e-08	-38	1	2.37e-07	-37.8	1	1.29667e-12	-38	1	5.32e-09	-38	1	9.275e-08	-38	1	4.07e-07	-38	1	1.02e-06	-37.8	1	1.515e-07	-37.8	1	6.44444e-07	-37.8	1	4.06e-08	-37.8	1	3.73e-08	-37.8	1	4.65e-09	-37.8	1	8.07e-08	-38	1	4.055e-14	-37.8	1	1.61e-09	-37.8	1
-37.4	1	1.57e-08	-37.4	1	2.17e-08	-37.4	1	2.71e-07	-37.2	1	2.43333e-12	-37.4	1	6.68e-09	-37.4	1	1.0625e-07	-37.4	1	4.46e-07	-37.4	1	1.11e-06	-37.2	1	1.68e-07	-37.2	1	7.05556e-07	-37.2	1	4.86e-08	-37.2	1	4.53e-08	-37.2	1	6.38e-09	-37.2	1	9.47e-08	-37.4	1	7.15e-14	-37.2	1	1.86e-09	-37.2	1
-36.8	1	2.12e-08	-36.8	1	2.54e-08	-36.8	1	3.1e-07	-36.6	1	4.73333e-12	-36.8	1	9e-09	-36.8	1	1.21e-07	-36.8	1	4.87e-07	-36.8	1	1.21e-06	-36.6	1	1.86e-07	-36.6	1	7.72222e-07	-36.6	1	5.7e-08	-36.6	1	5.15e-08	-36.6	1	8.43e-09	-36.6	1	1.1e-07	-36.8	1	1.095e-13	-36.6	1	2.49333e-09	-36.6	1
-36.2	1	2.81333e-08	-36.2	1	3.19e-08	-36.2	1	3.5e-07	-36	1	8.16667e-12	-36.2	1	1.192e-08	-36.2	1	1.3175e-07	-36.2	1	5.22e-07	-36.2	1	1.32e-06	-36	1	2.045e-07	-36	1	8.5e-07	-36	1	6.7e-08	-36	1	6.22e-08	-36	1	1.09e-08	-36	1	1.27e-07	-36.2	1	1.845e-13	-36	1	3.32333e-09	-36	1
-35.6	1	3.66667e-08	-35.6	1	3.95e-08	-35.6	1	3.98e-07	-35.4	1	1.46667e-11	-35.6	1	1.492e-08	-35.6	1	1.4975e-07	-35.6	1	5.7e-07	-35.6	1	1.42e-06	-35.4	1	2.245e-07	-35.4	1	9.33333e-07	-35.4	1	7.75e-08	-35.4	1	7.49e-08	-35.4	1	1.41e-08	-35.4	1	1.46e-07	-35.6	1	4.535e-13	-35.4	1	4.3e-09	-35.4	1
-35.1	1	4.7e-08	-35.1	1	4.835e-08	-35.1	1	4.47e-07	-34.8	1	2.15e-11	-35.1	1	1.912e-08	-35.1	1	1.7075e-07	-35.1	1	6.21e-07	-35.1	1	1.53e-06	-34.8	1	2.46e-07	-34.8	1	1.01667e-06	-34.8	1	9e-08	-34.8	1	8.89e-08	-34.8	1	1.76e-08	-34.8	1	1.66e-07	-35.1	1	8.15e-13	-34.8	1	5.43333e-09	-34.8	1
-34.5	1	5.86667e-08	-34.5	1	5.9e-08	-34.5	1	4.77e-07	-34.2	1	4.96667e-11	-34.5	1	2.764e-08	-34.5	1	1.92e-07	-34.5	1	6.74e-07	-34.5	1	1.64e-06	-34.2	1	2.62e-07	-34.2	1	1.10556e-06	-34.2	1	1.04e-07	-34.2	1	1.05e-07	-34.2	1	2.21e-08	-34.2	1	1.88e-07	-34.5	1	1.64e-12	-34.2	1	6.8e-09	-34.2	1
-33.9	1	7.23333e-08	-33.9	1	7.15e-08	-33.9	1	5.36e-07	-33.6	1	9.66667e-11	-33.9	1	2.952e-08	-33.9	1	2.14e-07	-33.9	1	7.29e-07	-33.9	1	1.75e-06	-33.6	1	2.87e-07	-33.6	1	1.18889e-06	-33.6	1	1.19e-07	-33.6	1	1.24e-07	-33.6	1	2.73e-08	-33.6	1	2.11e-07	-33.9	1	3.395e-12	-33.6	1	8.33333e-09	-33.6	1
-33.3	1	8.86667e-08	-33.3	1	8.55e-08	-33.3	1	6.02e-07	-33	1	1.45333e-10	-33.3	1	3.46e-08	-33.3	1	2.3975e-07	-33.3	1	7.88e-07	-33.3	1	1.86e-06	-33	1	3.135e-07	-33	1	1.27778e-06	-33	1	1.35e-07	-33	1	1.45e-07	-33	1	3.32e-08	-33	1	2.36e-07	-33.3	1	6.3e-12	-33	1	1.01333e-08	-33	1
-32.7	1	1.07e-07	-32.7	1	1.015e-07	-32.7	1	6.67e-07	-32.4	1	2.95667e-10	-32.7	1	4.36e-08	-32.7	1	2.675e-07	-32.7	1	8.49e-07	-32.7	1	1.98e-06	-32.4	1	3.41e-07	-32.4	1	1.39444e-06	-32.4	1	1.535e-07	-32.4	1	1.68e-07	-32.4	1	4.02e-08	-32.4	1	2.63e-07	-32.7	1	1.175e-11	-32.4	1	1.23333e-08	-32.4	1
-32.1	1	1.27667e-07	-32.1	1	1.19e-07	-32.1	1	7.35e-07	-31.8	1	5.3e-10	-32.1	1	5.4e-08	-32.1	1	3e-07	-32.1	1	9.14e-07	-32.1	1	2.1e-06	-31.8	1	3.71e-07	-31.8	1	1.48889e-06	-31.8	1	1.74e-07	-31.8	1	1.93e-07	-31.8	1	4.82e-08	-31.8	1	2.92e-07	-32.1	1	2.105e-11	-31.8	1	1.49333e-08	-31.8	1
-31.5	1	1.52333e-07	-31.5	1	1.41e-07	-31.5	1	8.18e-07	-31.2	1	8.5e-10	-31.5	1	6.44e-08	-31.5	1	3.325e-07	-31.5	1	9.81e-07	-31.5	1	2.23e-06	-31.2	1	4.02e-07	-31.2	1	1.59444e-06	-31.2	1	1.96e-07	-31.2	1	2.23e-07	-31.2	1	5.25e-08	-31.2	1	3.23e-07	-31.5	1	3.35e-11	-31.2	1	1.58667e-08	-31.2	1
-30.9	1	1.67333e-07	-30.9	1	1.65e-07	-30.9	1	9.04e-07	-30.6	1	1.35333e-09	-30.9	1	7.8e-08	-30.9	1	3.7e-07	-30.9	1	1.05e-06	-30.9	1	2.35e-06	-30.6	1	4.35e-07	-30.6	1	1.71111e-06	-30.6	1	2.195e-07	-30.6	1	2.55e-07	-30.6	1	6.24e-08	-30.6	1	3.57e-07	-30.9	1	7.6e-11	-30.6	1	1.91e-08	-30.6	1
-30.3	1	1.97e-07	-30.3	1	1.905e-07	-30.3	1	9.89e-07	-30	1	1.60667e-09	-30.3	1	9.24e-08	-30.3	1	4.125e-07	-30.3	1	1.13e-06	-30.3	1	2.48e-06	-30	1	4.705e-07	-30	1	1.82222e-06	-30	1	2.46e-07	-30	1	2.91e-07	-30	1	7.41e-08	-30	1	3.93e-07	-30.3	1	1.37e-10	-30	1	2.32e-08	-30	1
-29.7	1	2.32e-07	-29.7	1	2.2e-07	-29.7	1	1.08e-06	-29.4	1	2.71333e-09	-29.7	1	1.06e-07	-29.7	1	4.525e-07	-29.7	1	1.2e-06	-29.7	1	2.61e-06	-29.4	1	5.1e-07	-29.4	1	1.94444e-06	-29.4	1	2.67e-07	-29.4	1	3.31e-07	-29.4	1	8.79e-08	-29.4	1	4.3e-07	-29.7	1	2.145e-10	-29.4	1	2.8e-08	-29.4	1
-29.1	1	2.70667e-07	-29.1	1	2.435e-07	-29.1	1	1.19e-06	-28.8	1	4.1e-09	-29.1	1	1.264e-07	-29.1	1	4.95e-07	-29.1	1	1.28e-06	-29.1	1	2.74e-06	-28.8	1	5.45e-07	-28.8	1	2.06111e-06	-28.8	1	2.975e-07	-28.8	1	3.74e-07	-28.8	1	1.03e-07	-28.8	1	4.69e-07	-29.1	1	3.065e-10	-28.8	1	3.28333e-08	-28.8	1
-28.5	1	3.13e-07	-28.5	1	2.795e-07	-28.5	1	1.29e-06	-28.2	1	5.76667e-09	-28.5	1	1.468e-07	-28.5	1	5.475e-07	-28.5	1	1.37e-06	-28.5	1	2.87e-06	-28.2	1	5.9e-07	-28.2	1	2.18889e-06	-28.2	1	3.315e-07	-28.2	1	4.22e-07	-28.2	1	1.19e-07	-28.2	1	4.79e-07	-28.5	1	5.45e-10	-28.2	1	3.83333e-08	-28.2	1
-27.9	1	3.56667e-07	-27.9	1	3.205e-07	-27.9	1	1.4e-06	-27.6	1	8.26667e-09	-27.9	1	1.724e-07	-27.9	1	6.05e-07	-27.9	1	1.45e-06	-27.9	1	3e-06	-27.6	1	6.3e-07	-27.6	1	2.33889e-06	-27.6	1	3.665e-07	-27.6	1	4.73e-07	-27.6	1	1.37e-07	-27.6	1	5.27e-07	-27.9	1	8.85e-10	-27.6	1	4.46667e-08	-27.6	1
-27.3	1	4.06667e-07	-27.3	1	3.655e-07	-27.3	1	1.52e-06	-27	1	1.06667e-08	-27.3	1	1.956e-07	-27.3	1	6.525e-07	-27.3	1	1.54e-06	-27.3	1	3.15e-06	-27	1	6.75e-07	-27	1	2.47222e-06	-27	1	4.045e-07	-27	1	5.15e-07	-27	1	1.59e-07	-27	1	5.76e-07	-27.3	1	1.34e-09	-27	1	5.13333e-08	-27	1
-26.7	1	4.63333e-07	-26.7	1	4.15e-07	-26.7	1	1.65e-06	-26.4	1	1.38333e-08	-26.7	1	2.388e-07	-26.7	1	7.175e-07	-26.7	1	1.64e-06	-26.7	1	3.29e-06	-26.4	1	7.25e-07	-26.4	1	2.61111e-06	-26.4	1	4.45e-07	-26.4	1	5.76e-07	-26.4	1	1.84e-07	-26.4	1	6.26e-07	-26.7	1	1.905e-09	-26.4	1	5.93333e-08	-26.4	1
-26.1	1	5.23333e-07	-26.1	1	4.68e-07	-26.1	1	1.78e-06	-25.8	1	1.45667e-08	-26.1	1	2.532e-07	-26.1	1	7.85e-07	-26.1	1	1.73e-06	-26.1	1	3.43e-06	-25.8	1	7.7e-07	-25.8	1	2.76111e-06	-25.8	1	4.875e-07	-25.8	1	6.4e-07	-25.8	1	2.09e-07	-25.8	1	6.8e-07	-26.1	1	2.225e-09	-25.8	1	6.76667e-08	-25.8	1
-25.5	1	5.86667e-07	-25.5	1	5.25e-07	-25.5	1	1.92e-06	-25.2	1	1.88e-08	-25.5	1	2.928e-07	-25.5	1	8.575e-07	-25.5	1	1.84e-06	-25.5	1	3.58e-06	-25.2	1	8.2e-07	-25.2	1	2.86667e-06	-25.2	1	5.35e-07	-25.2	1	7.11e-07	-25.2	1	2.38e-07	-25.2	1	7.35e-07	-25.5	1	3.295e-09	-25.2	1	7.73333e-08	-25.2	1
-25	1	6.53333e-07	-25	1	5.9e-07	-25	1	2.07e-06	-24.6	1	2.37e-08	-25	1	3.348e-07	-25	1	9.275e-07	-25	1	1.94e-06	-25	1	3.75e-06	-24.6	1	8.75e-07	-24.6	1	3.02778e-06	-24.6	1	5.85e-07	-24.6	1	7.9e-07	-24.6	1	2.7e-07	-24.6	1	7.91e-07	-25	1	4.51e-09	-24.6	1	8.73333e-08	-24.6	1
-24.4	1	7.3e-07	-24.4	1	6.6e-07	-24.4	1	2.22e-06	-24	1	2.99e-08	-24.4	1	3.708e-07	-24.4	1	1.0025e-06	-24.4	1	2.05e-06	-24.4	1	3.9e-06	-24	1	9.3e-07	-24	1	3.19444e-06	-24	1	6.35e-07	-24	1	8.72e-07	-24	1	3.04e-07	-24	1	8.49e-07	-24.4	1	6.15e-09	-24	1	9.86667e-08	-24	1
-23.8	1	8.1e-07	-23.8	1	7.3e-07	-23.8	1	2.36e-06	-23.4	1	3.63333e-08	-23.8	1	4.12e-07	-23.8	1	1.0925e-06	-23.8	1	2.16e-06	-23.8	1	4.05e-06	-23.4	1	9.9e-07	-23.4	1	3.38333e-06	-23.4	1	6.85e-07	-23.4	1	9.64e-07	-23.4	1	3.42e-07	-23.4	1	9.13e-07	-23.8	1	7.75e-09	-23.4	1	1.11e-07	-23.4	1
-23.2	1	8.93333e-07	-23.2	1	8.1e-07	-23.2	1	2.52e-06	-22.8	1	4.36667e-08	-23.2	1	4.52e-07	-23.2	1	1.18e-06	-23.2	1	2.27e-06	-23.2	1	4.18e-06	-22.8	1	1.05e-06	-22.8	1	3.56111e-06	-22.8	1	7.45e-07	-22.8	1	1.06e-06	-22.8	1	3.84e-07	-22.8	1	9.8e-07	-23.2	1	1.02e-08	-22.8	1	1.24e-07	-22.8	1
-22.6	1	9.86667e-07	-22.6	1	8.95e-07	-22.6	1	2.69e-06	-22.2	1	5.36667e-08	-22.6	1	5.08e-07	-22.6	1	1.26e-06	-22.6	1	2.39e-06	-22.6	1	4.35e-06	-22.2	1	1.11e-06	-22.2	1	3.73889e-06	-22.2	1	8.05e-07	-22.2	1	1.16e-06	-22.2	1	4.3e-07	-22.2	1	1.05e-06	-22.6	1	1.325e-08	-22.2	1	1.38333e-07	-22.2	1
-22	1	1.08333e-06	-22	1	9.85e-07	-22	1	2.86e-06	-21.6	1	6.3e-08	-22	1	5.52e-07	-22	1	1.3675e-06	-22	1	2.51e-06	-22	1	4.49e-06	-21.6	1	1.175e-06	-21.6	1	3.91667e-06	-21.6	1	8.7e-07	-21.6	1	1.26e-06	-21.6	1	4.78e-07	-21.6	1	1.12e-06	-22	1	1.715e-08	-21.6	1	1.54e-07	-21.6	1
-21.4	1	1.19e-06	-21.4	1	1.085e-06	-21.4	1	3.05e-06	-21	1	7.6e-08	-21.4	1	6.2e-07	-21.4	1	1.465e-06	-21.4	1	2.63e-06	-21.4	1	4.66e-06	-21	1	1.24e-06	-21	1	4.1e-06	-21	1	9.4e-07	-21	1	1.37e-06	-21	1	5e-07	-21	1	1.2e-06	-21.4	1	2.095e-08	-21	1	1.59333e-07	-21	1
-20.8	1	1.3e-06	-20.8	1	1.19e-06	-20.8	1	3.24e-06	-20.4	1	8.96667e-08	-20.8	1	6.96e-07	-20.8	1	1.5725e-06	-20.8	1	2.76e-06	-20.8	1	4.83e-06	-20.4	1	1.31e-06	-20.4	1	4.31111e-06	-20.4	1	1.01e-06	-20.4	1	1.49e-06	-20.4	1	5.61e-07	-20.4	1	1.28e-06	-20.8	1	2.325e-08	-20.4	1	1.79667e-07	-20.4	1
-20.2	1	1.41667e-06	-20.2	1	1.305e-06	-20.2	1	3.43e-06	-19.8	1	1.03667e-07	-20.2	1	7.6e-07	-20.2	1	1.6775e-06	-20.2	1	2.89e-06	-20.2	1	4.93e-06	-19.8	1	1.38e-06	-19.8	1	4.49444e-06	-19.8	1	1.085e-06	-19.8	1	1.61e-06	-19.8	1	6.29e-07	-19.8	1	1.36e-06	-20.2	1	2.95e-08	-19.8	1	2e-07	-19.8	1
-19.6	1	1.53667e-06	-19.6	1	1.42e-06	-19.6	1	3.63e-06	-19.2	1	1.19667e-07	-19.6	1	8.24e-07	-19.6	1	1.7925e-06	-19.6	1	3.03e-06	-19.6	1	5.1e-06	-19.2	1	1.455e-06	-19.2	1	4.70556e-06	-19.2	1	1.165e-06	-19.2	1	1.74e-06	-19.2	1	6.96e-07	-19.2	1	1.43e-06	-19.6	1	3.64e-08	-19.2	1	2.19333e-07	-19.2	1
-19	1	1.66333e-06	-19	1	1.545e-06	-19	1	3.85e-06	-18.6	1	1.36667e-07	-19	1	9.12e-07	-19	1	1.9125e-06	-19	1	3.17e-06	-19	1	5.28e-06	-18.6	1	1.53e-06	-18.6	1	4.91667e-06	-18.6	1	1.245e-06	-18.6	1	1.89e-06	-18.6	1	7.64e-07	-18.6	1	1.52e-06	-19	1	4.44e-08	-18.6	1	2.42667e-07	-18.6	1
-18.4	1	1.75e-06	-18.4	1	1.68e-06	-18.4	1	4.07e-06	-18	1	1.57667e-07	-18.4	1	1.008e-06	-18.4	1	2.0325e-06	-18.4	1	3.31e-06	-18.4	1	5.43e-06	-18	1	1.61e-06	-18	1	5.13889e-06	-18	1	1.33e-06	-18	1	2.03e-06	-18	1	8.42e-07	-18	1	1.6e-06	-18.4	1	5.4e-08	-18	1	2.68333e-07	-18	1
-17.8	1	1.89333e-06	-17.8	1	1.82e-06	-17.8	1	4.3e-06	-17.4	1	1.69e-07	-17.8	1	1.104e-06	-17.8	1	2.17e-06	-17.8	1	3.46e-06	-17.8	1	5.59e-06	-17.4	1	1.69e-06	-17.4	1	5.37222e-06	-17.4	1	1.415e-06	-17.4	1	2.19e-06	-17.4	1	9.23e-07	-17.4	1	1.7e-06	-17.8	1	6.45e-08	-17.4	1	2.94e-07	-17.4	1
-17.2	1	2.04667e-06	-17.2	1	1.965e-06	-17.2	1	4.51e-06	-16.8	1	1.95333e-07	-17.2	1	1.2e-06	-17.2	1	2.3e-06	-17.2	1	3.61e-06	-17.2	1	5.78e-06	-16.8	1	1.775e-06	-16.8	1	5.55556e-06	-16.8	1	1.505e-06	-16.8	1	2.34e-06	-16.8	1	1.01e-06	-16.8	1	1.8e-06	-17.2	1	7.65e-08	-16.8	1	3.22333e-07	-16.8	1
-16.6	1	2.19333e-06	-16.6	1	2.125e-06	-16.6	1	4.76e-06	-16.2	1	2.22667e-07	-16.6	1	1.284e-06	-16.6	1	2.4625e-06	-16.6	1	3.76e-06	-16.6	1	6e-06	-16.2	1	1.86e-06	-16.2	1	5.77778e-06	-16.2	1	1.6e-06	-16.2	1	2.51e-06	-16.2	1	1.11e-06	-16.2	1	1.9e-06	-16.6	1	9.1e-08	-16.2	1	3.53333e-07	-16.2	1
-16	1	2.35333e-06	-16	1	2.29e-06	-16	1	4.98e-06	-15.6	1	2.51667e-07	-16	1	1.38e-06	-16	1	2.6e-06	-16	1	3.92e-06	-16	1	6.17e-06	-15.6	1	1.945e-06	-15.6	1	6.05556e-06	-15.6	1	1.705e-06	-15.6	1	2.69e-06	-15.6	1	1.21e-06	-15.6	1	2e-06	-16	1	1.07e-07	-15.6	1	3.86667e-07	-15.6	1
-15.4	1	2.52667e-06	-15.4	1	2.46e-06	-15.4	1	5.16e-06	-15	1	2.81667e-07	-15.4	1	1.468e-06	-15.4	1	2.775e-06	-15.4	1	4.08e-06	-15.4	1	6.35e-06	-15	1	2.035e-06	-15	1	6.27778e-06	-15	1	1.805e-06	-15	1	2.87e-06	-15	1	1.31e-06	-15	1	2.1e-06	-15.4	1	1.245e-07	-15	1	4.23333e-07	-15	1
-14.9	1	2.69667e-06	-14.9	1	2.605e-06	-14.9	1	5.43e-06	-14.4	1	3.14e-07	-14.9	1	1.552e-06	-14.9	1	2.925e-06	-14.9	1	4.25e-06	-14.9	1	6.54e-06	-14.4	1	2.13e-06	-14.4	1	6.55556e-06	-14.4	1	1.915e-06	-14.4	1	3.06e-06	-14.4	1	1.43e-06	-14.4	1	2.21e-06	-14.9	1	1.455e-07	-14.4	1	4.56667e-07	-14.4	1
-14.3	1	2.88e-06	-14.3	1	2.805e-06	-14.3	1	5.69e-06	-13.8	1	3.5e-07	-14.3	1	1.672e-06	-14.3	1	3.1e-06	-14.3	1	4.42e-06	-14.3	1	6.72e-06	-13.8	1	2.225e-06	-13.8	1	6.83333e-06	-13.8	1	2.03e-06	-13.8	1	3.27e-06	-13.8	1	1.55e-06	-13.8	1	2.32e-06	-14.3	1	1.67e-07	-13.8	1	4.93333e-07	-13.8	1
-13.7	1	3.06e-06	-13.7	1	3e-06	-13.7	1	5.94e-06	-13.2	1	3.9e-07	-13.7	1	1.76e-06	-13.7	1	3.275e-06	-13.7	1	4.59e-06	-13.7	1	6.89e-06	-13.2	1	2.32e-06	-13.2	1	7.05556e-06	-13.2	1	2.145e-06	-13.2	1	3.47e-06	-13.2	1	1.68e-06	-13.2	1	2.43e-06	-13.7	1	1.93e-07	-13.2	1	5.36667e-07	-13.2	1
-13.1	1	3.25e-06	-13.1	1	3.205e-06	-13.1	1	6.24e-06	-12.6	1	4.26667e-07	-13.1	1	1.928e-06	-13.1	1	3.425e-06	-13.1	1	4.77e-06	-13.1	1	7.09e-06	-12.6	1	2.42e-06	-12.6	1	7.33333e-06	-12.6	1	2.26e-06	-12.6	1	3.69e-06	-12.6	1	1.81e-06	-12.6	1	2.55e-06	-13.1	1	2.22e-07	-12.6	1	5.83333e-07	-12.6	1
-12.5	1	3.46667e-06	-12.5	1	3.425e-06	-12.5	1	6.52e-06	-12	1	4.73333e-07	-12.5	1	2.148e-06	-12.5	1	3.6e-06	-12.5	1	4.95e-06	-12.5	1	7.25e-06	-12	1	2.5e-06	-12	1	7.61111e-06	-12	1	2.385e-06	-12	1	3.91e-06	-12	1	1.95e-06	-12	1	2.67e-06	-12.5	1	2.5e-07	-12	1	6.26667e-07	-12	1
-11.9	1	3.66667e-06	-11.9	1	3.645e-06	-11.9	1	6.82e-06	-11.4	1	5.2e-07	-11.9	1	2.244e-06	-11.9	1	3.775e-06	-11.9	1	5.1e-06	-11.9	1	7.49e-06	-11.4	1	2.605e-06	-11.4	1	7.83333e-06	-11.4	1	2.49e-06	-11.4	1	4.14e-06	-11.4	1	2.1e-06	-11.4	1	2.79e-06	-11.9	1	2.625e-07	-11.4	1	6.73333e-07	-11.4	1
-11.3	1	3.86667e-06	-11.3	1	3.875e-06	-11.3	1	7.1e-06	-10.8	1	5.73333e-07	-11.3	1	2.38e-06	-11.3	1	3.95e-06	-11.3	1	5.29e-06	-11.3	1	7.63e-06	-10.8	1	2.715e-06	-10.8	1	8.11111e-06	-10.8	1	2.62e-06	-10.8	1	4.38e-06	-10.8	1	2.25e-06	-10.8	1	2.92e-06	-11.3	1	2.935e-07	-10.8	1	7.23333e-07	-10.8	1
-10.7	1	4.1e-06	-10.7	1	4.11e-06	-10.7	1	7.38e-06	-10.2	1	6.26667e-07	-10.7	1	2.56e-06	-10.7	1	4.15e-06	-10.7	1	5.48e-06	-10.7	1	7.84e-06	-10.2	1	2.825e-06	-10.2	1	8.38889e-06	-10.2	1	2.76e-06	-10.2	1	4.63e-06	-10.2	1	2.41e-06	-10.2	1	3.05e-06	-10.7	1	3.355e-07	-10.2	1	7.76667e-07	-10.2	1
-10.1	1	4.3e-06	-10.1	1	4.365e-06	-10.1	1	7.69e-06	-9.6	1	6.83333e-07	-10.1	1	2.732e-06	-10.1	1	4.35e-06	-10.1	1	5.68e-06	-10.1	1	8.03e-06	-9.6	1	2.935e-06	-9.6	1	8.66667e-06	-9.6	1	2.9e-06	-9.6	1	4.88e-06	-9.6	1	2.58e-06	-9.6	1	3.18e-06	-10.1	1	3.74e-07	-9.6	1	8.33333e-07	-9.6	1
-9.51	1	4.53333e-06	-9.51	1	4.625e-06	-9.51	1	8.03e-06	-9	1	7.5e-07	-9.51	1	2.844e-06	-9.51	1	4.575e-06	-9.51	1	5.87e-06	-9.51	1	8.29e-06	-9	1	3.055e-06	-9	1	8.94444e-06	-9	1	3.045e-06	-9	1	5.08e-06	-9	1	2.76e-06	-9	1	3.32e-06	-9.51	1	4.18e-07	-9	1	8.86667e-07	-9	1
-8.91	1	4.8e-06	-8.91	1	4.895e-06	-8.91	1	8.37e-06	-8.4	1	8.13333e-07	-8.91	1	3.012e-06	-8.91	1	4.775e-06	-8.91	1	6.08e-06	-8.91	1	8.63e-06	-8.4	1	3.175e-06	-8.4	1	9.22222e-06	-8.4	1	3.195e-06	-8.4	1	5.36e-06	-8.4	1	2.95e-06	-8.4	1	3.45e-06	-8.91	1	4.675e-07	-8.4	1	9.4e-07	-8.4	1
-8.32	1	5.03333e-06	-8.32	1	5.15e-06	-8.32	1	8.65e-06	-7.8	1	8.83333e-07	-8.32	1	3.184e-06	-8.32	1	5e-06	-8.32	1	6.29e-06	-8.32	1	8.72e-06	-7.8	1	3.29e-06	-7.8	1	9.55556e-06	-7.8	1	3.345e-06	-7.8	1	5.64e-06	-7.8	1	3.15e-06	-7.8	1	3.59e-06	-8.32	1	5.2e-07	-7.8	1	1.00667e-06	-7.8	1
-7.73	1	5.3e-06	-7.73	1	5.45e-06	-7.73	1	8.96e-06	-7.2	1	9.53333e-07	-7.73	1	3.356e-06	-7.73	1	5.225e-06	-7.73	1	6.49e-06	-7.73	1	8.93e-06	-7.2	1	3.415e-06	-7.2	1	9.83333e-06	-7.2	1	3.5e-06	-7.2	1	5.93e-06	-7.2	1	3.35e-06	-7.2	1	3.73e-06	-7.73	1	5.8e-07	-7.2	1	1.07333e-06	-7.2	1
-7.13	1	5.56667e-06	-7.13	1	5.75e-06	-7.13	1	9.32e-06	-6.6	1	1.02667e-06	-7.13	1	3.536e-06	-7.13	1	5.425e-06	-7.13	1	6.71e-06	-7.13	1	9.21e-06	-6.6	1	3.54e-06	-6.6	1	1.01667e-05	-6.6	1	3.665e-06	-6.6	1	6.22e-06	-6.6	1	3.57e-06	-6.6	1	3.87e-06	-7.13	1	6.4e-07	-6.6	1	1.14e-06	-6.6	1
-6.54	1	5.83333e-06	-6.54	1	6.05e-06	-6.54	1	9.68e-06	-6	1	1.11e-06	-6.54	1	3.756e-06	-6.54	1	5.65e-06	-6.54	1	6.93e-06	-6.54	1	9.36e-06	-6	1	3.665e-06	-6	1	1.04444e-05	-6	1	3.83e-06	-6	1	6.52e-06	-6	1	3.79e-06	-6	1	4.03e-06	-6.54	1	6.95e-07	-6	1	1.21667e-06	-6	1
-5.94	1	6.1e-06	-5.94	1	6.35e-06	-5.94	1	1e-05	-5.4	1	1.18667e-06	-5.94	1	3.932e-06	-5.94	1	5.9e-06	-5.94	1	7.15e-06	-5.94	1	9.59e-06	-5.4	1	3.8e-06	-5.4	1	1.07778e-05	-5.4	1	3.995e-06	-5.4	1	6.83e-06	-5.4	1	4.01e-06	-5.4	1	4.19e-06	-5.94	1	7.7e-07	-5.4	1	1.28667e-06	-5.4	1
-5.35	1	6.36667e-06	-5.35	1	6.7e-06	-5.35	1	1.03e-05	-4.8	1	1.27667e-06	-5.35	1	4.12e-06	-5.35	1	6.125e-06	-5.35	1	7.37e-06	-5.35	1	9.82e-06	-4.8	1	3.93e-06	-4.8	1	1.11111e-05	-4.8	1	4.17e-06	-4.8	1	7.15e-06	-4.8	1	4.26e-06	-4.8	1	4.35e-06	-5.35	1	8.4e-07	-4.8	1	1.36667e-06	-4.8	1
-4.76	1	6.63333e-06	-4.76	1	7e-06	-4.76	1	1.07e-05	-4.2	1	1.36333e-06	-4.76	1	4.32e-06	-4.76	1	6.4e-06	-4.76	1	7.6e-06	-4.76	1	1.01e-05	-4.2	1	4.06e-06	-4.2	1	1.14444e-05	-4.2	1	4.345e-06	-4.2	1	7.48e-06	-4.2	1	4.5e-06	-4.2	1	4.5e-06	-4.76	1	9.15e-07	-4.2	1	1.44333e-06	-4.2	1
-4.16	1	6.93333e-06	-4.16	1	7.35e-06	-4.16	1	1.11e-05	-3.6	1	1.46667e-06	-4.16	1	4.56e-06	-4.16	1	6.65e-06	-4.16	1	7.83e-06	-4.16	1	1.03e-05	-3.6	1	4.2e-06	-3.6	1	1.17222e-05	-3.6	1	4.525e-06	-3.6	1	7.8e-06	-3.6	1	4.77e-06	-3.6	1	4.67e-06	-4.16	1	9.9e-07	-3.6	1	1.52333e-06	-3.6	1
-3.57	1	7.2e-06	-3.57	1	7.7e-06	-3.57	1	1.15e-05	-3	1	1.56667e-06	-3.57	1	4.72e-06	-3.57	1	6.9e-06	-3.57	1	8.06e-06	-3.57	1	1.06e-05	-3	1	4.345e-06	-3	1	1.21111e-05	-3	1	4.715e-06	-3	1	8.15e-06	-3	1	4.9e-06	-3	1	4.83e-06	-3.57	1	1.08e-06	-3	1	1.62e-06	-3	1
-2.97	1	7.53333e-06	-2.97	1	8.05e-06	-2.97	1	1.19e-05	-2.4	1	1.62e-06	-2.97	1	4.92e-06	-2.97	1	7.15e-06	-2.97	1	8.3e-06	-2.97	1	1.08e-05	-2.4	1	4.485e-06	-2.4	1	1.24444e-05	-2.4	1	4.905e-06	-2.4	1	8.5e-06	-2.4	1	5.19e-06	-2.4	1	4.9e-06	-2.97	1	1.185e-06	-2.4	1	1.66333e-06	-2.4	1
-2.38	1	7.83333e-06	-2.38	1	8.4e-06	-2.38	1	1.23e-05	-1.8	1	1.73e-06	-2.38	1	5.16e-06	-2.38	1	7.4e-06	-2.38	1	8.54e-06	-2.38	1	1.1e-05	-1.8	1	4.63e-06	-1.8	1	1.28333e-05	-1.8	1	5.1e-06	-1.8	1	8.85e-06	-1.8	1	5.48e-06	-1.8	1	5.08e-06	-2.38	1	1.28e-06	-1.8	1	1.76333e-06	-1.8	1
-1.78	1	8.16667e-06	-1.78	1	8.8e-06	-1.78	1	1.27e-05	-1.2	1	1.84333e-06	-1.78	1	5.48e-06	-1.78	1	7.675e-06	-1.78	1	8.79e-06	-1.78	1	1.13e-05	-1.2	1	4.78e-06	-1.2	1	1.31667e-05	-1.2	1	5.3e-06	-1.2	1	9.22e-06	-1.2	1	5.79e-06	-1.2	1	5.26e-06	-1.78	1	1.365e-06	-1.2	1	1.85667e-06	-1.2	1
-1.19	1	8.46667e-06	-1.19	1	9.15e-06	-1.19	1	1.3e-05	-0.6	1	1.96333e-06	-1.19	1	5.72e-06	-1.19	1	7.95e-06	-1.19	1	9.04e-06	-1.19	1	1.15e-05	-0.6	1	4.93e-06	-0.6	1	1.35556e-05	-0.6	1	5.5e-06	-0.6	1	9.59e-06	-0.6	1	6.09e-06	-0.6	1	5.45e-06	-1.19	1	1.475e-06	-0.6	1	1.95333e-06	-0.6	1
-0.595	1	8.8e-06	-0.595	1	9.55e-06	-0.595	1	1.34e-05	0	1	2.08333e-06	-0.595	1	5.92e-06	-0.595	1	8.225e-06	-0.595	1	9.29e-06	-0.595	1	1.17e-05	0	1	5.1e-06	0	1	1.38333e-05	0	1	5.7e-06	0	1	9.97e-06	0	1	6.42e-06	0	1	5.64e-06	-0.595	1	1.58e-06	0	1	2.06e-06	0	1
0	1	9.1e-06	0	1	9.95e-06	0	1	1.38e-05	0.6	1	2.20333e-06	0	1	6.16e-06	0	1	8.475e-06	0	1	9.55e-06	0	1	1.21e-05	0.6	1	5.25e-06	0.6	1	1.42222e-05	0.6	1	5.9e-06	0.6	1	1.04e-05	0.6	1	6.75e-06	0.6	1	5.83e-06	0	1	1.705e-06	0.6	1	2.16667e-06	0.6	1
0.595	1	9.43333e-06	0.595	1	1.03e-05	0.595	1	1.42e-05	1.2	1	2.33333e-06	0.595	1	6.36e-06	0.595	1	8.75e-06	0.595	1	9.81e-06	0.595	1	1.23e-05	1.2	1	5.4e-06	1.2	1	1.46111e-05	1.2	1	6.15e-06	1.2	1	1.07e-05	1.2	1	7.1e-06	1.2	1	6.02e-06	0.595	1	1.82e-06	1.2	1	2.28333e-06	1.2	1
1.19	1	9.76667e-06	1.19	1	1.075e-05	1.19	1	1.46e-05	1.8	1	2.46667e-06	1.19	1	6.64e-06	1.19	1	9.025e-06	1.19	1	1.01e-05	1.19	1	1.26e-05	1.8	1	5.55e-06	1.8	1	1.5e-05	1.8	1	6.35e-06	1.8	1	1.11e-05	1.8	1	7.44e-06	1.8	1	6.22e-06	1.19	1	1.945e-06	1.8	1	2.4e-06	1.8	1
1.78	1	1.01333e-05	1.78	1	1.115e-05	1.78	1	1.5e-05	2.4	1	2.6e-06	1.78	1	6.96e-06	1.78	1	9.325e-06	1.78	1	1.03e-05	1.78	1	1.28e-05	2.4	1	5.7e-06	2.4	1	1.53889e-05	2.4	1	6.6e-06	2.4	1	1.15e-05	2.4	1	7.81e-06	2.4	1	6.43e-06	1.78	1	2.07e-06	2.4	1	2.51333e-06	2.4	1
2.38	1	1.04667e-05	2.38	1	1.155e-05	2.38	1	1.55e-05	3	1	2.74667e-06	2.38	1	7.12e-06	2.38	1	9.625e-06	2.38	1	1.06e-05	2.38	1	1.31e-05	3	1	5.85e-06	3	1	1.57222e-05	3	1	6.8e-06	3	1	1.2e-05	3	1	8.18e-06	3	1	6.61e-06	2.38	1	2.21e-06	3	1	2.63333e-06	3	1
2.97	1	1.08333e-05	2.97	1	1.2e-05	2.97	1	1.59e-05	3.6	1	2.89333e-06	2.97	1	7.4e-06	2.97	1	9.925e-06	2.97	1	1.09e-05	2.97	1	1.34e-05	3.6	1	6.05e-06	3.6	1	1.61111e-05	3.6	1	7.05e-06	3.6	1	1.24e-05	3.6	1	8.57e-06	3.6	1	6.83e-06	2.97	1	2.37e-06	3.6	1	2.76667e-06	3.6	1
3.57	1	1.12e-05	3.57	1	1.245e-05	3.57	1	1.63e-05	4.2	1	3.04333e-06	3.57	1	7.72e-06	3.57	1	1.0225e-05	3.57	1	1.12e-05	3.57	1	1.36e-05	4.2	1	6.2e-06	4.2	1	1.65e-05	4.2	1	7.3e-06	4.2	1	1.28e-05	4.2	1	8.96e-06	4.2	1	7.05e-06	3.57	1	2.435e-06	4.2	1	2.89667e-06	4.2	1
4.16	1	1.15333e-05	4.16	1	1.29e-05	4.16	1	1.67e-05	4.8	1	3.20333e-06	4.16	1	7.96e-06	4.16	1	1.055e-05	4.16	1	1.14e-05	4.16	1	1.39e-05	4.8	1	6.35e-06	4.8	1	1.68889e-05	4.8	1	7.5e-06	4.8	1	1.32e-05	4.8	1	9.36e-06	4.8	1	7.26e-06	4.16	1	2.585e-06	4.8	1	3.02667e-06	4.8	1
4.75	1	1.19333e-05	4.75	1	1.33e-05	4.75	1	1.72e-05	5.4	1	3.36667e-06	4.75	1	8.2e-06	4.75	1	1.0875e-05	4.75	1	1.17e-05	4.75	1	1.41e-05	5.4	1	6.55e-06	5.4	1	1.72778e-05	5.4	1	7.75e-06	5.4	1	1.37e-05	5.4	1	9.8e-06	5.4	1	7.48e-06	4.75	1	2.74e-06	5.4	1	3.15667e-06	5.4	1
5.35	1	1.23e-05	5.35	1	1.375e-05	5.35	1	1.76e-05	6	1	3.53333e-06	5.35	1	8.52e-06	5.35	1	1.115e-05	5.35	1	1.2e-05	5.35	1	1.44e-05	6	1	6.7e-06	6	1	1.76667e-05	6	1	8e-06	6	1	1.41e-05	6	1	1.02e-05	6	1	7.7e-06	5.35	1	2.905e-06	6	1	3.29667e-06	6	1
5.94	1	1.26667e-05	5.94	1	1.425e-05	5.94	1	1.81e-05	6.6	1	3.7e-06	5.94	1	8.76e-06	5.94	1	1.1475e-05	5.94	1	1.23e-05	5.94	1	1.47e-05	6.6	1	6.9e-06	6.6	1	1.81111e-05	6.6	1	8.25e-06	6.6	1	1.45e-05	6.6	1	1.07e-05	6.6	1	7.91e-06	5.94	1	3.065e-06	6.6	1	3.43333e-06	6.6	1
6.54	1	1.30667e-05	6.54	1	1.475e-05	6.54	1	1.86e-05	7.2	1	3.86667e-06	6.54	1	9.08e-06	6.54	1	1.18e-05	6.54	1	1.26e-05	6.54	1	1.5e-05	7.2	1	7.05e-06	7.2	1	1.85e-05	7.2	1	8.5e-06	7.2	1	1.5e-05	7.2	1	1.11e-05	7.2	1	8.15e-06	6.54	1	3.245e-06	7.2	1	3.6e-06	7.2	1
7.13	1	1.34667e-05	7.13	1	1.52e-05	7.13	1	1.9e-05	7.8	1	4.06667e-06	7.13	1	9.36e-06	7.13	1	1.2125e-05	7.13	1	1.29e-05	7.13	1	1.52e-05	7.8	1	7.25e-06	7.8	1	1.88889e-05	7.8	1	8.8e-06	7.8	1	1.55e-05	7.8	1	1.16e-05	7.8	1	8.37e-06	7.13	1	3.43e-06	7.8	1	3.73333e-06	7.8	1
7.73	1	1.38667e-05	7.73	1	1.57e-05	7.73	1	1.94e-05	8.4	1	4.23333e-06	7.73	1	9.72e-06	7.73	1	1.245e-05	7.73	1	1.32e-05	7.73	1	1.55e-05	8.4	1	7.45e-06	8.4	1	1.93889e-05	8.4	1	9.05e-06	8.4	1	1.59e-05	8.4	1	1.2e-05	8.4	1	8.61e-06	7.73	1	3.605e-06	8.4	1	3.9e-06	8.4	1
8.32	1	1.42333e-05	8.32	1	1.62e-05	8.32	1	1.99e-05	9	1	4.43333e-06	8.32	1	1.004e-05	8.32	1	1.265e-05	8.32	1	1.35e-05	8.32	1	1.58e-05	9	1	7.65e-06	9	1	1.97778e-05	9	1	9.35e-06	9	1	1.64e-05	9	1	1.25e-05	9	1	8.84e-06	8.32	1	3.8e-06	9	1	4.03333e-06	9	1
8.91	1	1.46667e-05	8.91	1	1.665e-05	8.91	1	2.03e-05	9.6	1	4.63333e-06	8.91	1	1.032e-05	8.91	1	1.2975e-05	8.91	1	1.38e-05	8.91	1	1.61e-05	9.6	1	7.8e-06	9.6	1	2.02778e-05	9.6	1	9.6e-06	9.6	1	1.69e-05	9.6	1	1.3e-05	9.6	1	9.08e-06	8.91	1	4.01e-06	9.6	1	4.2e-06	9.6	1
9.51	1	1.50333e-05	9.51	1	1.715e-05	9.51	1	2.08e-05	10.2	1	4.83333e-06	9.51	1	1.056e-05	9.51	1	1.3325e-05	9.51	1	1.41e-05	9.51	1	1.63e-05	10.2	1	8e-06	10.2	1	2.06111e-05	10.2	1	9.9e-06	10.2	1	1.73e-05	10.2	1	1.35e-05	10.2	1	9.33e-06	9.51	1	4.215e-06	10.2	1	4.36667e-06	10.2	1
10.1	1	1.54667e-05	10.1	1	1.77e-05	10.1	1	2.13e-05	10.8	1	5.03333e-06	10.1	1	1.088e-05	10.1	1	1.365e-05	10.1	1	1.44e-05	10.1	1	1.67e-05	10.8	1	8.2e-06	10.8	1	2.10556e-05	10.8	1	1.015e-05	10.8	1	1.78e-05	10.8	1	1.4e-05	10.8	1	9.56e-06	10.1	1	4.425e-06	10.8	1	4.53333e-06	10.8	1
10.7	1	1.59e-05	10.7	1	1.82e-05	10.7	1	2.18e-05	11.4	1	5.23333e-06	10.7	1	1.128e-05	10.7	1	1.395e-05	10.7	1	1.47e-05	10.7	1	1.69e-05	11.4	1	8.4e-06	11.4	1	2.15e-05	11.4	1	1.045e-05	11.4	1	1.83e-05	11.4	1	1.45e-05	11.4	1	9.81e-06	10.7	1	4.625e-06	11.4	1	4.7e-06	11.4	1
11.3	1	1.63e-05	11.3	1	1.87e-05	11.3	1	2.22e-05	12	1	5.43333e-06	11.3	1	1.156e-05	11.3	1	1.43e-05	11.3	1	1.51e-05	11.3	1	1.72e-05	12	1	8.6e-06	12	1	2.19444e-05	12	1	1.075e-05	12	1	1.88e-05	12	1	1.51e-05	12	1	1.01e-05	11.3	1	4.84e-06	12	1	4.9e-06	12	1
11.9	1	1.65667e-05	11.9	1	1.925e-05	11.9	1	2.27e-05	12.6	1	5.66667e-06	11.9	1	1.188e-05	11.9	1	1.4625e-05	11.9	1	1.54e-05	11.9	1	1.75e-05	12.6	1	8.8e-06	12.6	1	2.23333e-05	12.6	1	1.105e-05	12.6	1	1.93e-05	12.6	1	1.56e-05	12.6	1	1.03e-05	11.9	1	5.05e-06	12.6	1	5.06667e-06	12.6	1
12.5	1	1.69667e-05	12.5	1	1.975e-05	12.5	1	2.32e-05	13.2	1	5.9e-06	12.5	1	1.22e-05	12.5	1	1.495e-05	12.5	1	1.57e-05	12.5	1	1.78e-05	13.2	1	9e-06	13.2	1	2.27778e-05	13.2	1	1.135e-05	13.2	1	1.98e-05	13.2	1	1.62e-05	13.2	1	1.06e-05	12.5	1	5.3e-06	13.2	1	5.23333e-06	13.2	1
13.1	1	1.73667e-05	13.1	1	2.03e-05	13.1	1	2.37e-05	13.8	1	6.13333e-06	13.1	1	1.26e-05	13.1	1	1.53e-05	13.1	1	1.6e-05	13.1	1	1.81e-05	13.8	1	9.2e-06	13.8	1	2.32778e-05	13.8	1	1.165e-05	13.8	1	2.03e-05	13.8	1	1.67e-05	13.8	1	1.08e-05	13.1	1	5.55e-06	13.8	1	5.4e-06	13.8	1
13.7	1	1.78333e-05	13.7	1	2.08e-05	13.7	1	2.41e-05	14.4	1	6.36667e-06	13.7	1	1.28e-05	13.7	1	1.565e-05	13.7	1	1.64e-05	13.7	1	1.84e-05	14.4	1	9.4e-06	14.4	1	2.36667e-05	14.4	1	1.195e-05	14.4	1	2.08e-05	14.4	1	1.73e-05	14.4	1	1.11e-05	13.7	1	5.8e-06	14.4	1	5.6e-06	14.4	1
14.3	1	1.82667e-05	14.3	1	2.14e-05	14.3	1	2.47e-05	15	1	6.6e-06	14.3	1	1.32e-05	14.3	1	1.5975e-05	14.3	1	1.67e-05	14.3	1	1.86e-05	15	1	9.6e-06	15	1	2.41667e-05	15	1	1.225e-05	15	1	2.13e-05	15	1	1.79e-05	15	1	1.14e-05	14.3	1	6e-06	15	1	5.8e-06	15	1
14.9	1	1.87333e-05	14.9	1	2.195e-05	14.9	1	2.51e-05	15.6	1	6.83333e-06	14.9	1	1.364e-05	14.9	1	1.63e-05	14.9	1	1.7e-05	14.9	1	1.89e-05	15.6	1	9.85e-06	15.6	1	2.46667e-05	15.6	1	1.255e-05	15.6	1	2.18e-05	15.6	1	1.85e-05	15.6	1	1.16e-05	14.9	1	6.25e-06	15.6	1	5.96667e-06	15.6	1
15.4	1	1.91667e-05	15.4	1	2.255e-05	15.4	1	2.55e-05	16.2	1	7.1e-06	15.4	1	1.4e-05	15.4	1	1.665e-05	15.4	1	1.74e-05	15.4	1	1.92e-05	16.2	1	1.005e-05	16.2	1	2.51111e-05	16.2	1	1.29e-05	16.2	1	2.24e-05	16.2	1	1.91e-05	16.2	1	1.19e-05	15.4	1	6.5e-06	16.2	1	6.16667e-06	16.2	1
16	1	1.96e-05	16	1	2.31e-05	16	1	2.6e-05	16.8	1	7.33333e-06	16	1	1.44e-05	16	1	1.7025e-05	16	1	1.77e-05	16	1	1.95e-05	16.8	1	1.025e-05	16.8	1	2.55556e-05	16.8	1	1.32e-05	16.8	1	2.29e-05	16.8	1	1.97e-05	16.8	1	1.22e-05	16	1	6.75e-06	16.8	1	6.36667e-06	16.8	1
16.6	1	2.00333e-05	16.6	1	2.365e-05	16.6	1	2.66e-05	17.4	1	7.6e-06	16.6	1	1.468e-05	16.6	1	1.7325e-05	16.6	1	1.81e-05	16.6	1	1.99e-05	17.4	1	1.045e-05	17.4	1	2.6e-05	17.4	1	1.355e-05	17.4	1	2.34e-05	17.4	1	2.03e-05	17.4	1	1.25e-05	16.6	1	7e-06	17.4	1	6.56667e-06	17.4	1
17.2	1	2.04667e-05	17.2	1	2.425e-05	17.2	1	2.71e-05	18	1	7.86667e-06	17.2	1	1.504e-05	17.2	1	1.77e-05	17.2	1	1.84e-05	17.2	1	2.02e-05	18	1	1.07e-05	18	1	2.65e-05	18	1	1.385e-05	18	1	2.4e-05	18	1	2.1e-05	18	1	1.27e-05	17.2	1	7.3e-06	18	1	6.8e-06	18	1
17.8	1	2.09333e-05	17.8	1	2.48e-05	17.8	1	2.77e-05	18.6	1	8.1e-06	17.8	1	1.54e-05	17.8	1	1.8e-05	17.8	1	1.88e-05	17.8	1	2.05e-05	18.6	1	1.09e-05	18.6	1	2.69444e-05	18.6	1	1.42e-05	18.6	1	2.45e-05	18.6	1	2.16e-05	18.6	1	1.3e-05	17.8	1	7.55e-06	18.6	1	7e-06	18.6	1
18.4	1	2.14333e-05	18.4	1	2.53e-05	18.4	1	2.82e-05	19.2	1	8.36667e-06	18.4	1	1.552e-05	18.4	1	1.84e-05	18.4	1	1.91e-05	18.4	1	2.08e-05	19.2	1	1.115e-05	19.2	1	2.74444e-05	19.2	1	1.455e-05	19.2	1	2.51e-05	19.2	1	2.23e-05	19.2	1	1.33e-05	18.4	1	7.85e-06	19.2	1	7.2e-06	19.2	1
19	1	2.18333e-05	19	1	2.595e-05	19	1	2.88e-05	19.8	1	8.66667e-06	19	1	1.604e-05	19	1	1.875e-05	19	1	1.95e-05	19	1	2.1e-05	19.8	1	1.135e-05	19.8	1	2.77778e-05	19.8	1	1.49e-05	19.8	1	2.56e-05	19.8	1	2.3e-05	19.8	1	1.36e-05	19	1	8.1e-06	19.8	1	7.43333e-06	19.8	1
19.6	1	2.23e-05	19.6	1	2.655e-05	19.6	1	2.93e-05	20.4	1	8.93333e-06	19.6	1	1.632e-05	19.6	1	1.9075e-05	19.6	1	1.98e-05	19.6	1	2.14e-05	20.4	1	1.16e-05	20.4	1	2.82778e-05	20.4	1	1.52e-05	20.4	1	2.62e-05	20.4	1	2.36e-05	20.4	1	1.39e-05	19.6	1	8.4e-06	20.4	1	7.63333e-06	20.4	1
20.2	1	2.27667e-05	20.2	1	2.715e-05	20.2	1	2.98e-05	21	1	9.23333e-06	20.2	1	1.676e-05	20.2	1	1.94e-05	20.2	1	2.02e-05	20.2	1	2.17e-05	21	1	1.18e-05	21	1	2.88333e-05	21	1	1.555e-05	21	1	2.67e-05	21	1	2.43e-05	21	1	1.42e-05	20.2	1	8.65e-06	21	1	7.86667e-06	21	1
20.8	1	2.32667e-05	20.8	1	2.775e-05	20.8	1	3.03e-05	21.6	1	9.53333e-06	20.8	1	1.708e-05	20.8	1	1.975e-05	20.8	1	2.06e-05	20.8	1	2.2e-05	21.6	1	1.205e-05	21.6	1	2.93333e-05	21.6	1	1.59e-05	21.6	1	2.73e-05	21.6	1	2.5e-05	21.6	1	1.45e-05	20.8	1	9e-06	21.6	1	8.1e-06	21.6	1
21.4	1	2.37333e-05	21.4	1	2.835e-05	21.4	1	3.09e-05	22.2	1	9.83333e-06	21.4	1	1.748e-05	21.4	1	2.01e-05	21.4	1	2.09e-05	21.4	1	2.23e-05	22.2	1	1.23e-05	22.2	1	2.98333e-05	22.2	1	1.625e-05	22.2	1	2.78e-05	22.2	1	2.57e-05	22.2	1	1.48e-05	21.4	1	9.3e-06	22.2	1	8.33333e-06	22.2	1
22	1	2.42333e-05	22	1	2.895e-05	22	1	3.14e-05	22.8	1	1.01333e-05	22	1	1.78e-05	22	1	2.045e-05	22	1	2.13e-05	22	1	2.26e-05	22.8	1	1.25e-05	22.8	1	3.03333e-05	22.8	1	1.665e-05	22.8	1	2.84e-05	22.8	1	2.64e-05	22.8	1	1.51e-05	22	1	9.6e-06	22.8	1	8.56667e-06	22.8	1
22.6	1	2.47667e-05	22.6	1	2.96e-05	22.6	1	3.2e-05	23.4	1	1.04333e-05	22.6	1	1.82e-05	22.6	1	2.08e-05	22.6	1	2.17e-05	22.6	1	2.3e-05	23.4	1	1.275e-05	23.4	1	3.08333e-05	23.4	1	1.7e-05	23.4	1	2.89e-05	23.4	1	2.72e-05	23.4	1	1.54e-05	22.6	1	9.9e-06	23.4	1	8.8e-06	23.4	1
23.2	1	2.52333e-05	23.2	1	3.025e-05	23.2	1	3.25e-05	24	1	1.07667e-05	23.2	1	1.848e-05	23.2	1	2.1175e-05	23.2	1	2.21e-05	23.2	1	2.34e-05	24	1	1.3e-05	24	1	3.13333e-05	24	1	1.735e-05	24	1	2.95e-05	24	1	2.79e-05	24	1	1.57e-05	23.2	1	1.02e-05	24	1	9.03333e-06	24	1
23.8	1	2.57e-05	23.8	1	3.085e-05	23.8	1	3.31e-05	24.6	1	1.10667e-05	23.8	1	1.892e-05	23.8	1	2.1525e-05	23.8	1	2.24e-05	23.8	1	2.37e-05	24.6	1	1.325e-05	24.6	1	3.18333e-05	24.6	1	1.775e-05	24.6	1	3.01e-05	24.6	1	2.87e-05	24.6	1	1.6e-05	23.8	1	1.05e-05	24.6	1	9.3e-06	24.6	1
24.4	1	2.61667e-05	24.4	1	3.145e-05	24.4	1	3.36e-05	25.2	1	1.14e-05	24.4	1	1.924e-05	24.4	1	2.1875e-05	24.4	1	2.28e-05	24.4	1	2.39e-05	25.2	1	1.35e-05	25.2	1	3.23889e-05	25.2	1	1.81e-05	25.2	1	3.06e-05	25.2	1	2.94e-05	25.2	1	1.63e-05	24.4	1	1.08e-05	25.2	1	9.53333e-06	25.2	1
25	1	2.66667e-05	25	1	3.205e-05	25	1	3.42e-05	25.8	1	1.17333e-05	25	1	1.976e-05	25	1	2.2275e-05	25	1	2.32e-05	25	1	2.42e-05	25.8	1	1.375e-05	25.8	1	3.29444e-05	25.8	1	1.845e-05	25.8	1	3.12e-05	25.8	1	3.02e-05	25.8	1	1.67e-05	25	1	1.11e-05	25.8	1	9.76667e-06	25.8	1
25.5	1	2.71e-05	25.5	1	3.275e-05	25.5	1	3.47e-05	26.4	1	1.20333e-05	25.5	1	1.996e-05	25.5	1	2.2625e-05	25.5	1	2.36e-05	25.5	1	2.45e-05	26.4	1	1.395e-05	26.4	1	3.34444e-05	26.4	1	1.885e-05	26.4	1	3.18e-05	26.4	1	3.1e-05	26.4	1	1.7e-05	25.5	1	1.145e-05	26.4	1	1.00333e-05	26.4	1
26.1	1	2.76e-05	26.1	1	3.335e-05	26.1	1	3.52e-05	27	1	1.23667e-05	26.1	1	2.032e-05	26.1	1	2.295e-05	26.1	1	2.4e-05	26.1	1	2.48e-05	27	1	1.425e-05	27	1	3.4e-05	27	1	1.925e-05	27	1	3.24e-05	27	1	3.17e-05	27	1	1.73e-05	26.1	1	1.18e-05	27	1	1.03e-05	27	1
26.7	1	2.81333e-05	26.7	1	3.405e-05	26.7	1	3.58e-05	27.6	1	1.27e-05	26.7	1	2.08e-05	26.7	1	2.335e-05	26.7	1	2.44e-05	26.7	1	2.5e-05	27.6	1	1.45e-05	27.6	1	3.45556e-05	27.6	1	1.965e-05	27.6	1	3.29e-05	27.6	1	3.25e-05	27.6	1	1.77e-05	26.7	1	1.21e-05	27.6	1	1.05667e-05	27.6	1
27.3	1	2.85667e-05	27.3	1	3.47e-05	27.3	1	3.63e-05	28.2	1	1.30333e-05	27.3	1	2.108e-05	27.3	1	2.3675e-05	27.3	1	2.48e-05	27.3	1	2.57e-05	28.2	1	1.475e-05	28.2	1	3.51111e-05	28.2	1	2e-05	28.2	1	3.35e-05	28.2	1	3.33e-05	28.2	1	1.8e-05	27.3	1	1.245e-05	28.2	1	1.08333e-05	28.2	1
27.9	1	2.90333e-05	27.9	1	3.535e-05	27.9	1	3.68e-05	28.8	1	1.33667e-05	27.9	1	2.152e-05	27.9	1	2.4025e-05	27.9	1	2.52e-05	27.9	1	2.61e-05	28.8	1	1.5e-05	28.8	1	3.56111e-05	28.8	1	2.04e-05	28.8	1	3.41e-05	28.8	1	3.41e-05	28.8	1	1.83e-05	27.9	1	1.275e-05	28.8	1	1.10667e-05	28.8	1
28.5	1	2.95667e-05	28.5	1	3.605e-05	28.5	1	3.75e-05	29.4	1	1.37333e-05	28.5	1	2.188e-05	28.5	1	2.4375e-05	28.5	1	2.56e-05	28.5	1	2.64e-05	29.4	1	1.525e-05	29.4	1	3.61667e-05	29.4	1	2.08e-05	29.4	1	3.47e-05	29.4	1	3.5e-05	29.4	1	1.87e-05	28.5	1	1.31e-05	29.4	1	1.13333e-05	29.4	1
29.1	1	3.01e-05	29.1	1	3.67e-05	29.1	1	3.8e-05	30	1	1.41e-05	29.1	1	2.228e-05	29.1	1	2.4725e-05	29.1	1	2.6e-05	29.1	1	2.67e-05	30	1	1.55e-05	30	1	3.66667e-05	30	1	2.12e-05	30	1	3.53e-05	30	1	3.58e-05	30	1	1.9e-05	29.1	1	1.345e-05	30	1	1.16e-05	30	1
29.7	1	3.06e-05	29.7	1	3.735e-05	29.7	1	3.86e-05	30.6	1	1.44333e-05	29.7	1	2.272e-05	29.7	1	2.5e-05	29.7	1	2.64e-05	29.7	1	2.7e-05	30.6	1	1.575e-05	30.6	1	3.71667e-05	30.6	1	2.16e-05	30.6	1	3.59e-05	30.6	1	3.66e-05	30.6	1	1.94e-05	29.7	1	1.38e-05	30.6	1	1.19e-05	30.6	1
30.3	1	3.10667e-05	30.3	1	3.8e-05	30.3	1	3.91e-05	31.2	1	1.48e-05	30.3	1	2.312e-05	30.3	1	2.55e-05	30.3	1	2.68e-05	30.3	1	2.74e-05	31.2	1	1.605e-05	31.2	1	3.77222e-05	31.2	1	2.2e-05	31.2	1	3.65e-05	31.2	1	3.75e-05	31.2	1	1.97e-05	30.3	1	1.415e-05	31.2	1	1.21667e-05	31.2	1
30.9	1	3.15667e-05	30.9	1	3.865e-05	30.9	1	3.98e-05	31.8	1	1.51667e-05	30.9	1	2.356e-05	30.9	1	2.575e-05	30.9	1	2.72e-05	30.9	1	2.77e-05	31.8	1	1.63e-05	31.8	1	3.82778e-05	31.8	1	2.24e-05	31.8	1	3.7e-05	31.8	1	3.84e-05	31.8	1	2e-05	30.9	1	1.45e-05	31.8	1	1.24333e-05	31.8	1
31.5	1	3.21e-05	31.5	1	3.94e-05	31.5	1	4.03e-05	32.4	1	1.55333e-05	31.5	1	2.396e-05	31.5	1	2.625e-05	31.5	1	2.76e-05	31.5	1	2.81e-05	32.4	1	1.655e-05	32.4	1	3.88333e-05	32.4	1	2.285e-05	32.4	1	3.76e-05	32.4	1	3.92e-05	32.4	1	2.04e-05	31.5	1	1.485e-05	32.4	1	1.27e-05	32.4	1
32.1	1	3.27333e-05	32.1	1	4.005e-05	32.1	1	4.09e-05	33	1	1.59e-05	32.1	1	2.444e-05	32.1	1	2.65e-05	32.1	1	2.8e-05	32.1	1	2.84e-05	33	1	1.68e-05	33	1	3.93889e-05	33	1	2.325e-05	33	1	3.82e-05	33	1	4.01e-05	33	1	2.07e-05	32.1	1	1.525e-05	33	1	1.3e-05	33	1
32.7	1	3.31667e-05	32.7	1	4.07e-05	32.7	1	4.14e-05	33.6	1	1.63e-05	32.7	1	2.468e-05	32.7	1	2.7e-05	32.7	1	2.84e-05	32.7	1	2.87e-05	33.6	1	1.71e-05	33.6	1	3.99444e-05	33.6	1	2.365e-05	33.6	1	3.88e-05	33.6	1	4.1e-05	33.6	1	2.11e-05	32.7	1	1.56e-05	33.6	1	1.33e-05	33.6	1
33.3	1	3.36667e-05	33.3	1	4.135e-05	33.3	1	4.2e-05	34.2	1	1.65e-05	33.3	1	2.528e-05	33.3	1	2.725e-05	33.3	1	2.88e-05	33.3	1	2.9e-05	34.2	1	1.735e-05	34.2	1	4.05556e-05	34.2	1	2.41e-05	34.2	1	3.94e-05	34.2	1	4.19e-05	34.2	1	2.14e-05	33.3	1	1.595e-05	34.2	1	1.36e-05	34.2	1
33.9	1	3.4e-05	33.9	1	4.21e-05	33.9	1	4.27e-05	34.8	1	1.69e-05	33.9	1	2.568e-05	33.9	1	2.775e-05	33.9	1	2.92e-05	33.9	1	2.93e-05	34.8	1	1.765e-05	34.8	1	4.11111e-05	34.8	1	2.45e-05	34.8	1	4e-05	34.8	1	4.28e-05	34.8	1	2.18e-05	33.9	1	1.63e-05	34.8	1	1.39e-05	34.8	1
34.5	1	3.46667e-05	34.5	1	4.28e-05	34.5	1	4.32e-05	35.4	1	1.73333e-05	34.5	1	2.596e-05	34.5	1	2.8e-05	34.5	1	2.97e-05	34.5	1	2.97e-05	35.4	1	1.79e-05	35.4	1	4.17222e-05	35.4	1	2.495e-05	35.4	1	4.06e-05	35.4	1	4.37e-05	35.4	1	2.22e-05	34.5	1	1.665e-05	35.4	1	1.41667e-05	35.4	1
35.1	1	3.5e-05	35.1	1	4.345e-05	35.1	1	4.37e-05	36	1	1.77333e-05	35.1	1	2.648e-05	35.1	1	2.825e-05	35.1	1	3.01e-05	35.1	1	3e-05	36	1	1.82e-05	36	1	4.22222e-05	36	1	2.535e-05	36	1	4.12e-05	36	1	4.46e-05	36	1	2.25e-05	35.1	1	1.7e-05	36	1	1.44667e-05	36	1
35.6	1	3.56667e-05	35.6	1	4.415e-05	35.6	1	4.44e-05	36.6	1	1.81333e-05	35.6	1	2.688e-05	35.6	1	2.875e-05	35.6	1	3.05e-05	35.6	1	3.03e-05	36.6	1	1.845e-05	36.6	1	4.27222e-05	36.6	1	2.575e-05	36.6	1	4.18e-05	36.6	1	4.55e-05	36.6	1	2.29e-05	35.6	1	1.74e-05	36.6	1	1.47667e-05	36.6	1
36.2	1	3.63333e-05	36.2	1	4.485e-05	36.2	1	4.49e-05	37.2	1	1.85333e-05	36.2	1	2.736e-05	36.2	1	2.9e-05	36.2	1	3.1e-05	36.2	1	3.07e-05	37.2	1	1.875e-05	37.2	1	4.33333e-05	37.2	1	2.62e-05	37.2	1	4.24e-05	37.2	1	4.65e-05	37.2	1	2.33e-05	36.2	1	1.775e-05	37.2	1	1.51e-05	37.2	1
36.8	1	3.66667e-05	36.8	1	4.56e-05	36.8	1	4.54e-05	37.8	1	1.89667e-05	36.8	1	2.776e-05	36.8	1	2.95e-05	36.8	1	3.14e-05	36.8	1	3.1e-05	37.8	1	1.9e-05	37.8	1	4.38889e-05	37.8	1	2.665e-05	37.8	1	4.3e-05	37.8	1	4.74e-05	37.8	1	2.37e-05	36.8	1	1.815e-05	37.8	1	1.54e-05	37.8	1
37.4	1	3.73333e-05	37.4	1	4.63e-05	37.4	1	4.6e-05	38.4	1	1.93667e-05	37.4	1	2.812e-05	37.4	1	2.975e-05	37.4	1	3.18e-05	37.4	1	3.13e-05	38.4	1	1.93e-05	38.4	1	4.44444e-05	38.4	1	2.705e-05	38.4	1	4.36e-05	38.4	1	4.83e-05	38.4	1	2.4e-05	37.4	1	1.855e-05	38.4	1	1.57e-05	38.4	1
38	1	3.76667e-05	38	1	4.7e-05	38	1	4.66e-05	39	1	1.98e-05	38	1	2.856e-05	38	1	3.025e-05	38	1	3.23e-05	38	1	3.16e-05	39	1	1.96e-05	39	1	4.5e-05	39	1	2.75e-05	39	1	4.42e-05	39	1	4.93e-05	39	1	2.44e-05	38	1	1.89e-05	39	1	1.60333e-05	39	1
38.6	1	3.83333e-05	38.6	1	4.77e-05	38.6	1	4.7e-05	39.6	1	2.02333e-05	38.6	1	2.9e-05	38.6	1	3.05e-05	38.6	1	3.27e-05	38.6	1	3.2e-05	39.6	1	1.985e-05	39.6	1	4.55556e-05	39.6	1	2.795e-05	39.6	1	4.48e-05	39.6	1	4.99e-05	39.6	1	2.48e-05	38.6	1	1.925e-05	39.6	1	1.63333e-05	39.6	1
39.2	1	3.86667e-05	39.2	1	4.84e-05	39.2	1	4.76e-05	40.2	1	2.06667e-05	39.2	1	2.944e-05	39.2	1	3.075e-05	39.2	1	3.31e-05	39.2	1	3.24e-05	40.2	1	2.015e-05	40.2	1	4.61667e-05	40.2	1	2.84e-05	40.2	1	4.54e-05	40.2	1	5.1e-05	40.2	1	2.51e-05	39.2	1	1.965e-05	40.2	1	1.66333e-05	40.2	1
39.8	1	3.93333e-05	39.8	1	4.915e-05	39.8	1	4.82e-05	40.8	1	2.10667e-05	39.8	1	2.984e-05	39.8	1	3.125e-05	39.8	1	3.36e-05	39.8	1	3.27e-05	40.8	1	2.045e-05	40.8	1	4.68333e-05	40.8	1	2.89e-05	40.8	1	4.61e-05	40.8	1	5.19e-05	40.8	1	2.55e-05	39.8	1	2.005e-05	40.8	1	1.68333e-05	40.8	1
40.4	1	4e-05	40.4	1	4.985e-05	40.4	1	4.87e-05	41.4	1	2.15e-05	40.4	1	3.032e-05	40.4	1	3.15e-05	40.4	1	3.4e-05	40.4	1	3.29e-05	41.4	1	2.075e-05	41.4	1	4.73889e-05	41.4	1	2.935e-05	41.4	1	4.67e-05	41.4	1	5.29e-05	41.4	1	2.59e-05	40.4	1	2.045e-05	41.4	1	1.71667e-05	41.4	1
41	1	4.03333e-05	41	1	5.05e-05	41	1	4.95e-05	42	1	2.19333e-05	41	1	3.076e-05	41	1	3.2e-05	41	1	3.45e-05	41	1	3.32e-05	42	1	2.105e-05	42	1	4.8e-05	42	1	2.98e-05	42	1	4.73e-05	42	1	5.39e-05	42	1	2.63e-05	41	1	2.085e-05	42	1	1.75e-05	42	1
41.6	1	4.1e-05	41.6	1	5.15e-05	41.6	1	5e-05	42.6	1	2.23667e-05	41.6	1	3.116e-05	41.6	1	3.225e-05	41.6	1	3.49e-05	41.6	1	3.36e-05	42.6	1	2.13e-05	42.6	1	4.85e-05	42.6	1	3.025e-05	42.6	1	4.79e-05	42.6	1	5.5e-05	42.6	1	2.67e-05	41.6	1	2.125e-05	42.6	1	1.78333e-05	42.6	1
42.2	1	4.16667e-05	42.2	1	5.2e-05	42.2	1	5.01e-05	43.2	1	2.28333e-05	42.2	1	3.156e-05	42.2	1	3.275e-05	42.2	1	3.54e-05	42.2	1	3.4e-05	43.2	1	2.16e-05	43.2	1	4.91667e-05	43.2	1	3.07e-05	43.2	1	4.85e-05	43.2	1	5.6e-05	43.2	1	2.71e-05	42.2	1	2.165e-05	43.2	1	1.81667e-05	43.2	1
42.8	1	4.23333e-05	42.8	1	5.25e-05	42.8	1	5.08e-05	43.8	1	2.32667e-05	42.8	1	3.196e-05	42.8	1	3.3e-05	42.8	1	3.58e-05	42.8	1	3.43e-05	43.8	1	2.19e-05	43.8	1	4.97778e-05	43.8	1	3.115e-05	43.8	1	4.91e-05	43.8	1	5.7e-05	43.8	1	2.75e-05	42.8	1	2.2e-05	43.8	1	1.85e-05	43.8	1
43.4	1	4.3e-05	43.4	1	5.35e-05	43.4	1	5.15e-05	44.4	1	2.37333e-05	43.4	1	3.24e-05	43.4	1	3.325e-05	43.4	1	3.63e-05	43.4	1	3.46e-05	44.4	1	2.22e-05	44.4	1	5.03333e-05	44.4	1	3.165e-05	44.4	1	4.98e-05	44.4	1	5.8e-05	44.4	1	2.79e-05	43.4	1	2.245e-05	44.4	1	1.88667e-05	44.4	1
44	1	4.33333e-05	44	1	5.4e-05	44	1	5.2e-05	45	1	2.41667e-05	44	1	3.288e-05	44	1	3.375e-05	44	1	3.67e-05	44	1	3.49e-05	45	1	2.25e-05	45	1	5.08889e-05	45	1	3.21e-05	45	1	5.03e-05	45	1	5.91e-05	45	1	2.83e-05	44	1	2.285e-05	45	1	1.92e-05	45	1
44.6	1	4.36667e-05	44.6	1	5.5e-05	44.6	1	5.27e-05	45.6	1	2.46333e-05	44.6	1	3.328e-05	44.6	1	3.4e-05	44.6	1	3.72e-05	44.6	1	3.53e-05	45.6	1	2.28e-05	45.6	1	5.15e-05	45.6	1	3.26e-05	45.6	1	5.09e-05	45.6	1	6.01e-05	45.6	1	2.87e-05	44.6	1	2.32e-05	45.6	1	1.95333e-05	45.6	1
45.2	1	4.4e-05	45.2	1	5.55e-05	45.2	1	5.32e-05	46.2	1	2.51333e-05	45.2	1	3.372e-05	45.2	1	3.45e-05	45.2	1	3.76e-05	45.2	1	3.56e-05	46.2	1	2.31e-05	46.2	1	5.21667e-05	46.2	1	3.305e-05	46.2	1	5.15e-05	46.2	1	6.12e-05	46.2	1	2.91e-05	45.2	1	2.365e-05	46.2	1	1.99e-05	46.2	1
45.7	1	4.46667e-05	45.7	1	5.65e-05	45.7	1	5.4e-05	46.8	1	2.56e-05	45.7	1	3.412e-05	45.7	1	3.475e-05	45.7	1	3.81e-05	45.7	1	3.6e-05	46.8	1	2.34e-05	46.8	1	5.27778e-05	46.8	1	3.355e-05	46.8	1	5.22e-05	46.8	1	6.22e-05	46.8	1	2.95e-05	45.7	1	2.4e-05	46.8	1	2.02333e-05	46.8	1
46.3	1	4.5e-05	46.3	1	5.7e-05	46.3	1	5.45e-05	47.4	1	2.60667e-05	46.3	1	3.46e-05	46.3	1	3.5e-05	46.3	1	3.86e-05	46.3	1	3.64e-05	47.4	1	2.37e-05	47.4	1	5.33889e-05	47.4	1	3.4e-05	47.4	1	5.28e-05	47.4	1	6.33e-05	47.4	1	2.99e-05	46.3	1	2.44e-05	47.4	1	2.06e-05	47.4	1
46.9	1	4.53333e-05	46.9	1	5.8e-05	46.9	1	5.52e-05	48	1	2.65333e-05	46.9	1	3.484e-05	46.9	1	3.55e-05	46.9	1	3.9e-05	46.9	1	3.67e-05	48	1	2.4e-05	48	1	5.4e-05	48	1	3.45e-05	48	1	5.34e-05	48	1	6.43e-05	48	1	3.03e-05	46.9	1	2.48e-05	48	1	2.09333e-05	48	1
47.5	1	4.6e-05	47.5	1	5.85e-05	47.5	1	5.59e-05	48.6	1	2.7e-05	47.5	1	3.532e-05	47.5	1	3.575e-05	47.5	1	3.95e-05	47.5	1	3.71e-05	48.6	1	2.435e-05	48.6	1	5.46111e-05	48.6	1	3.495e-05	48.6	1	5.4e-05	48.6	1	6.54e-05	48.6	1	3.08e-05	47.5	1	2.505e-05	48.6	1	2.12667e-05	48.6	1
48.1	1	4.66667e-05	48.1	1	5.95e-05	48.1	1	5.65e-05	49.2	1	2.74667e-05	48.1	1	3.576e-05	48.1	1	3.625e-05	48.1	1	4e-05	48.1	1	3.73e-05	49.2	1	2.465e-05	49.2	1	5.51667e-05	49.2	1	3.545e-05	49.2	1	5.45e-05	49.2	1	6.65e-05	49.2	1	3.12e-05	48.1	1	2.545e-05	49.2	1	2.16333e-05	49.2	1
48.7	1	4.73333e-05	48.7	1	6e-05	48.7	1	5.71e-05	49.8	1	2.79333e-05	48.7	1	3.624e-05	48.7	1	3.65e-05	48.7	1	4.04e-05	48.7	1	3.76e-05	49.8	1	2.495e-05	49.8	1	5.55556e-05	49.8	1	3.595e-05	49.8	1	5.51e-05	49.8	1	6.76e-05	49.8	1	3.16e-05	48.7	1	2.59e-05	49.8	1	2.2e-05	49.8	1
49.3	1	4.76667e-05	49.3	1	6.1e-05	49.3	1	5.76e-05	50.4	1	2.84333e-05	49.3	1	3.668e-05	49.3	1	3.675e-05	49.3	1	4.09e-05	49.3	1	3.76e-05	50.4	1	2.52e-05	50.4	1	5.66667e-05	50.4	1	3.645e-05	50.4	1	5.58e-05	50.4	1	6.87e-05	50.4	1	3.21e-05	49.3	1	2.625e-05	50.4	1	2.23667e-05	50.4	1
49.9	1	4.83333e-05	49.9	1	6.15e-05	49.9	1	5.82e-05	51	1	2.89333e-05	49.9	1	3.712e-05	49.9	1	3.725e-05	49.9	1	4.14e-05	49.9	1	3.79e-05	51	1	2.55e-05	51	1	5.72222e-05	51	1	3.695e-05	51	1	5.64e-05	51	1	6.99e-05	51	1	3.25e-05	49.9	1	2.66e-05	51	1	2.27333e-05	51	1
50.5	1	4.9e-05	50.5	1	6.25e-05	50.5	1	5.87e-05	51.6	1	2.94e-05	50.5	1	3.744e-05	50.5	1	3.75e-05	50.5	1	4.19e-05	50.5	1	3.82e-05	51.6	1	2.585e-05	51.6	1	5.77778e-05	51.6	1	3.745e-05	51.6	1	5.7e-05	51.6	1	7.1e-05	51.6	1	3.29e-05	50.5	1	2.71e-05	51.6	1	2.31e-05	51.6	1
51.1	1	4.93333e-05	51.1	1	6.3e-05	51.1	1	5.92e-05	52.2	1	2.99e-05	51.1	1	3.784e-05	51.1	1	3.8e-05	51.1	1	4.23e-05	51.1	1	3.86e-05	52.2	1	2.615e-05	52.2	1	5.83333e-05	52.2	1	3.79e-05	52.2	1	5.76e-05	52.2	1	7.21e-05	52.2	1	3.33e-05	51.1	1	2.755e-05	52.2	1	2.34667e-05	52.2	1
51.7	1	5e-05	51.7	1	6.4e-05	51.7	1	5.99e-05	52.8	1	3.04e-05	51.7	1	3.836e-05	51.7	1	3.825e-05	51.7	1	4.28e-05	51.7	1	3.89e-05	52.8	1	2.645e-05	52.8	1	5.88889e-05	52.8	1	3.845e-05	52.8	1	5.83e-05	52.8	1	7.32e-05	52.8	1	3.37e-05	51.7	1	2.8e-05	52.8	1	2.38e-05	52.8	1
52.3	1	5.03333e-05	52.3	1	6.45e-05	52.3	1	6.04e-05	53.4	1	3.08667e-05	52.3	1	3.876e-05	52.3	1	3.85e-05	52.3	1	4.33e-05	52.3	1	3.92e-05	53.4	1	2.68e-05	53.4	1	5.94444e-05	53.4	1	3.895e-05	53.4	1	5.89e-05	53.4	1	7.43e-05	53.4	1	3.42e-05	52.3	1	2.835e-05	53.4	1	2.41667e-05	53.4	1
52.9	1	5.1e-05	52.9	1	6.55e-05	52.9	1	6.11e-05	54	1	3.13667e-05	52.9	1	3.912e-05	52.9	1	3.9e-05	52.9	1	4.38e-05	52.9	1	3.95e-05	54	1	2.71e-05	54	1	6e-05	54	1	3.945e-05	54	1	5.95e-05	54	1	7.54e-05	54	1	3.46e-05	52.9	1	2.885e-05	54	1	2.45667e-05	54	1
53.5	1	5.16667e-05	53.5	1	6.6e-05	53.5	1	6.19e-05	54.6	1	3.18667e-05	53.5	1	3.956e-05	53.5	1	3.925e-05	53.5	1	4.43e-05	53.5	1	3.99e-05	54.6	1	2.745e-05	54.6	1	6.05556e-05	54.6	1	3.995e-05	54.6	1	6.01e-05	54.6	1	7.66e-05	54.6	1	3.51e-05	53.5	1	2.92e-05	54.6	1	2.49333e-05	54.6	1
54.1	1	5.23333e-05	54.1	1	6.7e-05	54.1	1	6.25e-05	55.2	1	3.23333e-05	54.1	1	3.992e-05	54.1	1	3.975e-05	54.1	1	4.48e-05	54.1	1	4.02e-05	55.2	1	2.775e-05	55.2	1	6.11111e-05	55.2	1	4.045e-05	55.2	1	6.07e-05	55.2	1	7.77e-05	55.2	1	3.55e-05	54.1	1	2.965e-05	55.2	1	2.53e-05	55.2	1
54.7	1	5.26667e-05	54.7	1	6.75e-05	54.7	1	6.3e-05	55.8	1	3.28333e-05	54.7	1	4.04e-05	54.7	1	4e-05	54.7	1	4.53e-05	54.7	1	4.08e-05	55.8	1	2.81e-05	55.8	1	6.16667e-05	55.8	1	4.095e-05	55.8	1	6.13e-05	55.8	1	7.89e-05	55.8	1	3.59e-05	54.7	1	3.015e-05	55.8	1	2.56667e-05	55.8	1
55.2	1	5.3e-05	55.2	1	6.85e-05	55.2	1	6.38e-05	56.4	1	3.33333e-05	55.2	1	4.08e-05	55.2	1	4.025e-05	55.2	1	4.57e-05	55.2	1	4.12e-05	56.4	1	2.84e-05	56.4	1	6.27778e-05	56.4	1	4.145e-05	56.4	1	6.19e-05	56.4	1	8e-05	56.4	1	3.64e-05	55.2	1	3.06e-05	56.4	1	2.60667e-05	56.4	1
55.8	1	5.36667e-05	55.8	1	6.9e-05	55.8	1	6.45e-05	57	1	3.4e-05	55.8	1	4.12e-05	55.8	1	4.075e-05	55.8	1	4.62e-05	55.8	1	4.16e-05	57	1	2.875e-05	57	1	6.33333e-05	57	1	4.2e-05	57	1	6.25e-05	57	1	8.11e-05	57	1	3.68e-05	55.8	1	3.105e-05	57	1	2.64333e-05	57	1
56.4	1	5.4e-05	56.4	1	7e-05	56.4	1	6.51e-05	57.6	1	3.43333e-05	56.4	1	4.2e-05	56.4	1	4.1e-05	56.4	1	4.67e-05	56.4	1	4.2e-05	57.6	1	2.905e-05	57.6	1	6.38889e-05	57.6	1	4.25e-05	57.6	1	6.31e-05	57.6	1	8.23e-05	57.6	1	3.73e-05	56.4	1	3.155e-05	57.6	1	2.68e-05	57.6	1
57	1	5.46667e-05	57	1	7.05e-05	57	1	6.59e-05	58.2	1	3.5e-05	57	1	4.2e-05	57	1	4.125e-05	57	1	4.72e-05	57	1	4.23e-05	58.2	1	2.94e-05	58.2	1	6.44444e-05	58.2	1	4.305e-05	58.2	1	6.37e-05	58.2	1	8.35e-05	58.2	1	3.77e-05	57	1	3.185e-05	58.2	1	2.72e-05	58.2	1
57.6	1	5.53333e-05	57.6	1	7.15e-05	57.6	1	6.61e-05	58.8	1	3.53333e-05	57.6	1	4.24e-05	57.6	1	4.175e-05	57.6	1	4.77e-05	57.6	1	4.27e-05	58.8	1	2.97e-05	58.8	1	6.5e-05	58.8	1	4.355e-05	58.8	1	6.43e-05	58.8	1	8.47e-05	58.8	1	3.82e-05	57.6	1	3.225e-05	58.8	1	2.76e-05	58.8	1
58.2	1	5.56667e-05	58.2	1	7.2e-05	58.2	1	6.69e-05	59.4	1	3.6e-05	58.2	1	4.28e-05	58.2	1	4.2e-05	58.2	1	4.82e-05	58.2	1	4.31e-05	59.4	1	3.005e-05	59.4	1	6.55556e-05	59.4	1	4.405e-05	59.4	1	6.49e-05	59.4	1	8.59e-05	59.4	1	3.86e-05	58.2	1	3.27e-05	59.4	1	2.79667e-05	59.4	1
58.8	1	5.63333e-05	58.8	1	7.3e-05	58.8	1	6.76e-05	60	1	3.66667e-05	58.8	1	4.32e-05	58.8	1	4.25e-05	58.8	1	4.87e-05	58.8	1	4.32e-05	60	1	3.04e-05	60	1	6.61111e-05	60	1	4.455e-05	60	1	6.55e-05	60	1	8.7e-05	60	1	3.9e-05	58.8	1	3.315e-05	60	1	2.83667e-05	60	1
59.4	1	5.7e-05	59.4	1	7.35e-05	59.4	1	6.82e-05	60	1	3.63333e-05	59.4	1	4.36e-05	59.4	1	4.275e-05	59.4	1	4.92e-05	59.4	1	4.35e-05	60	1	3.035e-05	60	1	6.61111e-05	60	1	4.455e-05	60	1	6.55e-05	60	1	8.7e-05	60	1	3.9e-05	59.4	1	3.355e-05	60	1	2.83333e-05	60	1
60	1	5.73333e-05	60	1	7.45e-05	60	1	6.88e-05	59.4	1	3.6e-05	60	1	4.4e-05	60	1	4.3e-05	60	1	4.97e-05	60	1	4.4e-05	59.4	1	3e-05	59.4	1	6.55556e-05	59.4	1	4.405e-05	59.4	1	6.49e-05	59.4	1	8.57e-05	59.4	1	3.85e-05	60	1	3.405e-05	59.4	1	2.79e-05	59.4	1
60	1	5.73333e-05	60	1	7.45e-05	60	1	6.88e-05	58.8	1	3.53333e-05	60	1	4.44e-05	60	1	4.3e-05	60	1	4.97e-05	60	1	4.38e-05	58.8	1	2.97e-05	58.8	1	6.44444e-05	58.8	1	4.35e-05	58.8	1	6.43e-05	58.8	1	8.43e-05	58.8	1	3.79e-05	60	1	3.4e-05	58.8	1	2.74667e-05	58.8	1
59.4	1	5.66667e-05	59.4	1	7.35e-05	59.4	1	6.83e-05	58.2	1	3.46667e-05	59.4	1	4.4e-05	59.4	1	4.275e-05	59.4	1	4.92e-05	59.4	1	4.34e-05	58.2	1	2.935e-05	58.2	1	6.38889e-05	58.2	1	4.295e-05	58.2	1	6.37e-05	58.2	1	8.31e-05	58.2	1	3.73e-05	59.4	1	3.34e-05	58.2	1	2.70333e-05	58.2	1
58.8	1	5.6e-05	58.8	1	7.3e-05	58.8	1	6.76e-05	57.6	1	3.4e-05	58.8	1	4.36e-05	58.8	1	4.225e-05	58.8	1	4.87e-05	58.8	1	4.3e-05	57.6	1	2.9e-05	57.6	1	6.33333e-05	57.6	1	4.245e-05	57.6	1	6.3e-05	57.6	1	8.18e-05	57.6	1	3.68e-05	58.8	1	3.285e-05	57.6	1	2.66333e-05	57.6	1
58.2	1	5.53333e-05	58.2	1	7.2e-05	58.2	1	6.66e-05	57	1	3.36667e-05	58.2	1	4.32e-05	58.2	1	4.2e-05	58.2	1	4.81e-05	58.2	1	4.27e-05	57	1	2.865e-05	57	1	6.27778e-05	57	1	4.195e-05	57	1	6.25e-05	57	1	8.06e-05	57	1	3.63e-05	58.2	1	3.24e-05	57	1	2.62e-05	57	1
57.6	1	5.46667e-05	57.6	1	7.1e-05	57.6	1	6.59e-05	56.4	1	3.29667e-05	57.6	1	4.28e-05	57.6	1	4.15e-05	57.6	1	4.76e-05	57.6	1	4.23e-05	56.4	1	2.83e-05	56.4	1	6.22222e-05	56.4	1	4.14e-05	56.4	1	6.18e-05	56.4	1	7.93e-05	56.4	1	3.58e-05	57.6	1	3.19e-05	56.4	1	2.57667e-05	56.4	1
57	1	5.4e-05	57	1	7.05e-05	57	1	6.53e-05	55.8	1	3.24e-05	57	1	4.24e-05	57	1	4.125e-05	57	1	4.71e-05	57	1	4.18e-05	55.8	1	2.8e-05	55.8	1	6.11111e-05	55.8	1	4.09e-05	55.8	1	6.13e-05	55.8	1	7.81e-05	55.8	1	3.53e-05	57	1	3.135e-05	55.8	1	2.53667e-05	55.8	1
56.4	1	5.36667e-05	56.4	1	7e-05	56.4	1	6.46e-05	55.2	1	3.18333e-05	56.4	1	4.2e-05	56.4	1	4.1e-05	56.4	1	4.66e-05	56.4	1	4.14e-05	55.2	1	2.765e-05	55.2	1	6.05556e-05	55.2	1	4.04e-05	55.2	1	6.07e-05	55.2	1	7.68e-05	55.2	1	3.48e-05	56.4	1	3.085e-05	55.2	1	2.49667e-05	55.2	1
55.8	1	5.3e-05	55.8	1	6.9e-05	55.8	1	6.39e-05	54.6	1	3.13e-05	55.8	1	4.16e-05	55.8	1	4.05e-05	55.8	1	4.61e-05	55.8	1	4.1e-05	54.6	1	2.735e-05	54.6	1	6e-05	54.6	1	3.985e-05	54.6	1	6e-05	54.6	1	7.56e-05	54.6	1	3.42e-05	55.8	1	3.035e-05	54.6	1	2.45667e-05	54.6	1
55.2	1	5.23333e-05	55.2	1	6.8e-05	55.2	1	6.32e-05	54	1	3.07333e-05	55.2	1	4.12e-05	55.2	1	4.025e-05	55.2	1	4.56e-05	55.2	1	4.06e-05	54	1	2.7e-05	54	1	5.88889e-05	54	1	3.935e-05	54	1	5.94e-05	54	1	7.44e-05	54	1	3.37e-05	55.2	1	2.99e-05	54	1	2.41333e-05	54	1
54.7	1	5.16667e-05	54.7	1	6.75e-05	54.7	1	6.26e-05	53.4	1	3.02e-05	54.7	1	4.12e-05	54.7	1	3.975e-05	54.7	1	4.51e-05	54.7	1	4.02e-05	53.4	1	2.665e-05	53.4	1	5.83333e-05	53.4	1	3.885e-05	53.4	1	5.88e-05	53.4	1	7.32e-05	53.4	1	3.32e-05	54.7	1	2.945e-05	53.4	1	2.37667e-05	53.4	1
54.1	1	5.1e-05	54.1	1	6.65e-05	54.1	1	6.2e-05	52.8	1	2.97e-05	54.1	1	4.08e-05	54.1	1	3.95e-05	54.1	1	4.46e-05	54.1	1	3.99e-05	52.8	1	2.635e-05	52.8	1	5.77778e-05	52.8	1	3.835e-05	52.8	1	5.81e-05	52.8	1	7.2e-05	52.8	1	3.27e-05	54.1	1	2.895e-05	52.8	1	2.33667e-05	52.8	1
53.5	1	5.03333e-05	53.5	1	6.6e-05	53.5	1	6.13e-05	52.2	1	2.91667e-05	53.5	1	4.04e-05	53.5	1	3.9e-05	53.5	1	4.41e-05	53.5	1	3.95e-05	52.2	1	2.6e-05	52.2	1	5.72222e-05	52.2	1	3.785e-05	52.2	1	5.75e-05	52.2	1	7.08e-05	52.2	1	3.22e-05	53.5	1	2.85e-05	52.2	1	2.29667e-05	52.2	1
52.9	1	4.96667e-05	52.9	1	6.5e-05	52.9	1	6.07e-05	51.6	1	2.86333e-05	52.9	1	3.98e-05	52.9	1	3.875e-05	52.9	1	4.36e-05	52.9	1	3.91e-05	51.6	1	2.57e-05	51.6	1	5.61111e-05	51.6	1	3.735e-05	51.6	1	5.69e-05	51.6	1	6.97e-05	51.6	1	3.18e-05	52.9	1	2.795e-05	51.6	1	2.26e-05	51.6	1
52.3	1	4.9e-05	52.3	1	6.45e-05	52.3	1	6e-05	51	1	2.81333e-05	52.3	1	3.92e-05	52.3	1	3.825e-05	52.3	1	4.31e-05	52.3	1	3.87e-05	51	1	2.535e-05	51	1	5.55556e-05	51	1	3.685e-05	51	1	5.63e-05	51	1	6.85e-05	51	1	3.13e-05	52.3	1	2.75e-05	51	1	2.22e-05	51	1
51.7	1	4.83333e-05	51.7	1	6.35e-05	51.7	1	5.93e-05	50.4	1	2.76e-05	51.7	1	3.876e-05	51.7	1	3.8e-05	51.7	1	4.26e-05	51.7	1	3.84e-05	50.4	1	2.505e-05	50.4	1	5.48889e-05	50.4	1	3.635e-05	50.4	1	5.57e-05	50.4	1	6.73e-05	50.4	1	3.08e-05	51.7	1	2.695e-05	50.4	1	2.18e-05	50.4	1
51.1	1	4.8e-05	51.1	1	6.3e-05	51.1	1	5.85e-05	49.8	1	2.71e-05	51.1	1	3.824e-05	51.1	1	3.775e-05	51.1	1	4.21e-05	51.1	1	3.8e-05	49.8	1	2.475e-05	49.8	1	5.42778e-05	49.8	1	3.59e-05	49.8	1	5.51e-05	49.8	1	6.62e-05	49.8	1	3.04e-05	51.1	1	2.65e-05	49.8	1	2.14333e-05	49.8	1
50.5	1	4.73333e-05	50.5	1	6.2e-05	50.5	1	5.79e-05	49.2	1	2.66e-05	50.5	1	3.772e-05	50.5	1	3.725e-05	50.5	1	4.16e-05	50.5	1	3.76e-05	49.2	1	2.44e-05	49.2	1	5.36111e-05	49.2	1	3.54e-05	49.2	1	5.44e-05	49.2	1	6.5e-05	49.2	1	2.99e-05	50.5	1	2.6e-05	49.2	1	2.10667e-05	49.2	1
49.9	1	4.66667e-05	49.9	1	6.15e-05	49.9	1	5.74e-05	48.6	1	2.60667e-05	49.9	1	3.724e-05	49.9	1	3.7e-05	49.9	1	4.12e-05	49.9	1	3.71e-05	48.6	1	2.41e-05	48.6	1	5.29444e-05	48.6	1	3.49e-05	48.6	1	5.38e-05	48.6	1	6.39e-05	48.6	1	2.94e-05	49.9	1	2.56e-05	48.6	1	2.06667e-05	48.6	1
49.3	1	4.6e-05	49.3	1	6.05e-05	49.3	1	5.66e-05	48	1	2.55333e-05	49.3	1	3.672e-05	49.3	1	3.65e-05	49.3	1	4.07e-05	49.3	1	3.67e-05	48	1	2.38e-05	48	1	5.22778e-05	48	1	3.445e-05	48	1	5.32e-05	48	1	6.28e-05	48	1	2.89e-05	49.3	1	2.51e-05	48	1	2.03e-05	48	1
48.7	1	4.56667e-05	48.7	1	6e-05	48.7	1	5.59e-05	47.4	1	2.50667e-05	48.7	1	3.628e-05	48.7	1	3.625e-05	48.7	1	4.02e-05	48.7	1	3.64e-05	47.4	1	2.345e-05	47.4	1	5.16667e-05	47.4	1	3.395e-05	47.4	1	5.26e-05	47.4	1	6.17e-05	47.4	1	2.85e-05	48.7	1	2.46e-05	47.4	1	1.99333e-05	47.4	1
48.1	1	4.5e-05	48.1	1	5.9e-05	48.1	1	5.52e-05	46.8	1	2.45667e-05	48.1	1	3.572e-05	48.1	1	3.575e-05	48.1	1	3.97e-05	48.1	1	3.61e-05	46.8	1	2.315e-05	46.8	1	5.10556e-05	46.8	1	3.345e-05	46.8	1	5.2e-05	46.8	1	6.05e-05	46.8	1	2.8e-05	48.1	1	2.415e-05	46.8	1	1.95667e-05	46.8	1
47.5	1	4.43333e-05	47.5	1	5.85e-05	47.5	1	5.45e-05	46.2	1	2.41e-05	47.5	1	3.516e-05	47.5	1	3.55e-05	47.5	1	3.92e-05	47.5	1	3.56e-05	46.2	1	2.285e-05	46.2	1	5.03333e-05	46.2	1	3.3e-05	46.2	1	5.13e-05	46.2	1	5.94e-05	46.2	1	2.76e-05	47.5	1	2.375e-05	46.2	1	1.92e-05	46.2	1
46.9	1	4.36667e-05	46.9	1	5.75e-05	46.9	1	5.39e-05	45.6	1	2.36e-05	46.9	1	3.472e-05	46.9	1	3.5e-05	46.9	1	3.88e-05	46.9	1	3.53e-05	45.6	1	2.255e-05	45.6	1	4.97222e-05	45.6	1	3.255e-05	45.6	1	5.07e-05	45.6	1	5.83e-05	45.6	1	2.71e-05	46.9	1	2.335e-05	45.6	1	1.88333e-05	45.6	1
46.3	1	4.3e-05	46.3	1	5.7e-05	46.3	1	5.32e-05	45	1	2.31e-05	46.3	1	3.428e-05	46.3	1	3.475e-05	46.3	1	3.83e-05	46.3	1	3.49e-05	45	1	2.225e-05	45	1	4.90556e-05	45	1	3.205e-05	45	1	5.01e-05	45	1	5.72e-05	45	1	2.67e-05	46.3	1	2.28e-05	45	1	1.85e-05	45	1
45.7	1	4.26667e-05	45.7	1	5.6e-05	45.7	1	5.25e-05	44.4	1	2.26667e-05	45.7	1	3.38e-05	45.7	1	3.45e-05	45.7	1	3.78e-05	45.7	1	3.45e-05	44.4	1	2.195e-05	44.4	1	4.84444e-05	44.4	1	3.155e-05	44.4	1	4.96e-05	44.4	1	5.62e-05	44.4	1	2.62e-05	45.7	1	2.235e-05	44.4	1	1.81333e-05	44.4	1
45.2	1	4.2e-05	45.2	1	5.55e-05	45.2	1	5.19e-05	43.8	1	2.21667e-05	45.2	1	3.332e-05	45.2	1	3.4e-05	45.2	1	3.74e-05	45.2	1	3.4e-05	43.8	1	2.165e-05	43.8	1	4.77778e-05	43.8	1	3.11e-05	43.8	1	4.89e-05	43.8	1	5.51e-05	43.8	1	2.58e-05	45.2	1	2.19e-05	43.8	1	1.77667e-05	43.8	1
44.6	1	4.13333e-05	44.6	1	5.45e-05	44.6	1	5.13e-05	43.2	1	2.17e-05	44.6	1	3.288e-05	44.6	1	3.375e-05	44.6	1	3.69e-05	44.6	1	3.37e-05	43.2	1	2.135e-05	43.2	1	4.71667e-05	43.2	1	3.065e-05	43.2	1	4.83e-05	43.2	1	5.41e-05	43.2	1	2.54e-05	44.6	1	2.15e-05	43.2	1	1.74333e-05	43.2	1
44	1	4.1e-05	44	1	5.4e-05	44	1	5.06e-05	42.6	1	2.12667e-05	44	1	3.24e-05	44	1	3.325e-05	44	1	3.64e-05	44	1	3.33e-05	42.6	1	2.105e-05	42.6	1	4.66111e-05	42.6	1	3.02e-05	42.6	1	4.77e-05	42.6	1	5.3e-05	42.6	1	2.5e-05	44	1	2.105e-05	42.6	1	1.71e-05	42.6	1
43.4	1	4.03333e-05	43.4	1	5.3e-05	43.4	1	5e-05	42	1	2.07667e-05	43.4	1	3.192e-05	43.4	1	3.3e-05	43.4	1	3.6e-05	43.4	1	3.3e-05	42	1	2.075e-05	42	1	4.59444e-05	42	1	2.97e-05	42	1	4.71e-05	42	1	5.19e-05	42	1	2.45e-05	43.4	1	2.06e-05	42	1	1.67333e-05	42	1
42.8	1	3.96667e-05	42.8	1	5.25e-05	42.8	1	4.93e-05	41.4	1	2.03333e-05	42.8	1	3.148e-05	42.8	1	3.25e-05	42.8	1	3.55e-05	42.8	1	3.27e-05	41.4	1	2.045e-05	41.4	1	4.53889e-05	41.4	1	2.925e-05	41.4	1	4.65e-05	41.4	1	5.09e-05	41.4	1	2.41e-05	42.8	1	2.02e-05	41.4	1	1.64e-05	41.4	1
42.2	1	3.9e-05	42.2	1	5.2e-05	42.2	1	4.86e-05	40.8	1	1.99e-05	42.2	1	3.1e-05	42.2	1	3.225e-05	42.2	1	3.5e-05	42.2	1	3.23e-05	40.8	1	2.015e-05	40.8	1	4.47222e-05	40.8	1	2.88e-05	40.8	1	4.59e-05	40.8	1	4.99e-05	40.8	1	2.37e-05	42.2	1	1.975e-05	40.8	1	1.60667e-05	40.8	1
41.6	1	3.83333e-05	41.6	1	5.1e-05	41.6	1	4.8e-05	40.2	1	1.94333e-05	41.6	1	3.056e-05	41.6	1	3.175e-05	41.6	1	3.46e-05	41.6	1	3.19e-05	40.2	1	1.99e-05	40.2	1	4.41111e-05	40.2	1	2.835e-05	40.2	1	4.53e-05	40.2	1	4.88e-05	40.2	1	2.33e-05	41.6	1	1.935e-05	40.2	1	1.57333e-05	40.2	1
41	1	3.76667e-05	41	1	5.05e-05	41	1	4.74e-05	39.6	1	1.9e-05	41	1	3.012e-05	41	1	3.15e-05	41	1	3.41e-05	41	1	3.15e-05	39.6	1	1.96e-05	39.6	1	4.35e-05	39.6	1	2.79e-05	39.6	1	4.46e-05	39.6	1	4.78e-05	39.6	1	2.29e-05	41	1	1.89e-05	39.6	1	1.54e-05	39.6	1
40.4	1	3.73333e-05	40.4	1	4.955e-05	40.4	1	4.67e-05	39	1	1.86e-05	40.4	1	2.964e-05	40.4	1	3.1e-05	40.4	1	3.37e-05	40.4	1	3.12e-05	39	1	1.935e-05	39	1	4.28889e-05	39	1	2.745e-05	39	1	4.4e-05	39	1	4.68e-05	39	1	2.25e-05	40.4	1	1.855e-05	39	1	1.50667e-05	39	1
39.8	1	3.66667e-05	39.8	1	4.885e-05	39.8	1	4.62e-05	38.4	1	1.81667e-05	39.8	1	2.924e-05	39.8	1	3.075e-05	39.8	1	3.32e-05	39.8	1	3.07e-05	38.4	1	1.905e-05	38.4	1	4.22222e-05	38.4	1	2.7e-05	38.4	1	4.35e-05	38.4	1	4.59e-05	38.4	1	2.21e-05	39.8	1	1.815e-05	38.4	1	1.47667e-05	38.4	1
39.2	1	3.6e-05	39.2	1	4.81e-05	39.2	1	4.56e-05	37.8	1	1.77333e-05	39.2	1	2.884e-05	39.2	1	3.025e-05	39.2	1	3.28e-05	39.2	1	3.03e-05	37.8	1	1.875e-05	37.8	1	4.16667e-05	37.8	1	2.655e-05	37.8	1	4.28e-05	37.8	1	4.49e-05	37.8	1	2.17e-05	39.2	1	1.77e-05	37.8	1	1.44333e-05	37.8	1
38.6	1	3.56667e-05	38.6	1	4.74e-05	38.6	1	4.49e-05	37.2	1	1.73e-05	38.6	1	2.828e-05	38.6	1	3e-05	38.6	1	3.24e-05	38.6	1	3e-05	37.2	1	1.85e-05	37.2	1	4.10556e-05	37.2	1	2.61e-05	37.2	1	4.22e-05	37.2	1	4.39e-05	37.2	1	2.13e-05	38.6	1	1.725e-05	37.2	1	1.41e-05	37.2	1
38	1	3.5e-05	38	1	4.67e-05	38	1	4.44e-05	36.6	1	1.69e-05	38	1	2.788e-05	38	1	2.95e-05	38	1	3.19e-05	38	1	2.97e-05	36.6	1	1.82e-05	36.6	1	4.03889e-05	36.6	1	2.57e-05	36.6	1	4.16e-05	36.6	1	4.29e-05	36.6	1	2.09e-05	38	1	1.685e-05	36.6	1	1.38e-05	36.6	1
37.4	1	3.43333e-05	37.4	1	4.6e-05	37.4	1	4.37e-05	36	1	1.65e-05	37.4	1	2.748e-05	37.4	1	2.925e-05	37.4	1	3.15e-05	37.4	1	2.93e-05	36	1	1.795e-05	36	1	3.98333e-05	36	1	2.525e-05	36	1	4.1e-05	36	1	4.2e-05	36	1	2.05e-05	37.4	1	1.645e-05	36	1	1.34667e-05	36	1
36.8	1	3.4e-05	36.8	1	4.53e-05	36.8	1	4.3e-05	35.4	1	1.60667e-05	36.8	1	2.704e-05	36.8	1	2.875e-05	36.8	1	3.1e-05	36.8	1	2.89e-05	35.4	1	1.765e-05	35.4	1	3.92222e-05	35.4	1	2.48e-05	35.4	1	4.04e-05	35.4	1	4.11e-05	35.4	1	2.01e-05	36.8	1	1.61e-05	35.4	1	1.32e-05	35.4	1
36.2	1	3.33333e-05	36.2	1	4.46e-05	36.2	1	4.25e-05	34.8	1	1.56667e-05	36.2	1	2.656e-05	36.2	1	2.85e-05	36.2	1	3.06e-05	36.2	1	2.85e-05	34.8	1	1.74e-05	34.8	1	3.86667e-05	34.8	1	2.44e-05	34.8	1	3.99e-05	34.8	1	4.01e-05	34.8	1	1.97e-05	36.2	1	1.57e-05	34.8	1	1.29e-05	34.8	1
35.6	1	3.28333e-05	35.6	1	4.39e-05	35.6	1	4.18e-05	34.2	1	1.52667e-05	35.6	1	2.612e-05	35.6	1	2.825e-05	35.6	1	3.02e-05	35.6	1	2.82e-05	34.2	1	1.71e-05	34.2	1	3.80556e-05	34.2	1	2.4e-05	34.2	1	3.93e-05	34.2	1	3.93e-05	34.2	1	1.94e-05	35.6	1	1.53e-05	34.2	1	1.25667e-05	34.2	1
35.1	1	3.23e-05	35.1	1	4.32e-05	35.1	1	4.12e-05	33.6	1	1.48667e-05	35.1	1	2.572e-05	35.1	1	2.775e-05	35.1	1	2.97e-05	35.1	1	2.79e-05	33.6	1	1.685e-05	33.6	1	3.75e-05	33.6	1	2.355e-05	33.6	1	3.87e-05	33.6	1	3.84e-05	33.6	1	1.9e-05	35.1	1	1.495e-05	33.6	1	1.23e-05	33.6	1
34.5	1	3.17e-05	34.5	1	4.25e-05	34.5	1	4.07e-05	33	1	1.45e-05	34.5	1	2.524e-05	34.5	1	2.75e-05	34.5	1	2.93e-05	34.5	1	2.76e-05	33	1	1.655e-05	33	1	3.68333e-05	33	1	2.315e-05	33	1	3.81e-05	33	1	3.75e-05	33	1	1.86e-05	34.5	1	1.455e-05	33	1	1.19667e-05	33	1
33.9	1	3.11667e-05	33.9	1	4.18e-05	33.9	1	4.01e-05	32.4	1	1.41333e-05	33.9	1	2.488e-05	33.9	1	2.7e-05	33.9	1	2.89e-05	33.9	1	2.71e-05	32.4	1	1.63e-05	32.4	1	3.63333e-05	32.4	1	2.27e-05	32.4	1	3.75e-05	32.4	1	3.66e-05	32.4	1	1.82e-05	33.9	1	1.415e-05	32.4	1	1.17e-05	32.4	1
33.3	1	3.06667e-05	33.3	1	4.11e-05	33.3	1	3.95e-05	31.8	1	1.37333e-05	33.3	1	2.444e-05	33.3	1	2.675e-05	33.3	1	2.85e-05	33.3	1	2.67e-05	31.8	1	1.605e-05	31.8	1	3.57222e-05	31.8	1	2.23e-05	31.8	1	3.69e-05	31.8	1	3.57e-05	31.8	1	1.79e-05	33.3	1	1.38e-05	31.8	1	1.14e-05	31.8	1
32.7	1	3.01333e-05	32.7	1	4.04e-05	32.7	1	3.89e-05	31.2	1	1.34e-05	32.7	1	2.4e-05	32.7	1	2.625e-05	32.7	1	2.8e-05	32.7	1	2.64e-05	31.2	1	1.58e-05	31.2	1	3.51667e-05	31.2	1	2.19e-05	31.2	1	3.63e-05	31.2	1	3.48e-05	31.2	1	1.75e-05	32.7	1	1.34e-05	31.2	1	1.11333e-05	31.2	1
32.1	1	2.96333e-05	32.1	1	3.975e-05	32.1	1	3.84e-05	30.6	1	1.30667e-05	32.1	1	2.36e-05	32.1	1	2.6e-05	32.1	1	2.76e-05	32.1	1	2.62e-05	30.6	1	1.55e-05	30.6	1	3.46667e-05	30.6	1	2.15e-05	30.6	1	3.57e-05	30.6	1	3.39e-05	30.6	1	1.72e-05	32.1	1	1.305e-05	30.6	1	1.08333e-05	30.6	1
31.5	1	2.90667e-05	31.5	1	3.905e-05	31.5	1	3.77e-05	30	1	1.27e-05	31.5	1	2.308e-05	31.5	1	2.55e-05	31.5	1	2.72e-05	31.5	1	2.58e-05	30	1	1.525e-05	30	1	3.40556e-05	30	1	2.11e-05	30	1	3.51e-05	30	1	3.31e-05	30	1	1.68e-05	31.5	1	1.27e-05	30	1	1.05667e-05	30	1
30.9	1	2.85333e-05	30.9	1	3.835e-05	30.9	1	3.71e-05	29.4	1	1.23333e-05	30.9	1	2.272e-05	30.9	1	2.525e-05	30.9	1	2.68e-05	30.9	1	2.54e-05	29.4	1	1.5e-05	29.4	1	3.35e-05	29.4	1	2.065e-05	29.4	1	3.45e-05	29.4	1	3.22e-05	29.4	1	1.65e-05	30.9	1	1.23e-05	29.4	1	1.03e-05	29.4	1
30.3	1	2.8e-05	30.3	1	3.77e-05	30.3	1	3.66e-05	28.8	1	1.2e-05	30.3	1	2.232e-05	30.3	1	2.4825e-05	30.3	1	2.64e-05	30.3	1	2.49e-05	28.8	1	1.475e-05	28.8	1	3.3e-05	28.8	1	2.03e-05	28.8	1	3.4e-05	28.8	1	3.14e-05	28.8	1	1.61e-05	30.3	1	1.195e-05	28.8	1	1.00333e-05	28.8	1
29.7	1	2.75e-05	29.7	1	3.705e-05	29.7	1	3.6e-05	28.2	1	1.16333e-05	29.7	1	2.192e-05	29.7	1	2.445e-05	29.7	1	2.6e-05	29.7	1	2.47e-05	28.2	1	1.45e-05	28.2	1	3.25e-05	28.2	1	1.995e-05	28.2	1	3.34e-05	28.2	1	3.06e-05	28.2	1	1.58e-05	29.7	1	1.16e-05	28.2	1	9.76667e-06	28.2	1
29.1	1	2.69333e-05	29.1	1	3.635e-05	29.1	1	3.54e-05	27.6	1	1.13e-05	29.1	1	2.144e-05	29.1	1	2.4075e-05	29.1	1	2.56e-05	29.1	1	2.44e-05	27.6	1	1.425e-05	27.6	1	3.18889e-05	27.6	1	1.955e-05	27.6	1	3.28e-05	27.6	1	2.98e-05	27.6	1	1.55e-05	29.1	1	1.125e-05	27.6	1	9.46667e-06	27.6	1
28.5	1	2.64333e-05	28.5	1	3.57e-05	28.5	1	3.48e-05	27	1	1.09667e-05	28.5	1	2.108e-05	28.5	1	2.3725e-05	28.5	1	2.52e-05	28.5	1	2.4e-05	27	1	1.4e-05	27	1	3.13889e-05	27	1	1.915e-05	27	1	3.22e-05	27	1	2.89e-05	27	1	1.51e-05	28.5	1	1.09e-05	27	1	9.23333e-06	27	1
27.9	1	2.59333e-05	27.9	1	3.505e-05	27.9	1	3.43e-05	26.4	1	1.06667e-05	27.9	1	2.08e-05	27.9	1	2.3325e-05	27.9	1	2.48e-05	27.9	1	2.37e-05	26.4	1	1.375e-05	26.4	1	3.08333e-05	26.4	1	1.875e-05	26.4	1	3.16e-05	26.4	1	2.81e-05	26.4	1	1.48e-05	27.9	1	1.055e-05	26.4	1	8.96667e-06	26.4	1
27.3	1	2.54333e-05	27.3	1	3.44e-05	27.3	1	3.37e-05	25.8	1	1.03333e-05	27.3	1	2.028e-05	27.3	1	2.2975e-05	27.3	1	2.44e-05	27.3	1	2.33e-05	25.8	1	1.35e-05	25.8	1	3.02778e-05	25.8	1	1.84e-05	25.8	1	3.1e-05	25.8	1	2.74e-05	25.8	1	1.44e-05	27.3	1	1.025e-05	25.8	1	8.7e-06	25.8	1
26.7	1	2.49667e-05	26.7	1	3.375e-05	26.7	1	3.32e-05	25.2	1	1e-05	26.7	1	1.988e-05	26.7	1	2.2625e-05	26.7	1	2.4e-05	26.7	1	2.29e-05	25.2	1	1.325e-05	25.2	1	2.97222e-05	25.2	1	1.8e-05	25.2	1	3.05e-05	25.2	1	2.66e-05	25.2	1	1.41e-05	26.7	1	9.95e-06	25.2	1	8.46667e-06	25.2	1
26.1	1	2.44e-05	26.1	1	3.305e-05	26.1	1	3.26e-05	24.6	1	9.66667e-06	26.1	1	1.96e-05	26.1	1	2.225e-05	26.1	1	2.36e-05	26.1	1	2.26e-05	24.6	1	1.3e-05	24.6	1	2.91667e-05	24.6	1	1.765e-05	24.6	1	2.99e-05	24.6	1	2.59e-05	24.6	1	1.38e-05	26.1	1	9.6e-06	24.6	1	8.2e-06	24.6	1
25.5	1	2.39e-05	25.5	1	3.245e-05	25.5	1	3.2e-05	24	1	9.36667e-06	25.5	1	1.916e-05	25.5	1	2.1875e-05	25.5	1	2.32e-05	25.5	1	2.23e-05	24	1	1.275e-05	24	1	2.86667e-05	24	1	1.725e-05	24	1	2.93e-05	24	1	2.51e-05	24	1	1.35e-05	25.5	1	9.3e-06	24	1	7.96667e-06	24	1
25	1	2.34e-05	25	1	3.18e-05	25	1	3.14e-05	23.4	1	9.06667e-06	25	1	1.872e-05	25	1	2.15e-05	25	1	2.28e-05	25	1	2.19e-05	23.4	1	1.25e-05	23.4	1	2.81667e-05	23.4	1	1.69e-05	23.4	1	2.88e-05	23.4	1	2.44e-05	23.4	1	1.32e-05	25	1	8.95e-06	23.4	1	7.73333e-06	23.4	1
24.4	1	2.29333e-05	24.4	1	3.115e-05	24.4	1	3.08e-05	22.8	1	8.76667e-06	24.4	1	1.824e-05	24.4	1	2.115e-05	24.4	1	2.24e-05	24.4	1	2.16e-05	22.8	1	1.23e-05	22.8	1	2.76667e-05	22.8	1	1.655e-05	22.8	1	2.82e-05	22.8	1	2.36e-05	22.8	1	1.29e-05	24.4	1	8.65e-06	22.8	1	7.5e-06	22.8	1
[truncated: 826 more rows]
[truncated: 235 more columns]

## Sheet: F5e-h-range
Mobility(cm2/v s)	Cd-MoS2	Cr/Au-MoS2		Hysteresis width	Cd-MoS2	Cr/Au-MoS2		VTH	Cd-MoS2	Cr/Au-MoS2			Ion/Ioff	Cd-MoS2	Cr/Au-MoS2
[truncated: 9 more rows]

[truncated: 1 more sheets: F5i-l]
